# Supplementary material for: Design, Synthesis, Mode of Action and Herbicidal Evaluation of Quinazolin-4(3H)-one Derivatives Based on Aryloxyphenoxypropionate Motif
Source: MDPI journal article supplement (doi:10.3390/agronomy12081840), 2022-08-03

# Supporting Information

**Design, Synthesis, Mode of Action and Herbicidal Evaluation of Quinazolin-4(3*H*)-one**

**Derivatives Based on Aryloxyphenoxypropionate Motif**

Chao-Chao Wang<sup>1</sup>, Ke Chen<sup>2</sup>, Na Li<sup>1</sup>, Shu-Yue Fu<sup>1</sup>, Pan Li<sup>1</sup>, Lu-Sha Ji<sup>1</sup>, Guo-Yun Liu<sup>1</sup>, Xue-Kun

Wang and Kang Lei<sup>\*,1</sup>

<sup>1</sup> School of Pharmaceutical Sciences, Liaocheng University, Liaocheng 252000, China

<sup>2</sup> Medical School, Liaocheng University, Liaocheng 252000, China

\* Correspondence to: Kang Lei, E-mail: leikang@lcu.edu.cn

### **Inhibition of the root growth of *Brassica campestris***

Emulsions of target compounds and quizalofop-P-ethyl were prepared by dissolving them in 100  $\mu$ L of DMF adding a few drops of Tween-80 and dispersing in water. A mixture of the same amount of water, DMF and Tween-80 was used as control. Rape seeds were soaked in distilled water for 4 h before being placed on a filter paper in a 6 cm petri plate, to which 2 mL of inhibitor solution had been added in advance. Usually, 15 seeds were used on each plate. The plate was placed in a dark room and allowed to germinate for 65 h at  $28 \pm 1$  °C. The lengths of ten *B. campestris* roots randomly selected from each plate were measured, and the means were calculated. Each treatment was performed triplicate. Formulas used in these tests are as follows: Control effect (%) = (the root length of *B. campestris* of the control – the root length of *B. campestris* treated by tested compound)/the root length of *B. campestris* of the control  $\times 100\%$ . The data represented the percent displaying herbicidal damage as compared to the control, where complete control of the target is 100 and no control is 0.

### **Inhibition of the seedling growth of *Echinochloa crusgalli***

Emulsions of target compounds and quizalofop-P-ethyl were prepared according to above method. A mixture of the same amount of water, DMF and Tween-80 was used as control. 10 *E. crusgalli* seeds were placed into a 25 mL cup covered with a layer of glass beads and a piece of filter paper at the bottom, to which 2.5 mL of inhibitor solution had been added in advance. The cup was placed in a bright room, and the seeds were allowed to germinate for 72 h at  $28 \pm 1$  °C. The heights of the above-ground parts of the seedlings in each cup were measured, and the means were calculated. Formulas used in these tests are as follows: Control effect (%) = (the height of *E. crusgalli* of the control – the height of *E. crusgalli* treated by tested compound)/the height of *E. crusgalli* of the control  $\times 100\%$ . The percentage inhibition was used to describe the control efficiency of the compounds. The data represented the percent displaying herbicidal damage as compared to the control, where complete control of the target is 100 and no control is 0. Each test was performed in triplicate.

### **Greenhouse Tests**

The greenhouse herbicidal activities of target compounds and control compounds were evaluated using a standard procedure at Nankai University. Two dicotyledonous species mustard (*Brassica campestris*) and amaranth pigweed (*Amaranthus retroflexus*), and two monocotyledonous species

barnyard grass (*Echinochloa crusgalli*) and crabgrass (*Digitaria sanguinalis*) were used to test the herbicidal activities of the compounds. For pre-emergence tests, sandy clay (100 g) in a 7-cm-diameter test pot was wetted by water. Then 15 sprouting seeds of the weed were planted to 0.6 cm depth and placed in a greenhouse. All the tested compounds were dissolved in 100 % DMF and then diluted with Tween-80 (concentration: 100 g/L). The resulting solutions were diluted with water to the appropriate concentrations before use. The solutions of the compounds evaluated were sprayed immediately after seed planting. The mixture of same amount of water, *N*, *N*-dimethylformamide and Tween 80 was sprayed as the control. For post-emergence tests, the same solution of the compounds was applied at the same rate as for the pre-emergence tests. Compounds were sprayed immediately after the expansion of the first true leaf. After 14 days, the fresh weight of the above-ground tissues in each pot was weighed and the percentage of inhibition calculated. Each treatment was done in triplicate, all the experiments were performed under natural light conditions at 18 – 28 °C. Additionally, adverse weather lighting was provided using sodium vapour lamps with a 12 : 12 h light : dark photo period.

Formulas used in these tests are as follows: Control effect (%) = (the weight of live weeds in the control pots – the weight of live weeds in the treated pots)/the weight of live weeds in the control pots × 100%. The data represented the percent displaying herbicidal damage as compared to the control, where complete control of the target is 100 and no control is 0.

### Crop selectivity

The crops were planted in flowerpots (12 cm diameter) and grown at room temperature in the test soil. Crop safety experiments were conducted at the dosage of 375 g ha<sup>-1</sup> when the crops had reached the four-leaf stage. After 14 days of treatment by compound **QPP-7**, the crop selectivity was evaluated with three duplicates per experiment.

### The <sup>1</sup>H NMR and <sup>13</sup>C NMR Data of Compounds 2a-2o

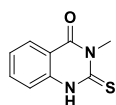

3-Methyl-2-thioxo-2,3-dihydroquinazolin-4(1*H*)-one (**2a**): white solid, yield 92.7%, m.p. 244-247 °C; <sup>1</sup>H NMR (500 MHz, DMSO) δ: 12.94 (s, 1H), 7.96 (dd, *J* = 8.0, 1.3 Hz, 1H), 7.75 – 7.72 (m, 1H), 7.39 (d, *J* = 8.2 Hz, 1H), 7.36 – 7.30 (m, 1H), 3.66 (s, 3H); <sup>13</sup>C NMR (125 MHz, DMSO) δ: 175.8, 160.1, 139.5, 135.8, 127.7, 124.8, 116.0, 115.7, 33.7.

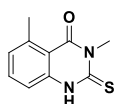

3,5-Dimethyl-2-thioxo-2,3-dihydroquinazolin-4(1*H*)-one (**2b**): white solid, yield 71.3%, m.p. 243-246 °C; <sup>1</sup>H NMR (500 MHz, DMSO)  $\delta$ : 12.78 (s, 1H), 7.56 (t,  $J$  = 7.8 Hz, 1H), 7.26 (d,  $J$  = 8.2 Hz, 1H), 7.11 (d,  $J$  = 7.3 Hz, 1H), 3.63 (s, 3H), 2.69 (s, 3H); <sup>13</sup>C NMR (125 MHz, DMSO)  $\delta$ : 175.3, 160.5, 141.5, 140.7, 134.8, 127.4, 114.2, 114.1, 33.8, 22.7.

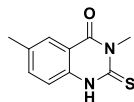

3,6-Dimethyl-2-thioxo-2,3-dihydroquinazolin-4(1*H*)-one (**2c**): white solid, yield 95.0%, m.p. 237-240 °C; <sup>1</sup>H NMR (500 MHz, DMSO)  $\delta$ : 12.89 (s, 1H), 7.76 (s, 1H), 7.56 (d,  $J$  = 8.3 Hz, 1H), 7.30 (d,  $J$  = 8.3 Hz, 1H), 3.65 (s, 3H), 2.36 (s, 3H); <sup>13</sup>C NMR (125 MHz, DMSO)  $\delta$ : 175.3, 160.1, 137.5, 136.9, 134.4, 127.0, 116.0, 115.6, 33.7, 20.9.

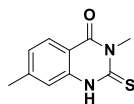

3,7-Dimethyl-2-thioxo-2,3-dihydroquinazolin-4(1*H*)-one (**2d**): white solid, yield 89.7%, m.p. 258-260 °C; <sup>1</sup>H NMR (500 MHz, DMSO)  $\delta$ : 12.86 (s, 1H), 7.84 (d,  $J$  = 8.0 Hz, 1H), 7.16 (d,  $J$  = 8.7 Hz, 2H), 3.64 (s, 3H), 2.40 (s, 3H); <sup>13</sup>C NMR (125 MHz, DMSO)  $\delta$ : 175.8, 159.9, 146.6, 139.5, 127.7, 126.3, 115.6, 113.5, 33.7, 22.1

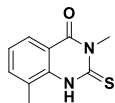

3,8-Dimethyl-2-thioxo-2,3-dihydroquinazolin-4(1*H*)-one (**2e**): white solid, yield 89.8%, m.p. 228-230 °C; <sup>1</sup>H NMR (500 MHz, DMSO)  $\delta$ : 11.68 (s, 1H), 7.92 – 7.75 (m, 1H), 7.56 (d,  $J$  = 7.2 Hz, 1H), 7.23 (t,  $J$  = 7.6 Hz, 1H), 3.67 (s, 3H), 2.47 (s, 3H); <sup>13</sup>C NMR (125 MHz, DMSO)  $\delta$ : 176.2, 160.1, 137.9, 136.9, 125.6, 124.8, 124.7, 116.1, 34.0, 17.7.

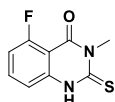

5-Fluoro-3-methyl-2-thioxo-2,3-dihydroquinazolin-4(1*H*)-one (**2f**): white solid, yield 81.1%, m.p. 280-283 °C; <sup>1</sup>H NMR (500 MHz, DMSO)  $\delta$ : 12.98 (s, 1H), 7.74 – 7.69 (m, 1H), 7.20 (d,  $J$  = 8.3 Hz, 1H), 7.10 – 7.06 (m, 1H), 3.61 (s, 3H); <sup>13</sup>C NMR (125 MHz, DMSO)  $\delta$ : 175.9, 161.22 (d,  $J$  = 262.1 Hz), 156.9 (d,  $J$  = 4.0 Hz), 141.1 (d,  $J$  = 2.2 Hz), 136.8 (d,  $J$  = 10.8 Hz), 112.1 (d,  $J$  = 4.2 Hz), 111.3 (d,  $J$  = 20.4 Hz), 105.6 (d,  $J$  = 9.4 Hz), 33.5.

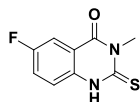

6-Fluoro-3-methyl-2-thioxo-2,3-dihydroquinazolin-4(1*H*)-one (**2g**): white solid, yield 82.5%, m.p. 266-269 °C; <sup>1</sup>H NMR (500 MHz, DMSO)  $\delta$ : 12.98 (s, 1H), 7.69 – 7.56 (m, 2H), 7.43 – 7.40 (m, 1H), 3.64 (s, 3H); <sup>13</sup>C NMR (125 MHz, DMSO)  $\delta$ : 175.3, 158.7 (d,  $J$  = 241.1 Hz), 159.4 (d,  $J$  = 3.2 Hz), 136.3, 123.9 (d,  $J$  = 24.5 Hz), 118.7 (d,  $J$  = 8.2 Hz), 116.9 (d,  $J$  = 8.2 Hz), 112.5 (d,  $J$  = 24.3 Hz), 33.8.



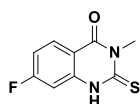

7-Fluoro-3-methyl-2-thioxo-2,3-dihydroquinazolin-4(1*H*)-one (**2h**): white solid, yield 59.8%, m.p. 241–244 °C; <sup>1</sup>H NMR (500 MHz, DMSO)  $\delta$ : 12.97 (s, 1H), 8.03 – 8.00 (m, 1H), 7.19 – 7.15 (m, 1H), 7.13 – 7.07 (m, 1H), 3.63 (s, 3H); <sup>13</sup>C NMR (125 MHz, DMSO)  $\delta$ : 176.3, 166.2 (d, *J* = 252.5 Hz), 159.3, 141.2 (d, *J* = 13.1 Hz), 131.2 (d, *J* = 11.3 Hz), 113.0 (d, *J* = 23.4 Hz), 112.8, 102.0 (d, *J* = 26.3 Hz), 33.7.

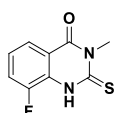

8-Fluoro-3-methyl-2-thioxo-2,3-dihydroquinazolin-4(1*H*)-one (**2i**): white solid, yield 75.0%, m.p. 217–219 °C; <sup>1</sup>H NMR (500 MHz, DMSO)  $\delta$ : 12.88 (s, 1H), 7.78 (d, *J* = 8.0 Hz, 1H), 7.66 – 7.62 (m, 1H), 7.33 – 7.29 (m, 1H), 3.66 (s, 3H); <sup>13</sup>C NMR (125 MHz, DMSO)  $\delta$ : 176.2, 159.11 (d, *J* = 3.0 Hz), 148.6 (d, *J* = 250.9 Hz), 128.6 (d, *J* = 14.4 Hz), 124.8 (d, *J* = 6.6 Hz), 123.4 (d, *J* = 3.7 Hz), 121.1 (d, *J* = 16.9 Hz), 117.9 (d, *J* = 1.5 Hz), 33.9.

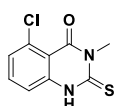

5-Chloro-3-methyl-2-thioxo-2,3-dihydroquinazolin-4(1*H*)-one (**2j**): white solid, yield 72.8%, m.p. 250–253 °C; <sup>1</sup>H NMR (500 MHz, DMSO)  $\delta$ : 12.94 (s, 1H), 7.76 – 7.48 (m, 1H), 7.35 – 7.31 (m, 2H), 3.62 (s, 3H); <sup>13</sup>C NMR (125 MHz, DMSO)  $\delta$ : 175.5, 157.8, 141.8, 135.5, 134.1, 127.2, 115.4, 112.6, 33.9.

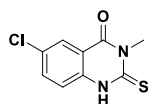

6-Chloro-3-methyl-2-thioxo-2,3-dihydroquinazolin-4(1*H*)-one (**2k**): white solid, yield 92.4%, m.p. 246–249 °C; <sup>1</sup>H NMR (500 MHz, DMSO)  $\delta$ : 13.01 (s, 1H), 7.83 (d, *J* = 2.4 Hz, 1H), 7.75 (dd, *J* = 8.8, 2.5 Hz, 1H), 7.37 (d, *J* = 8.8 Hz, 1H), 3.63 (s, 3H); <sup>13</sup>C NMR (125 MHz, DMSO)  $\delta$ : 175.7, 159.1, 138.2, 135.6, 128.7, 126.5, 118.3, 117.0, 33.8.

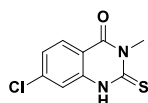

7-Chloro-3-methyl-2-thioxo-2,3-dihydroquinazolin-4(1*H*)-one (**2l**): white solid, yield 88.1%, m.p. 260–263 °C; <sup>1</sup>H NMR (500 MHz, DMSO)  $\delta$ : 12.97 (s, 1H), 7.96 (d, *J* = 8.5 Hz, 1H), 7.40 (d, *J* = 1.8 Hz, 1H), 7.36 (dd, *J* = 8.5, 1.9 Hz, 1H), 3.64 (s, 3H); <sup>13</sup>C NMR (125 MHz, DMSO)  $\delta$ : 176.3, 159.5, 140.4, 140.1, 129.9, 124.9, 115.4, 114.7, 33.8.

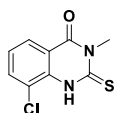

8-Chloro-3-methyl-2-thioxo-2,3-dihydroquinazolin-4(1*H*)-one (**2m**): white solid, yield 72.5%, m.p. 174–176 °C; <sup>1</sup>H NMR (500 MHz, DMSO)  $\delta$ : 11.51 (s, 1H), 7.93 (dd, *J* = 7.9, 1.3 Hz, 1H), 7.86 (dd, *J* = 7.9, 1.3 Hz, 1H), 7.33 (t, *J* = 7.9 Hz, 1H), 3.66 (s, 3H); <sup>13</sup>C NMR (125 MHz, DMSO)  $\delta$ : 176.4, 159.2, 136.1, 135.8, 127.0, 125.4, 118.7, 117.6, 34.2.

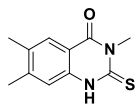

3,6,7-Trimethyl-2-thioxo-2,3-dihydroquinazolin-4(1*H*)-one (**2n**): white solid, yield 85.5%, m.p. 260-263 °C; <sup>1</sup>H NMR (500 MHz, DMSO)  $\delta$ : 7.73 (s, 1H), 7.16 (s, 1H), 3.64 (s, 3H), 2.31 (s, 3H), 2.28 (s, 3H); <sup>13</sup>C NMR (125 MHz, DMSO)  $\delta$ : 175.3, 159.9, 145.9, 137.9, 133.9, 127.4, 116.2, 113.6, 33.7, 20.7, 19.4.

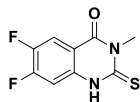

6,7-Difluoro-3-methyl-2-thioxo-2,3-dihydroquinazolin-4(1*H*)-one (**2o**): white solid, yield 53.4%, m.p. 275-276 °C; <sup>1</sup>H NMR (500 MHz, DMSO)  $\delta$ : 13.00 (s, 1H), 7.90 (dd, *J* = 10.1, 8.4 Hz, 1H), 7.30 (dd, *J* = 10.9, 6.7 Hz, 1H), 3.62 (s, 3H); <sup>13</sup>C NMR (125 MHz, DMSO)  $\delta$ : 175.9, 158.8, 154.3 (dd, *J* = 255.2, 14.7 Hz), 147.0 (dd, *J* = 245.6, 13.9 Hz), 137.2 (d, *J* = 11.0 Hz), 115.9 (d, *J* = 19.5 Hz), 112.8 (d, *J* = 6.5 Hz), 104.9 (d, *J* = 21.9 Hz), 33.8.

#### The <sup>1</sup>H NMR and <sup>13</sup>C NMR Data of Compounds 3a-3o

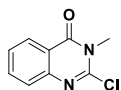

2-Chloro-3-methylquinazolin-4(3*H*)-one (**3a**): white solid, yield 60.3%, m.p. 109-110 °C; <sup>1</sup>H NMR (500 MHz, DMSO)  $\delta$ : 8.12 (dd, *J* = 8.0, 1.3 Hz, 1H), 7.85 (ddd, *J* = 8.5, 7.2, 1.5 Hz, 1H), 7.62 (d, *J* = 8.1 Hz, 1H), 7.59 – 7.55 (m, 1H), 3.63 (s, 3H); <sup>13</sup>C NMR (125 MHz, DMSO)  $\delta$ : 161.8, 146.6, 145.8, 135.5, 127.9, 127.2, 126.8, 120.3, 33.6.

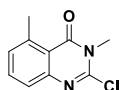

2-Chloro-3,5-dimethylquinazolin-4(3*H*)-one (**3b**): white solid, yield 48.9%, m.p. 118-119 °C; <sup>1</sup>H NMR (500 MHz, CDCl<sub>3</sub>)  $\delta$ : 7.58 (t, *J* = 7.8 Hz, 1H), 7.47 (d, *J* = 8.1 Hz, 1H), 7.25 (d, *J* = 7.4 Hz, 1H), 3.71 (s, 3H), 2.84 (s, 3H); <sup>13</sup>C NMR (125 MHz, CDCl<sub>3</sub>)  $\delta$ : 162.4, 147.7, 144.8, 141.6, 133.9, 130.1, 124.8, 118.5, 33.2, 22.9.

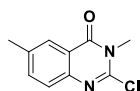

2-Chloro-3,6-dimethylquinazolin-4(3*H*)-one (**3c**): white solid, yield 52.6%, m.p. 130-133 °C; <sup>1</sup>H NMR (500 MHz, DMSO)  $\delta$ : 7.89 (s, 1H), 7.66 (dd, *J* = 8.3, 1.9 Hz, 1H), 7.50 (d, *J* = 8.3 Hz, 1H), 3.61 (s, 3H), 2.44 (s, 3H); <sup>13</sup>C NMR (125 MHz, DMSO)  $\delta$ : 161.7, 144.8, 144.6, 137.7, 136.7, 126.7, 126.4, 120.0, 33.5, 21.3.

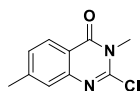

2-Chloro-3,7-dimethylquinazolin-4(3*H*)-one (**3d**): white solid, yield 54.2%, m.p. 90-92 °C; <sup>1</sup>H NMR (500 MHz, DMSO)  $\delta$ : 7.99 (d, *J* = 8.1 Hz, 1H), 7.41 (s, 1H), 7.39 (d, *J* = 8.2 Hz, 1H), 3.61 (s, 3H), 2.46 (s, 3H); <sup>13</sup>C NMR (125 MHz, DMSO)  $\delta$ : 161.7, 146.7, 146.2, 145.7, 129.3, 127.0, 126.4, 117.9, 33.5, 21.8.

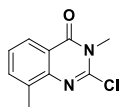

2-Chloro-3,8-dimethylquinazolin-4(3*H*)-one (**3e**): white solid, yield 49.8%, m.p. 107-108 °C; <sup>1</sup>H NMR (500 MHz, DMSO)  $\delta$ : 7.94 (dd,  $J$  = 7.9, 0.7 Hz, 1H), 7.78 – 7.65 (m, 1H), 7.44 (t,  $J$  = 7.6 Hz, 1H), 3.62 (s, 3H), 2.48 (s, 3H); <sup>13</sup>C NMR (125 MHz, DMSO)  $\delta$ : 162.1, 145.2, 144.8, 135.8, 135.0, 127.4, 124.8, 120.2, 33.6, 17.2.

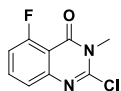

2-Chloro-5-fluoro-3-methylquinazolin-4(3*H*)-one (**3f**): white solid, yield 50.2%, m.p. 155-156 °C; <sup>1</sup>H NMR (500 MHz, CDCl<sub>3</sub>)  $\delta$ : 7.69 (td,  $J$  = 8.2, 5.4 Hz, 1H), 7.41 (d,  $J$  = 8.2 Hz, 1H), 7.18 – 7.10 (m, 1H), 3.73 (s, 3H); <sup>13</sup>C NMR (125 MHz, CDCl<sub>3</sub>)  $\delta$ : 161.2 (d,  $J$  = 266.7 Hz), 158.8 (d,  $J$  = 4.5 Hz), 148.1, 146.2, 135.3 (d,  $J$  = 10.3 Hz), 122.7 (d,  $J$  = 4.4 Hz), 114.1 (d,  $J$  = 20.9 Hz), 109.8 (d,  $J$  = 6.5 Hz), 33.2.

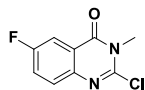

2-Chloro-6-fluoro-3-methylquinazolin-4(3*H*)-one (**3g**): white solid, yield 48.9%, m.p. 110-111 °C; <sup>1</sup>H NMR (500 MHz, CDCl<sub>3</sub>)  $\delta$ : 7.84 (dd,  $J$  = 8.3, 2.9 Hz, 1H), 7.63 (dd,  $J$  = 8.9, 4.8 Hz, 1H), 7.47 (ddd,  $J$  = 8.9, 8.1, 3.0 Hz, 1H), 3.76 (s, 1H); <sup>13</sup>C NMR (125 MHz, CDCl<sub>3</sub>)  $\delta$ : 161.3 (d,  $J$  = 3.6 Hz), 161.0 (d,  $J$  = 249.4 Hz), 144.5 (d,  $J$  = 2.3 Hz), 143.1 (d,  $J$  = 1.6 Hz), 129.1 (d,  $J$  = 8.3 Hz), 123.5 (d,  $J$  = 24.4 Hz), 121.4 (d,  $J$  = 9.1 Hz), 112.2 (d,  $J$  = 24.2 Hz), 33.5.

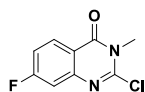

2-Chloro-7-fluoro-3-methylquinazolin-4(3*H*)-one (**3h**): white solid, yield 49.2%, m.p. 115-116 °C; <sup>1</sup>H NMR (500 MHz, CDCl<sub>3</sub>)  $\delta$ : 8.25 (dd,  $J$  = 8.9, 6.0 Hz, 1H), 7.30 – 7.27 (m, 1H), 7.22 (td,  $J$  = 8.5, 2.5 Hz, 1H), 3.76 (s, 3H); <sup>13</sup>C NMR (125 MHz, CDCl<sub>3</sub>)  $\delta$ : 166.69 (d,  $J$  = 255.8 Hz), 161.2, 148.4 (d,  $J$  = 13.5 Hz), 146.6, 130.1 (d,  $J$  = 10.8 Hz), 116.8 (d,  $J$  = 2.1 Hz), 116.3 (d,  $J$  = 23.7 Hz), 112.3 (d,  $J$  = 22.4 Hz), 33.4.

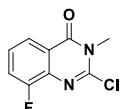

2-Chloro-8-fluoro-3-methylquinazolin-4(3*H*)-one (**3i**): white solid, yield 53.0%, m.p. 159-162 °C; <sup>1</sup>H NMR (500 MHz, DMSO)  $\delta$ : 7.93 (d,  $J$  = 8.0 Hz, 1H), 7.74 (ddd,  $J$  = 10.4, 8.1, 1.3 Hz, 1H), 7.56 (td,  $J$  = 8.0, 4.8 Hz, 1H), 3.63 (s, 3H); <sup>13</sup>C NMR (125 MHz, DMSO)  $\delta$ : 161.0, 155.9 (d,  $J$  = 254.1 Hz), 146.8, 135.8 (d,  $J$  = 12.7 Hz), 128.3 (d,  $J$  = 7.7 Hz), 122.9 (d,  $J$  = 4.2 Hz), 122.4 (s), 120.8 (d,  $J$  = 18.4 Hz), 33.8.

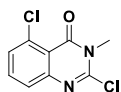

2,5-Dichloro-3-methylquinazolin-4(3*H*)-one (**3j**): white solid, yield 53.2%, m.p. 149-152 °C; <sup>1</sup>H NMR (500 MHz, CDCl<sub>3</sub>)  $\delta$ : 7.59 (t,  $J$  = 8.0 Hz, 1H), 7.51 – 7.47 (m, 2H), 3.73 (s, 3H); <sup>13</sup>C NMR (125 MHz, CDCl<sub>3</sub>)  $\delta$ : 159.8, 148.7, 145.8, 134.6, 134.2, 130.2, 125.9, 117.2, 33.6.

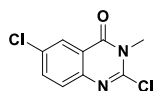

2,6-Dichloro-3-methylquinazolin-4(3H)-one (**3k**): white solid, yield 54.1%, m.p. 152-155 °C; <sup>1</sup>H NMR (500 MHz, DMSO)  $\delta$ : 8.02 (d,  $J$  = 2.5 Hz, 1H), 7.87 (dd,  $J$  = 8.7, 2.5 Hz, 1H), 7.63 (d,  $J$  = 8.7 Hz, 1H), 3.62 (s, 3H); <sup>13</sup>C NMR (125 MHz, DMSO)  $\delta$ : 160.8, 146.4, 145.3, 135.5, 132.0, 129.1, 126.1, 121.6, 33.8.

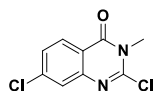

2,7-Dichloro-3-methylquinazolin-4(3H)-one (**3l**): white solid, yield 50.5%, m.p. 102-106 °C; <sup>1</sup>H NMR (500 MHz, CDCl<sub>3</sub>)  $\delta$ : 8.15 (d,  $J$  = 8.6 Hz, 1H), 7.60 (d,  $J$  = 1.9 Hz, 1H), 7.44 (dd,  $J$  = 8.6, 2.0 Hz, 1H), 3.75 (s, 3H); <sup>13</sup>C NMR (125 MHz, CDCl<sub>3</sub>)  $\delta$ : 161.4, 147.3, 146.4, 141.2, 128.7, 128.1, 126.3, 118.5, 33.4.

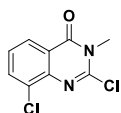

2,8-Dichloro-3-methylquinazolin-4(3H)-one (**3m**): white solid, yield 62.2%, m.p. 118-121 °C; <sup>1</sup>H NMR (500 MHz, CDCl<sub>3</sub>)  $\delta$ : 8.14 (d,  $J$  = 8.0 Hz, 1H), 7.82 (d,  $J$  = 7.8 Hz, 1H), 7.41 (t,  $J$  = 7.9 Hz, 1H), 3.77 (s, 3H); <sup>13</sup>C NMR (125 MHz, CDCl<sub>3</sub>)  $\delta$ : 161.5, 146.2, 143.4, 135.1, 131.1, 127.5, 126.0, 121.6, 33.6.

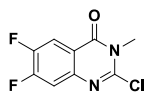

2-Chloro-6,7-difluoro-3-methylquinazolin-4(3H)-one (**3n**): white solid, yield 59.8%, m.p. 162-163 °C; <sup>1</sup>H NMR (500 MHz, DMSO)  $\delta$ : 8.06 (dd,  $J$  = 10.3, 8.6 Hz, 1H), 7.78 (dd,  $J$  = 11.2, 7.2 Hz, 1H), 3.62 (s, 3H); <sup>13</sup>C NMR (125 MHz, CDCl<sub>3</sub>)  $\delta$ : 160.6, 155.2 (dd,  $J$  = 259.2, 14.7 Hz), 150.0 (dd,  $J$  = 253.3, 14.1 Hz), 145.9, 144.1 (d,  $J$  = 9.2 Hz), 117.1 (d,  $J$  = 6.5 Hz), 114.8 (d,  $J$  = 17.6 Hz), 114.7 (dd,  $J$  = 20.2, 2.5 Hz), 33.5.

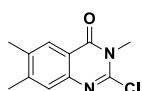

2-Chloro-3,6,7-trimethylquinazolin-4(3H)-one (**3o**): white solid, yield 50.6%, m.p. 164-166 °C; <sup>1</sup>H NMR (500 MHz, DMSO)  $\delta$ : 7.86 (s, 1H), 7.40 (s, 1H), 3.61 (s, 3H), 2.37 (s, 3H), 2.35 (s, 3H); <sup>13</sup>C NMR (125 MHz, DMSO)  $\delta$ : 161.6, 145.6, 145.0, 144.8, 137.3, 126.8, 126.7, 118.0, 33.5, 20.3, 19.7.

#### The <sup>1</sup>H NMR and <sup>13</sup>C NMR Data of Compounds 5a-5n

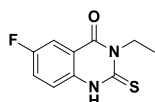

3-Ethyl-6-fluoro-2-thioxo-2,3-dihydroquinazolin-4(1H)-one (**5a**): white solid, yield 83.5%, m.p. 246-247 °C; <sup>1</sup>H NMR (500 MHz, DMSO)  $\delta$ : 12.99 (s, 1H), 7.82 – 7.55 (m, 2H), 7.53 – 7.37 (m, 1H), 4.44 (q,  $J$  = 7.0 Hz, 2H), 1.23 (t,  $J$  = 7.0 Hz, 3H); <sup>13</sup>C NMR (125 MHz, DMSO)  $\delta$ : 174.8, 158.9 (d,  $J$  = 3.2 Hz), 158.8 (d,  $J$  = 243.2 Hz), 136.4, 124.1 (d,  $J$  = 24.6 Hz), 118.7 (d,  $J$  = 8.2 Hz), 117.3 (d,  $J$  = 8.3 Hz), 112.6 (d,  $J$  = 24.3 Hz), 41.6, 12.3.

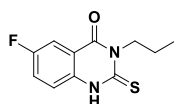

6-Fluoro-3-propyl-2-thioxo-2,3-dihydroquinazolin-4(1*H*)-one (**5b**): white solid, yield 76.0%, m.p. 232–235 °C; <sup>1</sup>H NMR (500 MHz, DMSO)  $\delta$ : 13.00 (s, 1H), 7.78 – 7.56 (m, 2H), 7.48 – 7.32 (m, 1H), 4.42 – 4.19 (m, 2H), 1.77 – 1.57 (m, 2H), 0.91 (t, *J* = 7.5 Hz, 3H); <sup>13</sup>C NMR (125 MHz, DMSO)  $\delta$ : 175.1, 159.1 (d, *J* = 2.8 Hz), 158.8 (d, *J* = 243.2 Hz), 136.4, 124.1 (d, *J* = 24.7 Hz), 118.8 (d, *J* = 8.2 Hz), 117.2 (d, *J* = 8.2 Hz), 112.7 (d, *J* = 24.1 Hz), 47.7, 20.1, 11.6.

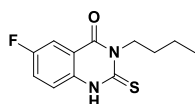

3-Butyl-6-fluoro-2-thioxo-2,3-dihydroquinazolin-4(1*H*)-one (**5c**): white solid, yield 71.5%, m.p. 203–204 °C; <sup>1</sup>H NMR (500 MHz, DMSO)  $\delta$ : 12.99 (s, 1H), 7.73 – 7.55 (m, 2H), 7.43 (dd, *J* = 9.9, 4.4 Hz, 1H), 4.46 – 4.27 (m, 2H), 1.66 (dt, *J* = 15.2, 7.6 Hz, 2H), 1.43 – 1.25 (m, 2H), 0.93 (t, *J* = 7.4 Hz, 3H); <sup>13</sup>C NMR (125 MHz, DMSO)  $\delta$ : 174.9, 159.0 (d, *J* = 3.0 Hz), 158.8 (d, *J* = 243.2 Hz), 136.4, 124.1 (d, *J* = 24.6 Hz), 118.7 (d, *J* = 8.2 Hz), 117.2 (d, *J* = 8.2 Hz), 112.6 (d, *J* = 24.1 Hz), 46.0, 28.8, 20.1, 14.1.

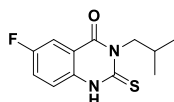

6-Fluoro-3-isobutyl-2-thioxo-2,3-dihydroquinazolin-4(1*H*)-one (**5d**): white solid, yield 37.5%, m.p. 217–219 °C; <sup>1</sup>H NMR (500 MHz, DMSO)  $\delta$ : 13.00 (s, 1H), 7.75 – 7.56 (m, 2H), 7.46 – 7.43 (m, 1H), 4.27 (d, *J* = 7.4 Hz, 2H), 2.39 – 2.31 (m, 1H), 0.90 (s, 3H), 0.88 (s, 3H); <sup>13</sup>C NMR (125 MHz, DMSO)  $\delta$ : 175.6, 159.6 (d, *J* = 2.8 Hz), 158.8 (d, *J* = 243.2 Hz), 136.5, 124.1 (d, *J* = 24.6 Hz), 118.8 (d, *J* = 8.1 Hz), 117.1 (d, *J* = 8.2 Hz), 112.8 (d, *J* = 24.3 Hz), 52.4, 26.7, 20.5.

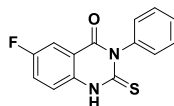

6-Fluoro-3-phenyl-2-thioxo-2,3-dihydroquinazolin-4(1*H*)-one (**5e**): white solid, yield 84.0%, m.p. 264–267 °C; <sup>1</sup>H NMR (500 MHz, DMSO)  $\delta$ : 13.12 (s, 1H), 7.76 – 7.64 (m, 2H), 7.55 – 7.45 (m, 3H), 7.43 – 7.38 (m, 1H), 7.29 – 7.27 (m, 2H); <sup>13</sup>C NMR (125 MHz, DMSO)  $\delta$ : 176.1, 159.7, 158.7 (d, *J* = 239.2 Hz), 139.6, 137.0, 129.4, 128.7, 124.2 (d, *J* = 24.6 Hz), 118.9 (d, *J* = 7.8 Hz), 118.0 (d, *J* = 8.1 Hz), 112.9 (d, *J* = 24.2 Hz).

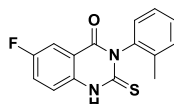

6-Fluoro-2-thioxo-3-(*o*-tolyl)-2,3-dihydroquinazolin-4(1*H*)-one (**5f**): white solid, yield 80.9%, m.p. 271–274 °C; <sup>1</sup>H NMR (500 MHz, DMSO)  $\delta$ : 13.19 (s, 1H), 7.78 – 7.64 (m, 2H), 7.52 (dd, *J* = 9.0, 4.5 Hz, 1H), 7.36 – 7.27 (m, 3H), 7.22 – 7.18 (m, 1H), 2.05 (s, 3H); <sup>13</sup>C NMR (125 MHz, DMSO)  $\delta$ : 175.3, 159.2 (d, *J* = 2.7 Hz), 158.5 (d, *J* = 243.2 Hz), 138.6, 137.1, 135.7, 130.9, 129.2, 128.9, 127.3, 124.4 (d, *J* = 24.6 Hz), 118.9 (d, *J* = 8.1 Hz), 117.6 (d, *J* = 8.1 Hz), 112.9 (d, *J* = 24.1 Hz), 17.4.

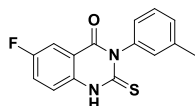

6-Fluoro-2-thioxo-3-(*m*-tolyl)-2,3-dihydroquinazolin-4(1*H*)-one (**5g**): white solid, yield 83.3%, m.p. 267-270 °C; <sup>1</sup>H NMR (500 MHz, DMSO)  $\delta$ : 13.10 (s, 1H), 7.71 (td,  $J$  = 8.7, 3.0 Hz, 1H), 7.66 (dd,  $J$  = 8.4, 2.9 Hz, 1H), 7.50 (dd,  $J$  = 9.0, 4.5 Hz, 1H), 7.36 (t,  $J$  = 7.7 Hz, 1H), 7.22 (d,  $J$  = 7.6 Hz, 1H), 7.08 – 7.06 (m, 2H), 2.34 (s, 3H); <sup>13</sup>C NMR (125 MHz, DMSO)  $\delta$ : 176.1, 159.6 (d,  $J$  = 2.8 Hz), 158.7 (d,  $J$  = 243.2 Hz), 139.5, 138.7, 136.9, 129.7, 129.3 (d,  $J$  = 16.3 Hz), 126.4, 124.2 (d,  $J$  = 24.4 Hz), 118.8 (d,  $J$  = 8.0 Hz), 117.9 (d,  $J$  = 8.2 Hz), 112.9 (d,  $J$  = 24.0 Hz), 21.3.

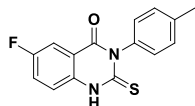

6-Fluoro-2-thioxo-3-(*p*-tolyl)-2,3-dihydroquinazolin-4(1*H*)-one (**5h**): white solid, yield 81.7%, m.p. 276-279 °C; <sup>1</sup>H NMR (500 MHz, DMSO)  $\delta$ : 13.09 (s, 1H), 7.74 – 7.63 (m, 2H), 7.49 (dd,  $J$  = 9.0, 4.5 Hz, 1H), 7.27 (d,  $J$  = 8.0 Hz, 2H), 7.14 (d,  $J$  = 8.2 Hz, 2H), 2.37 (s, 3H); <sup>13</sup>C NMR (125 MHz, DMSO)  $\delta$ : 176.2, 159.7 (d,  $J$  = 3.2 Hz), 158.7 (d,  $J$  = 243.0 Hz), 137.9, 137.0 (d,  $J$  = 10.2 Hz), 129.9, 129.1, 124.2 (d,  $J$  = 24.8 Hz), 118.8 (d,  $J$  = 8.1 Hz), 117.9 (d,  $J$  = 8.2 Hz), 112.9 (d,  $J$  = 24.1 Hz), 21.3.

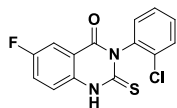

3-(2-Chlorophenyl)-6-fluoro-2-thioxo-2,3-dihydroquinazolin-4(1*H*)-one (**5i**): white solid, yield 69.9%, m.p. 273-276 °C; <sup>1</sup>H NMR (500 MHz, DMSO)  $\delta$ : 13.30 (s, 1H), 7.78 – 7.69 (m, 2H), 7.64 – 7.61 (m, 1H), 7.55 – 7.45 (m, 4H); <sup>13</sup>C NMR (125 MHz, DMSO)  $\delta$ : 175.1, 158.9 (d,  $J$  = 2.7 Hz), 158.8 (d,  $J$  = 243.0 Hz), 137.1, 136.8, 131.9, 131.7, 130.8, 130.2, 128.6, 124.7 (d,  $J$  = 24.6 Hz), 119.1 (d,  $J$  = 8.0 Hz), 117.4 (d,  $J$  = 8.2 Hz), 113.0 (d,  $J$  = 24.2 Hz).

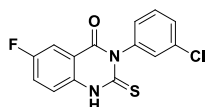

3-(3-Chlorophenyl)-6-fluoro-2-thioxo-2,3-dihydroquinazolin-4(1*H*)-one (**5j**): white solid, yield 70.9%, m.p. 250-253 °C; <sup>1</sup>H NMR (500 MHz, DMSO)  $\delta$ : 13.13 (s, 1H), 7.75 – 7.65 (m, 2H), 7.55 – 7.45 (m, 4H), 7.31 – 7.29 (m, 1H); <sup>13</sup>C NMR (125 MHz, DMSO)  $\delta$ : 175.8, 159.6 (d,  $J$  = 2.9 Hz), 158.7 (d,  $J$  = 243.0 Hz), 140.9, 137.1, 133.4, 130.9, 129.7, 128.8, 128.5, 124.3 (d,  $J$  = 24.3 Hz), 118.9 (d,  $J$  = 8.1 Hz), 118.1 (d,  $J$  = 8.0 Hz), 112.9 (d,  $J$  = 24.1 Hz).

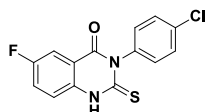

3-(4-Chlorophenyl)-6-fluoro-2-thioxo-2,3-dihydroquinazolin-4(1*H*)-one (**5k**): white solid, yield 86.6%, m.p. 269-272 °C; <sup>1</sup>H NMR (500 MHz, DMSO)  $\delta$ : 13.16 (s, 1H), 7.74 – 7.65 (m, 2H), 7.59 – 7.53 (m, 2H), 7.50 (dd,  $J$  = 9.0, 4.4 Hz, 1H), 7.37 – 7.31 (m, 2H); <sup>13</sup>C NMR (125 MHz, DMSO)  $\delta$ : 175.9, 159.6 (d,  $J$  = 2.7 Hz), 158.7 (d,  $J$  = 243.0 Hz), 138.6, 136.9, 133.3, 131.5, 129.5, 124.3 (d,  $J$  = 24.6 Hz), 118.9 (d,  $J$  = 8.0 Hz), 118.1 (d,  $J$  = 8.2 Hz), 112.9 (d,  $J$  = 24.3 Hz).

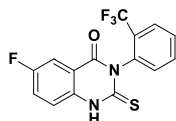

6-Fluoro-2-thioxo-3-(2-(trifluoromethyl)phenyl)-2,3-dihydroquinazolin-4(1*H*)-one (**5l**): white solid, yield 68.2%, m.p. 131-134 °C; <sup>1</sup>H NMR (500 MHz, DMSO)  $\delta$ : 13.29 (s, 1H), 7.91 – 7.81 (m,

2H), 7.79 – 7.66 (m, 3H), 7.60 (d,  $J = 7.9$  Hz, 1H), 7.53 (dd,  $J = 9.0, 4.4$  Hz, 1H);  $^{13}\text{C}$  NMR (125 MHz, DMSO)  $\delta$ : 175.9, 159.6 (d,  $J = 3.0$  Hz), 158.8 (d,  $J = 244.4$  Hz), 137.1, 136.9, 134.1, 132.6, 130.0, 127.6 (q,  $J = 4.4$  Hz), 126.6 (q,  $J = 30.4$  Hz), 124.7 (d,  $J = 24.6$  Hz), 122.6, 119.1 (d,  $J = 8.1$  Hz), 117.4 (d,  $J = 8.2$  Hz), 112.9 (d,  $J = 24.2$  Hz).

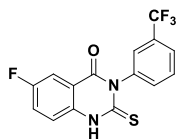

6-Fluoro-2-thioxo-3-(3-(trifluoromethyl)phenyl)-2,3-dihydroquinazolin-4(1H)-one (**5m**): white solid, yield 48.9%, m.p. 244-247 °C;  $^1\text{H}$  NMR (500 MHz, DMSO)  $\delta$ : 13.21 (s, 1H), 7.80 – 7.79 (m, 2H), 7.73 (td,  $J = 8.6, 3.0$  Hz, 2H), 7.68 (dd,  $J = 8.4, 2.9$  Hz, 1H), 7.64 (d,  $J = 7.9$  Hz, 1H), 7.51 (dd,  $J = 9.0, 4.5$  Hz, 1H);  $^{13}\text{C}$  NMR (125 MHz, DMSO)  $\delta$ : 175.9, 159.7 (d,  $J = 3.4$  Hz), 158.7 (d,  $J = 243.7$  Hz), 140.4, 137.0, 134.0, 130.2 (q,  $J = 16.4$  Hz), 127.7, 126.8 (q,  $J = 3.8$  Hz), 125.6 (d,  $J = 3.7$  Hz), 125.5 (d,  $J = 3.7$  Hz), 124.3 (d,  $J = 24.5$  Hz), 121.2, 118.9 (d,  $J = 8.1$  Hz), 118.2 (d,  $J = 8.2$  Hz), 112.9 (d,  $J = 24.2$  Hz).

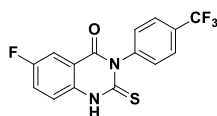

6-Fluoro-2-thioxo-3-(4-(trifluoromethyl)phenyl)-2,3-dihydroquinazolin-4(1H)-one (**5n**): white solid, yield 87.1%, m.p. 269-272 °C;  $^1\text{H}$  NMR (500 MHz, DMSO)  $\delta$ : 13.22 (s, 1H), 7.88 (d,  $J = 8.4$  Hz, 2H), 7.76 – 7.66 (m, 2H), 7.57 (d,  $J = 8.2$  Hz, 2H), 7.51 (dd,  $J = 9.0, 4.4$  Hz, 1H);  $^{13}\text{C}$  NMR (125 MHz, DMSO)  $\delta$ : 175.7, 159.6 (d,  $J = 3.1$  Hz), 158.7 (d,  $J = 243.2$  Hz), 143.4, 137.1, 130.8, 129.2 (d,  $J = 31.7$  Hz), 126.6 (d,  $J = 3.6$  Hz), 125.7, 124.3 (d,  $J = 24.4$  Hz), 123.5, 118.9 (d,  $J = 7.9$  Hz), 118.1 (d,  $J = 8.2$  Hz), 112.9 (d,  $J = 24.3$  Hz).

#### The $^1\text{H}$ NMR, $^{13}\text{C}$ NMR Data of Compounds 6a-6n

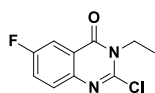

2-Chloro-3-ethyl-6-fluoroquinazolin-4(3H)-one (**6a**): white solid, yield 60.6%, m.p. 79-80 °C;  $^1\text{H}$  NMR (500 MHz,  $\text{CDCl}_3$ )  $\delta$ : 7.86 (dd,  $J = 8.3, 2.9$  Hz, 1H), 7.63 (dd,  $J = 8.9, 4.8$  Hz, 1H), 7.49 – 7.45 (m, 1H), 4.37 (q,  $J = 7.1$  Hz, 2H), 1.41 (t,  $J = 7.1$  Hz, 3H);  $^{13}\text{C}$  NMR (125 MHz,  $\text{CDCl}_3$ )  $\delta$ : 160.9 (d,  $J = 3.5$  Hz), 144.0, 143.2 (d,  $J = 1.7$  Hz), 129.1 (d,  $J = 8.4$  Hz), 123.5 (d,  $J = 24.1$  Hz), 121.7 (d,  $J = 8.8$  Hz), 112.2 (d,  $J = 24.0$  Hz), 42.3, 13.6.

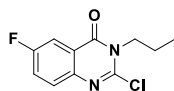

2-Chloro-6-fluoro-3-propylquinazolin-4(3H)-one (**6b**): white solid, yield 76.3%, m.p. 70-72 °C;  $^1\text{H}$  NMR (500 MHz,  $\text{CDCl}_3$ )  $\delta$ : 7.86 (dd,  $J = 8.3, 2.9$  Hz, 1H), 7.63 (dd,  $J = 8.9, 4.8$  Hz, 1H), 7.49 – 7.45 (m, 1H), 4.30 – 4.20 (m, 2H), 1.89 – 1.73 (m, 2H), 1.03 (t,  $J = 7.4$  Hz, 3H);  $^{13}\text{C}$  NMR (125 MHz,  $\text{CDCl}_3$ )  $\delta$ : 161.1 (d,  $J = 3.4$  Hz), 161.0 (d,  $J = 249.5$  Hz), 144.2 (d,  $J = 2.0$  Hz), 143.1 (d,  $J = 1.7$  Hz), 129.1 (d,  $J = 8.3$  Hz), 123.4 (d,  $J = 24.3$  Hz), 121.7 (d,  $J = 8.6$  Hz), 112.3 (d,  $J = 24.1$  Hz), 48.4, 21.8, 11.1.

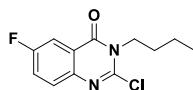

3-Butyl-2-chloro-6-fluoroquinazolin-4(3*H*)-one (**6c**): white solid, yield 65.0%, m.p. 61-62 °C; <sup>1</sup>H NMR (500 MHz, CDCl<sub>3</sub>) δ: 7.85 (dd, *J* = 8.3, 2.9 Hz, 1H), 7.63 (dd, *J* = 8.9, 4.8 Hz, 1H), 7.47 (td, *J* = 8.5, 3.0 Hz, 1H), 4.36 – 4.20 (m, 2H), 1.77 (dt, *J* = 12.7, 7.7 Hz, 2H), 1.56 – 1.36 (m, 2H), 1.00 (t, *J* = 7.4 Hz, 3H); <sup>13</sup>C NMR (125 MHz, CDCl<sub>3</sub>) δ: 161.1 (d, *J* = 3.5 Hz), 161.0 (d, *J* = 249.5 Hz), 144.2 (d, *J* = 2.4 Hz), 143.1 (d, *J* = 1.7 Hz), 129.1 (d, *J* = 8.3 Hz), 123.4 (d, *J* = 24.4 Hz), 121.7 (d, *J* = 8.6 Hz), 112.2 (d, *J* = 23.9 Hz), 46.8, 30.4, 20.0, 13.7.

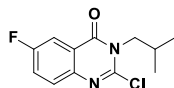

2-Chloro-6-fluoro-3-isobutylquinazolin-4(3*H*)-one (**6d**): white solid, yield 53.4%, m.p. 77-78 °C; <sup>1</sup>H NMR (500 MHz, CDCl<sub>3</sub>) δ: 7.90 – 7.82 (m, 1H), 7.67 – 7.61 (m, 1H), 7.52 – 7.43 (m, 1H), 4.15 (d, *J* = 7.5 Hz, 2H), 2.32 – 2.24 (m, 1H), 1.01 (s, 3H), 0.99 (s, 3H); <sup>13</sup>C NMR (125 MHz, CDCl<sub>3</sub>) δ: 161.4 (d, *J* = 3.3 Hz), 161.1 (d, *J* = 249.5 Hz), 144.5 (d, *J* = 2.2 Hz), 143.1 (d, *J* = 1.6 Hz), 129.1 (d, *J* = 8.3 Hz), 123.5 (d, *J* = 24.2 Hz), 121.7 (d, *J* = 8.7 Hz), 112.4 (d, *J* = 24.0 Hz), 53.3, 28.1, 19.9.

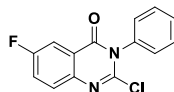

2-Chloro-6-fluoro-3-phenylquinazolin-4(3*H*)-one (**6e**): white solid, yield 74.1%, m.p. 167-168 °C; <sup>1</sup>H NMR (500 MHz, CDCl<sub>3</sub>) δ: 7.87 (dd, *J* = 8.2, 2.9 Hz, 1H), 7.71 (dd, *J* = 8.9, 4.7 Hz, 1H), 7.60 – 7.47 (m, 4H), 7.32 – 7.28 (m, 2H); <sup>13</sup>C NMR (125 MHz, CDCl<sub>3</sub>) δ: 161.3 (d, *J* = 3.2 Hz), 161.2 (d, *J* = 250.7 Hz), 143.7 (d, *J* = 2.2 Hz), 143.3 (d, *J* = 1.9 Hz), 137.0, 129.8, 129.4 (d, *J* = 8.3 Hz), 128.2, 123.7 (d, *J* = 24.1 Hz), 122.1 (d, *J* = 9.0 Hz), 112.6 (d, *J* = 24.0 Hz).

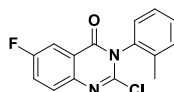

2-Chloro-6-fluoro-3-(*o*-tolyl)quinazolin-4(3*H*)-one (**6f**): white solid, yield 66.0%, m.p. 152-154 °C; <sup>1</sup>H NMR (500 MHz, CDCl<sub>3</sub>) δ: 7.91 (dd, *J* = 8.2, 2.9 Hz, 1H), 7.73 (dd, *J* = 8.9, 4.7 Hz, 1H), 7.55 – 7.51 (m, 1H), 7.47 – 7.34 (m, 3H), 7.20 – 7.16 (m, 1H), 2.17 (s, 3H); <sup>13</sup>C NMR (125 MHz, CDCl<sub>3</sub>) δ: 161.3 (d, *J* = 249.5 Hz), 160.8 (d, *J* = 3.2 Hz), 143.9 (d, *J* = 1.9 Hz), 143.5 (d, *J* = 1.8 Hz), 136.3, 135.6, 131.4, 130.1, 129.4 (d, *J* = 8.3 Hz), 128.2, 127.5, 123.8 (d, *J* = 24.1 Hz), 122.0 (d, *J* = 8.9 Hz), 112.7 (d, *J* = 23.9 Hz), 17.4.

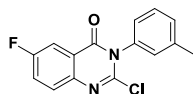

2-Chloro-6-fluoro-3-(*m*-tolyl)quinazolin-4(3*H*)-one (**6g**): white solid, yield 52.8%, m.p. 157-158 °C; <sup>1</sup>H NMR (500 MHz, CDCl<sub>3</sub>) δ: 7.89 (dd, *J* = 8.2, 2.9 Hz, 1H), 7.71 (dd, *J* = 8.9, 4.7 Hz, 1H), 7.55 – 7.49 (m, 1H), 7.44 (t, *J* = 7.6 Hz, 1H), 7.34 (d, *J* = 7.7 Hz, 1H), 7.09 (d, *J* = 8.1 Hz, 2H), 2.44 (s, 3H); <sup>13</sup>C NMR (125 MHz, CDCl<sub>3</sub>) δ: 161.4 (d, *J* = 3.5 Hz), 161.2 (d, *J* = 250.7 Hz), 143.8 (d, *J* = 2.4 Hz), 143.3 (d, *J* = 1.5 Hz), 140.0, 136.9, 130.7, 129.6, 129.4 (d, *J* = 8.3 Hz), 128.6, 125.1, 123.7 (d, *J* = 24.1 Hz), 122.1 (d, *J* = 9.1 Hz), 112.6 (d, *J* = 24.1 Hz), 21.3.

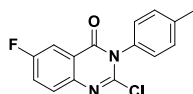



2-Chloro-6-fluoro-3-(*p*-tolyl)quinazolin-4(3*H*)-one (**6h**): white solid, yield 65.4%, m.p. 159-160 °C; <sup>1</sup>H NMR (500 MHz, CDCl<sub>3</sub>) δ: 7.90 – 7.86 (m, 1H), 7.70 (dd, *J* = 8.9, 4.8 Hz, 1H), 7.54 – 7.48 (m, 1H), 7.36 (d, *J* = 8.0 Hz, 2H), 7.16 (d, *J* = 8.3 Hz, 2H), 2.45 (s, 3H); <sup>13</sup>C NMR (125 MHz, CDCl<sub>3</sub>) δ: 161.4 (d, *J* = 3.1 Hz), 161.2 (d, *J* = 250.7 Hz), 144.0 (d, *J* = 2.3 Hz), 143.3 (d, *J* = 2.1 Hz), 140.0, 134.5, 130.5, 129.4 (d, *J* = 8.3 Hz), 127.9, 123.7 (d, *J* = 24.2 Hz), 122.1 (d, *J* = 9.0 Hz), 112.6 (d, *J* = 24.0 Hz), 21.3.

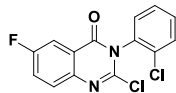

2-Chloro-3-(2-chlorophenyl)-6-fluoroquinazolin-4(3*H*)-one (**6i**): white solid, yield 45.5%, m.p. 158-160 °C; <sup>1</sup>H NMR (500 MHz, CDCl<sub>3</sub>) δ: 7.91 (dd, *J* = 8.1, 2.9 Hz, 1H), 7.74 (dd, *J* = 8.9, 4.7 Hz, 1H), 7.62 (dd, *J* = 7.8, 1.7 Hz, 1H), 7.58 – 7.45 (m, 3H), 7.37 (dd, *J* = 7.6, 1.8 Hz, 1H); <sup>13</sup>C NMR (125 MHz, CDCl<sub>3</sub>) δ: 161.3 (d, *J* = 250.7 Hz), 160.5 (d, *J* = 3.4 Hz), 143.4 (d, *J* = 1.9 Hz), 143.0 (d, *J* = 2.2 Hz), 134.8, 132.8, 131.3, 130.6, 130.0, 129.5 (d, *J* = 8.3 Hz), 128.2, 123.9 (d, *J* = 24.0 Hz), 121.9 (d, *J* = 8.7 Hz), 112.8 (d, *J* = 24.1 Hz).

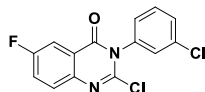

2-Chloro-3-(3-chlorophenyl)-6-fluoroquinazolin-4(3*H*)-one (**6j**): white solid, yield 53.4%, m.p. 172-175 °C; <sup>1</sup>H NMR (500 MHz, CDCl<sub>3</sub>) δ: 7.88 (dd, *J* = 8.1, 2.9 Hz, 1H), 7.72 (dd, *J* = 8.9, 4.7 Hz, 1H), 7.57 – 7.48 (m, 3H), 7.33 (t, *J* = 1.8 Hz, 1H), 7.21 (dt, *J* = 7.1, 1.8 Hz, 1H); <sup>13</sup>C NMR (125 MHz, CDCl<sub>3</sub>) δ: 161.3 (d, *J* = 250.7 Hz), 161.1 (d, *J* = 3.4 Hz), 143.2 (d, *J* = 1.8 Hz), 142.9 (d, *J* = 2.3 Hz), 137.9, 135.4, 130.8, 130.2, 129.5 (d, *J* = 8.3 Hz), 128.8, 126.7, 123.9 (d, *J* = 24.3 Hz), 121.9 (d, *J* = 8.5 Hz), 112.7 (d, *J* = 24.0 Hz).

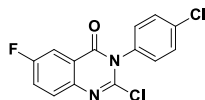

2-Chloro-3-(4-chlorophenyl)-6-fluoroquinazolin-4(3*H*)-one (**6k**): white solid, yield 36.8%, m.p. 165-166 °C; <sup>1</sup>H NMR (500 MHz, CDCl<sub>3</sub>) δ: 7.88 (dd, *J* = 8.1, 2.9 Hz, 1H), 7.72 (dd, *J* = 8.9, 4.7 Hz, 1H), 7.57 – 7.51 (m, 3H), 7.25 – 7.21 (m, 2H); <sup>13</sup>C NMR (125 MHz, CDCl<sub>3</sub>) δ: 161.3 (d, *J* = 250.7 Hz), 161.2 (d, *J* = 3.5 Hz), 143.2 (d, *J* = 2.3 Hz), 143.1 (d, *J* = 2.5 Hz), 136.0, 135.4, 130.1, 129.7, 129.5 (d, *J* = 8.3 Hz), 123.9 (d, *J* = 24.1 Hz), 121.9 (d, *J* = 8.9 Hz), 112.7 (d, *J* = 24.0 Hz).

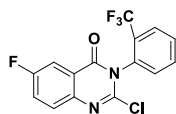

2-Chloro-6-fluoro-3-(2-(trifluoromethyl)phenyl)quinazolin-4(3*H*)-one (**6l**): white solid, yield 37.0%, m.p. 166-169 °C; <sup>1</sup>H NMR (500 MHz, CDCl<sub>3</sub>) δ: 7.91 – 7.86 (m, 2H), 7.80 – 7.77 (m, 1H), 7.75 – 7.68 (m, 2H), 7.56 – 7.52 (m, 1H), 7.41 (d, *J* = 7.8 Hz, 1H); <sup>13</sup>C NMR (125 MHz, CDCl<sub>3</sub>) δ: 161.4 (d, *J* = 250.7 Hz), 161.1 (d, *J* = 3.2 Hz), 143.3 (d, *J* = 1.8 Hz), 142.9 (d, *J* = 2.1 Hz), 134.7 (d, *J* = 1.6 Hz), 133.6, 130.9, 130.6, 129.6 (d, *J* = 8.3 Hz), 128.4, 128.2, 127.9 (dd, *J* = 9.3, 4.6 Hz), 127.7, 126.0, 123.9 (d, *J* = 24.0 Hz), 123.8, 121.7, 121.7 (d, *J* = 3.6 Hz), 119.5, 112.8 (d, *J* = 24.4 Hz).

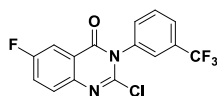

2-Chloro-6-fluoro-3-(3-(trifluoromethyl)phenyl)quinazolin-4(3*H*)-one (**6m**): white solid, yield 60.6%, m.p. 155-158 °C; <sup>1</sup>H NMR (500 MHz, CDCl<sub>3</sub>) δ: 7.88 (dd, *J* = 8.1, 2.9 Hz, 1H), 7.82 (d, *J* = 7.9 Hz, 1H), 7.76 – 7.70 (m, 2H), 7.60 (s, 1H), 7.58 – 7.49 (m, 2H); <sup>13</sup>C NMR (125 MHz, CDCl<sub>3</sub>) δ: 161.4 (d, *J* = 252.0 Hz), 161.1 (d, *J* = 3.4 Hz), 143.2 (d, *J* = 1.8 Hz), 142.7 (d, *J* = 2.2 Hz), 137.4, 132.5 (q, *J* = 33.4 Hz), 131.9, 130.5, 129.6 (d, *J* = 8.3 Hz), 126.8 (q, *J* = 3.6 Hz), 125.7 (q, *J* = 3.7 Hz), 124.1 (d, *J* = 24.3 Hz), 123.3 (q, *J* = 273.4 Hz), 121.9 (d, *J* = 9.0 Hz), 112.7 (d, *J* = 24.0 Hz).

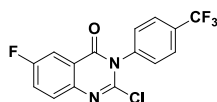

2-Chloro-6-fluoro-3-(4-(trifluoromethyl)phenyl)quinazolin-4(3*H*)-one (**6n**): white solid, yield 50.3%, m.p. 180-182 °C; <sup>1</sup>H NMR (500 MHz, CDCl<sub>3</sub>) δ: 7.90 – 7.83 (m, 3H), 7.73 (dd, *J* = 8.9, 4.7 Hz, 1H), 7.57 – 7.52 (m, 1H), 7.45 (d, *J* = 8.3 Hz, 2H); <sup>13</sup>C NMR (125 MHz, CDCl<sub>3</sub>) δ: 161.4 (d, *J* = 250.7 Hz), 161.1 (d, *J* = 3.4 Hz), 143.2 (d, *J* = 2.2 Hz), 142.5 (d, *J* = 2.4 Hz), 139.9, 132.1 (q, *J* = 33.1 Hz), 129.6 (d, *J* = 8.4 Hz), 129.1, 127.1 (q, *J* = 3.6 Hz), 124.1 (d, *J* = 24.3 Hz), 123.5 (q, *J* = 273.4 Hz), 121.9 (d, *J* = 9.0 Hz), 112.7 (d, *J* = 24.0 Hz).

**The <sup>1</sup>H NMR and <sup>13</sup>C NMR Spectrum of intermediates 2a-2o, 3a-3o, 5a-5n, and 6a-6n**

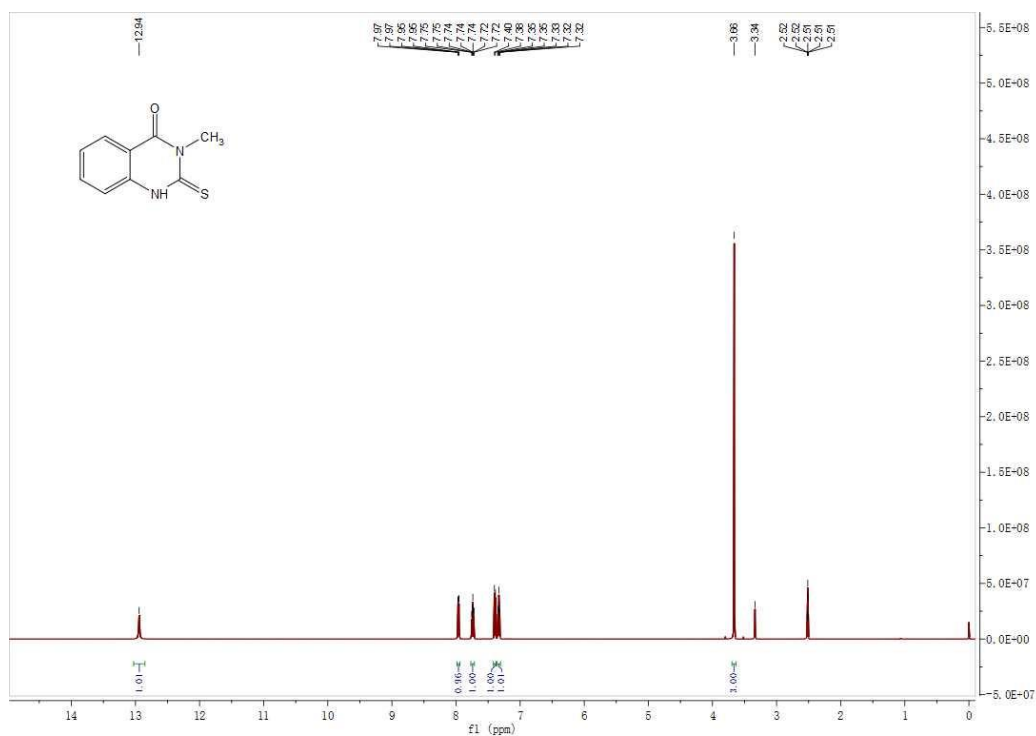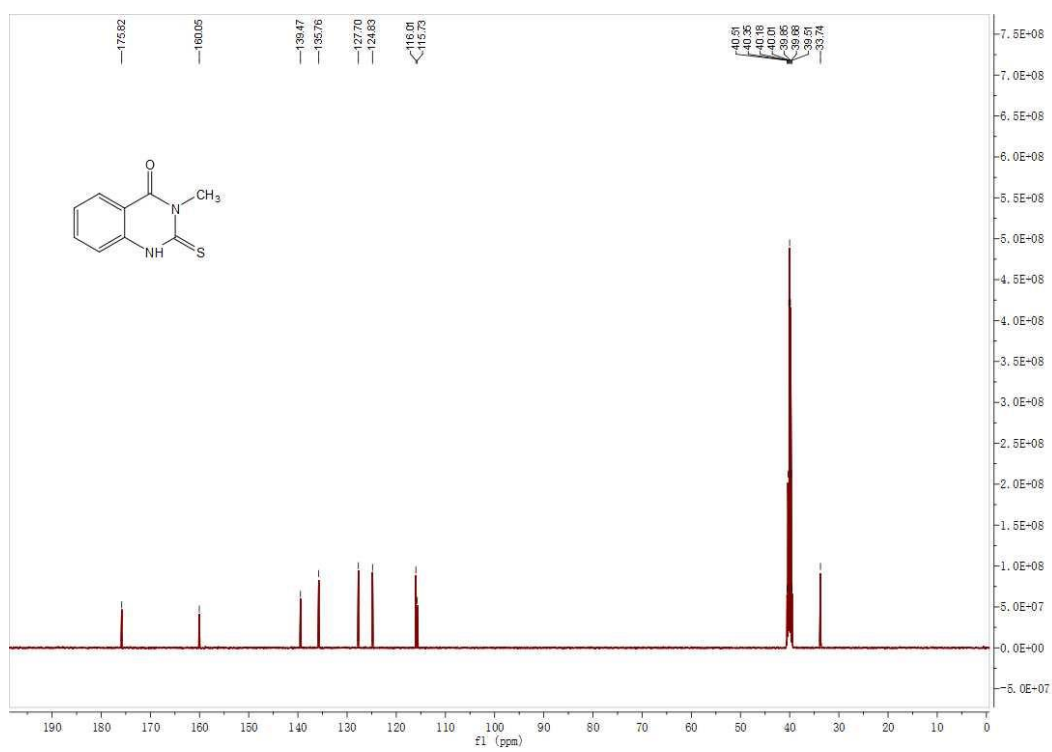

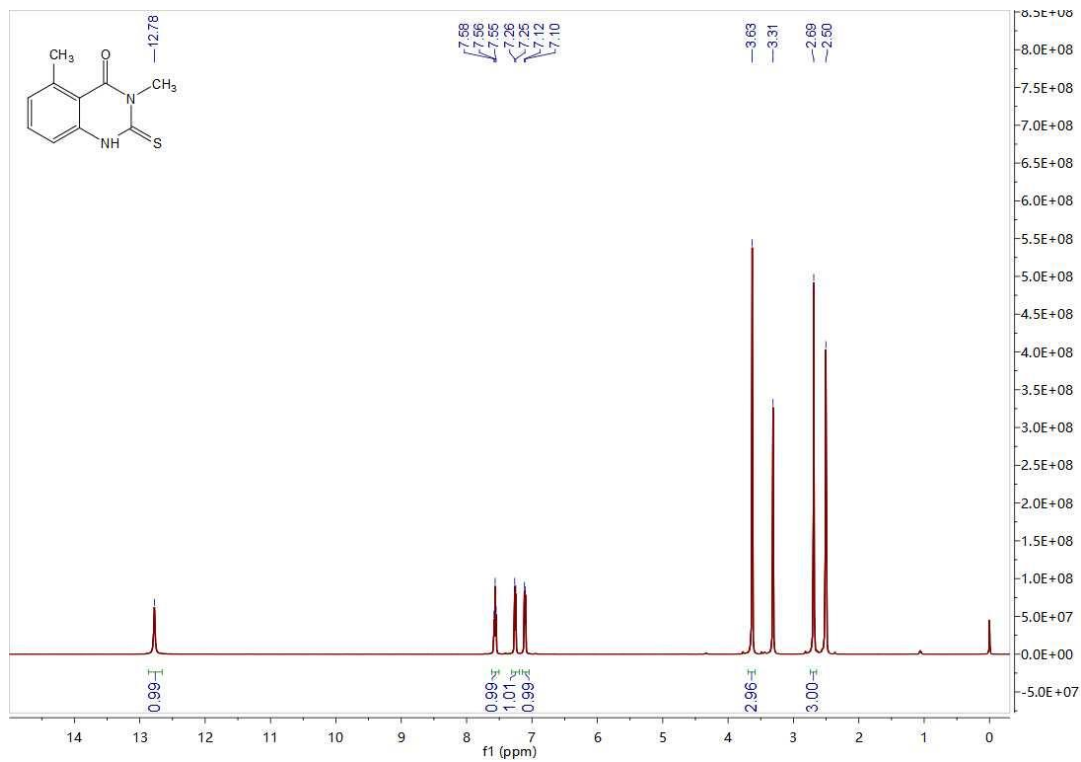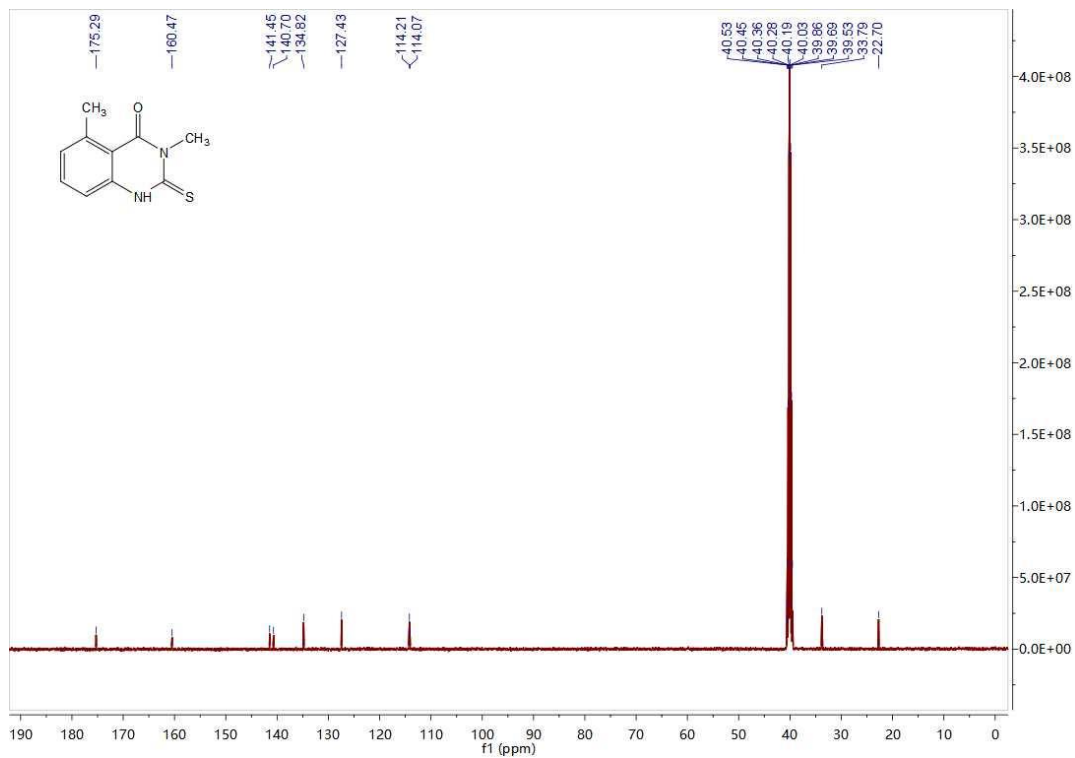

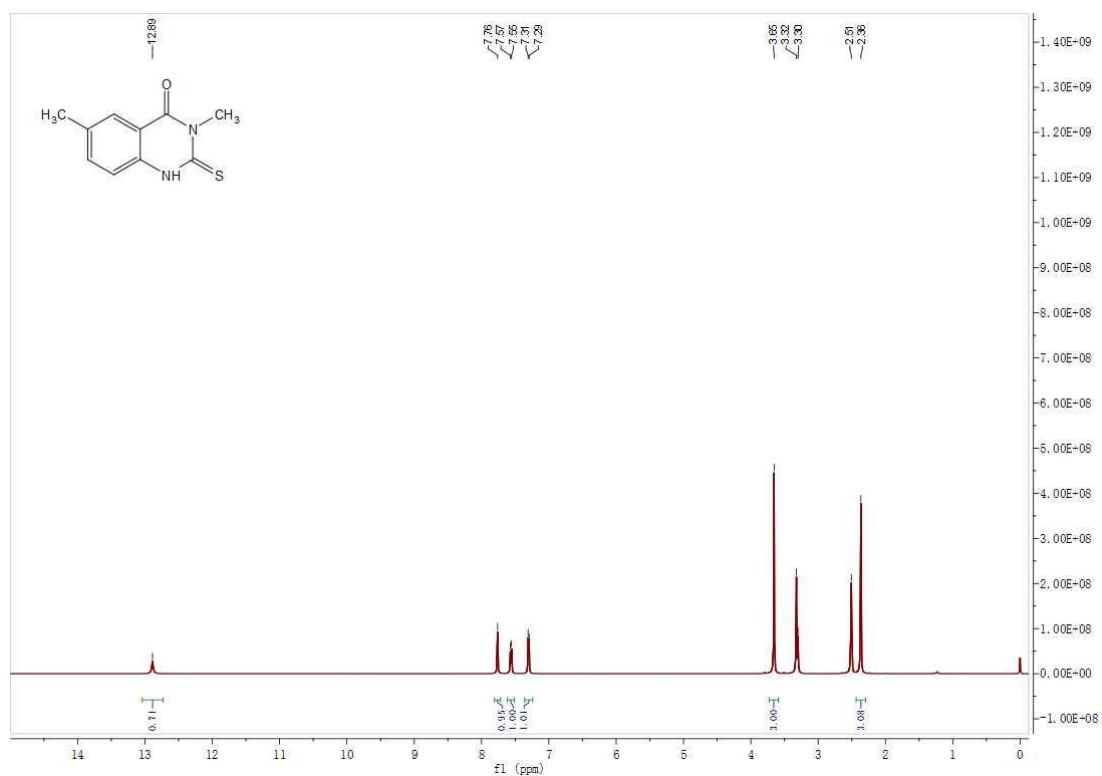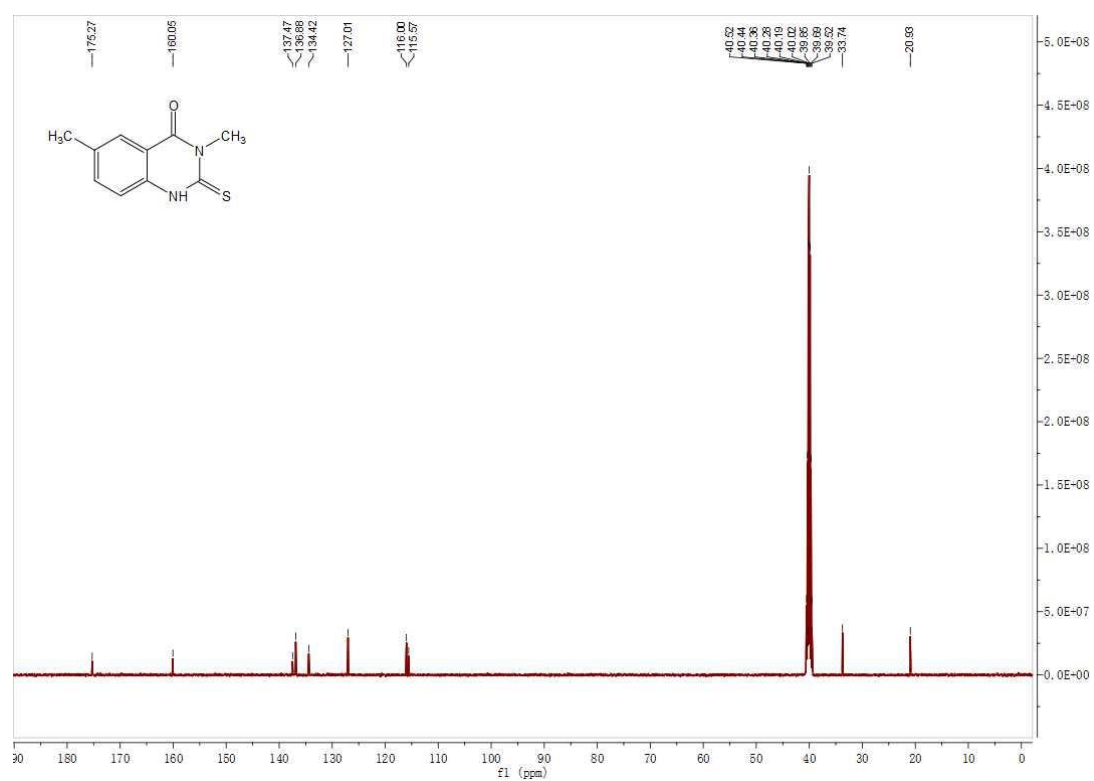

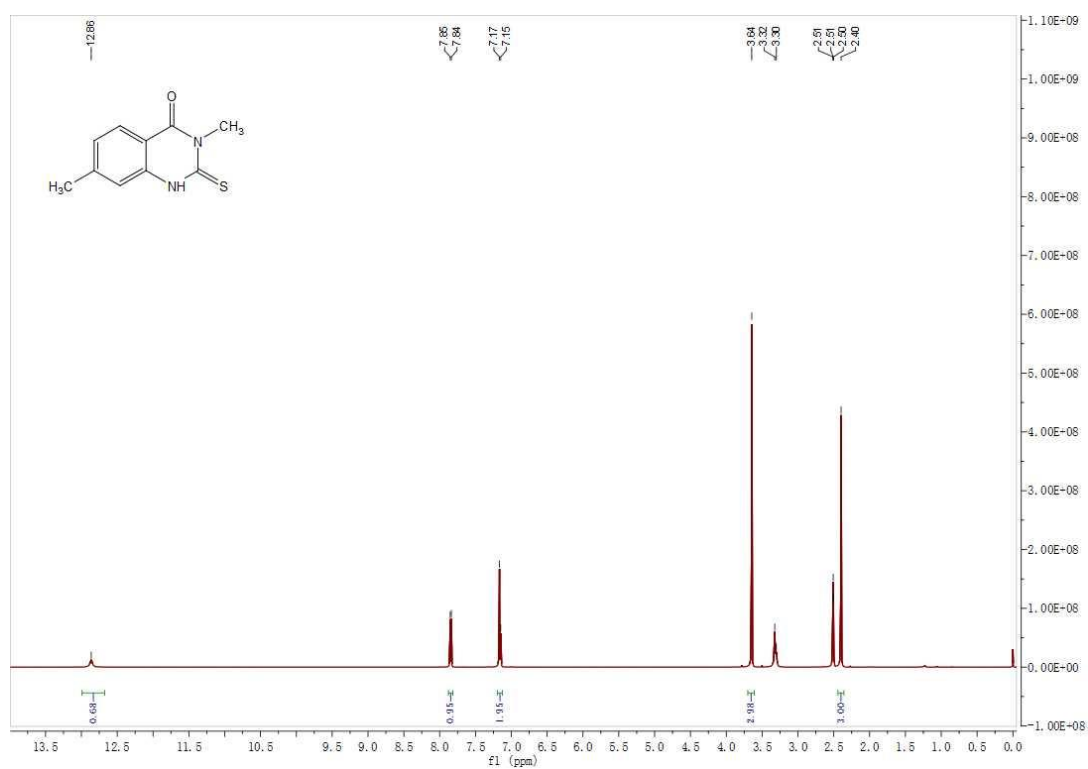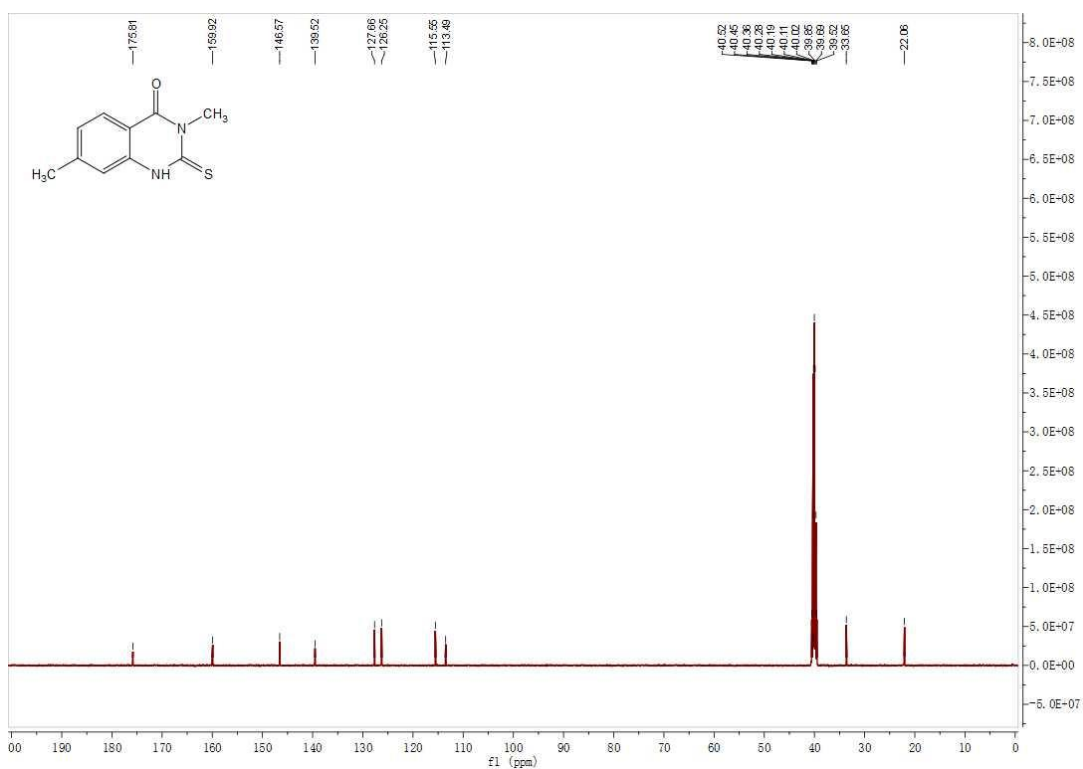

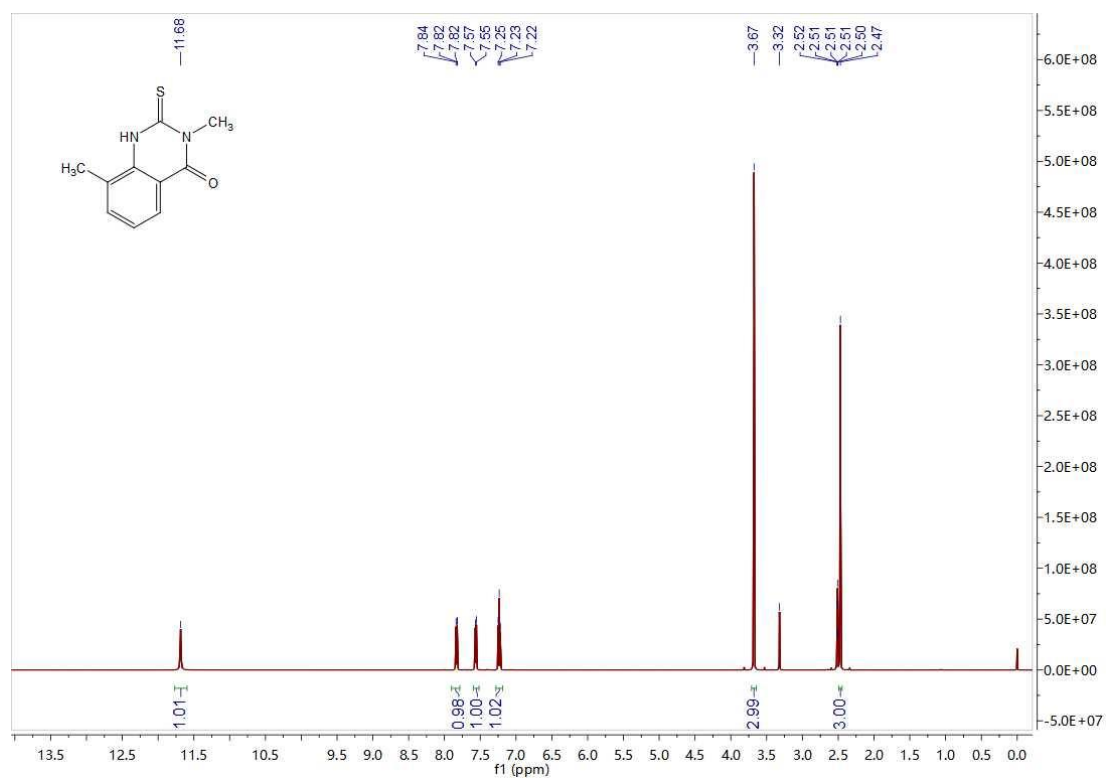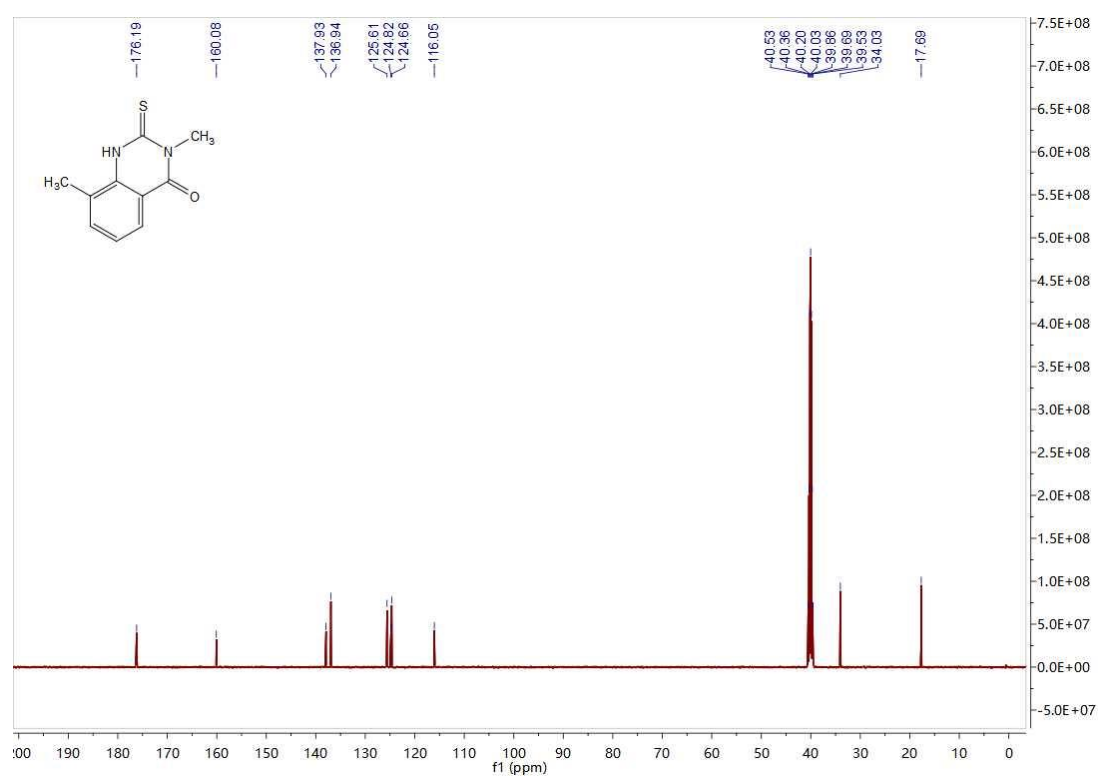

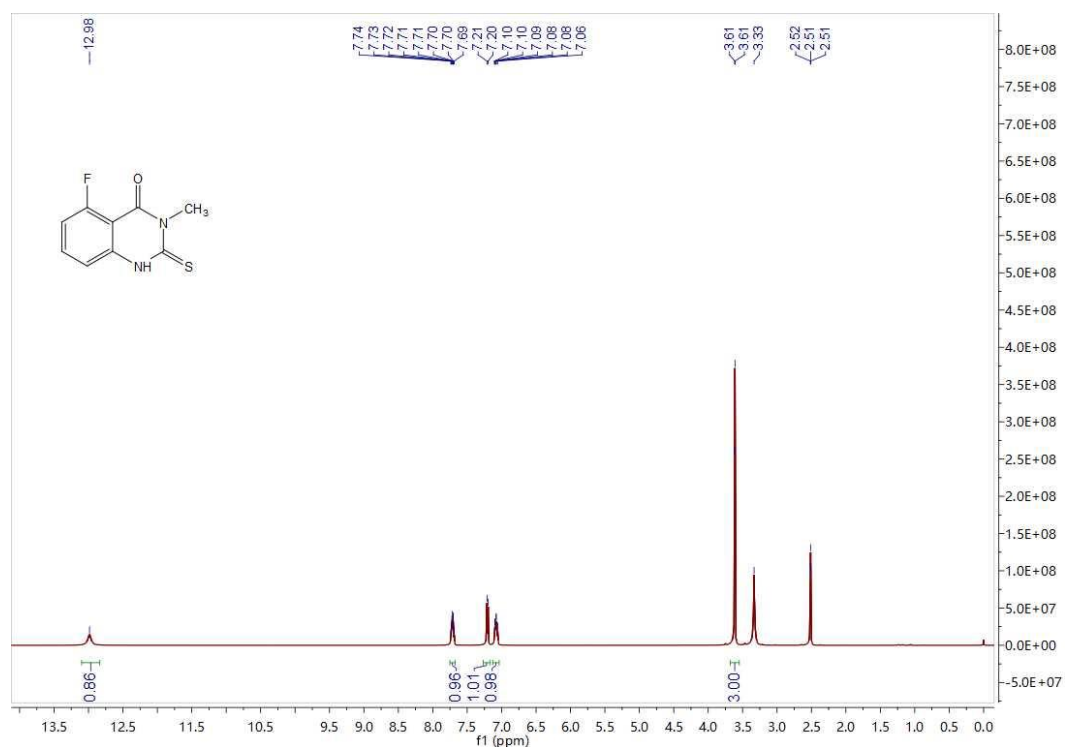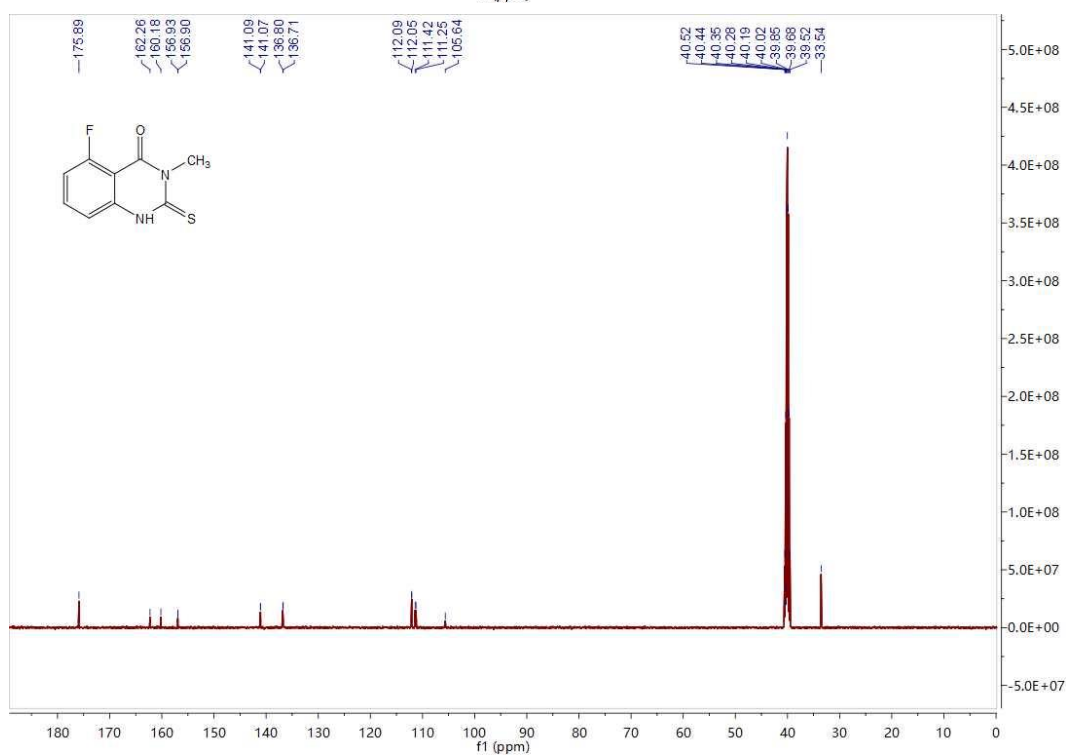



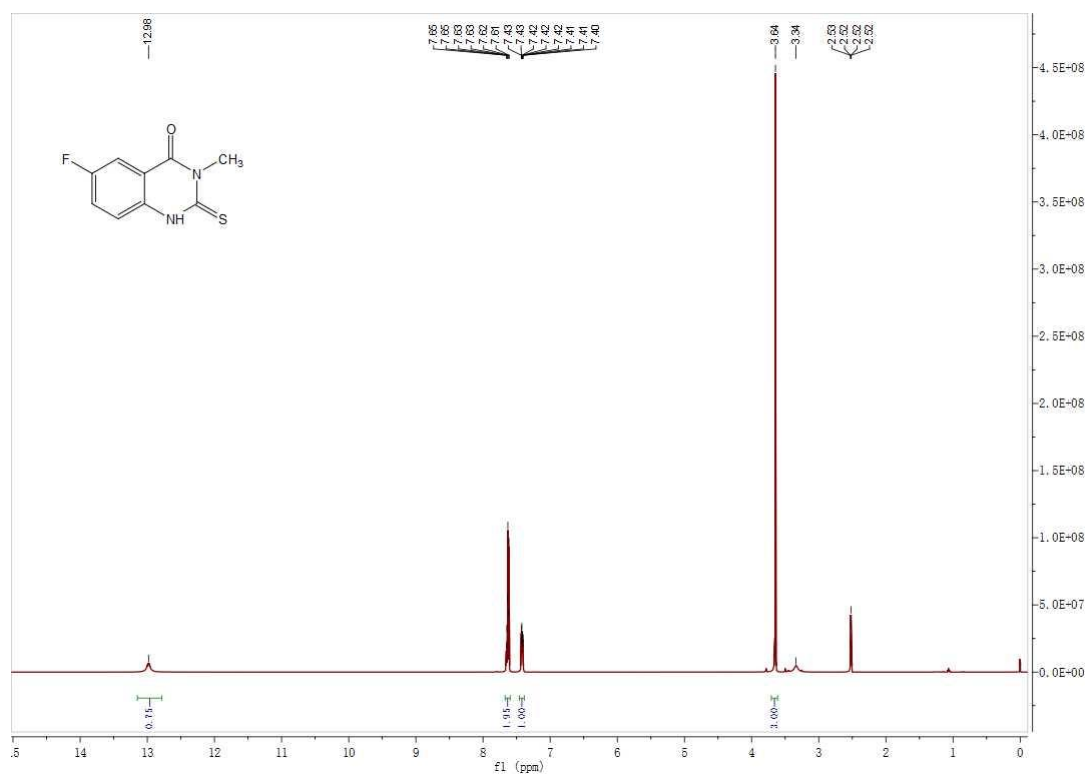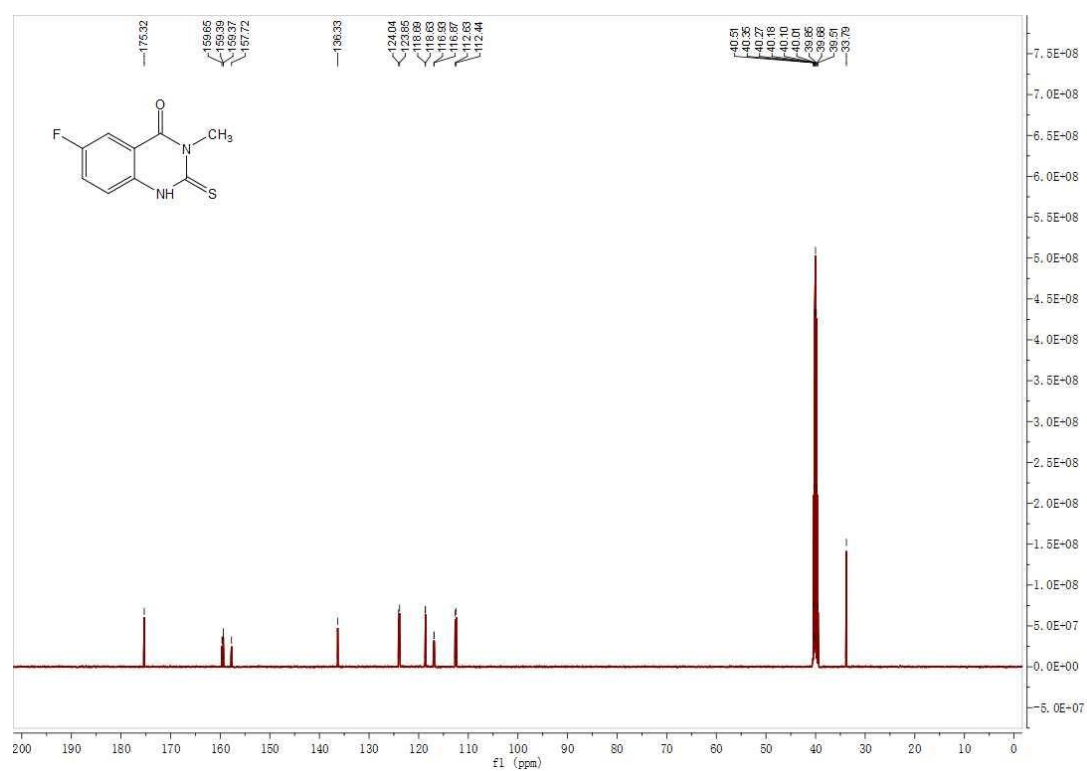

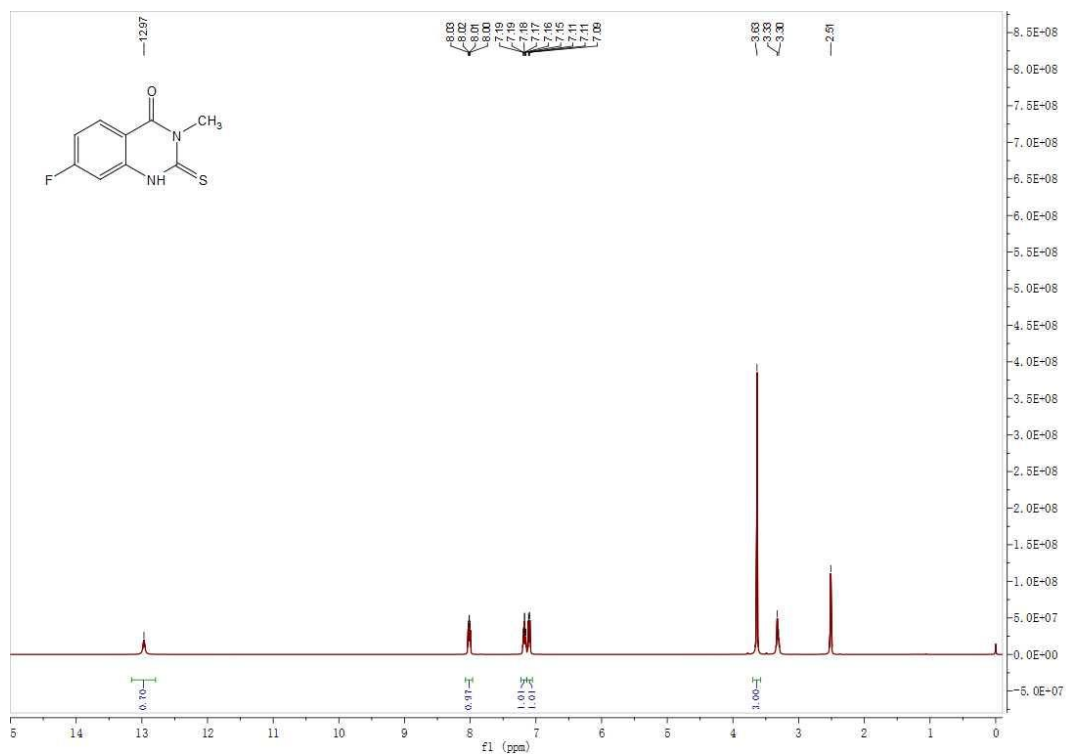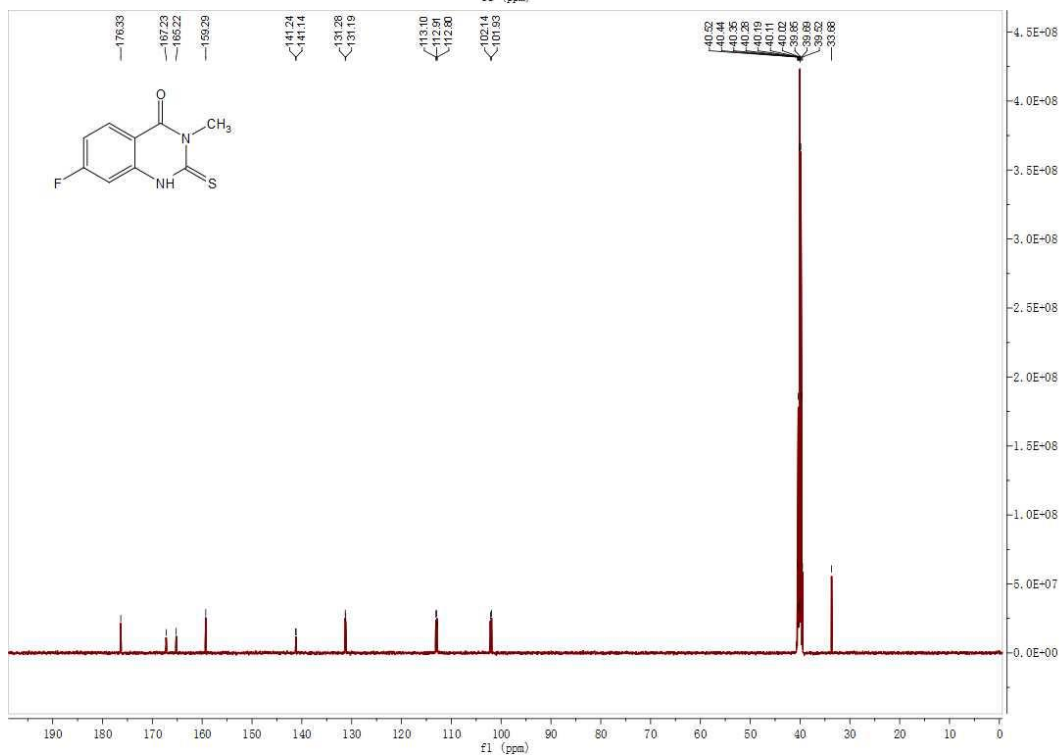

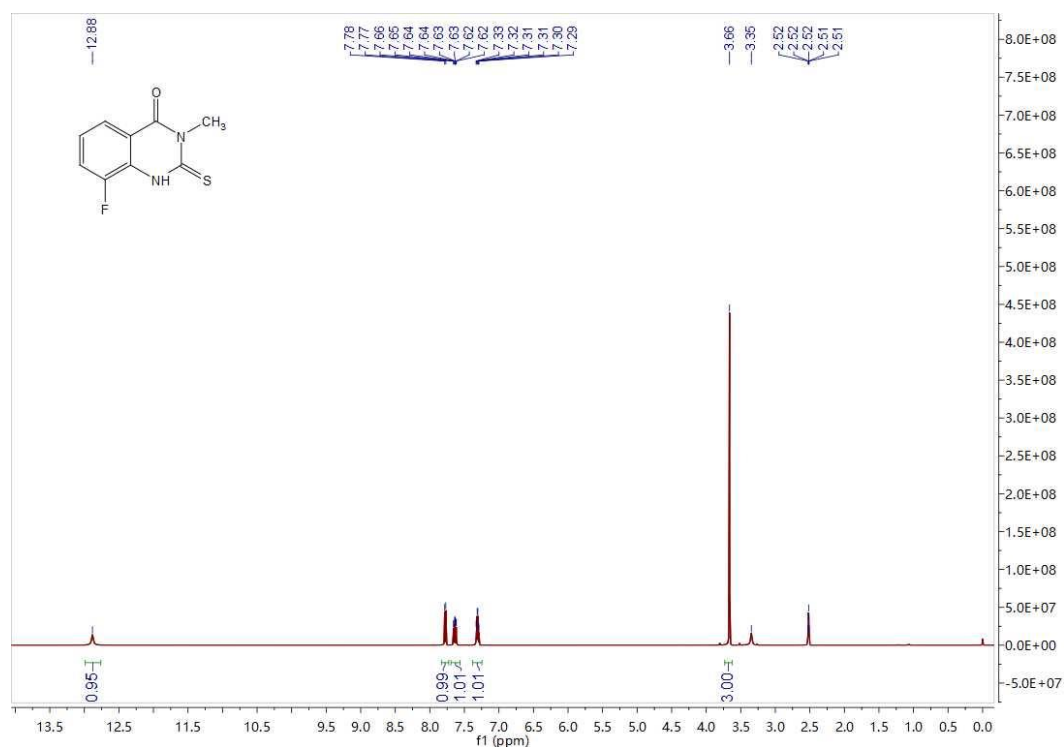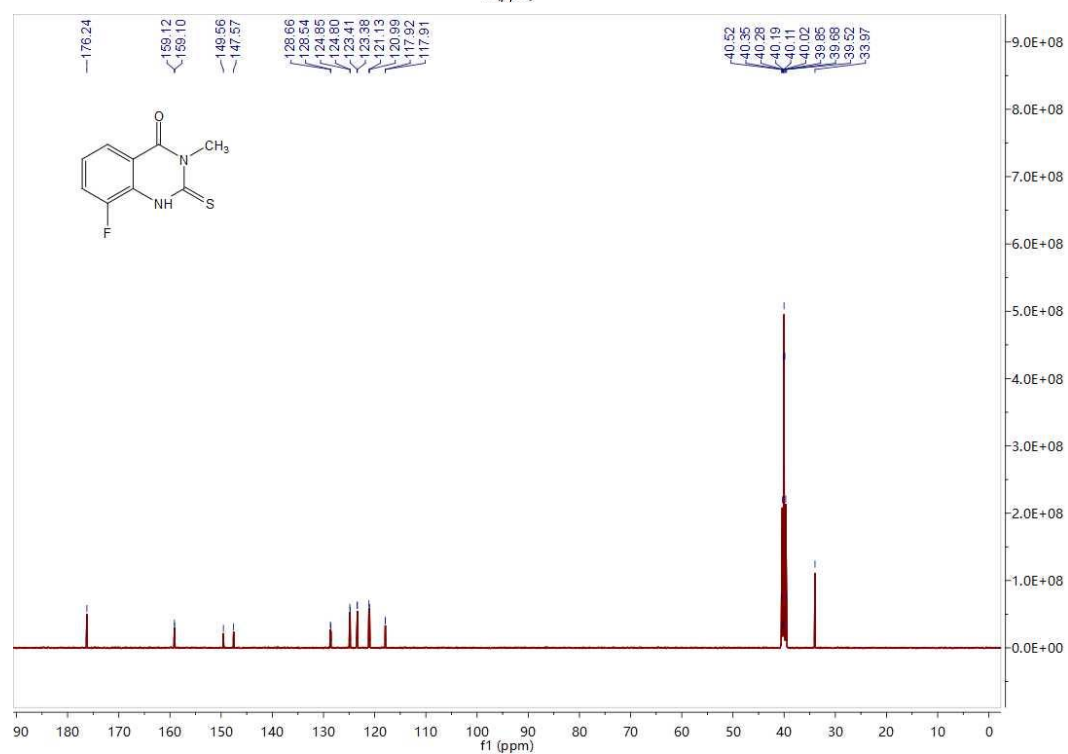

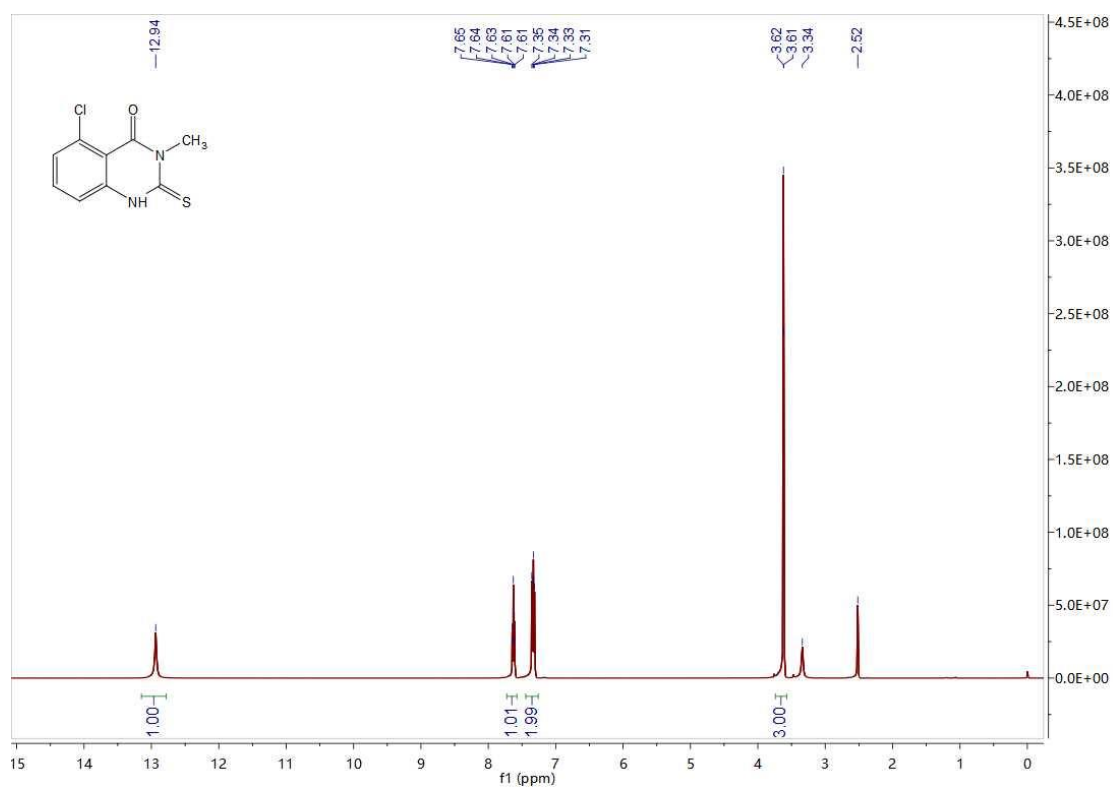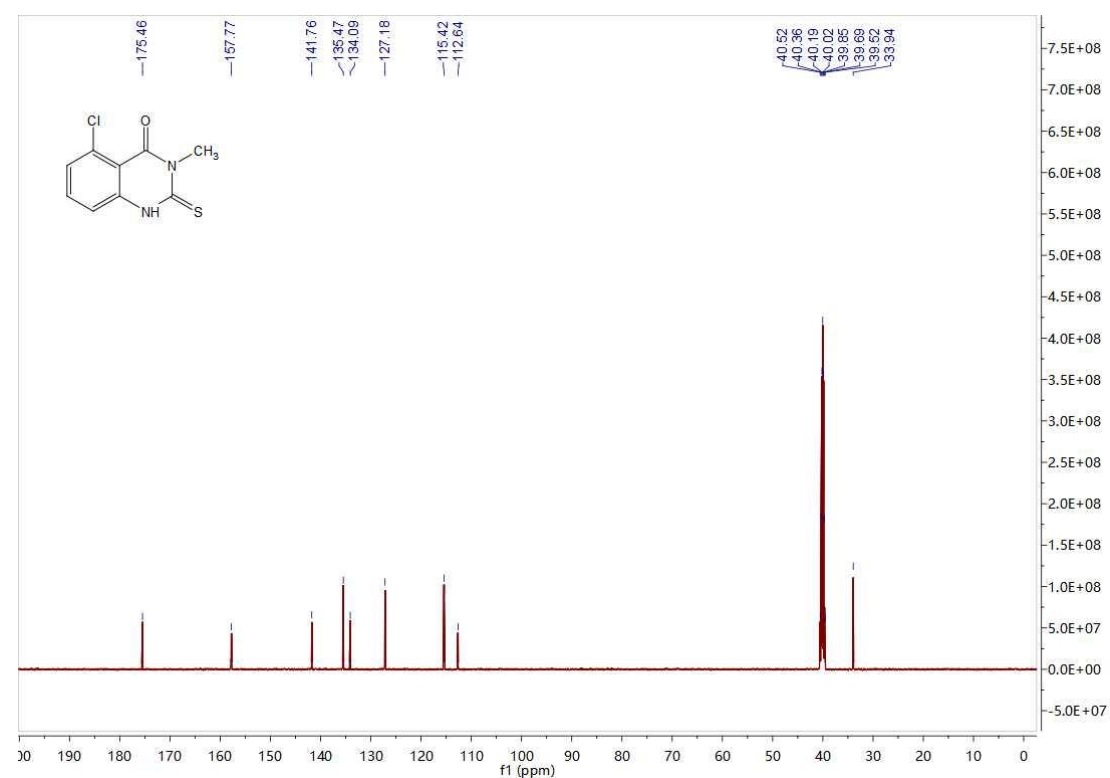

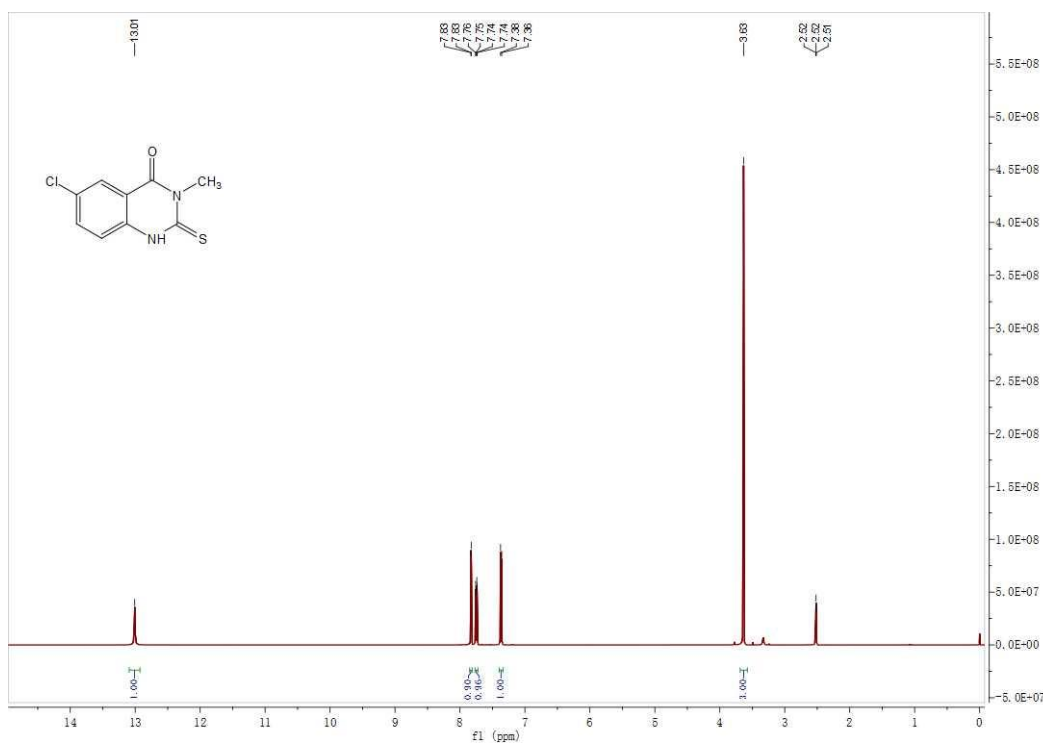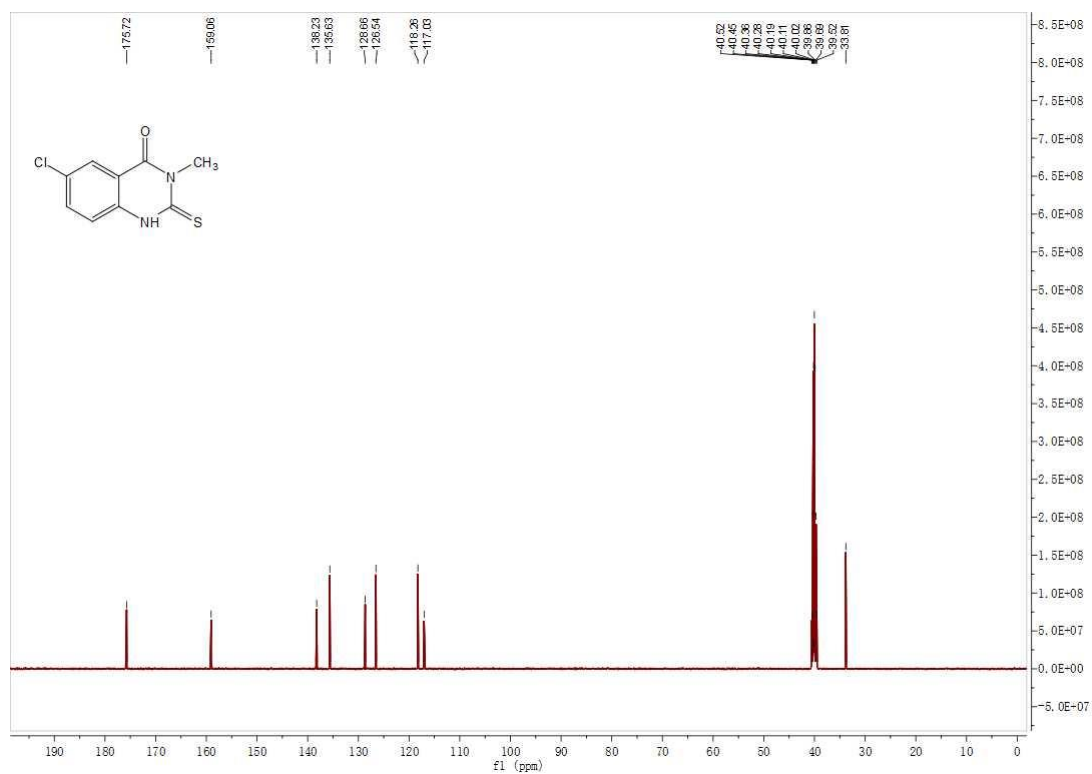

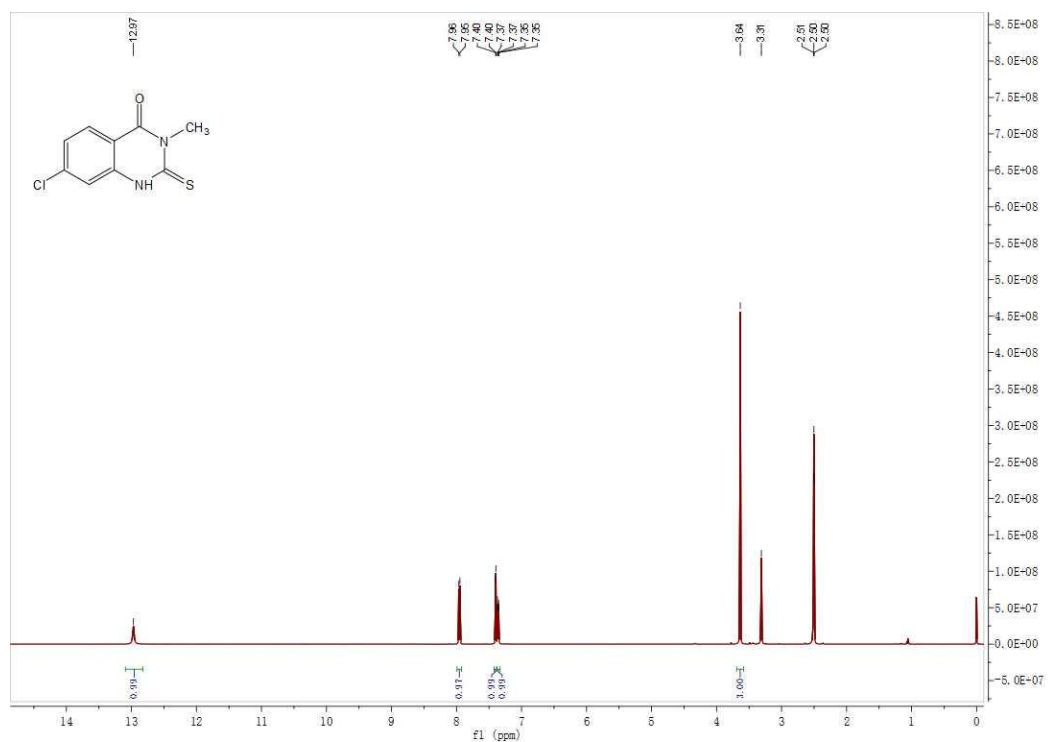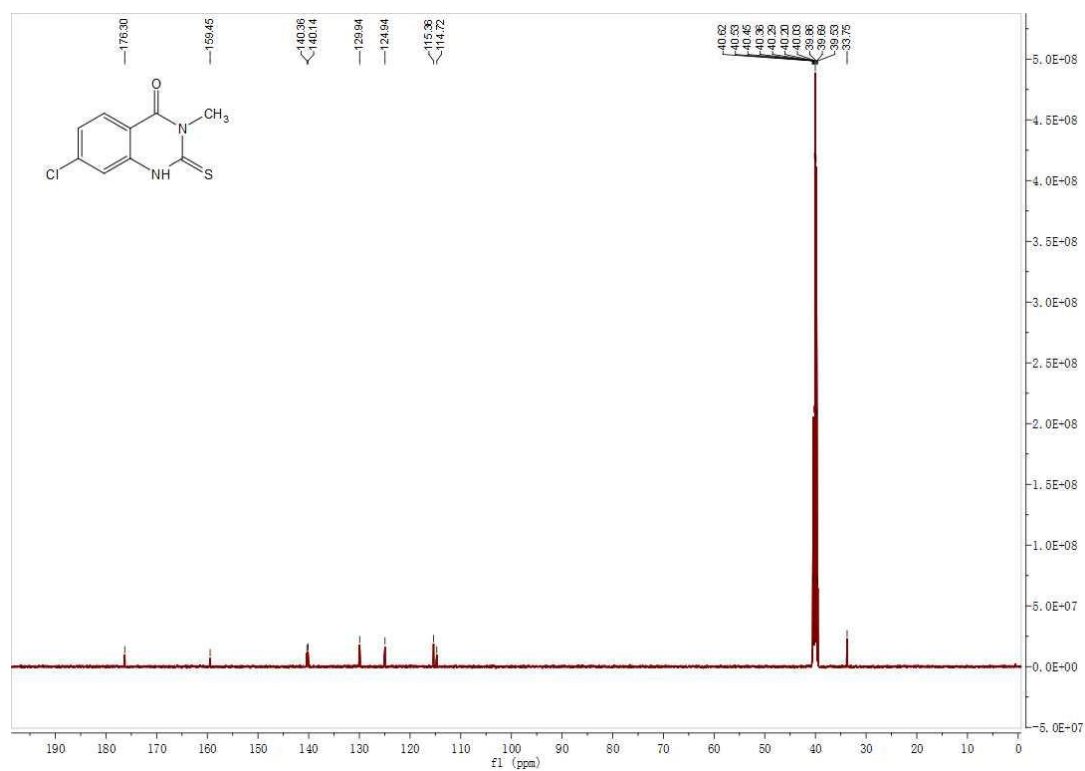

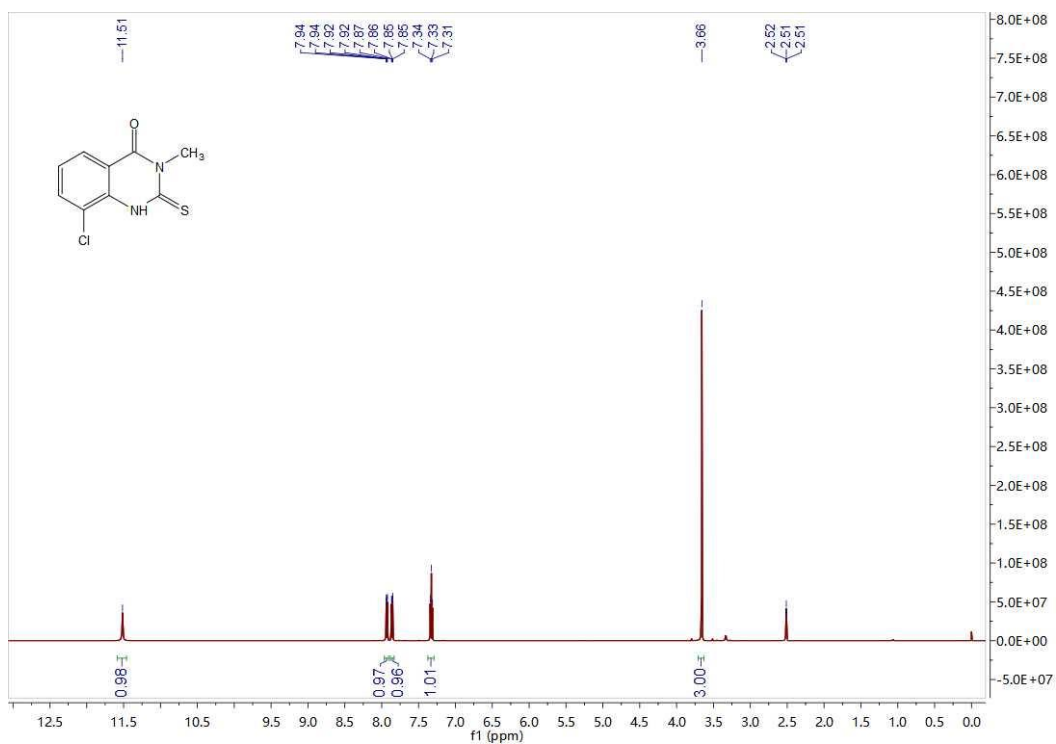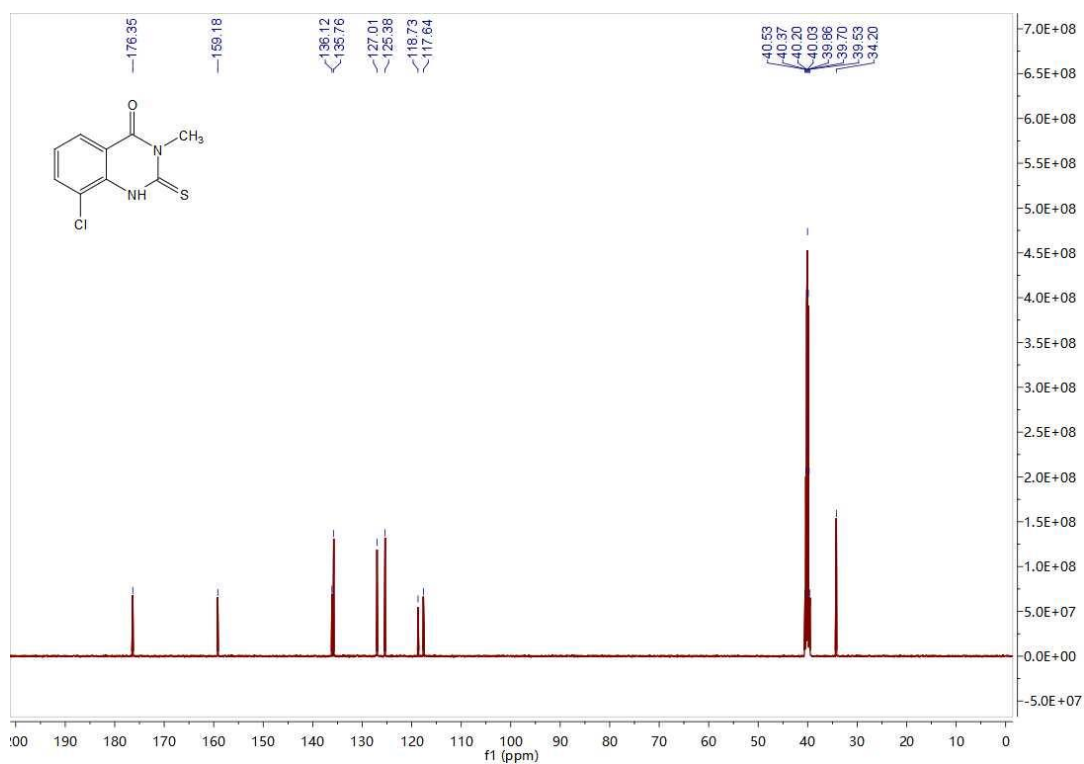

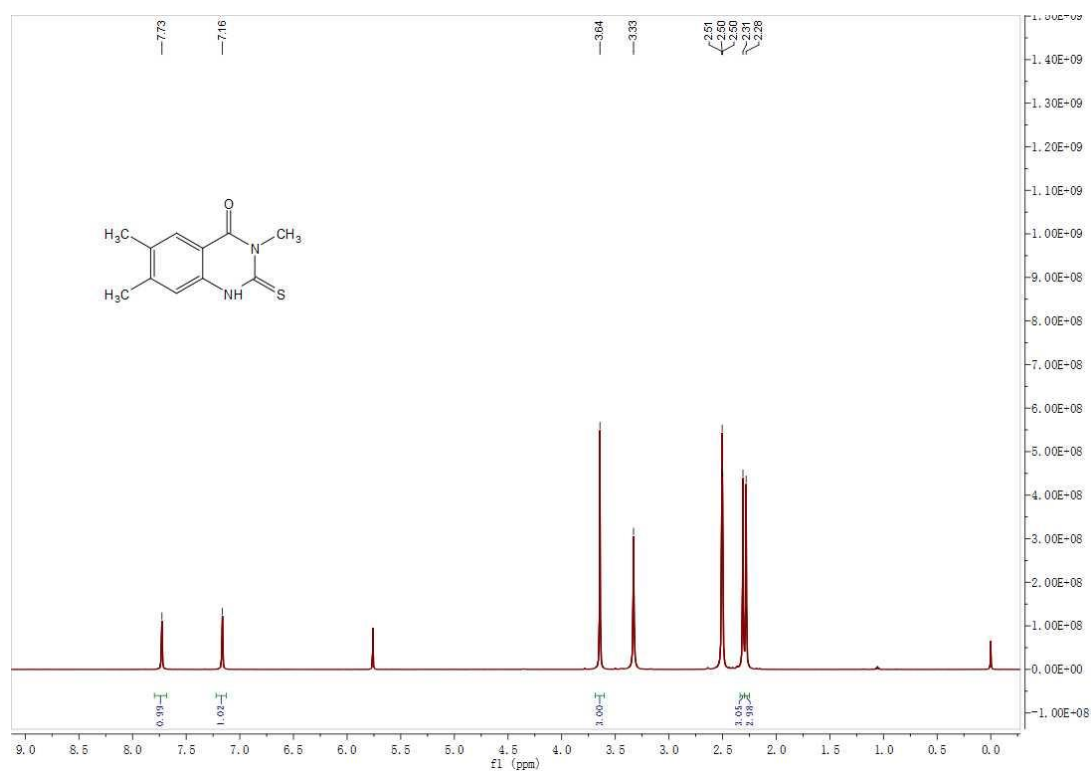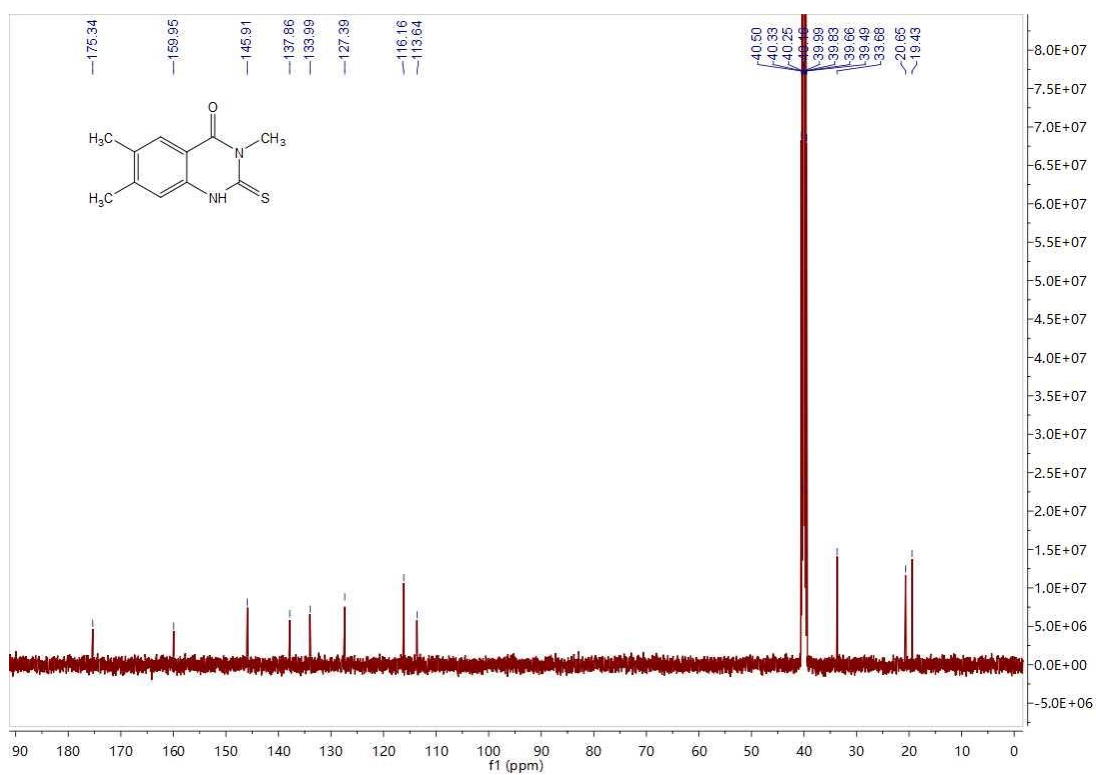



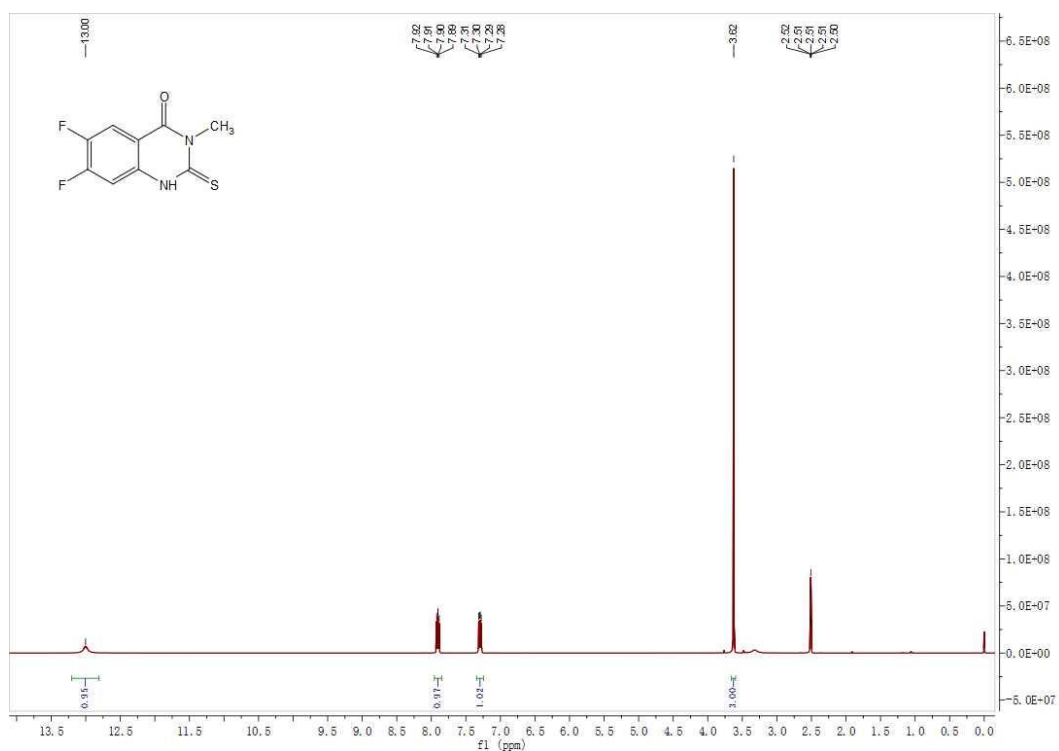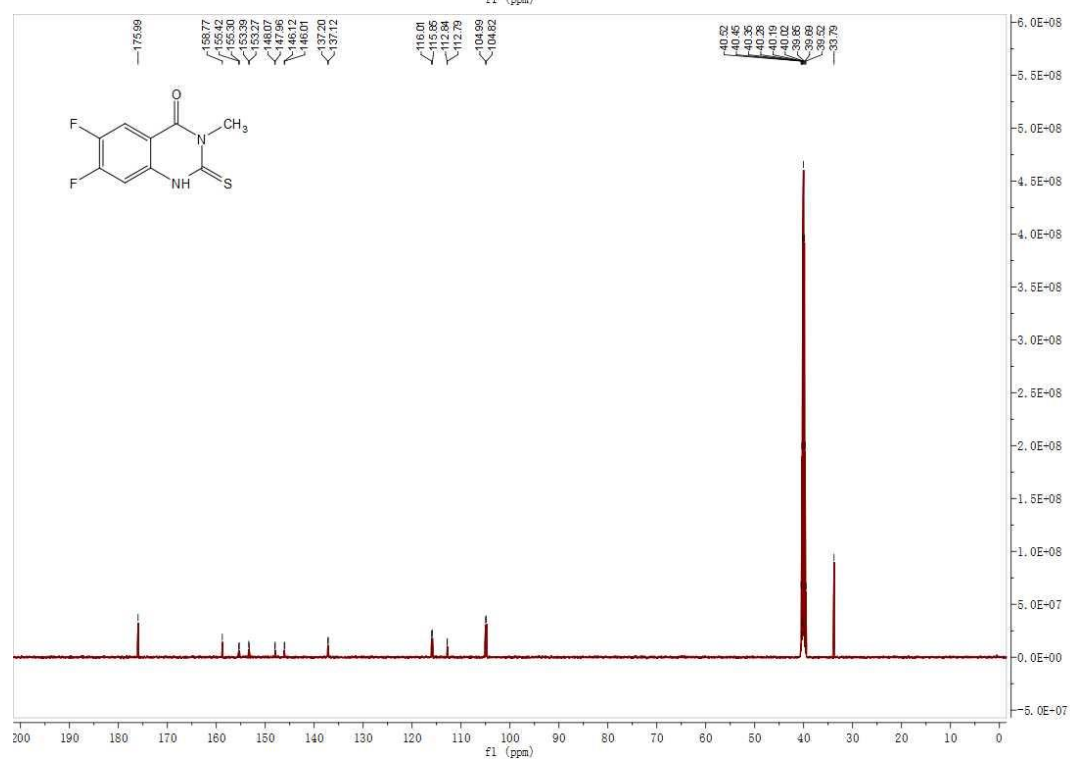

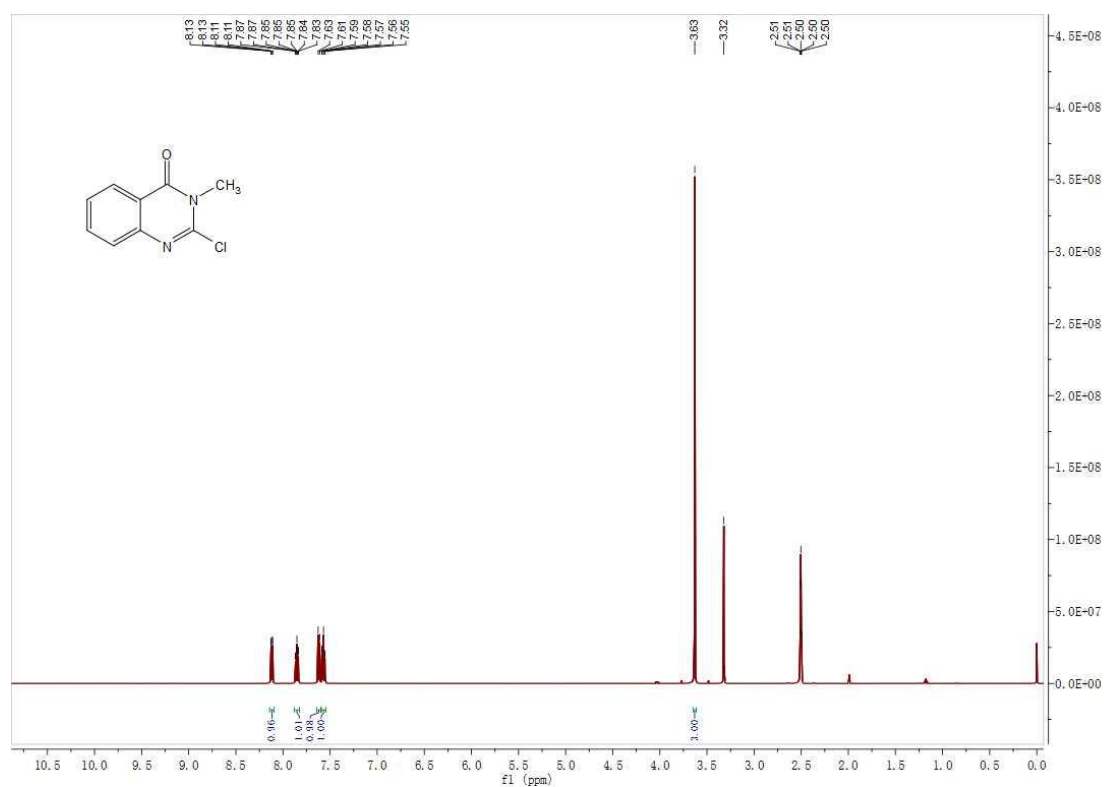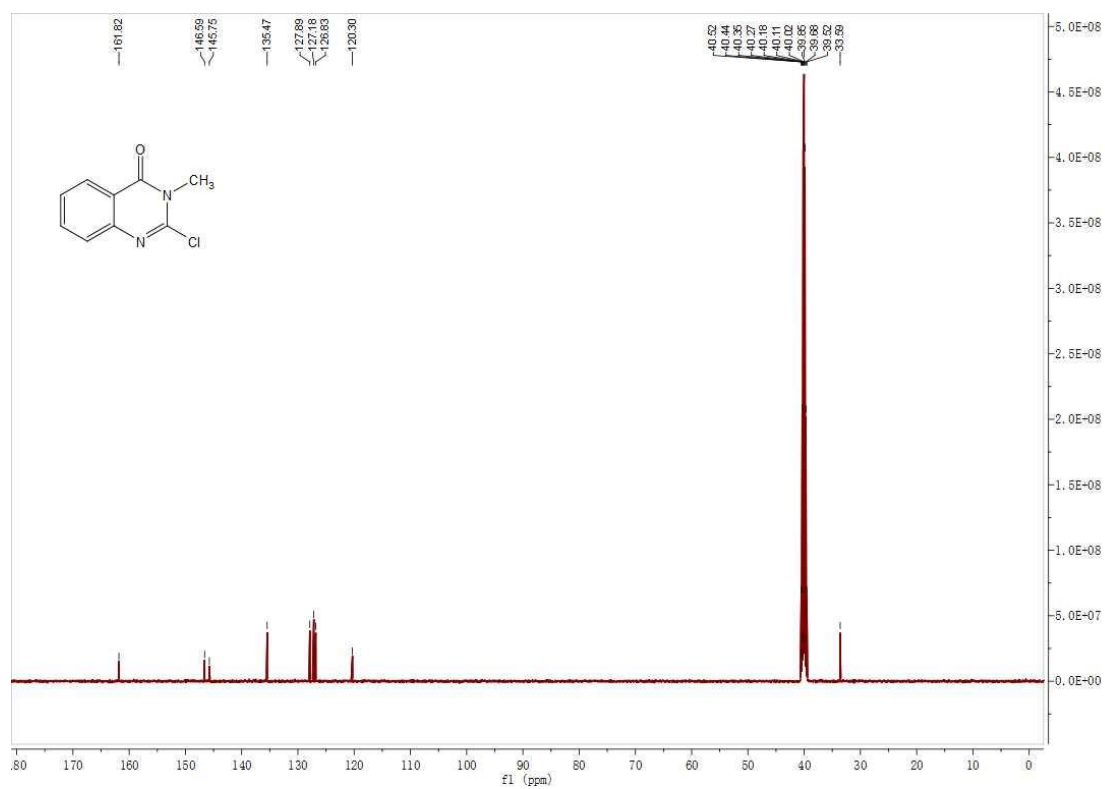

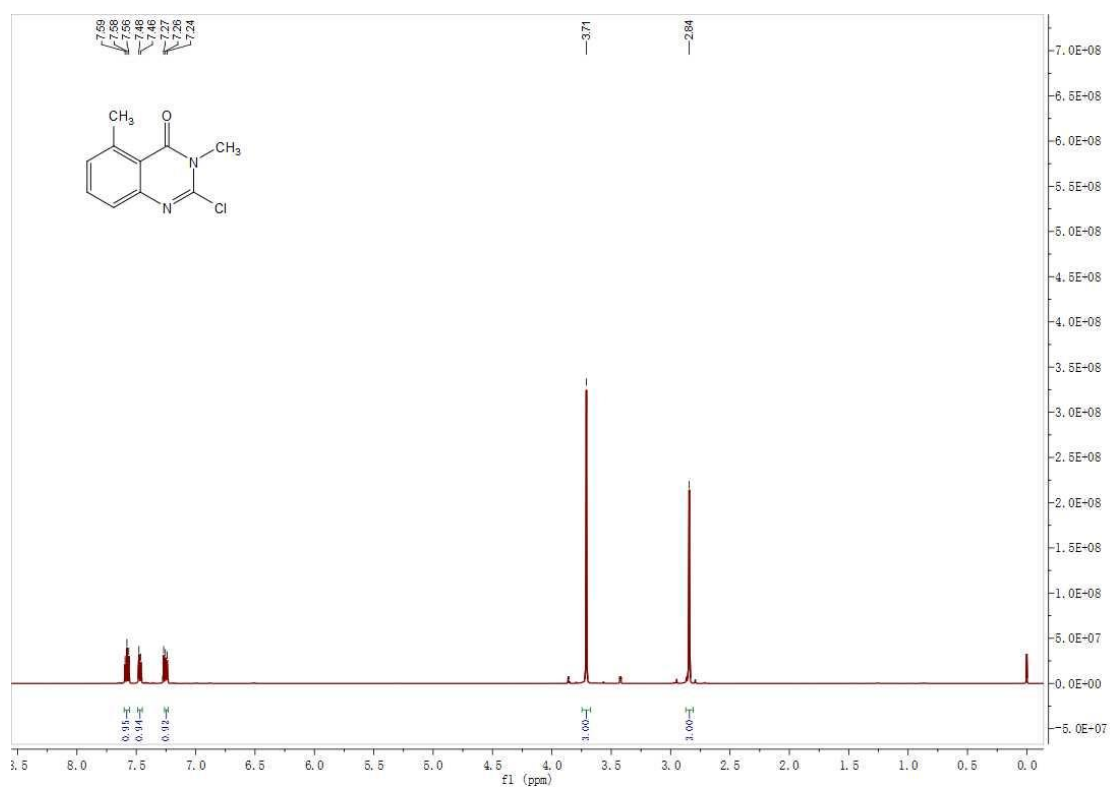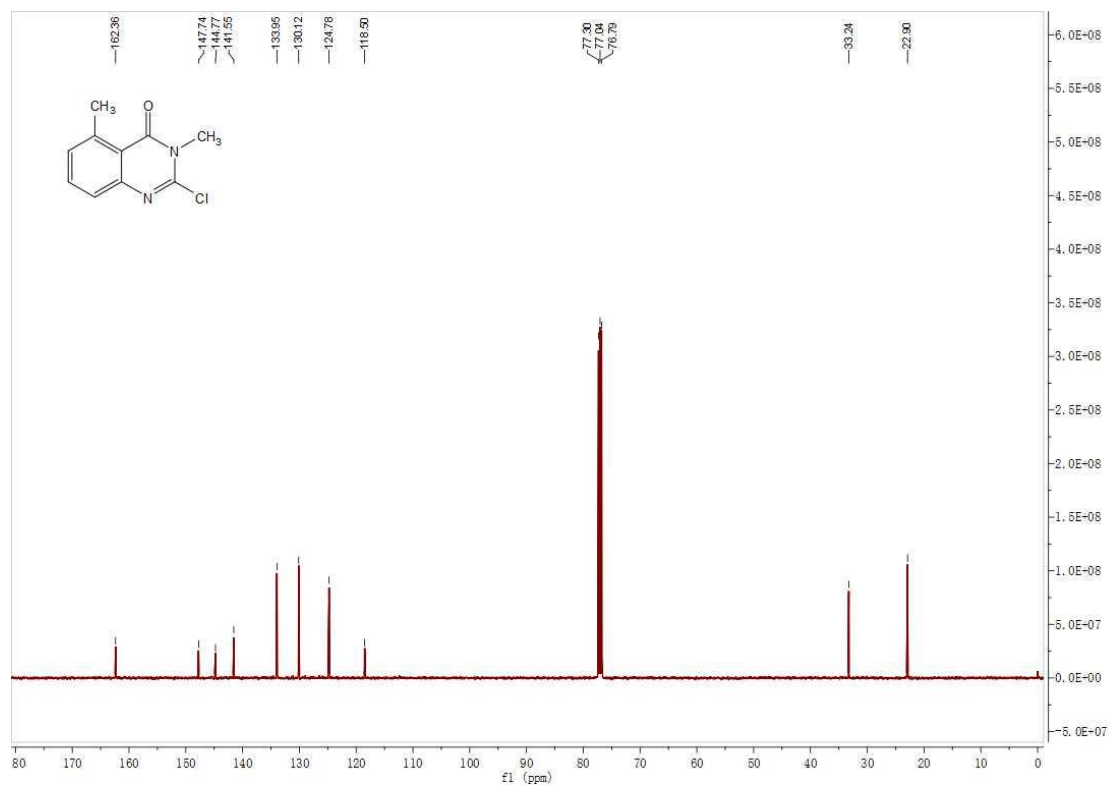

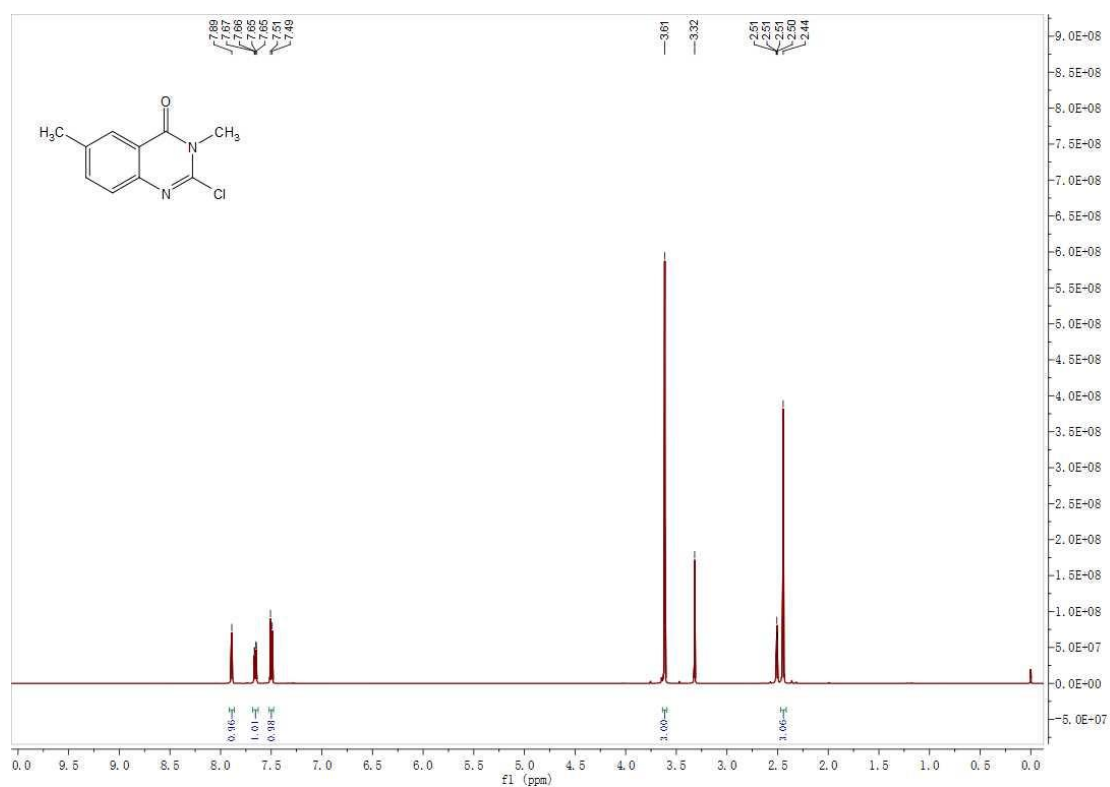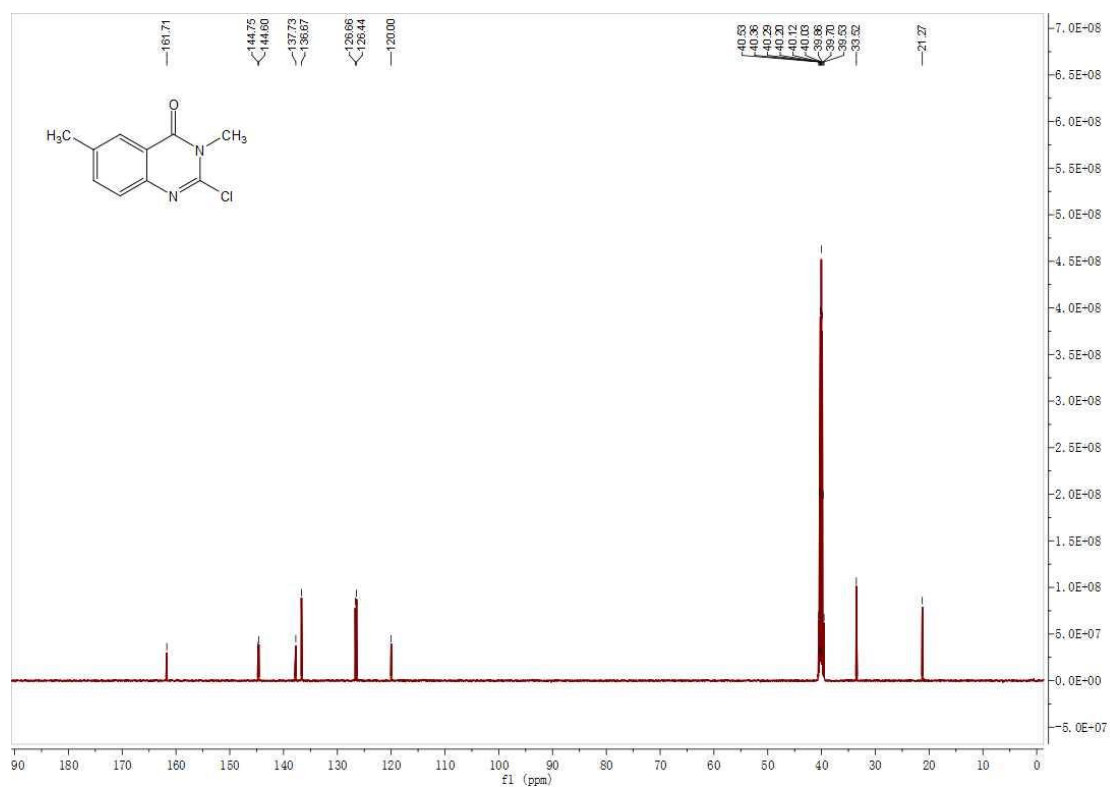

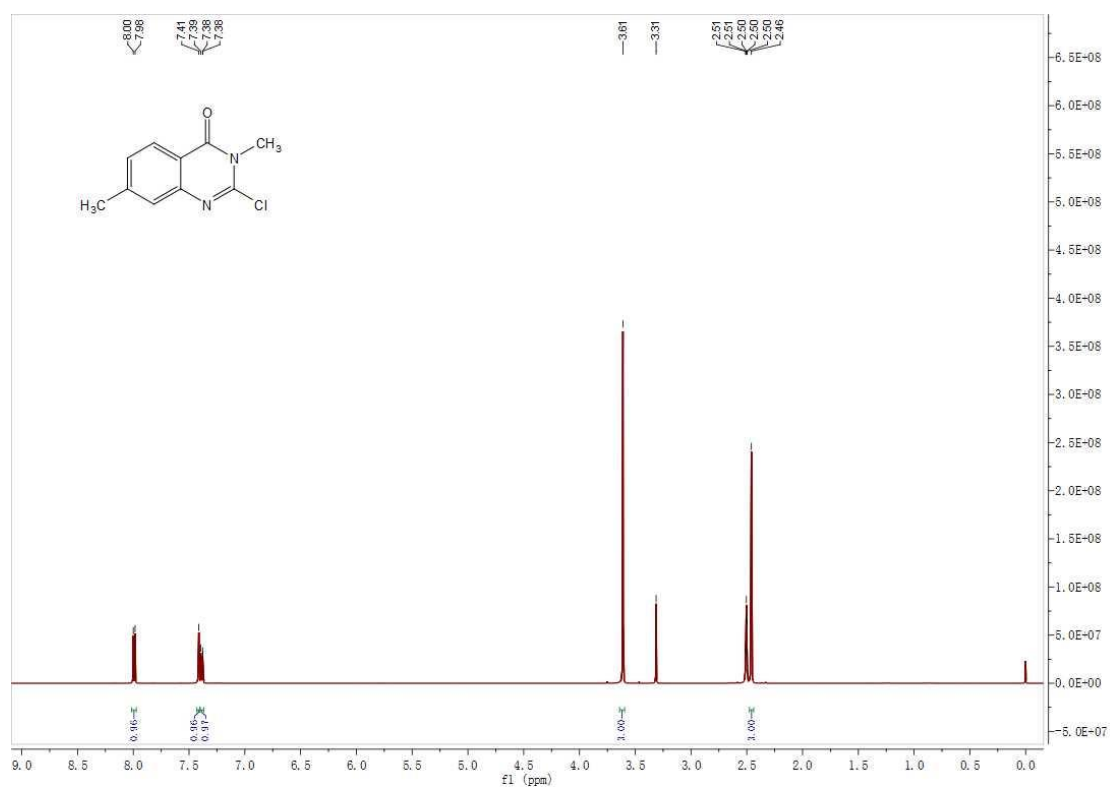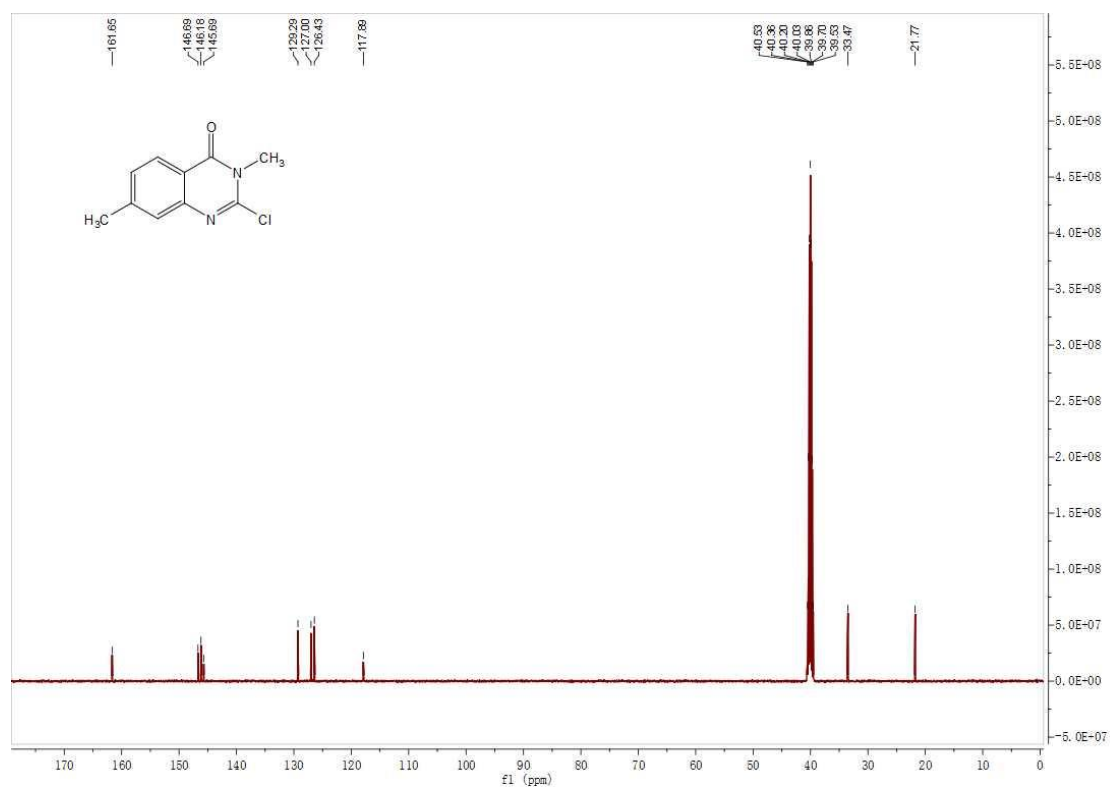

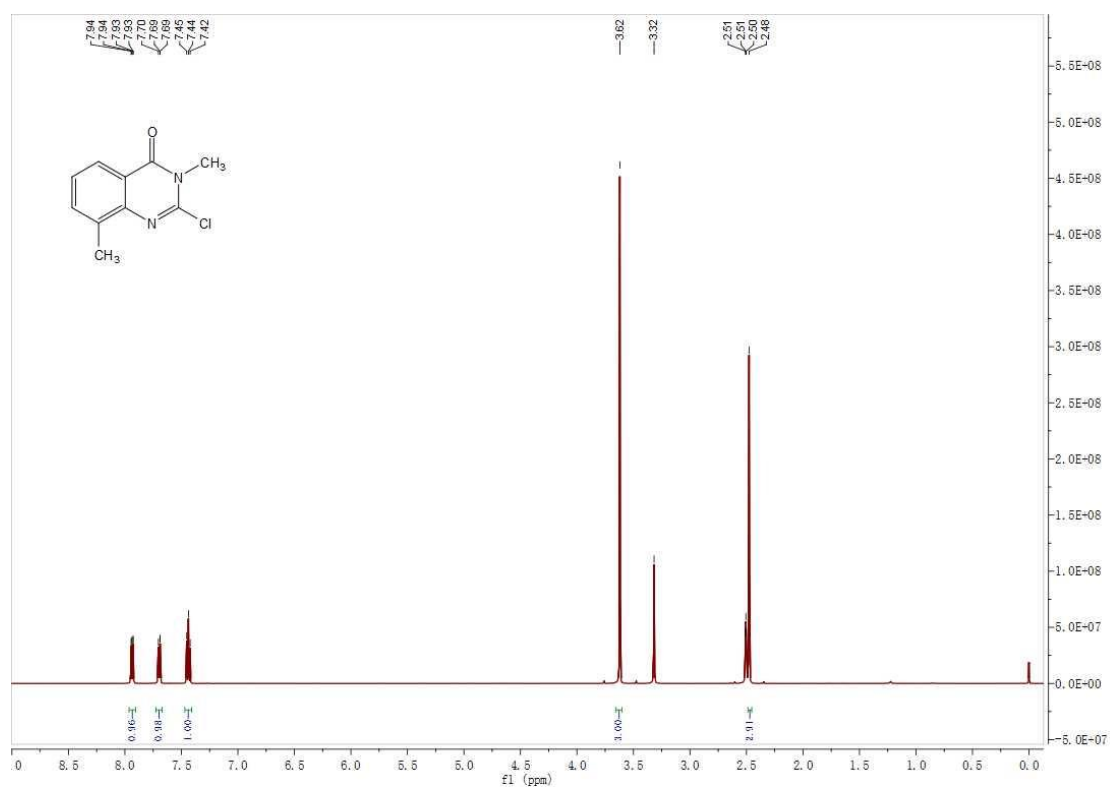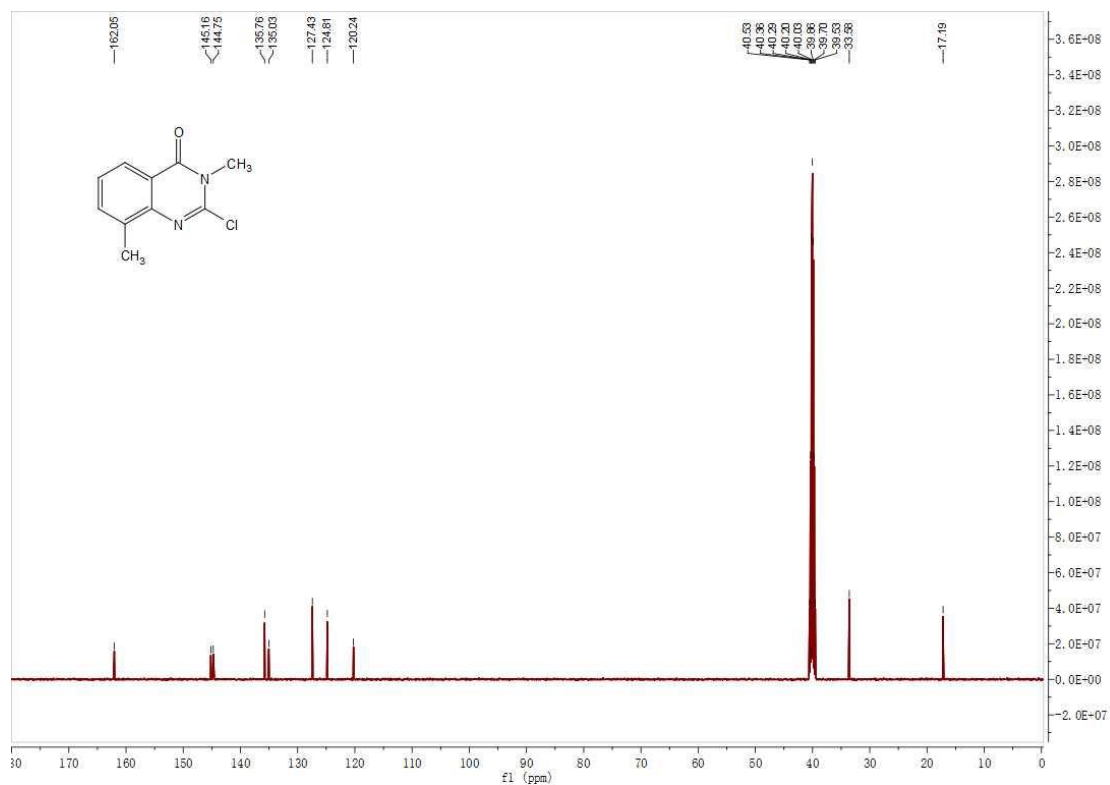

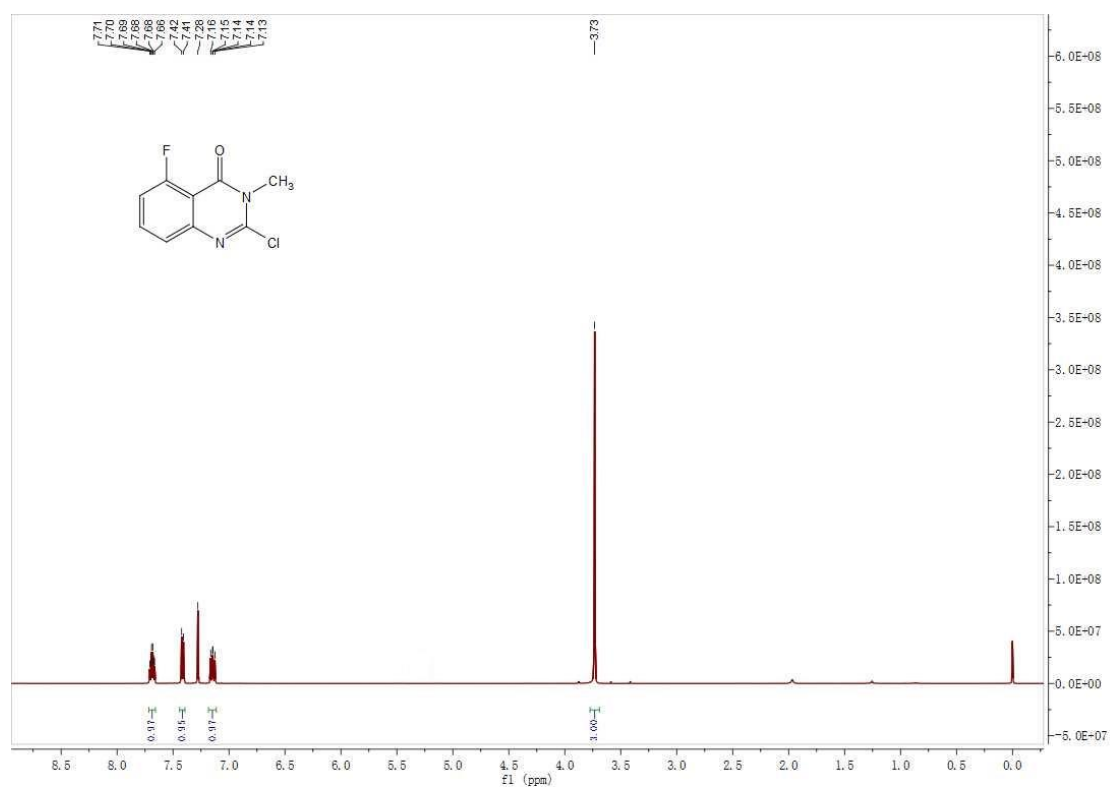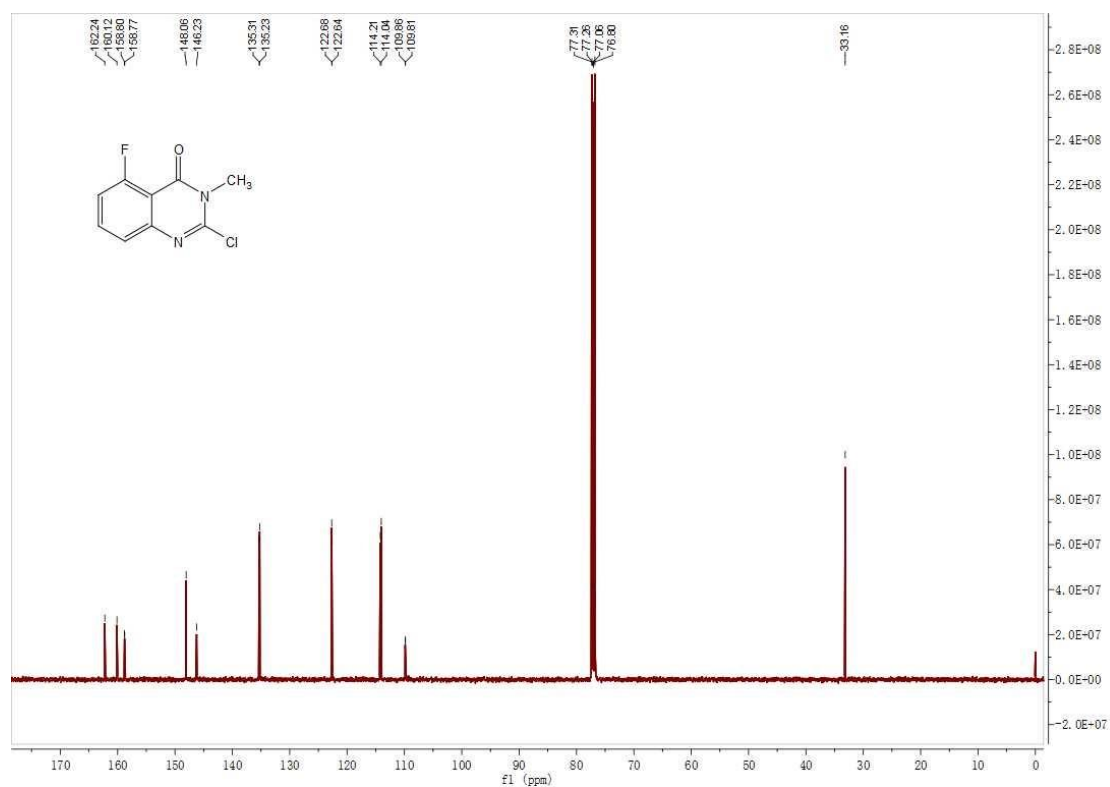

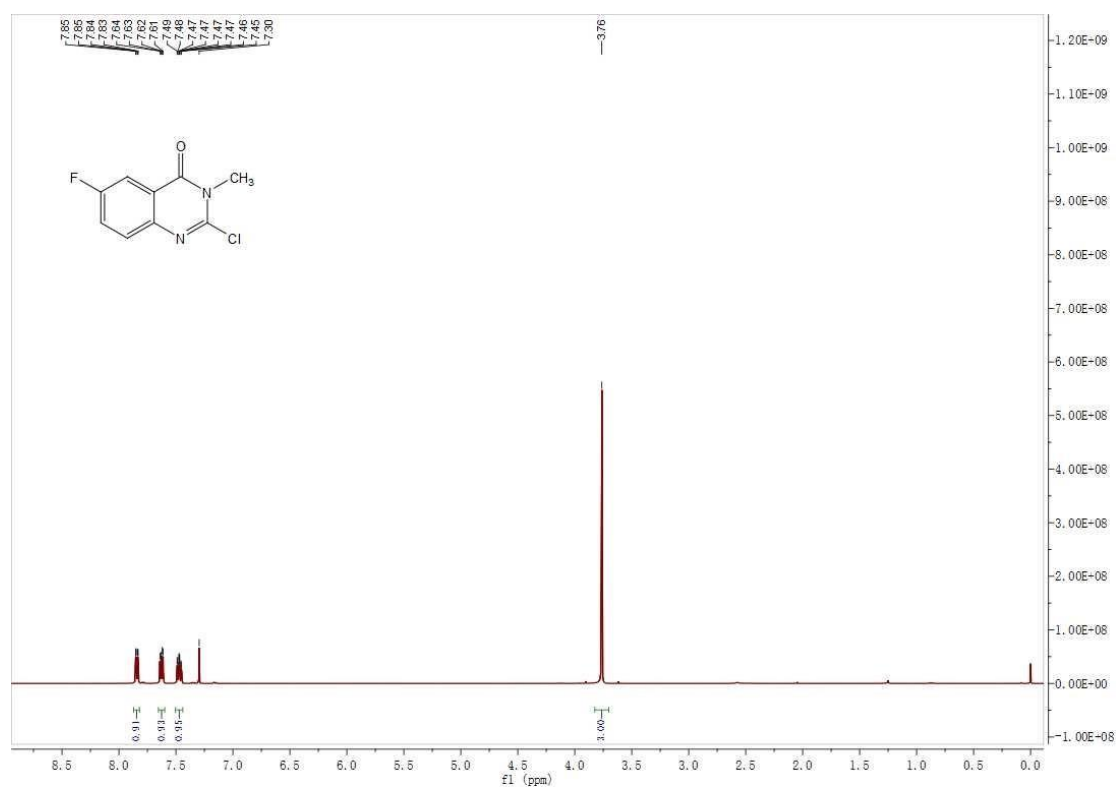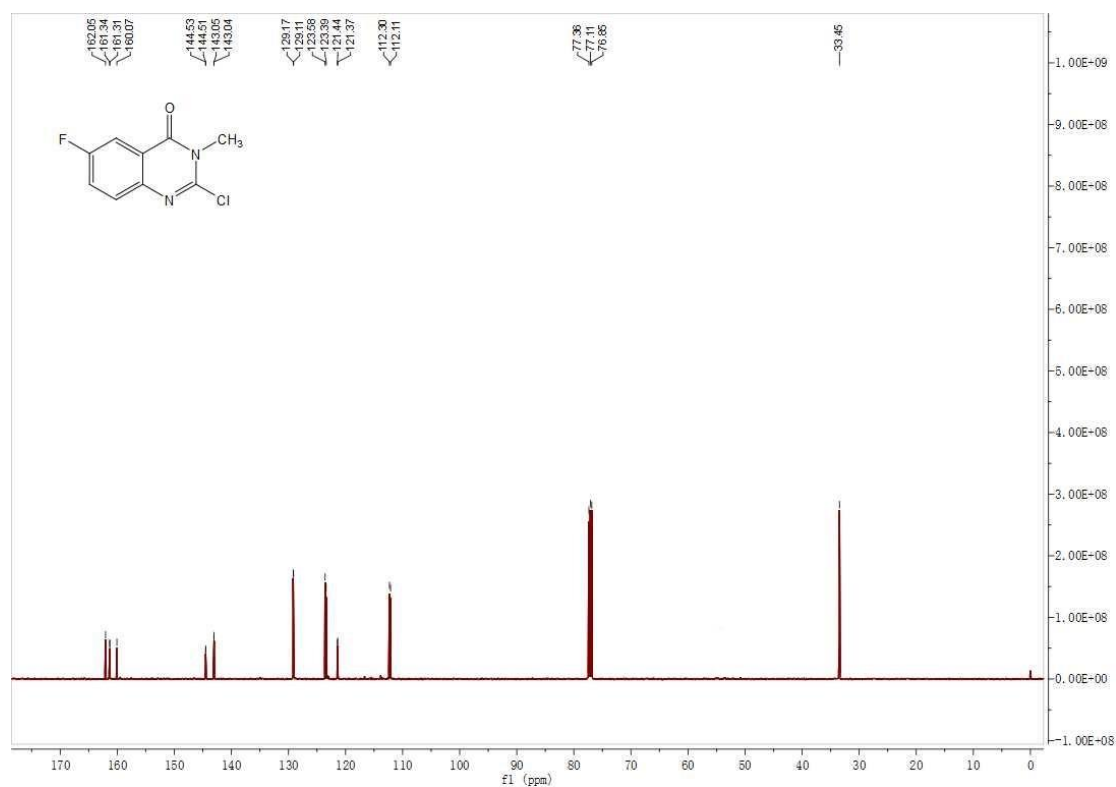



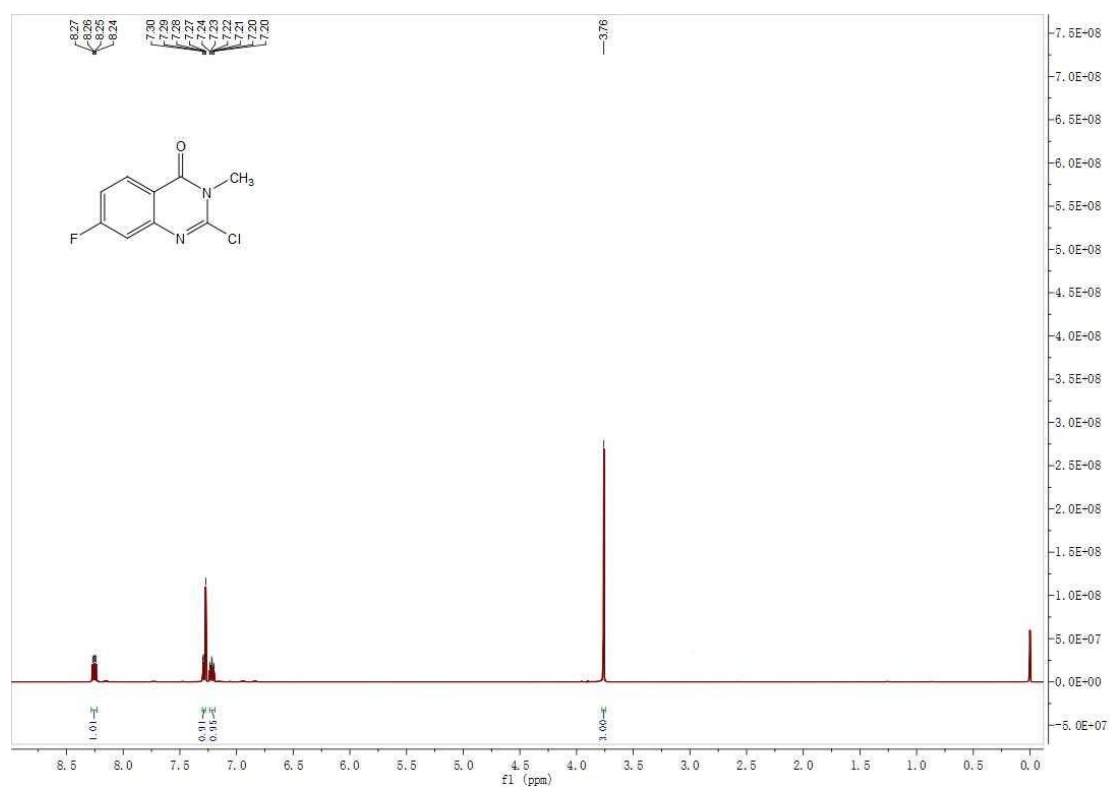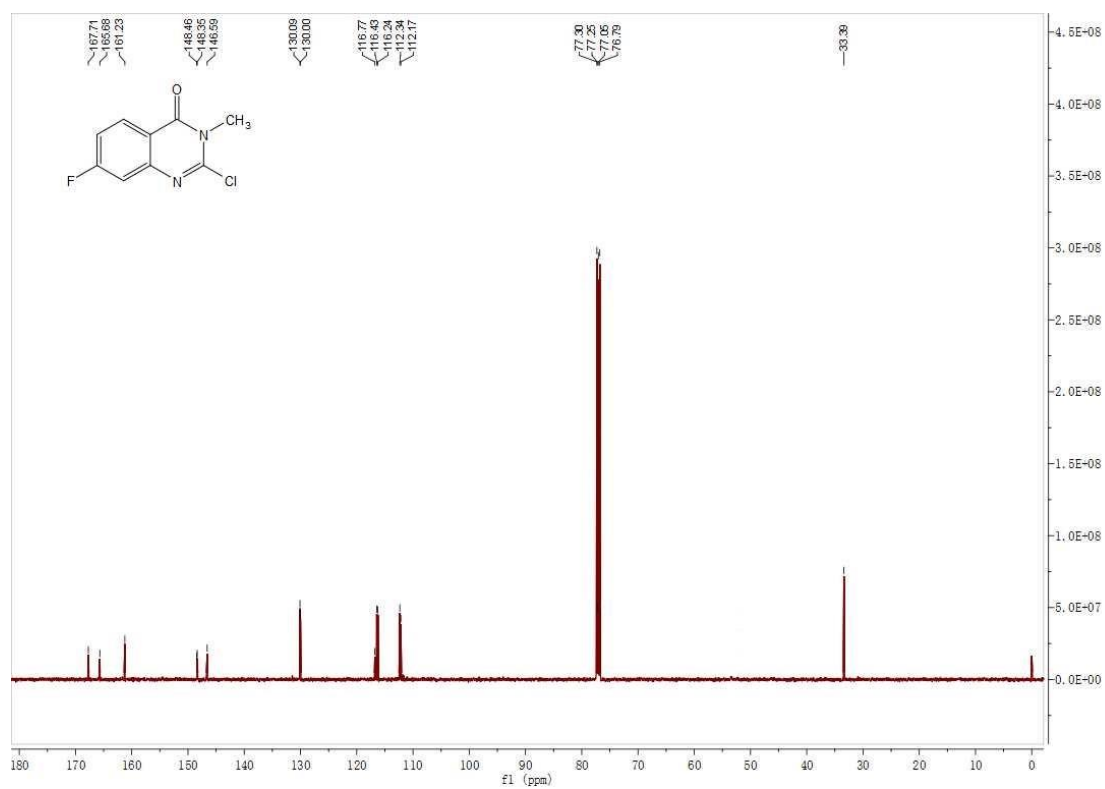

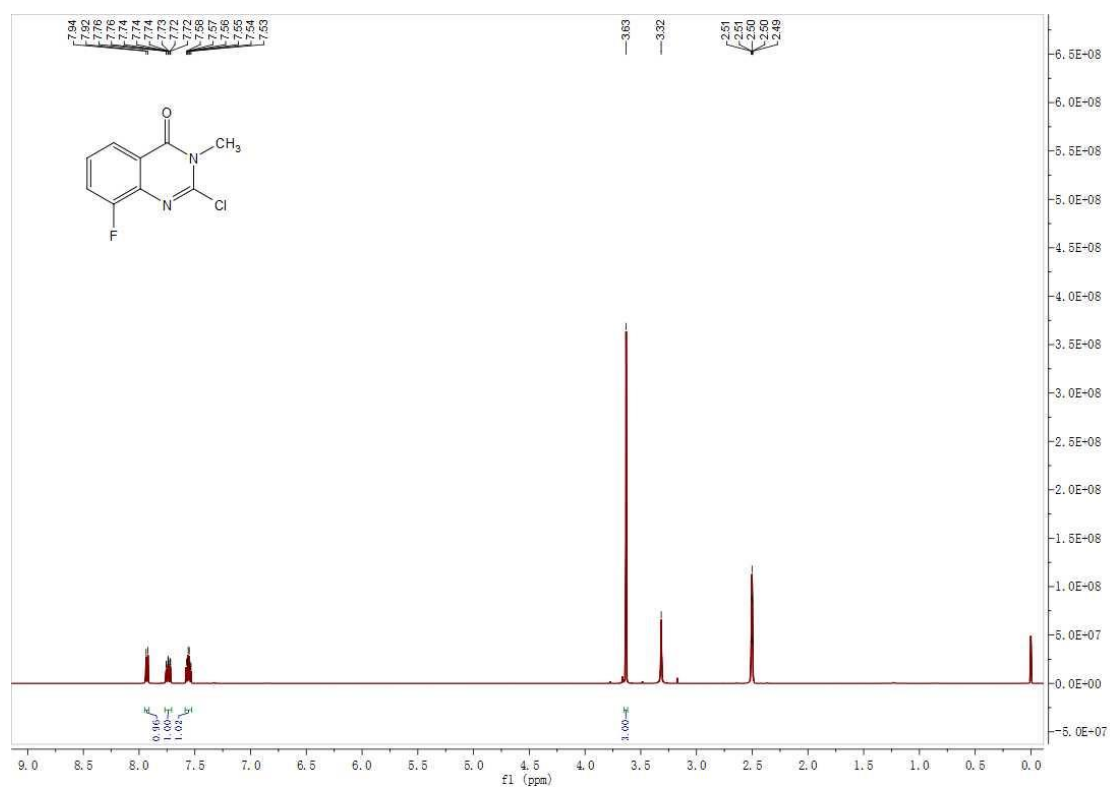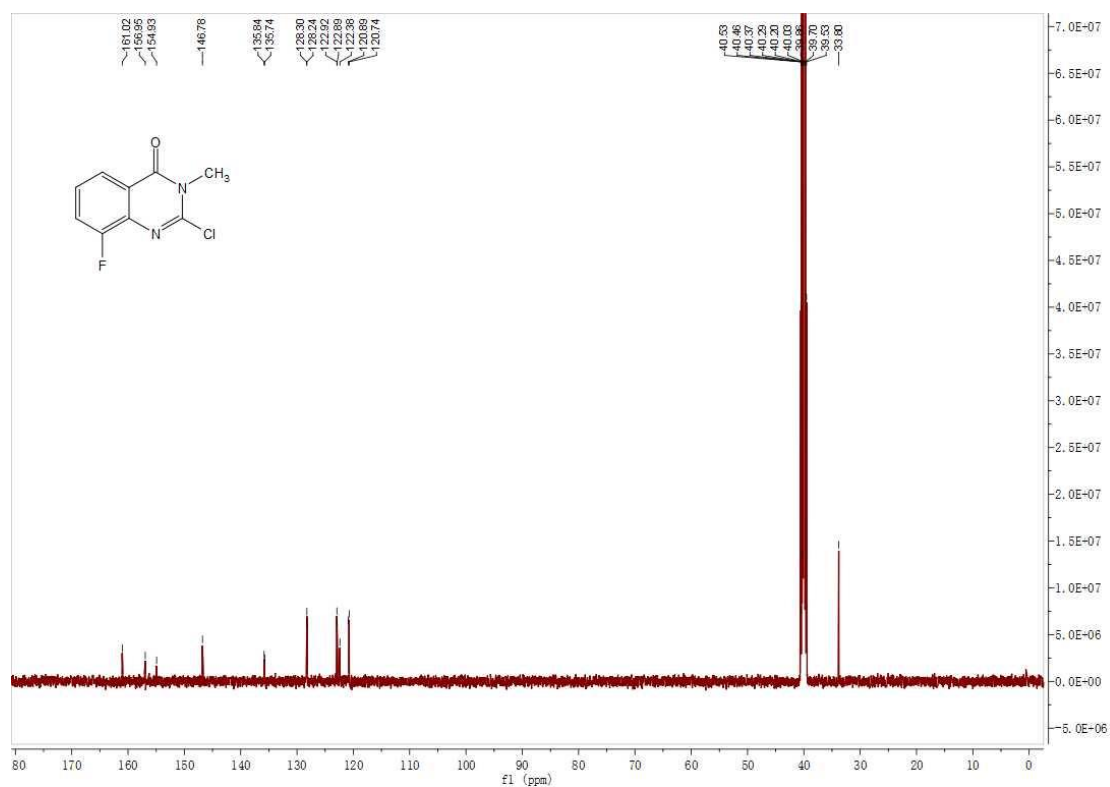

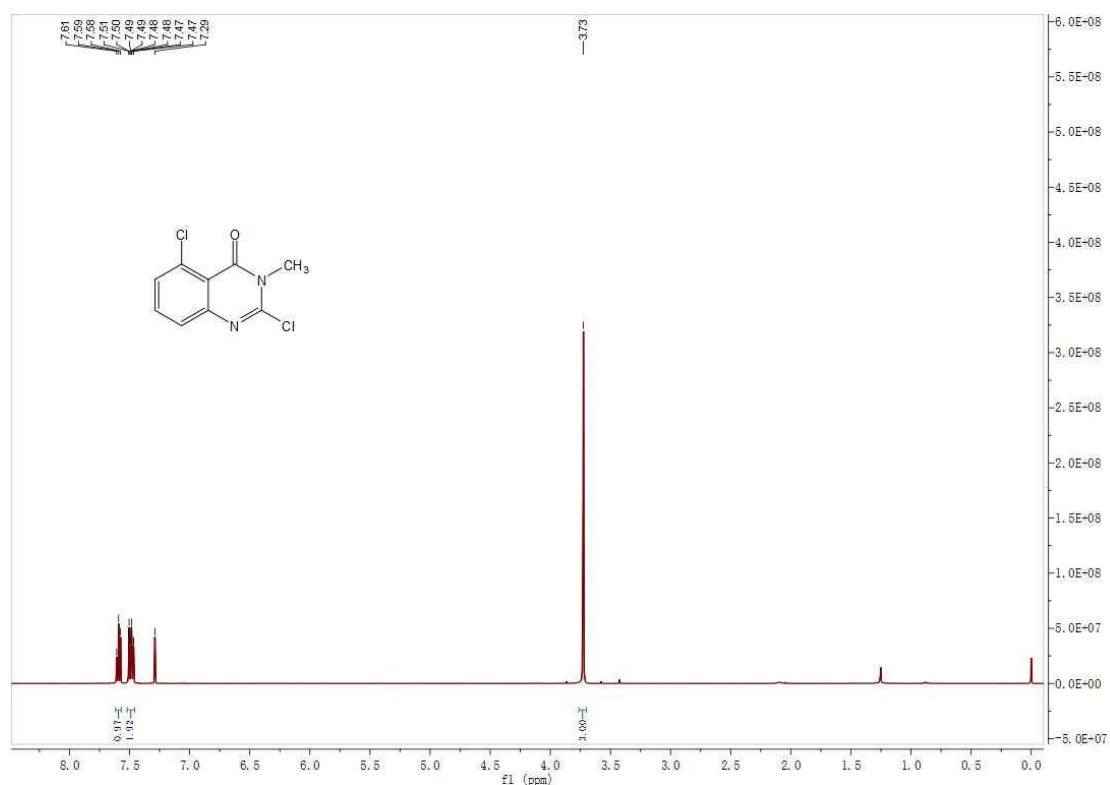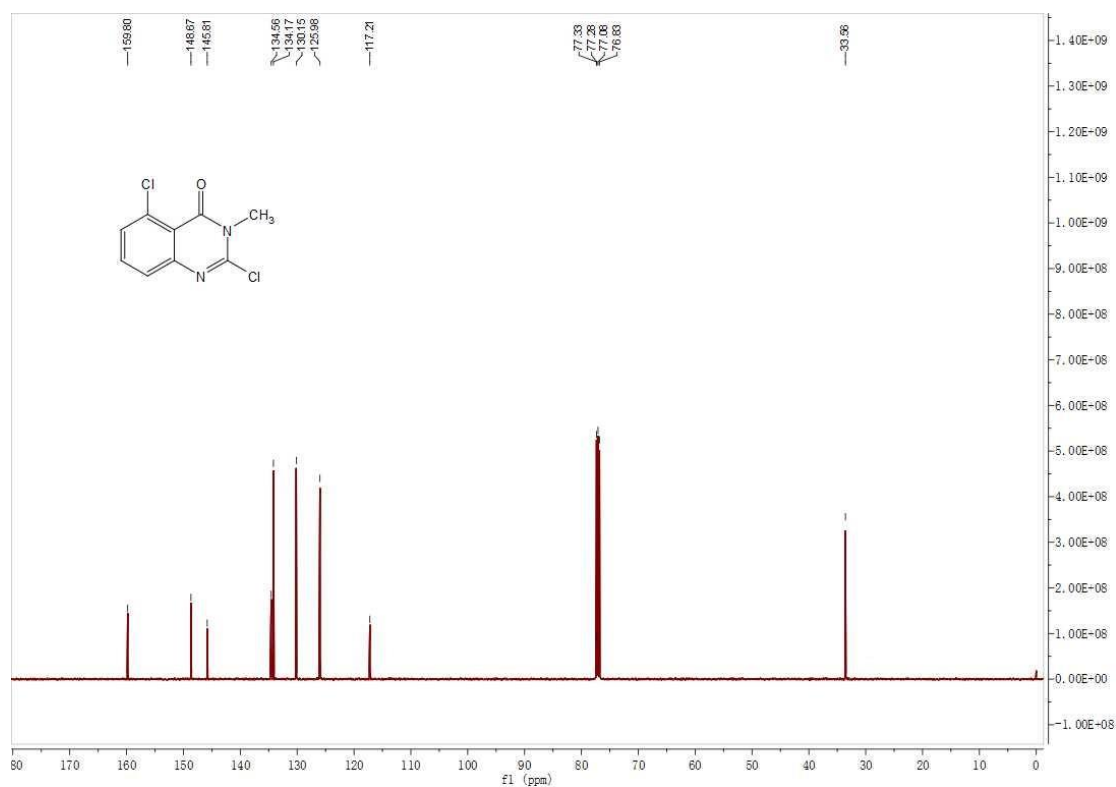

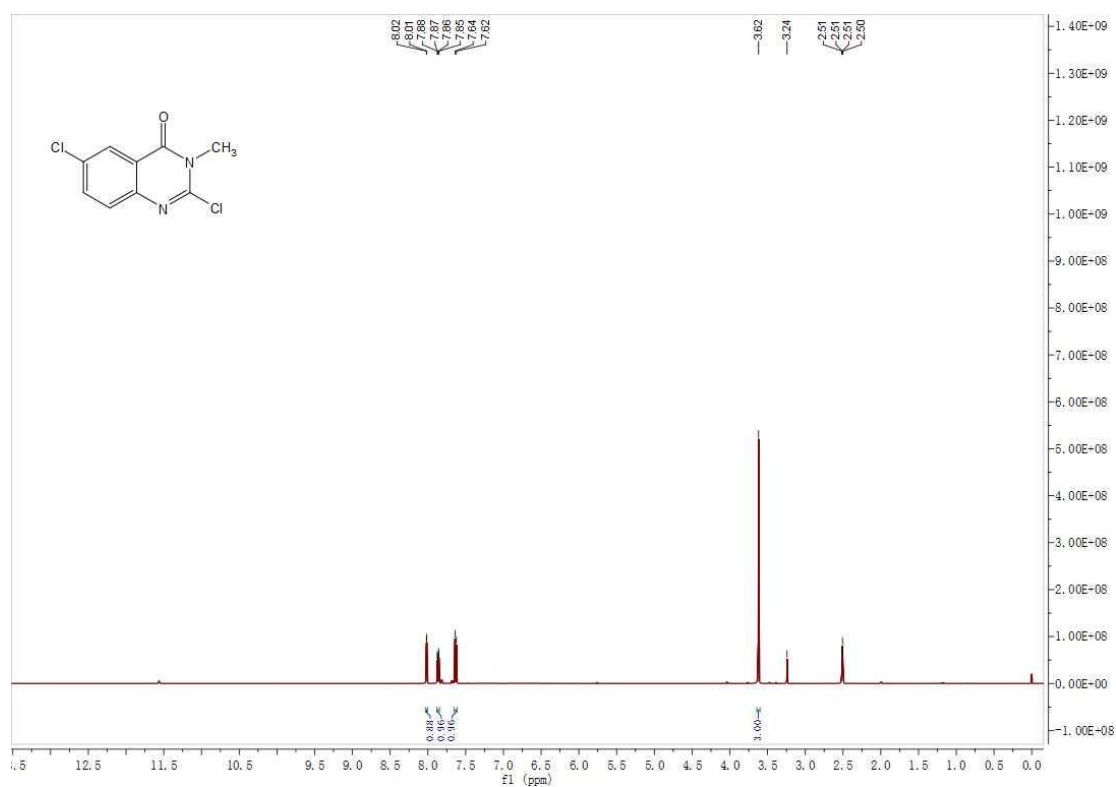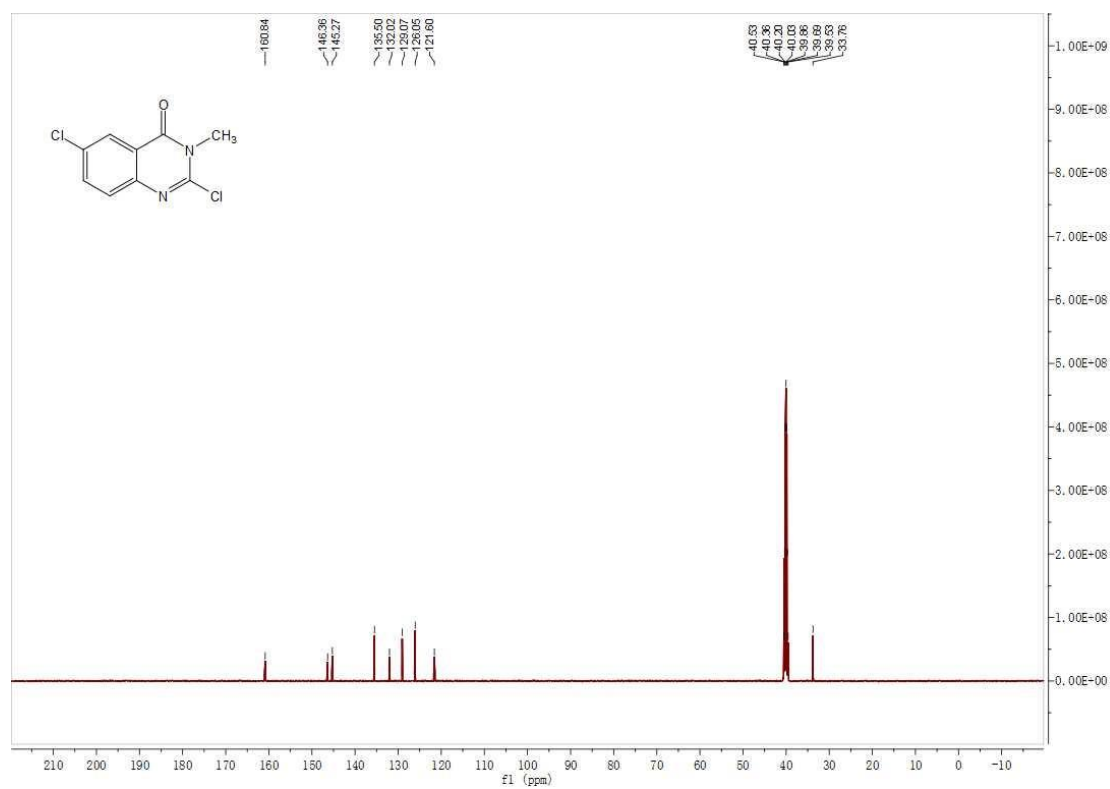

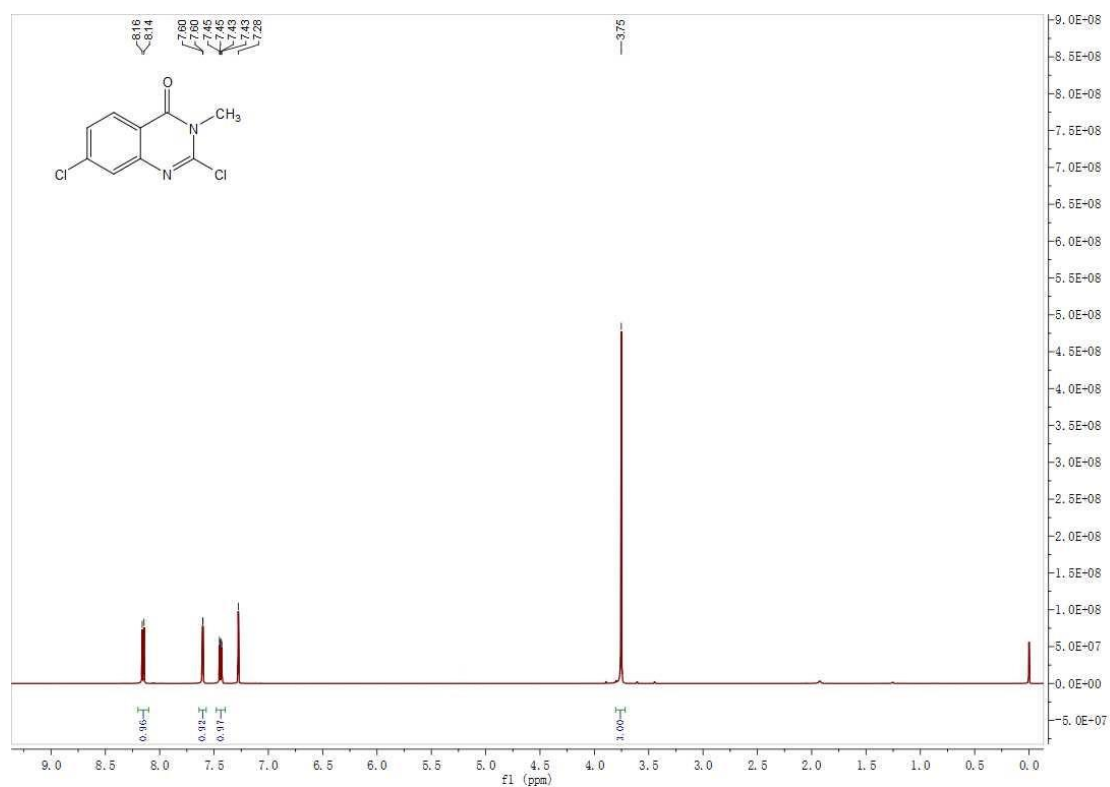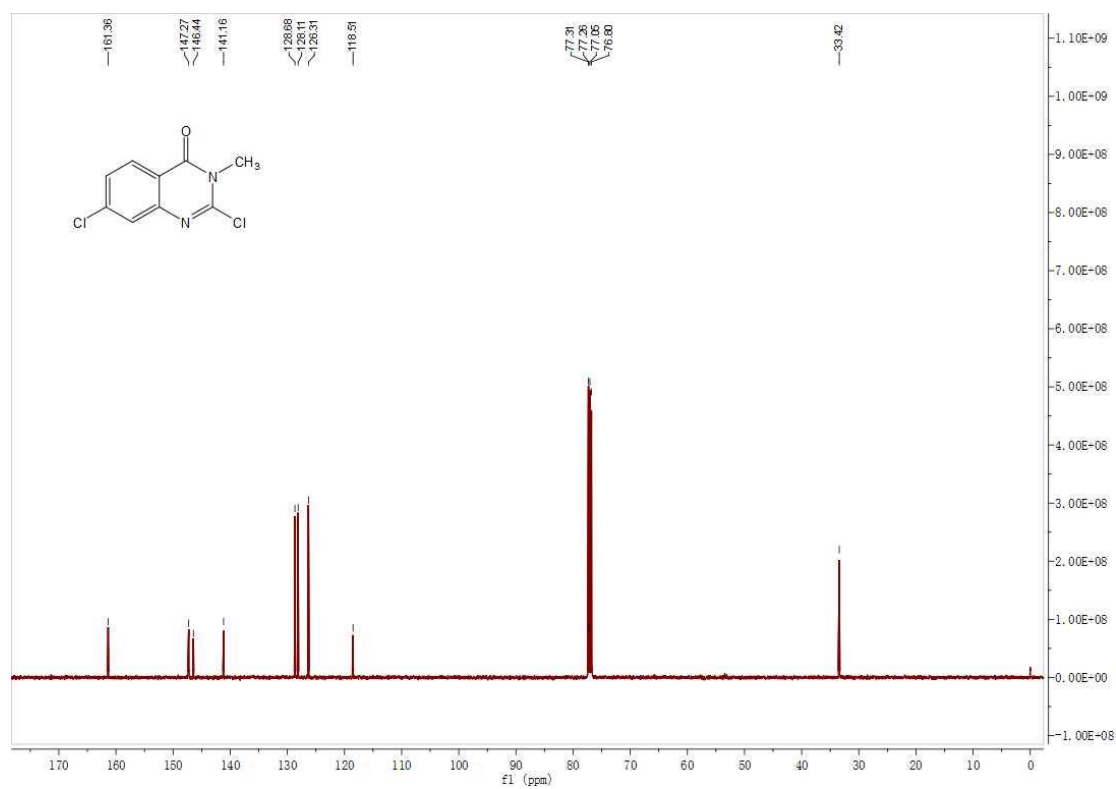

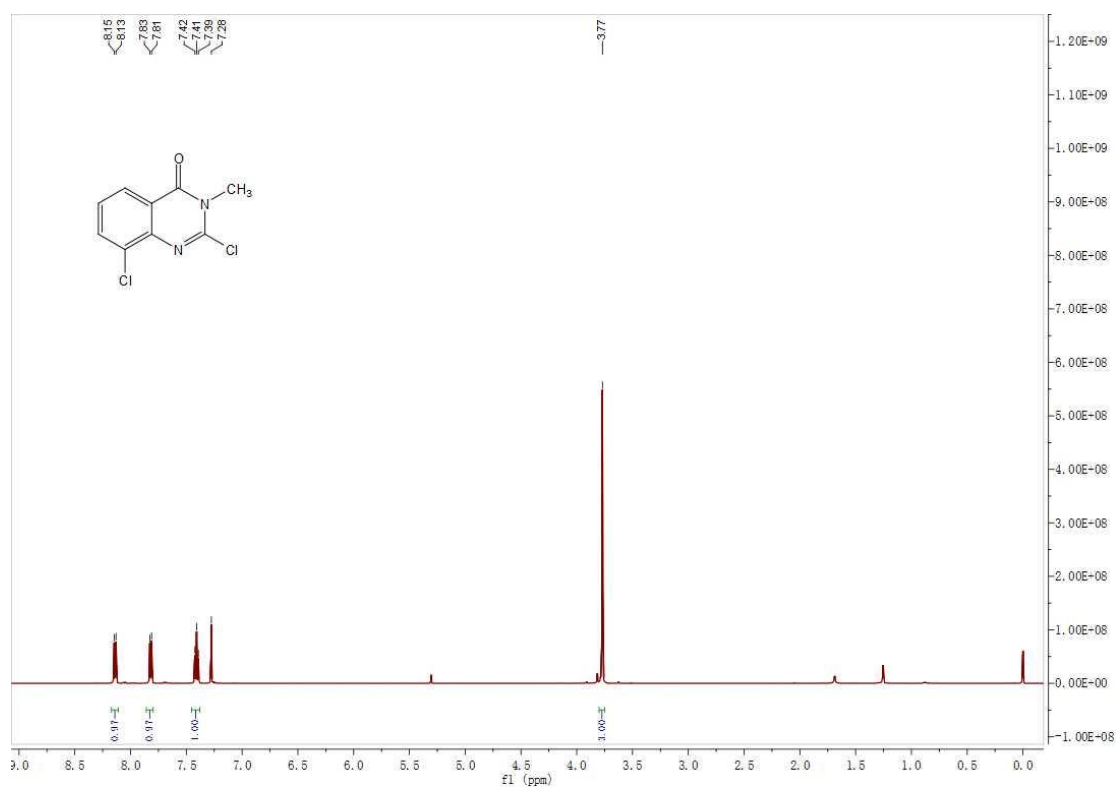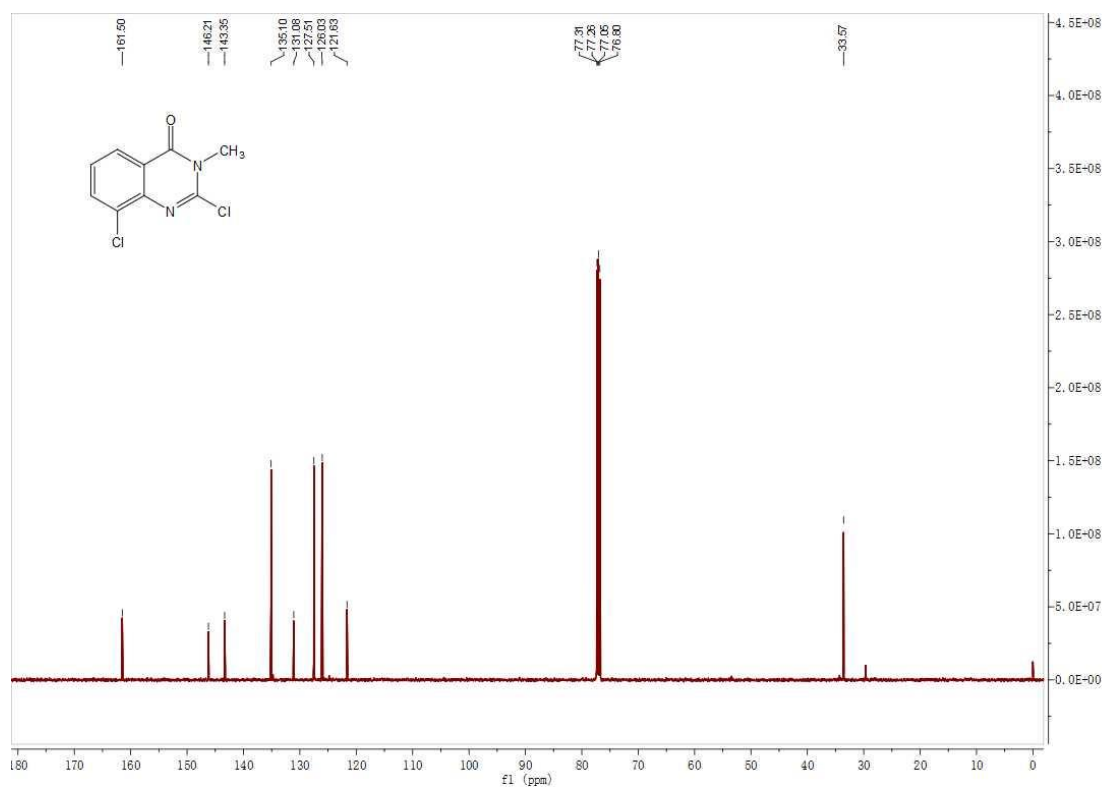

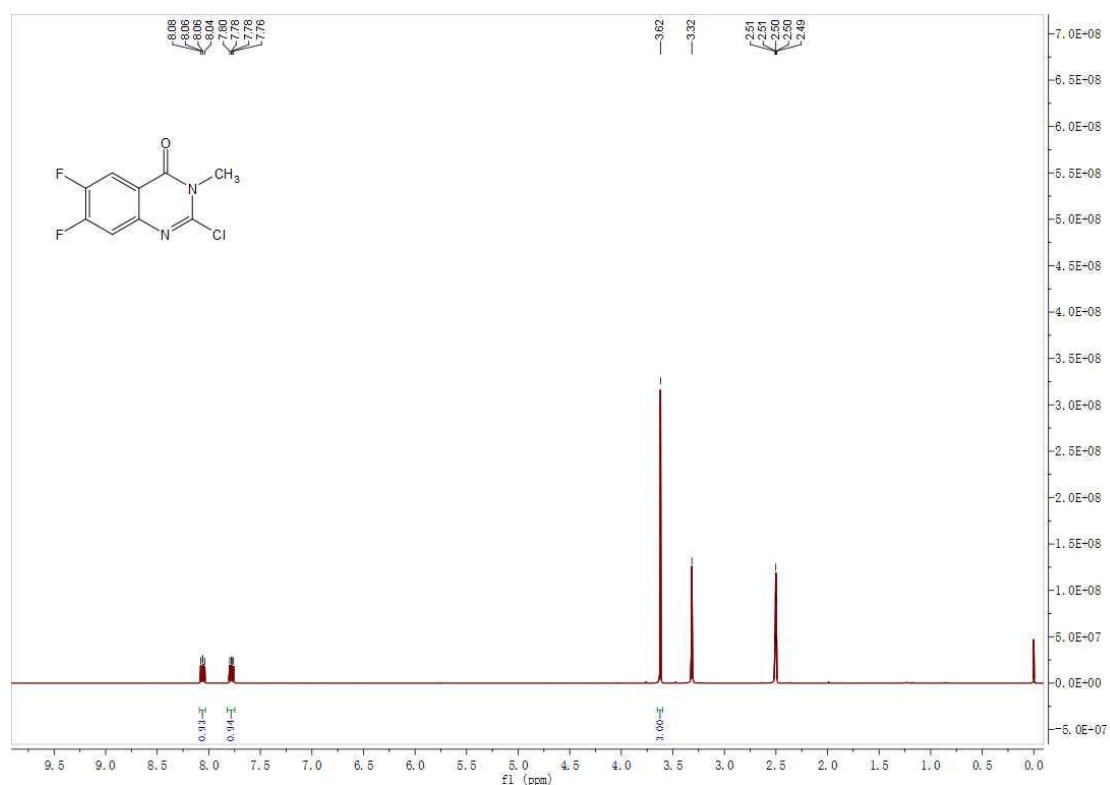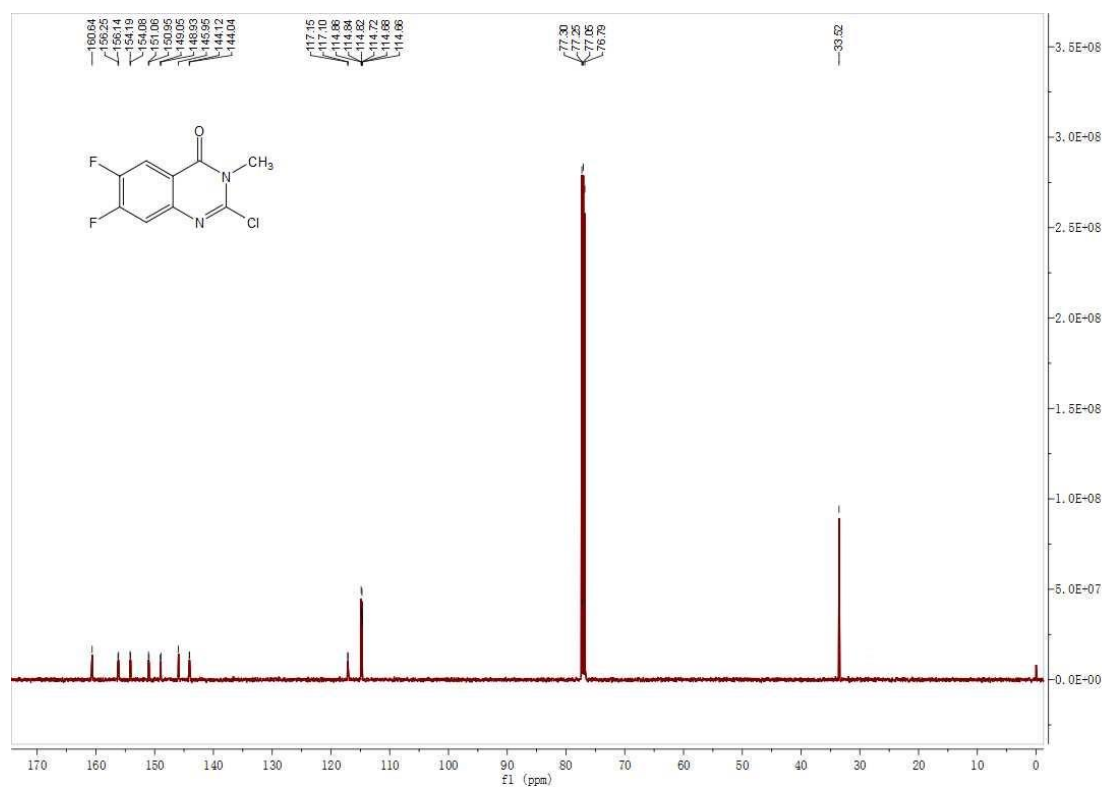

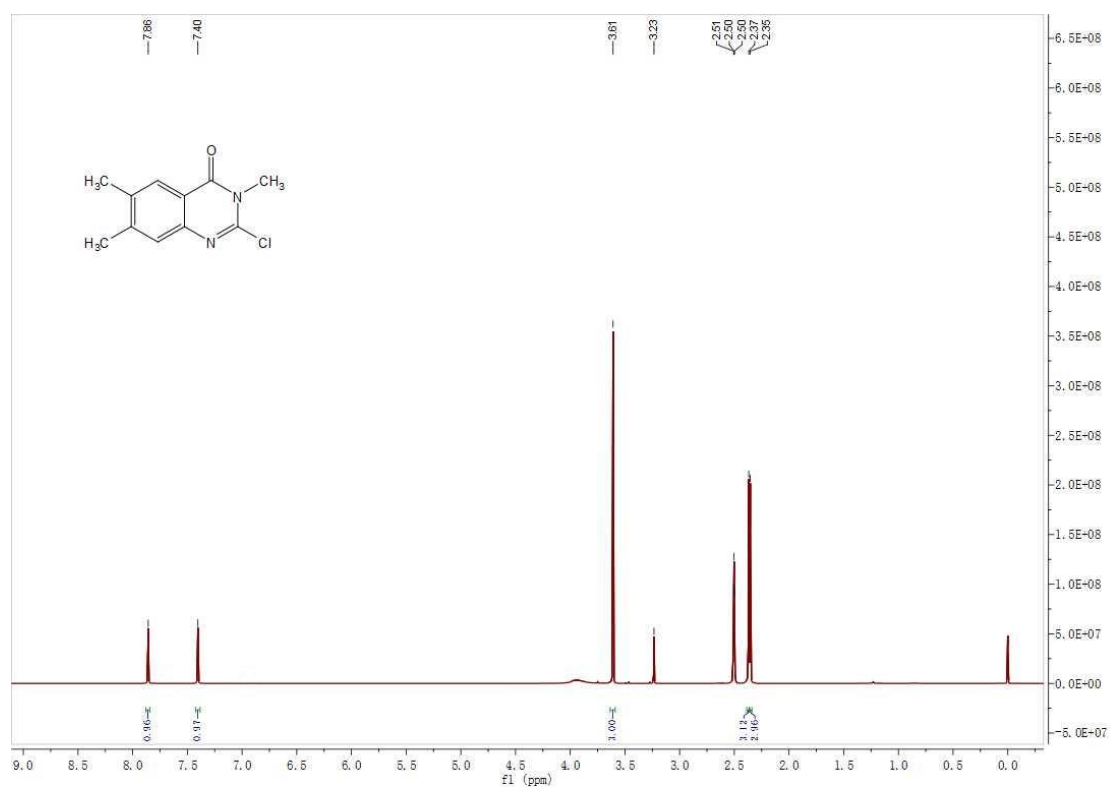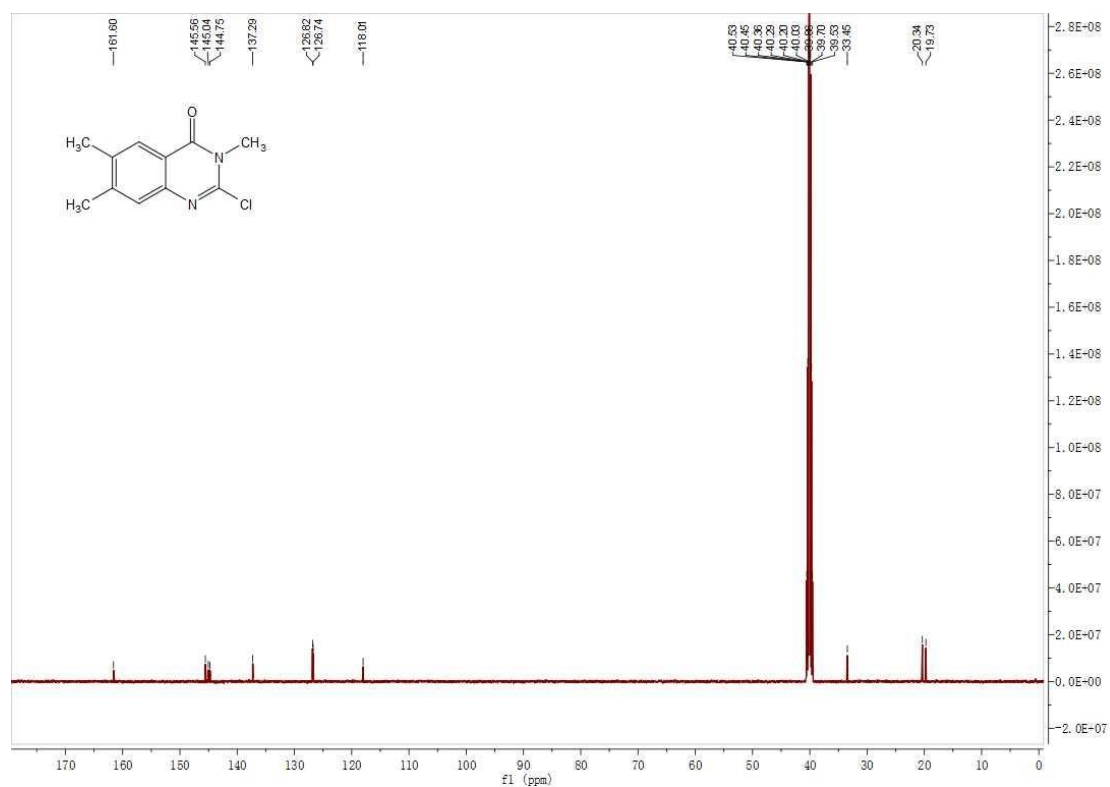



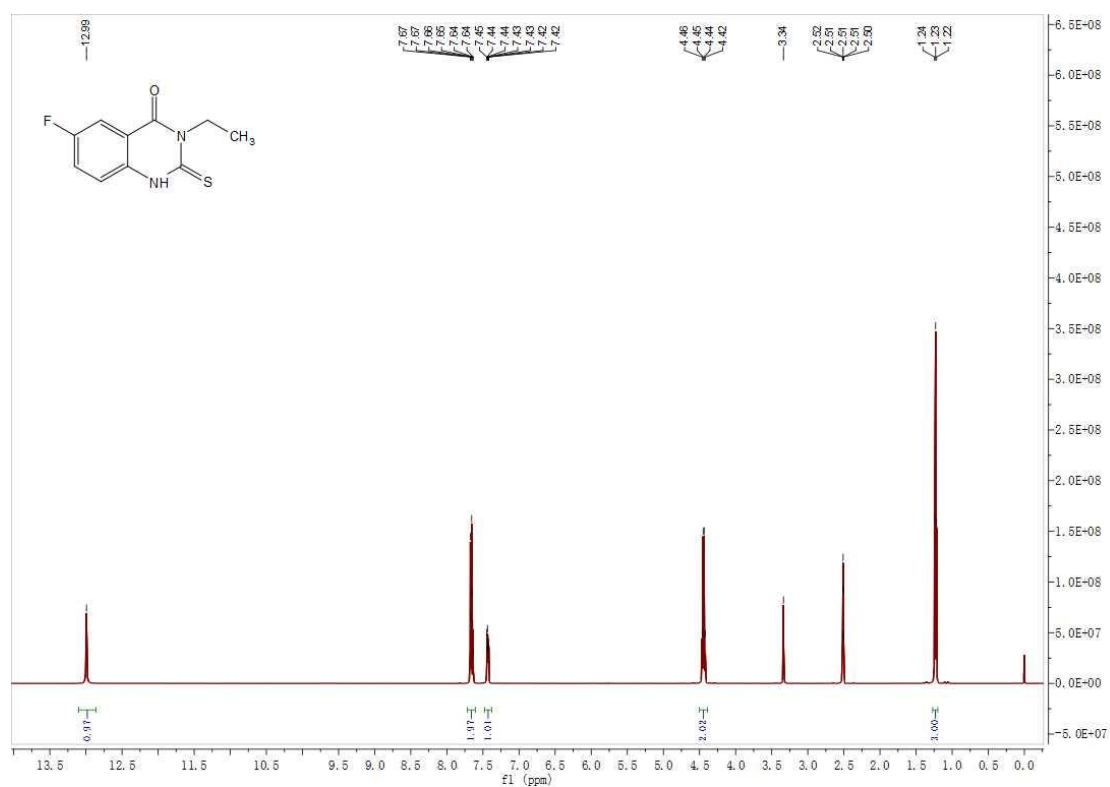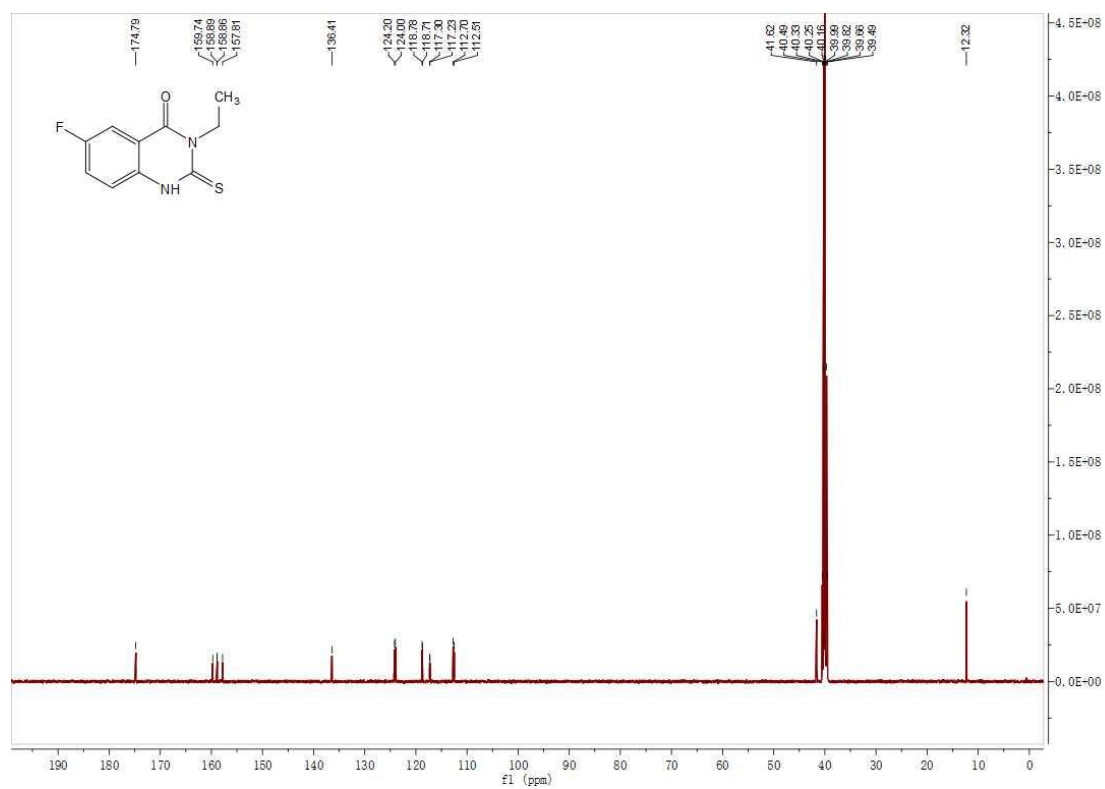

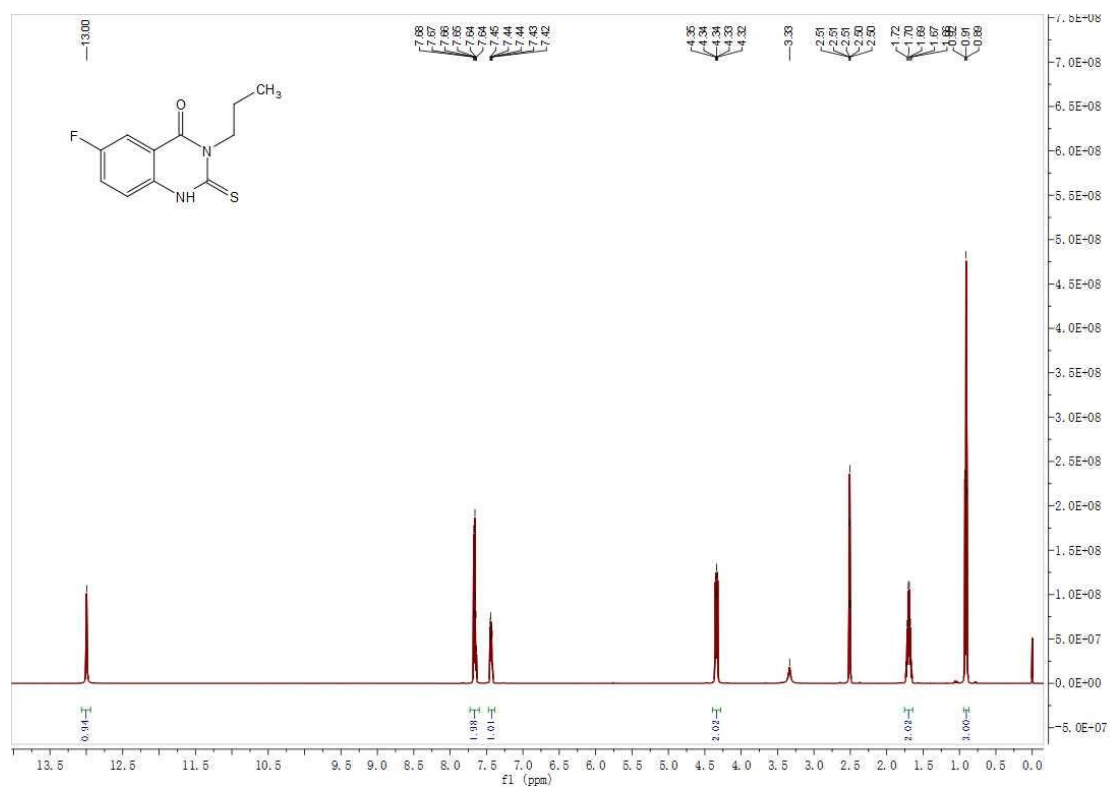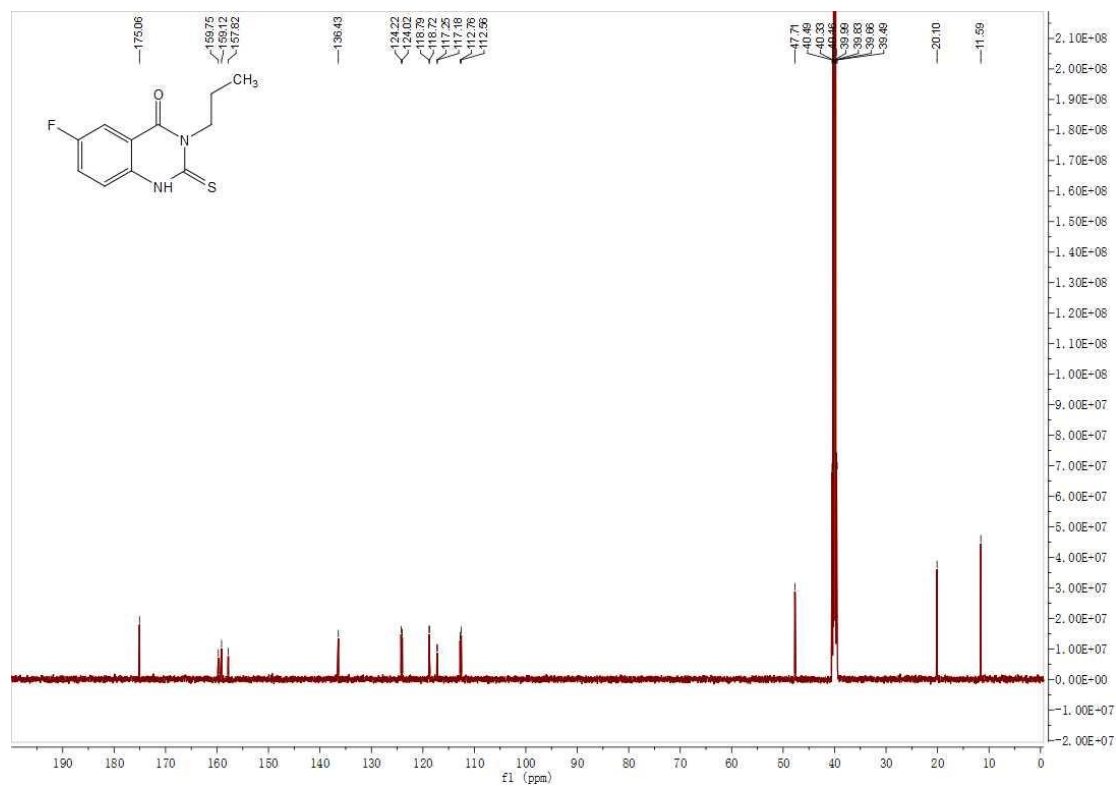

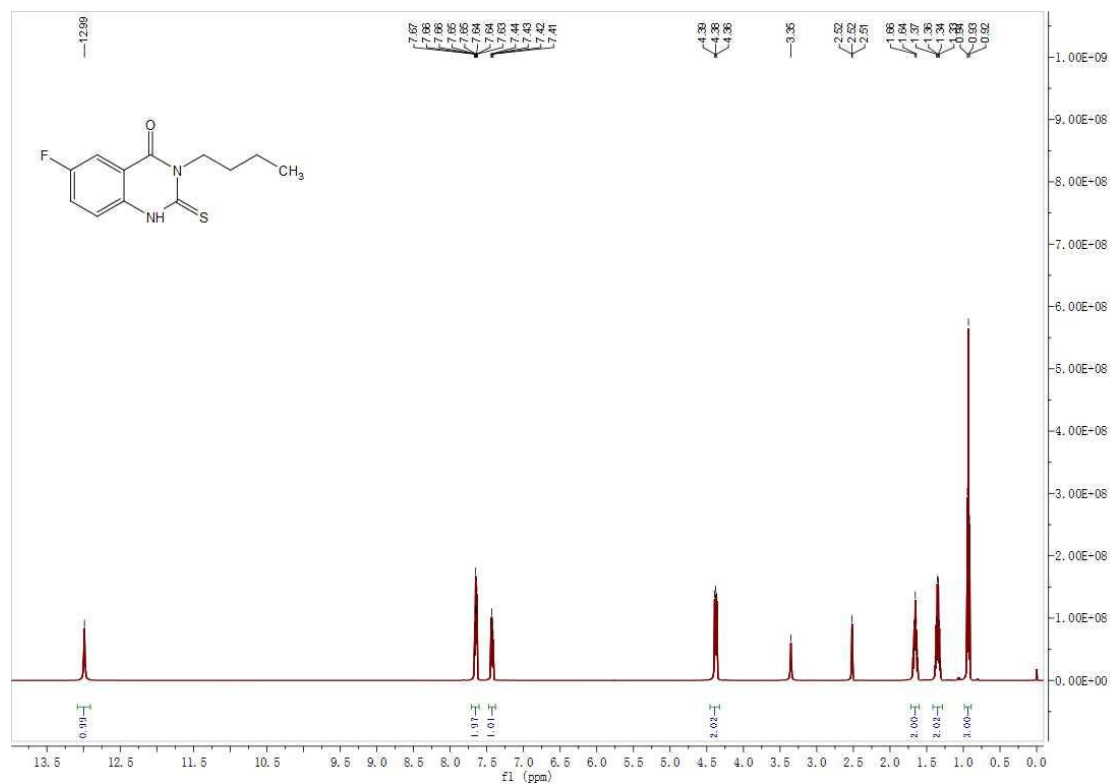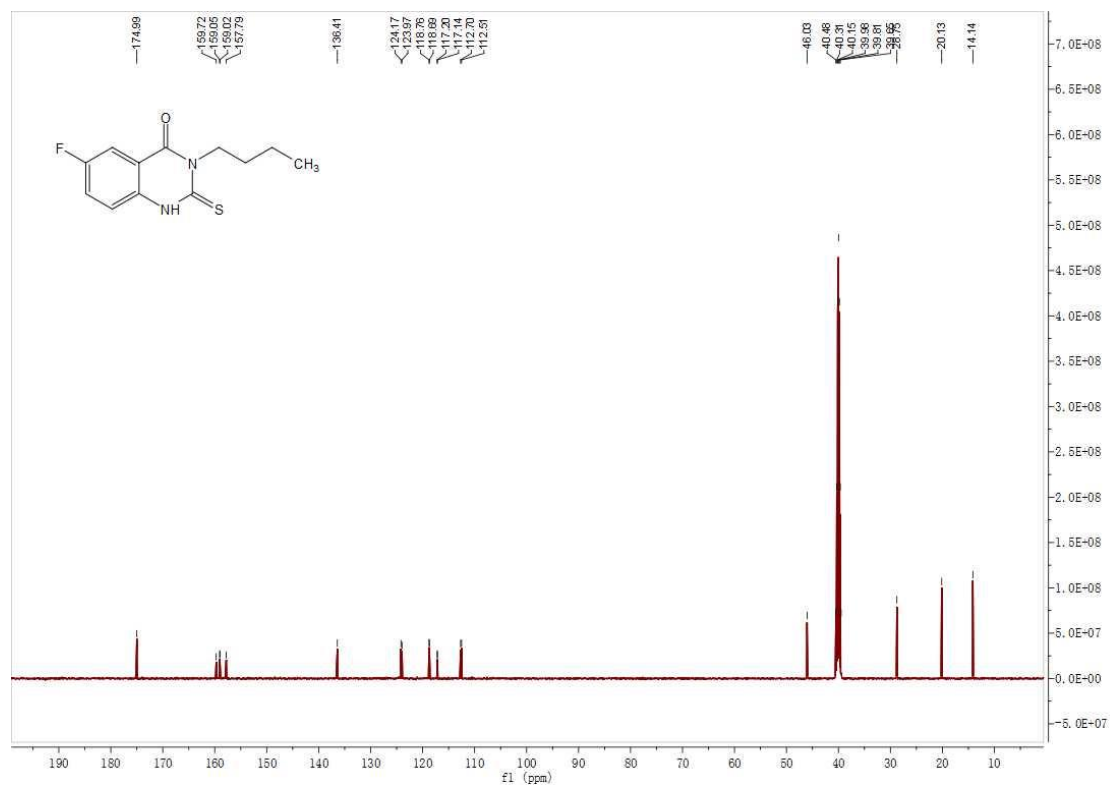

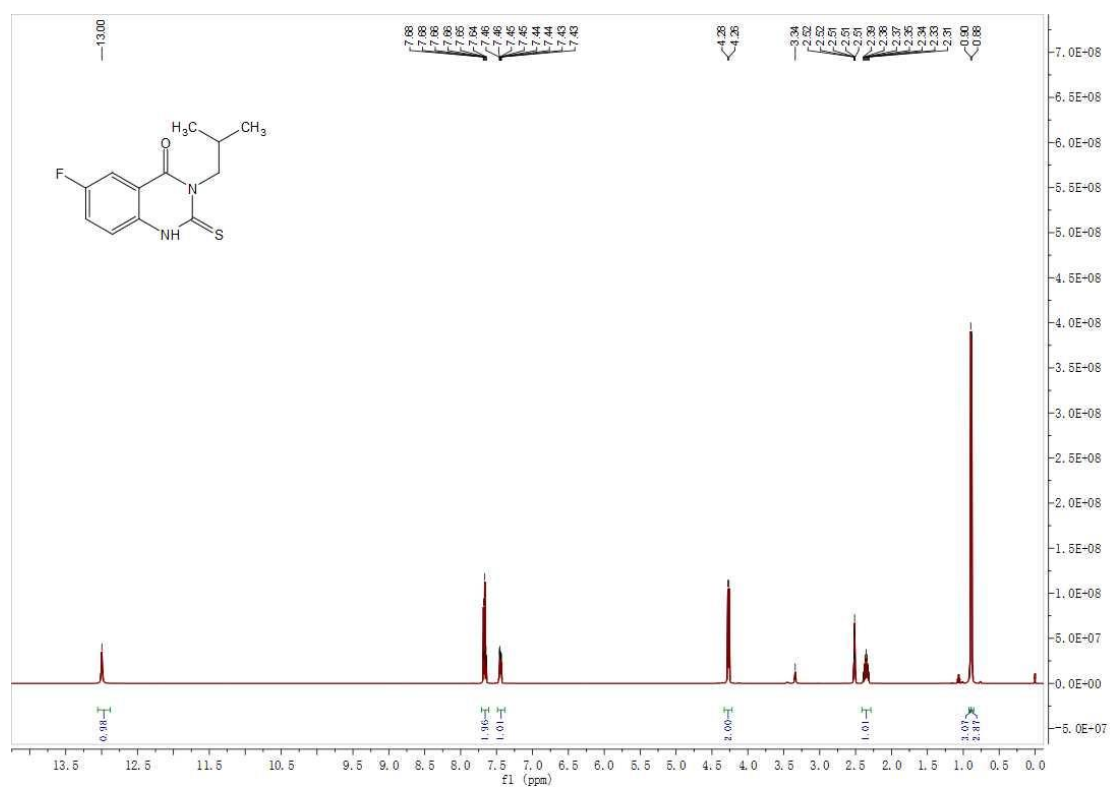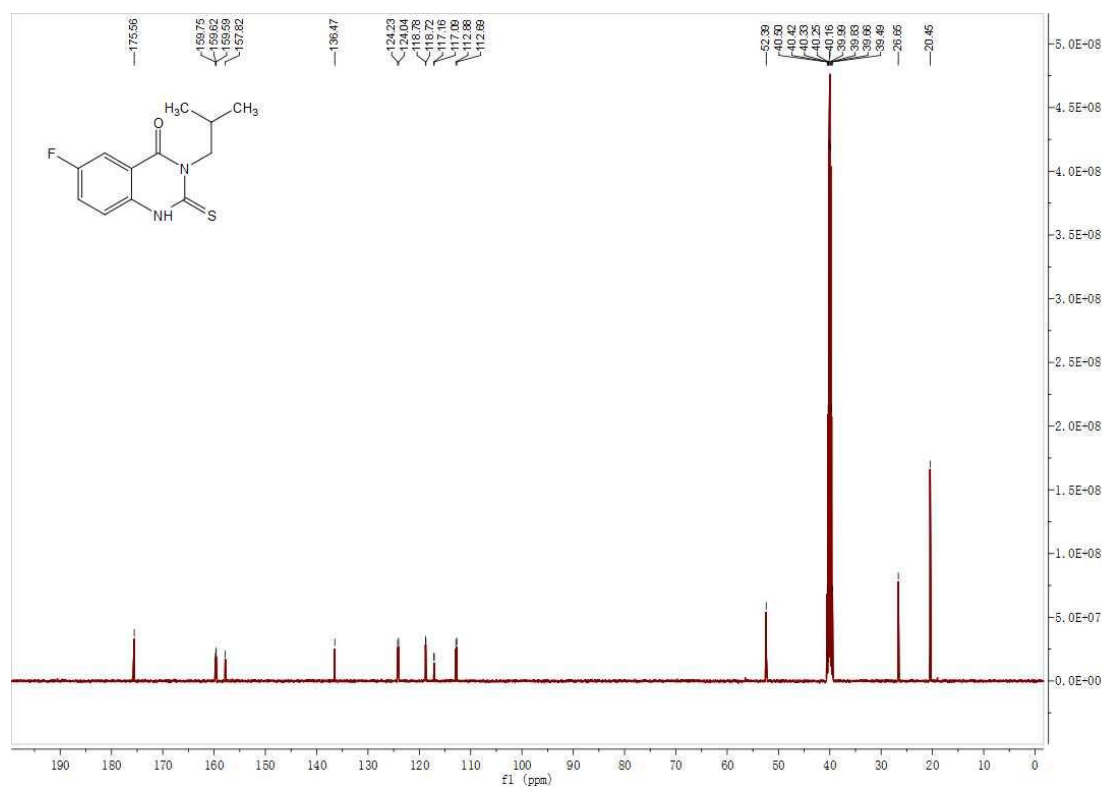

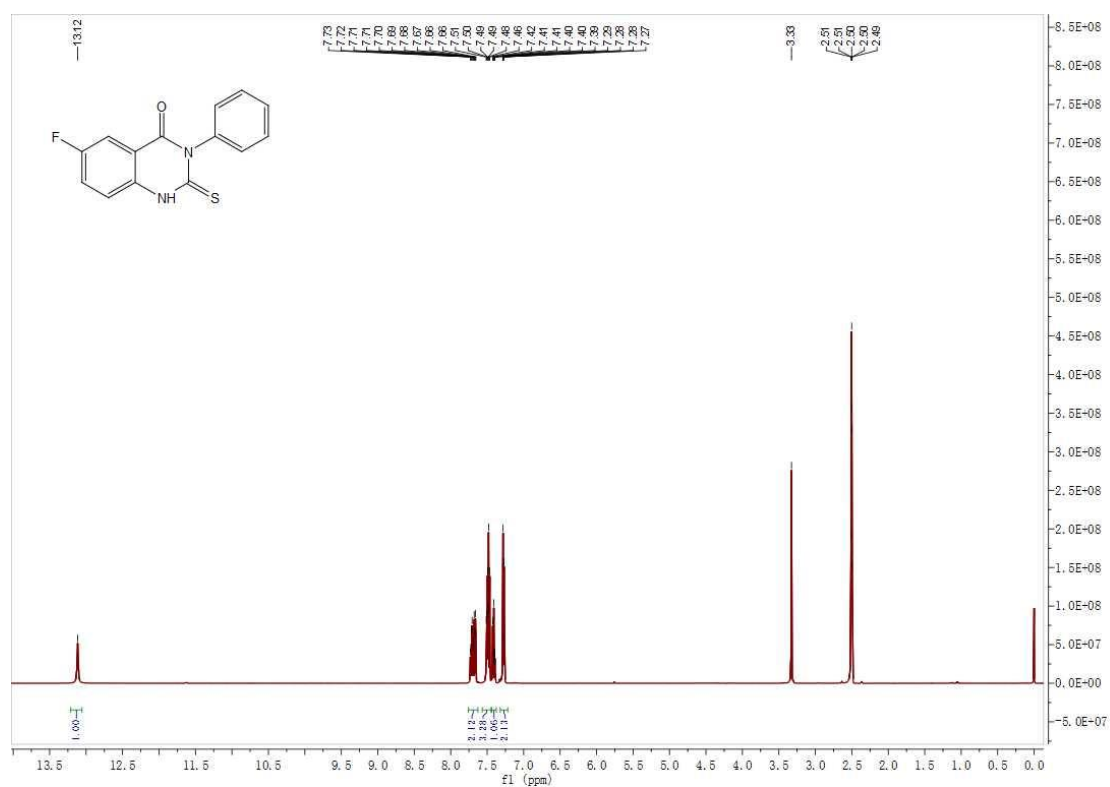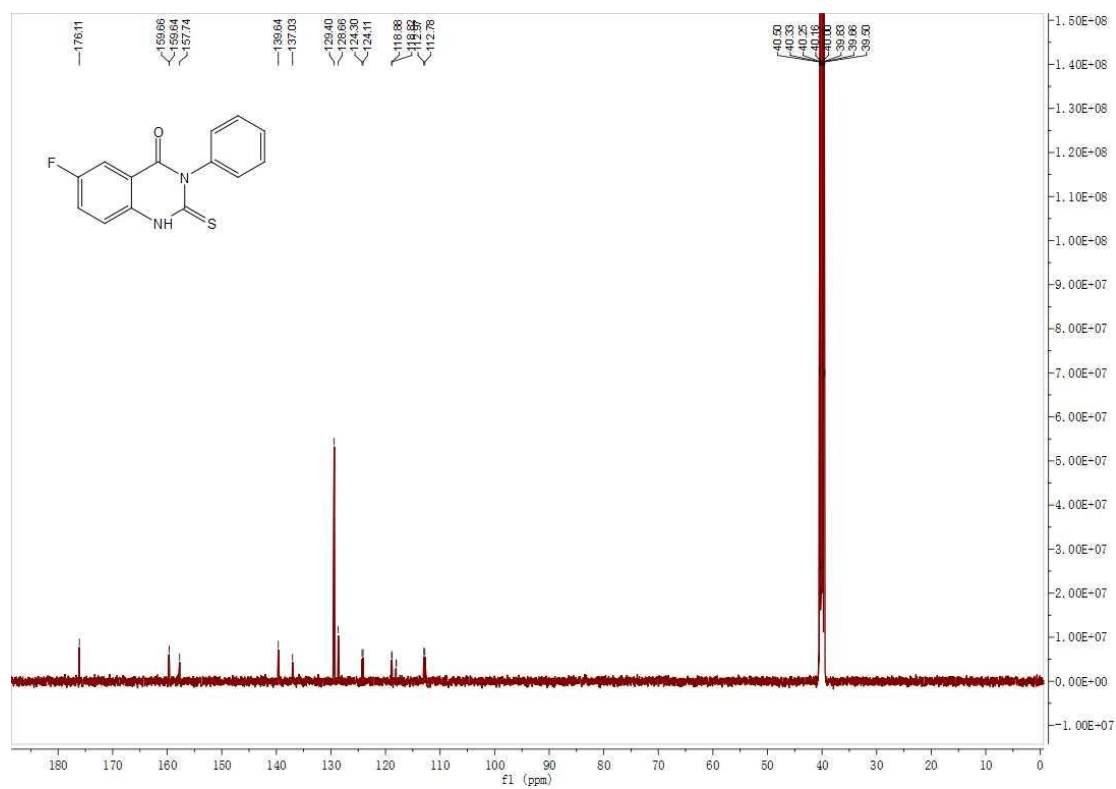

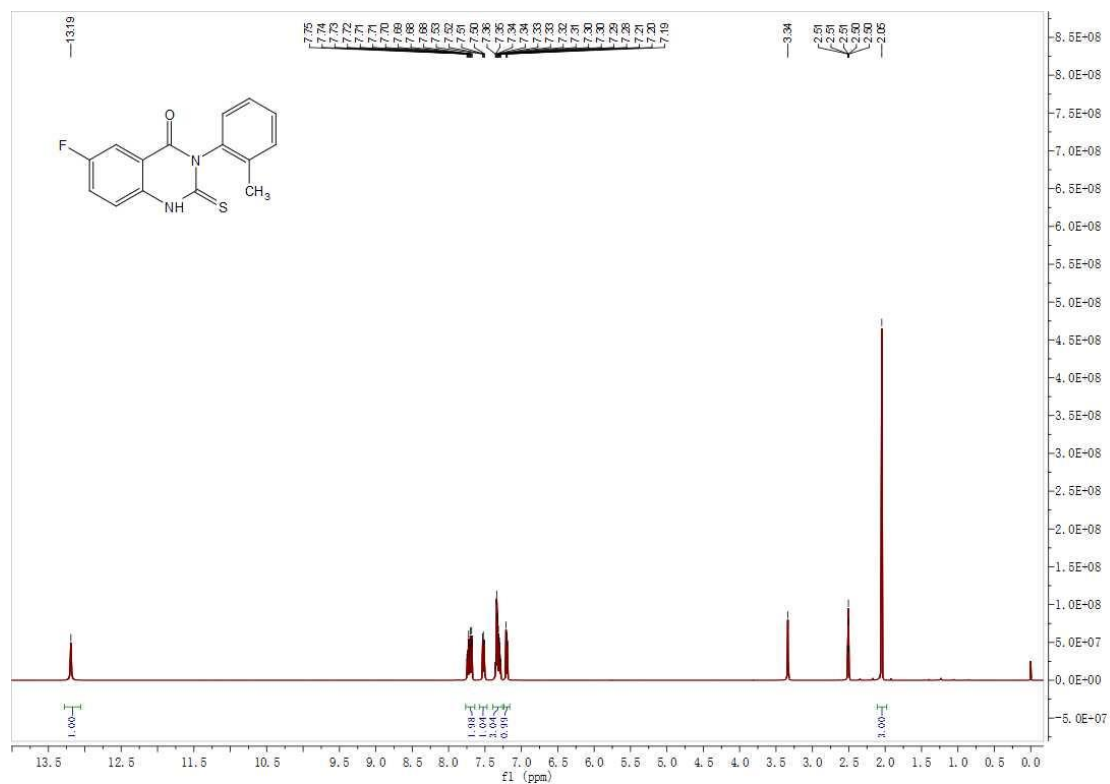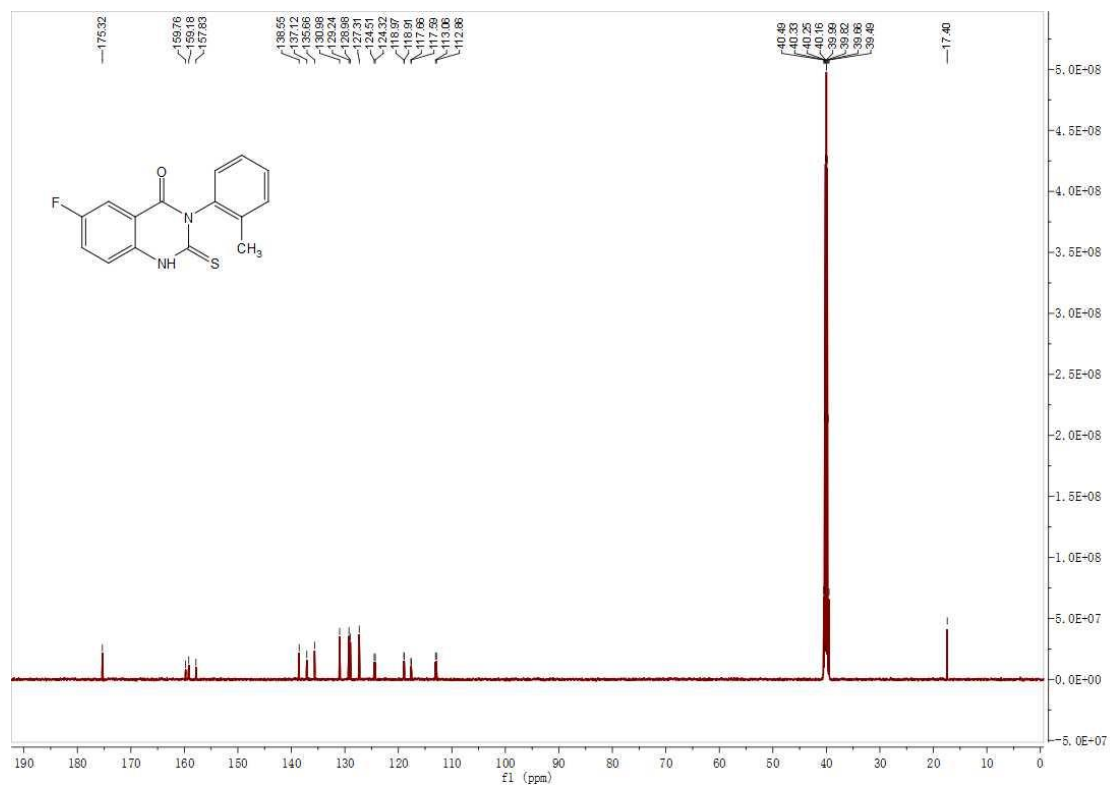

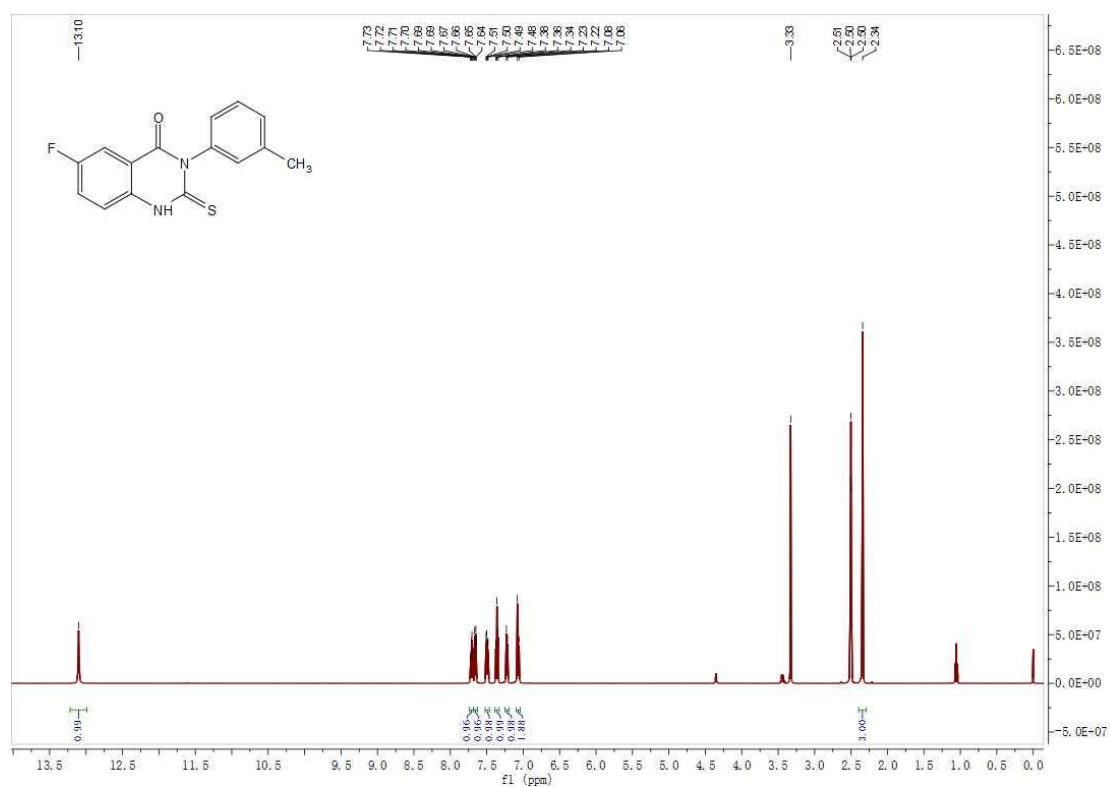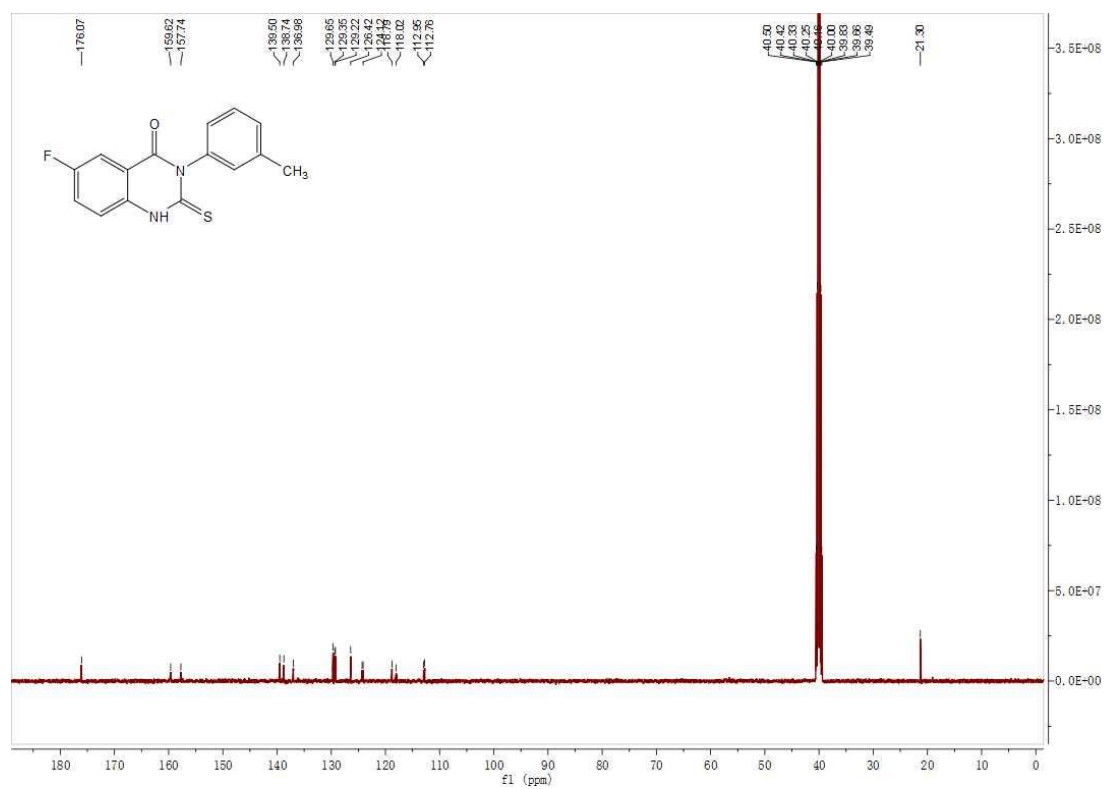

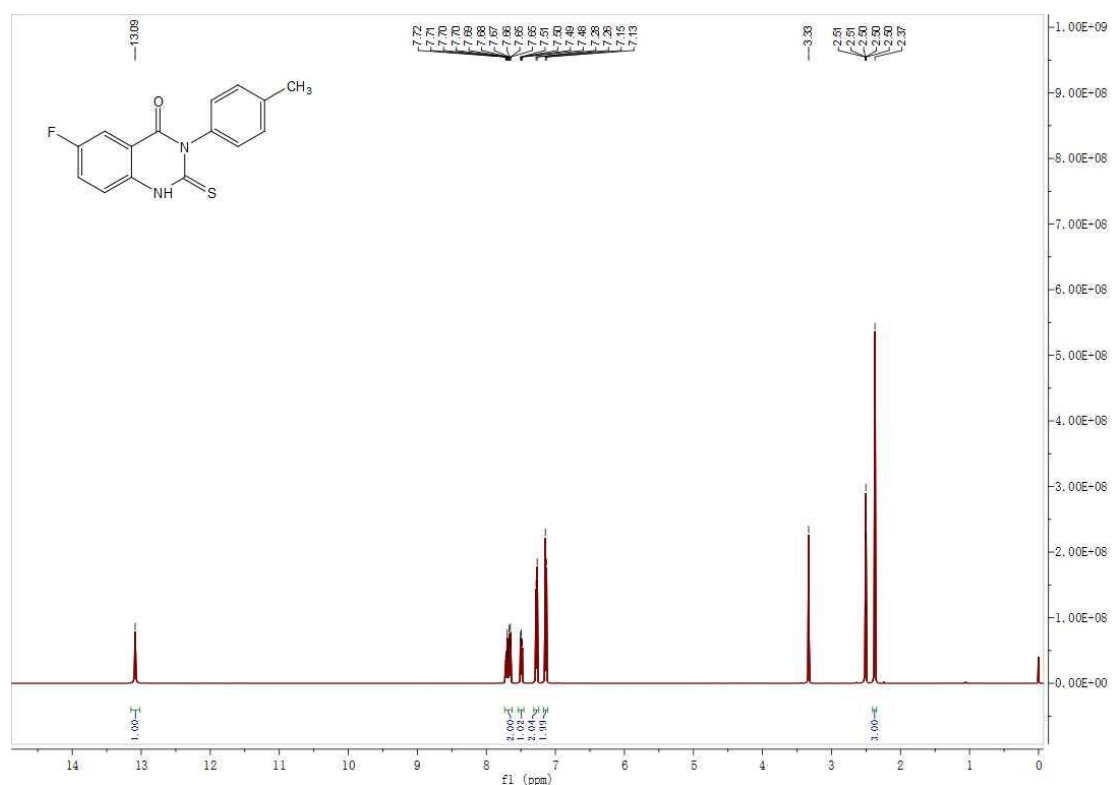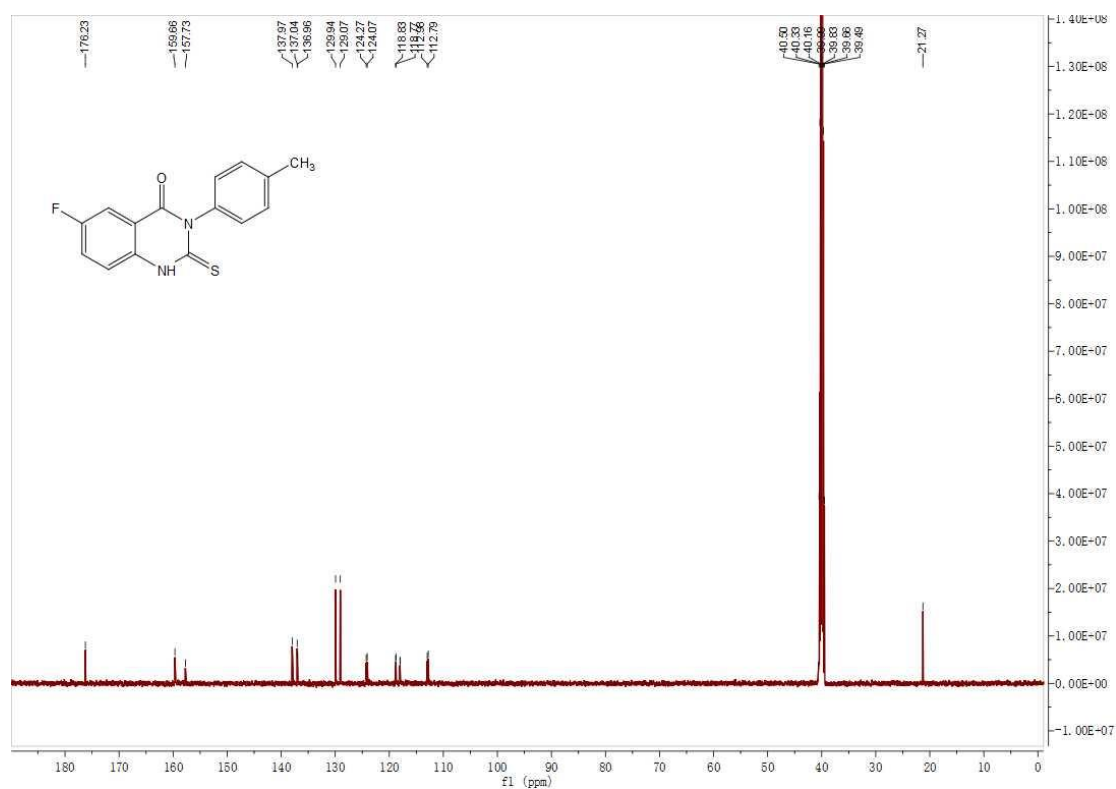



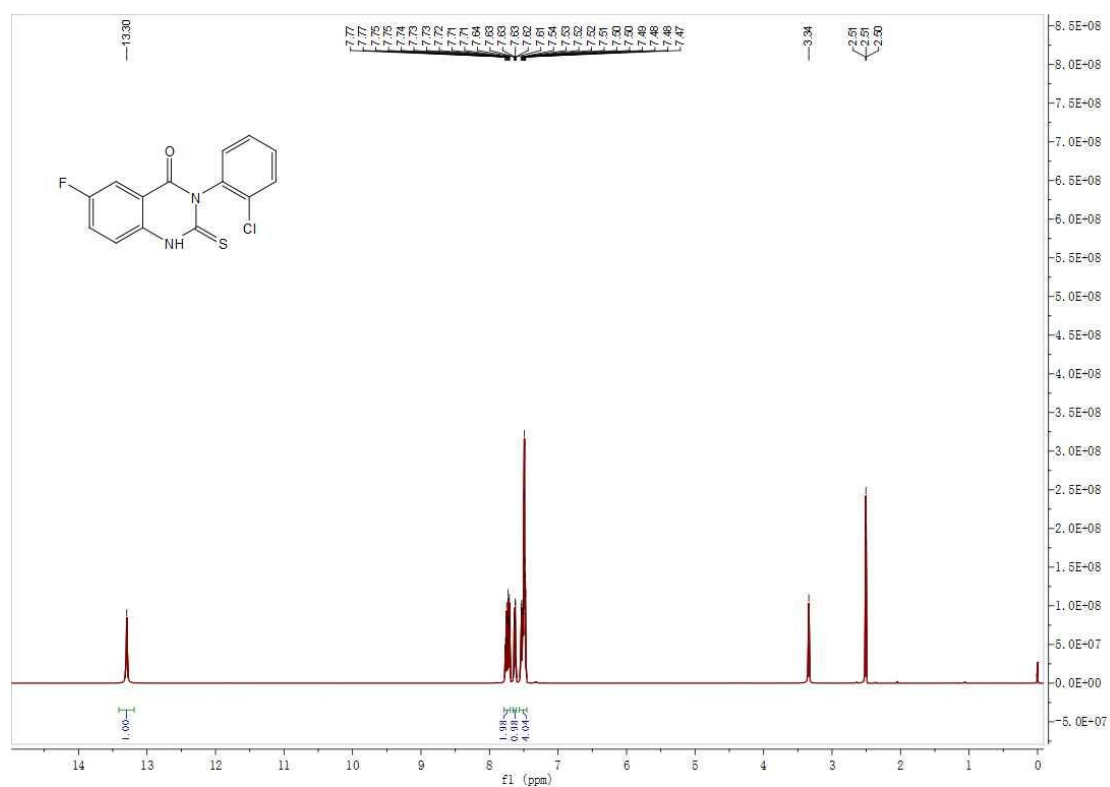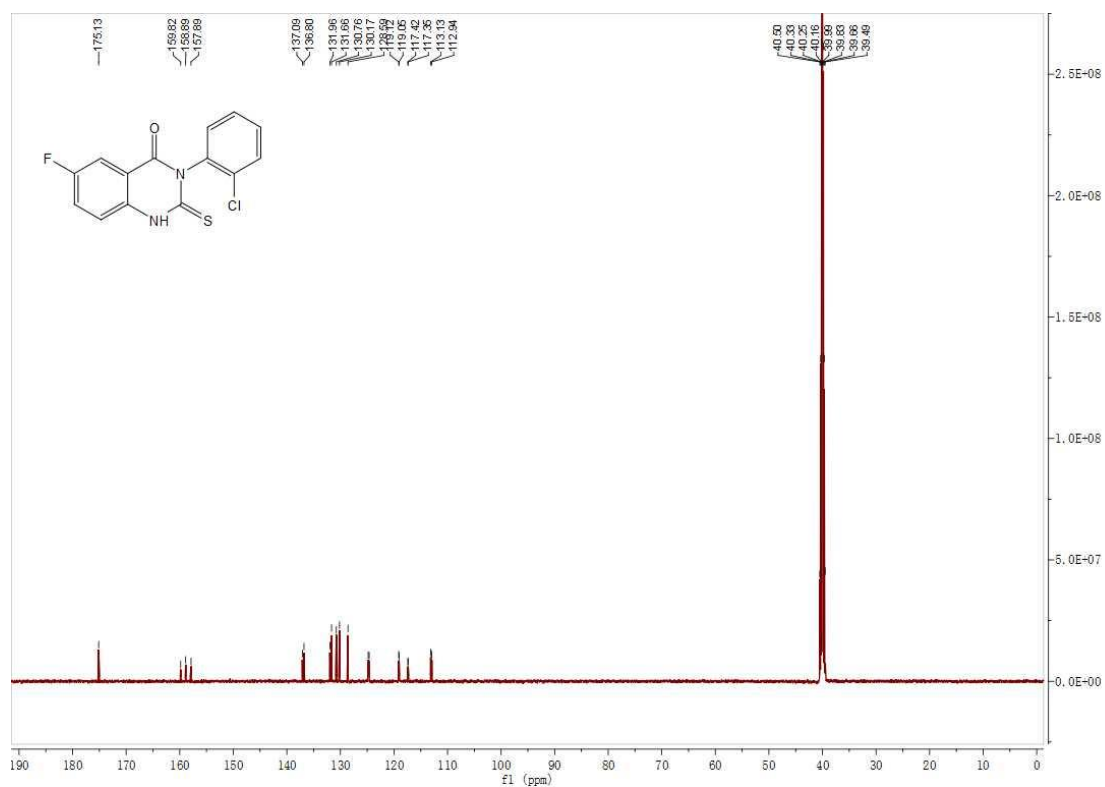

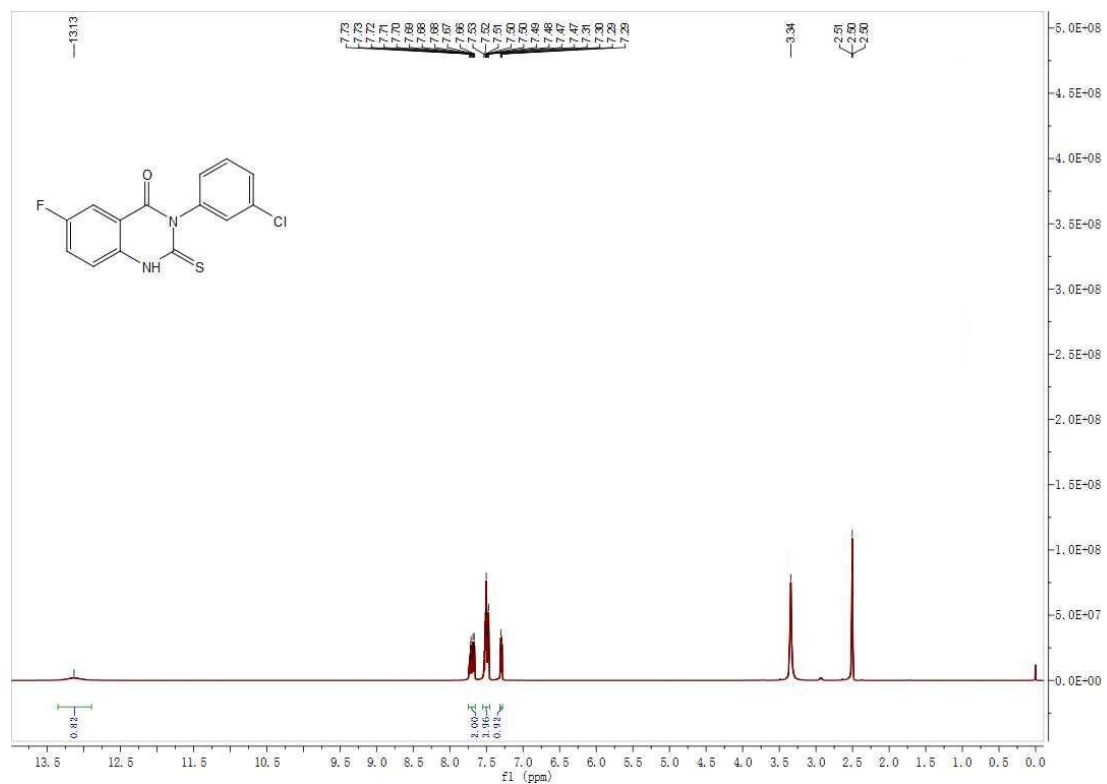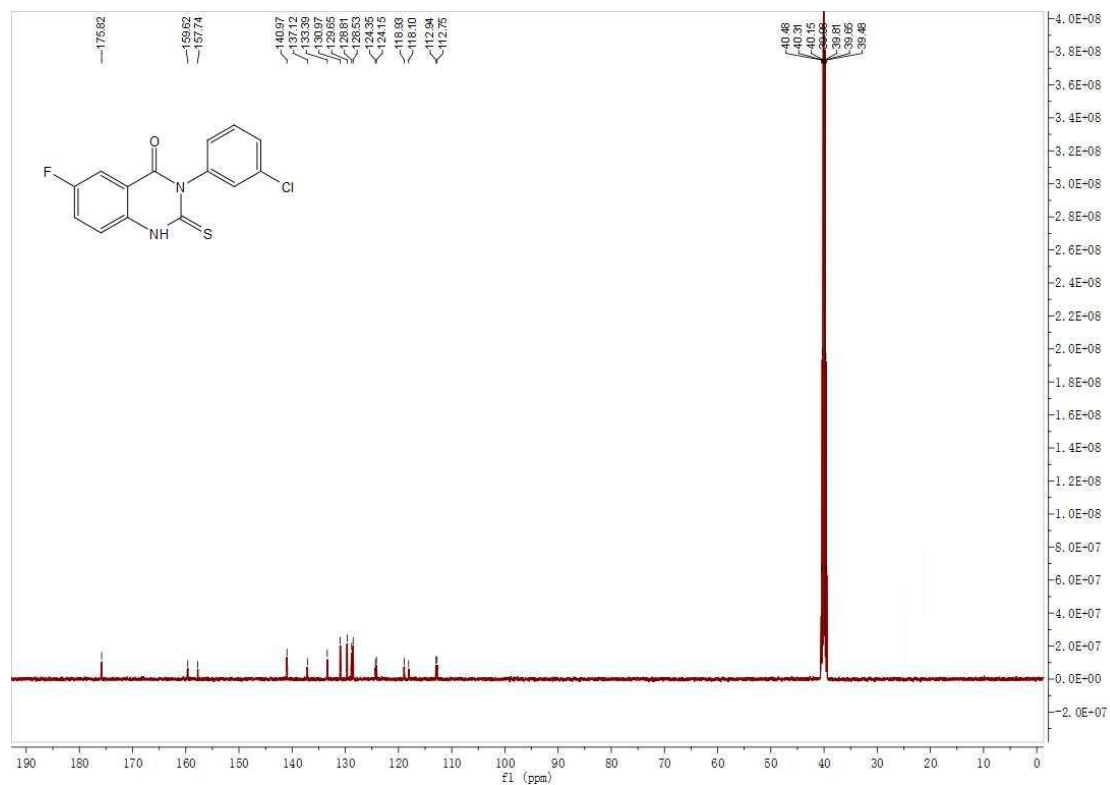

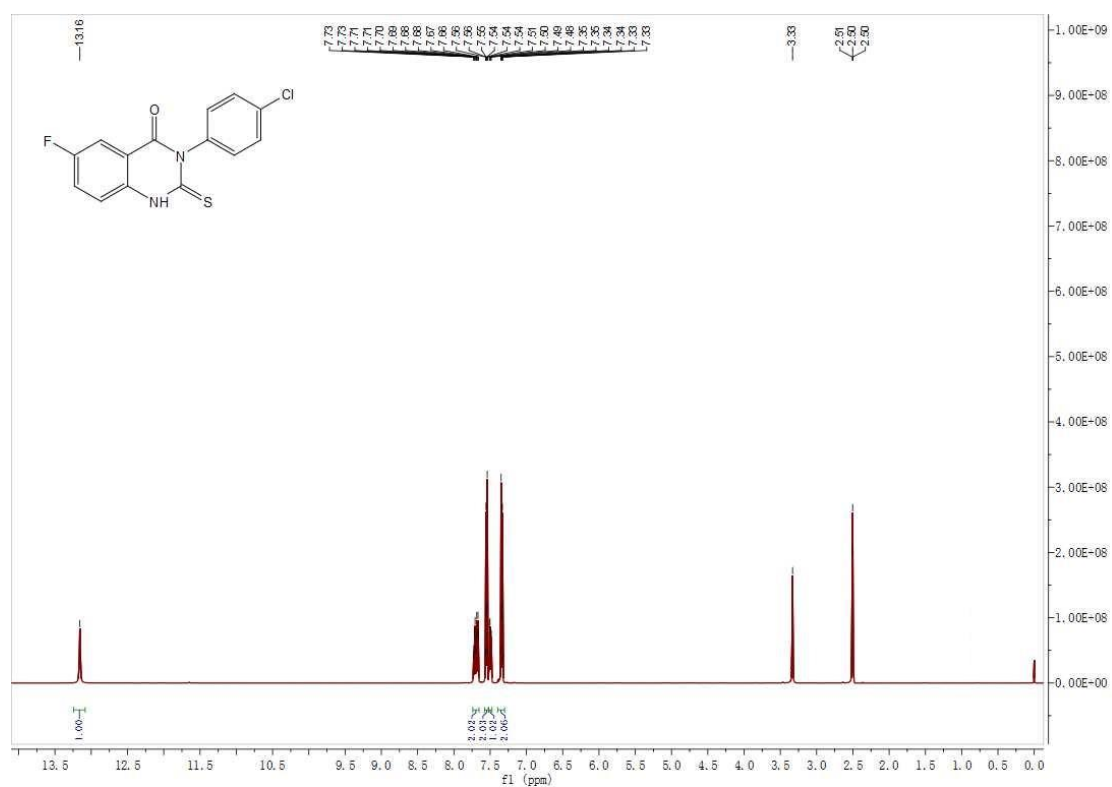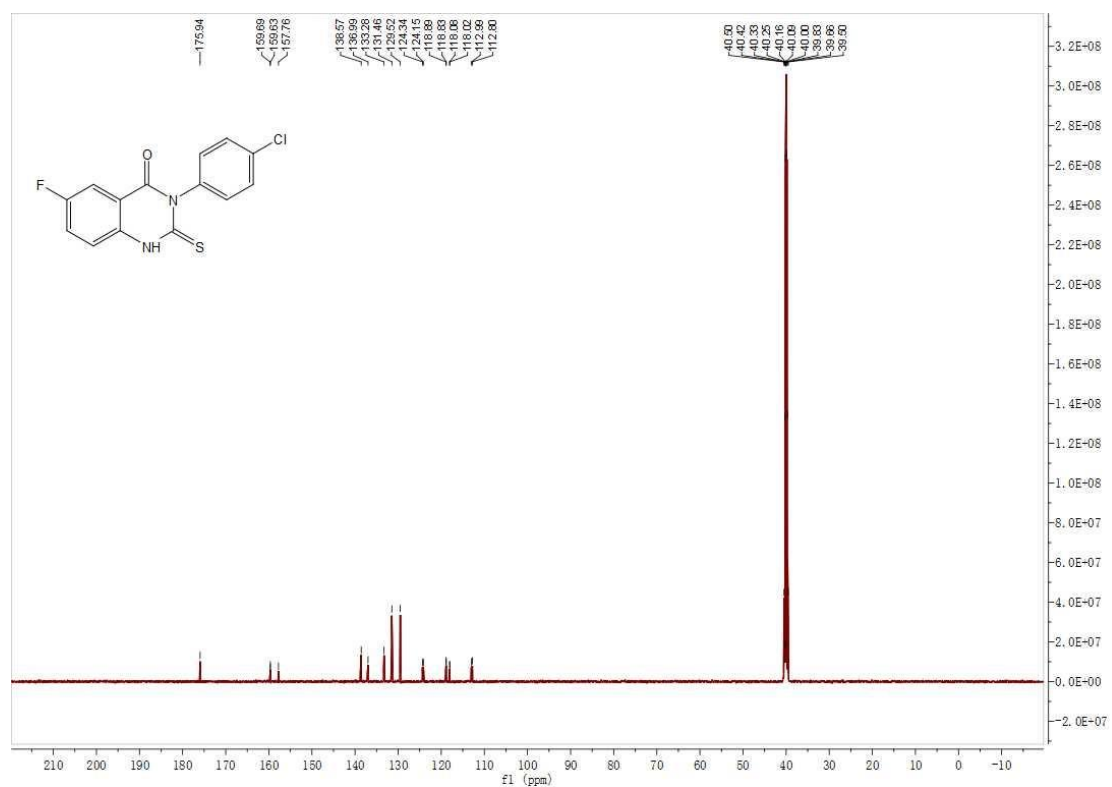

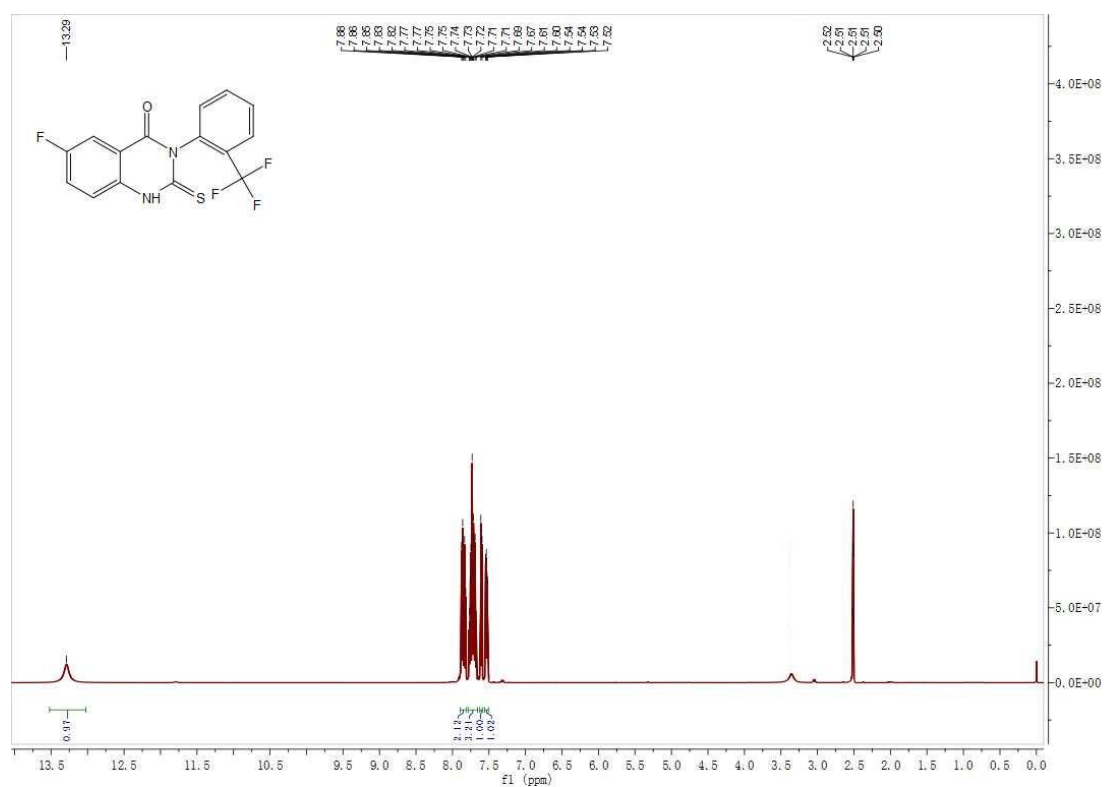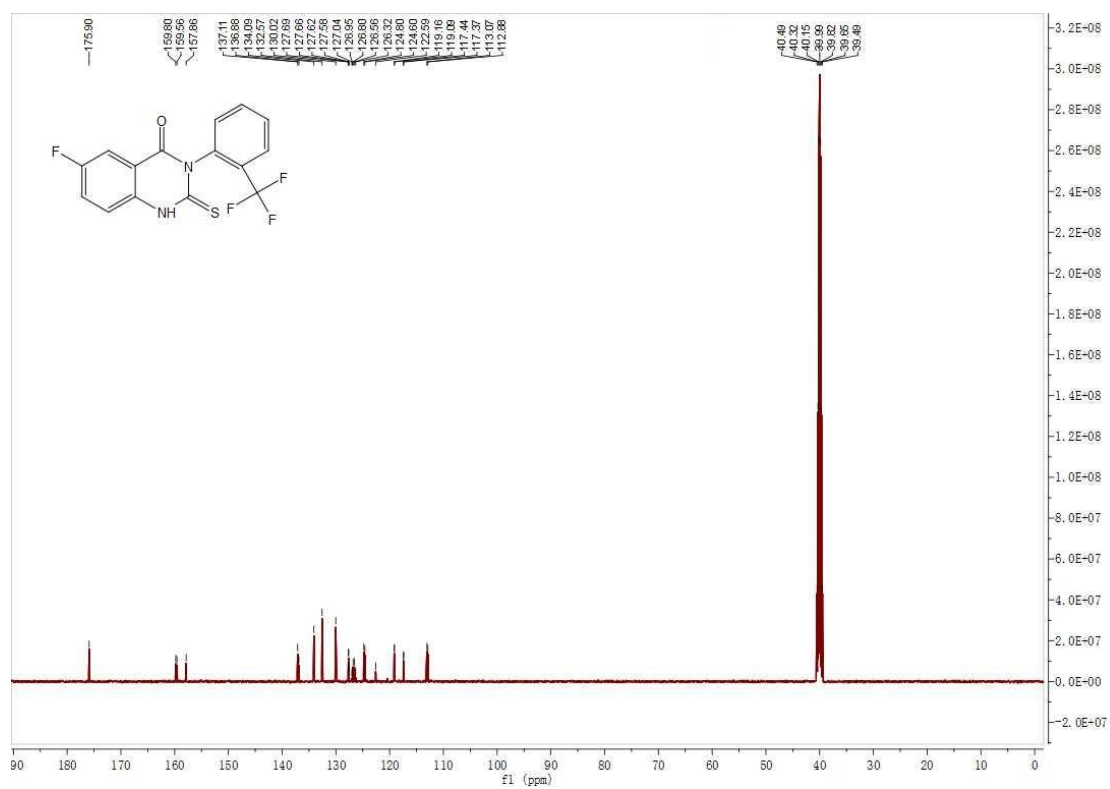

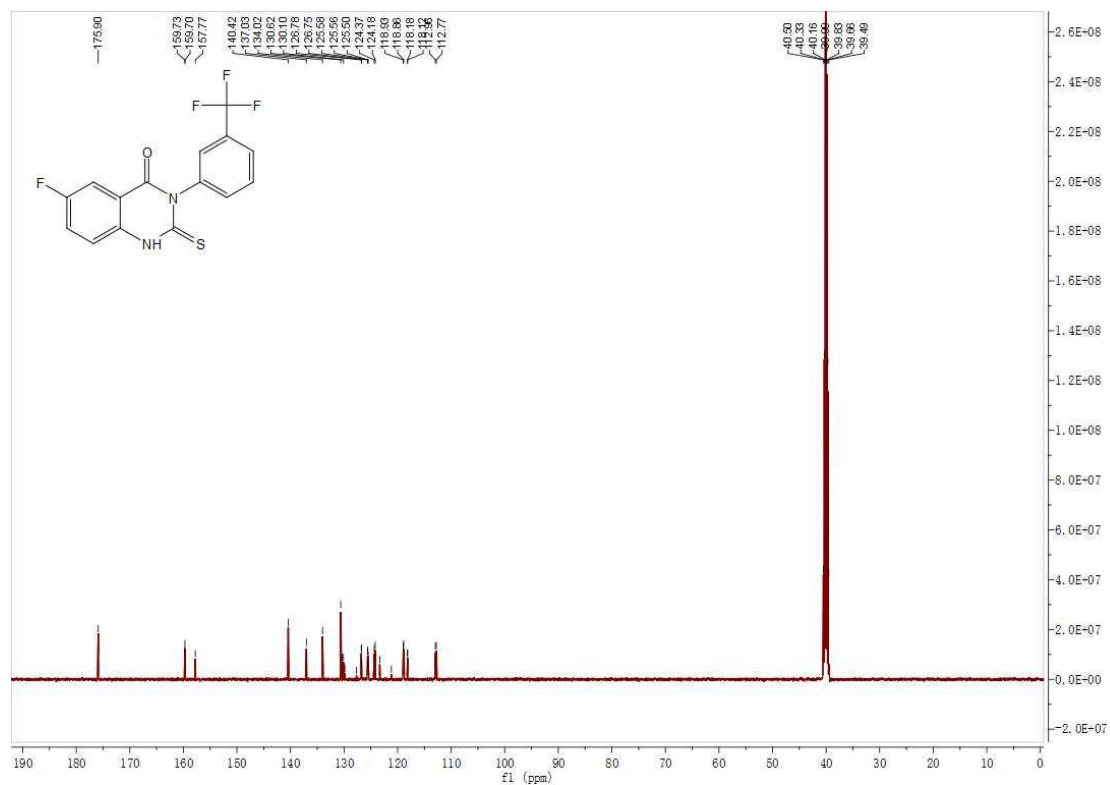

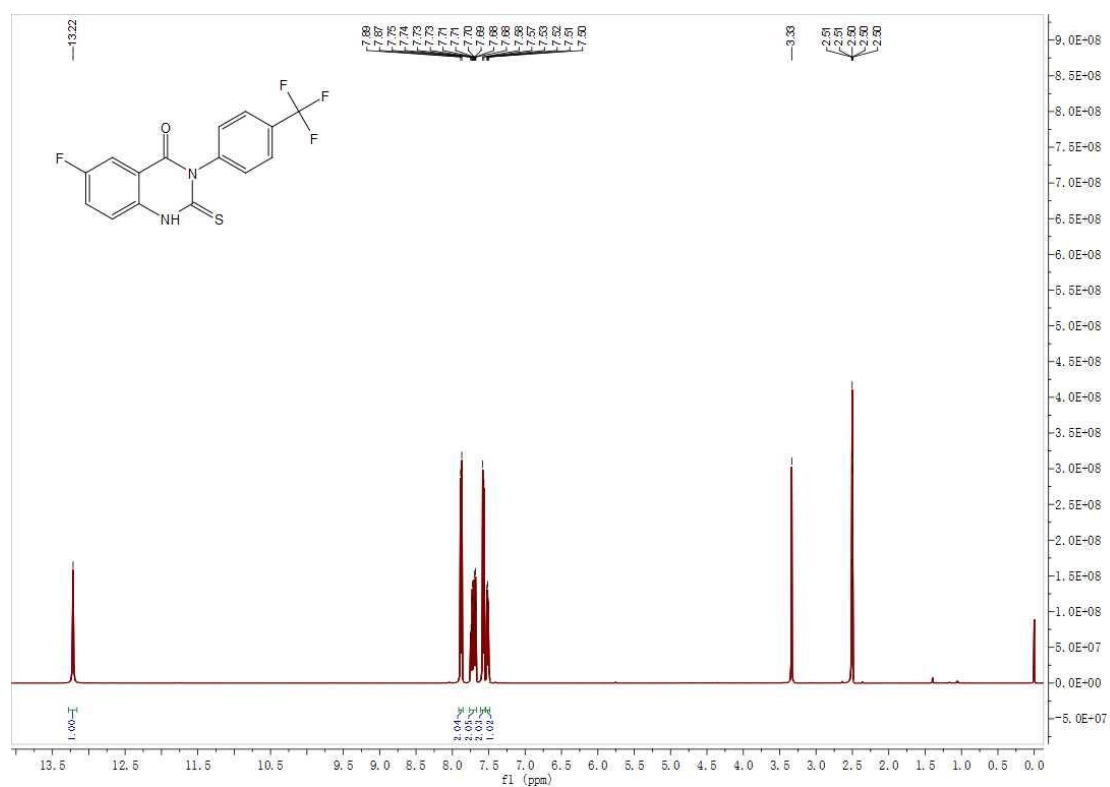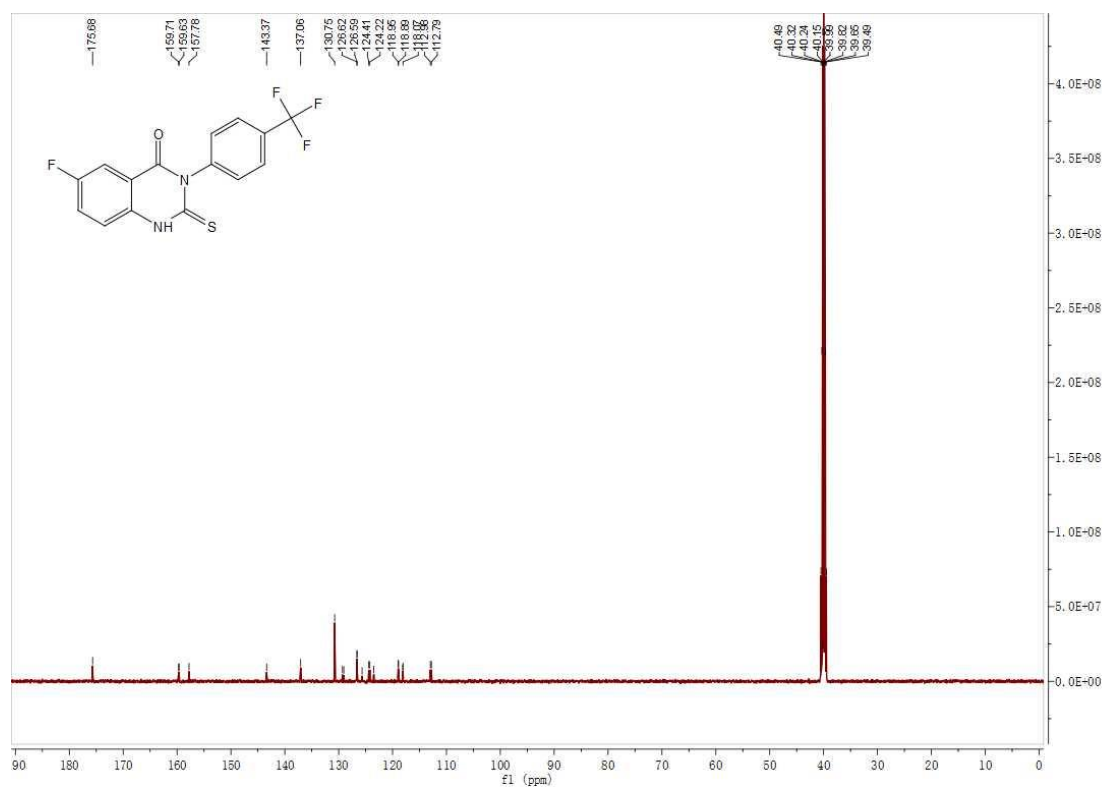

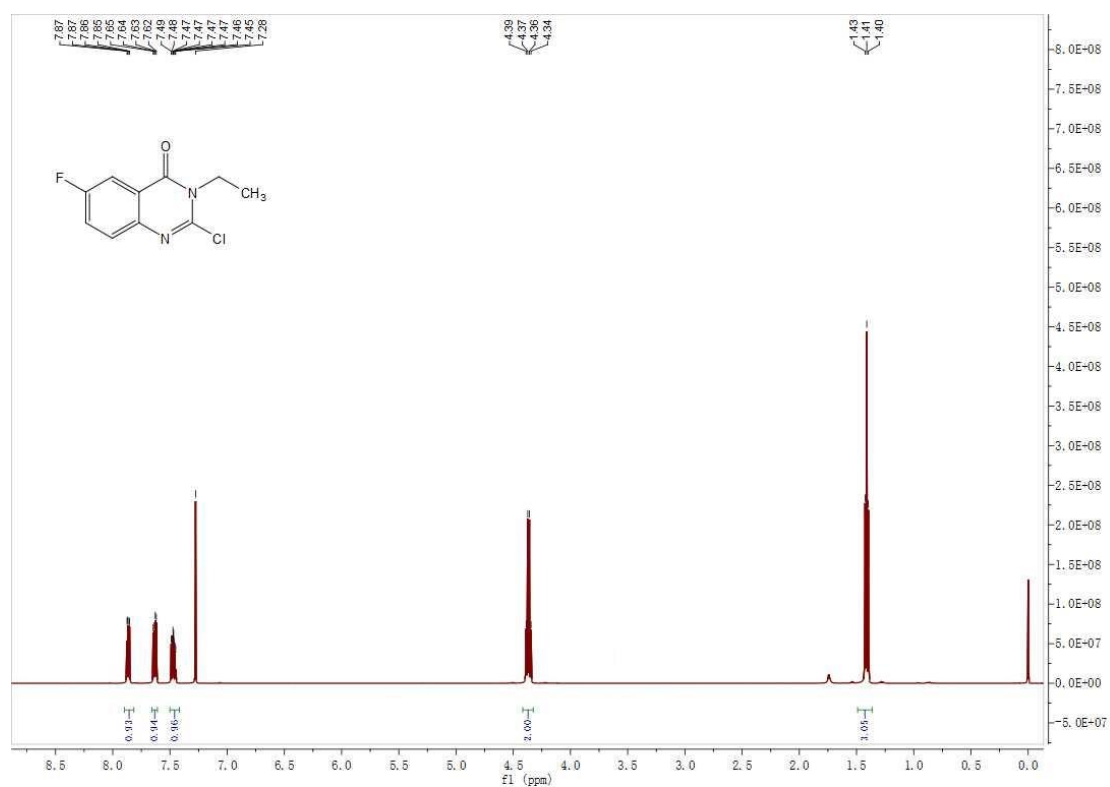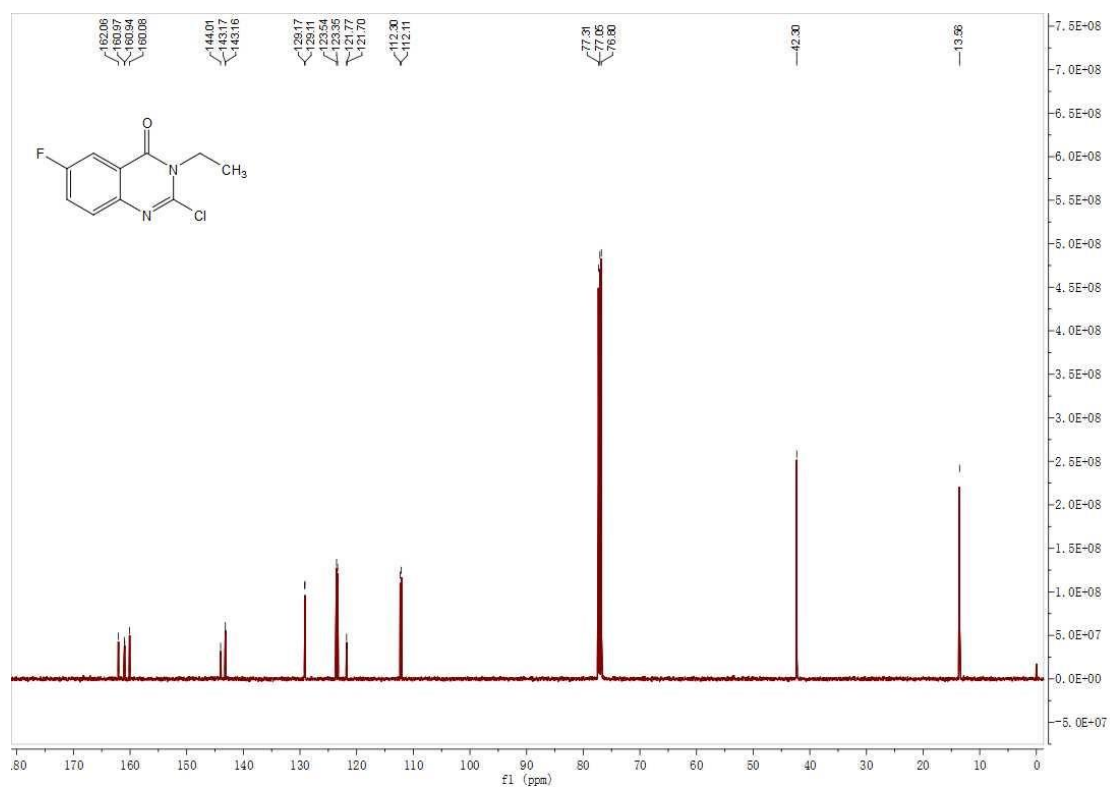

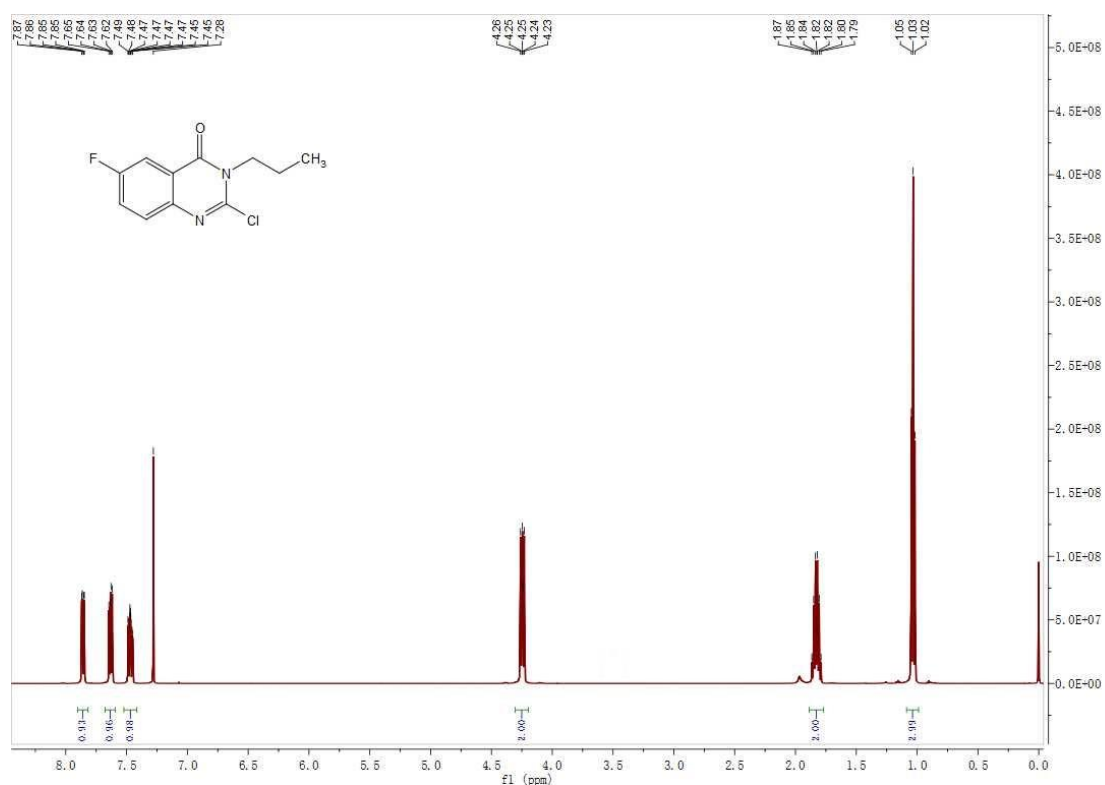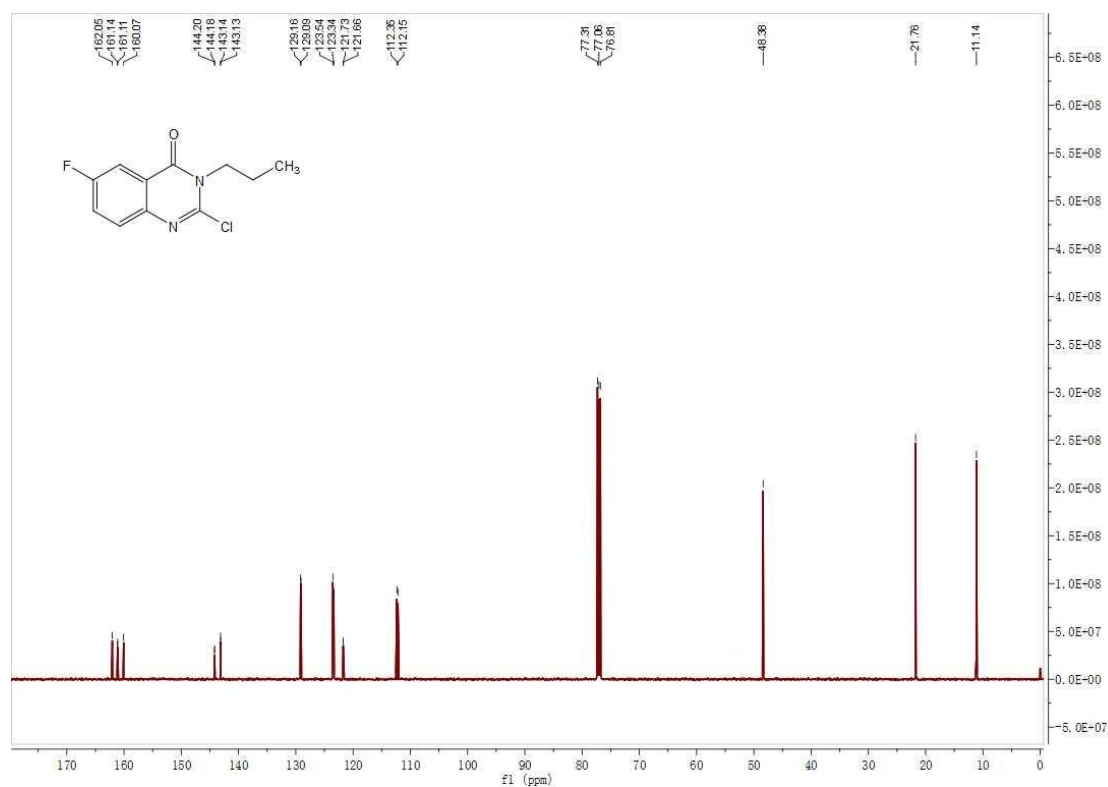



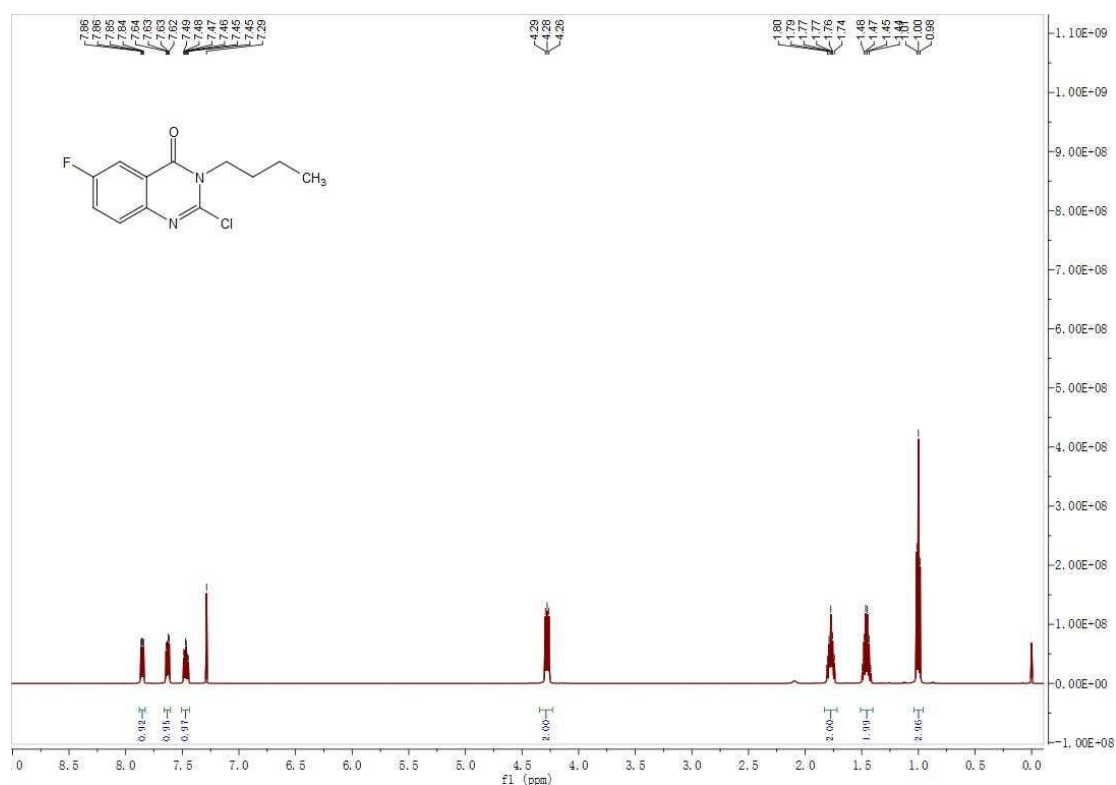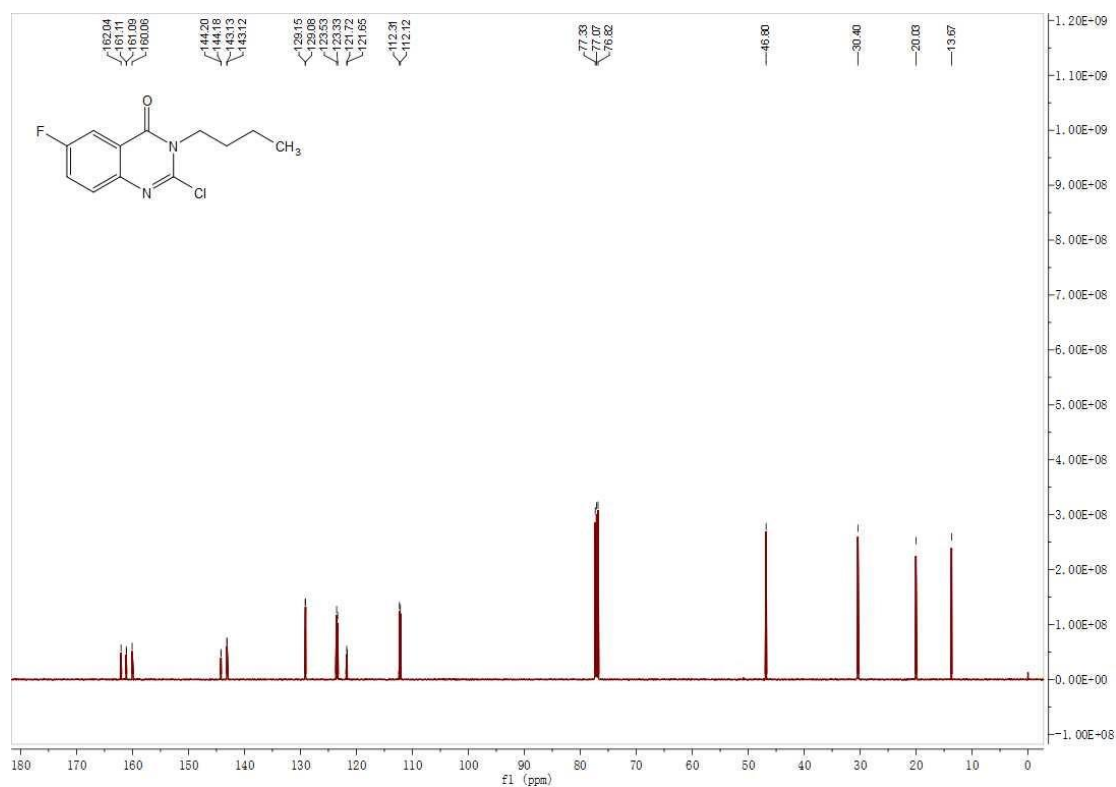

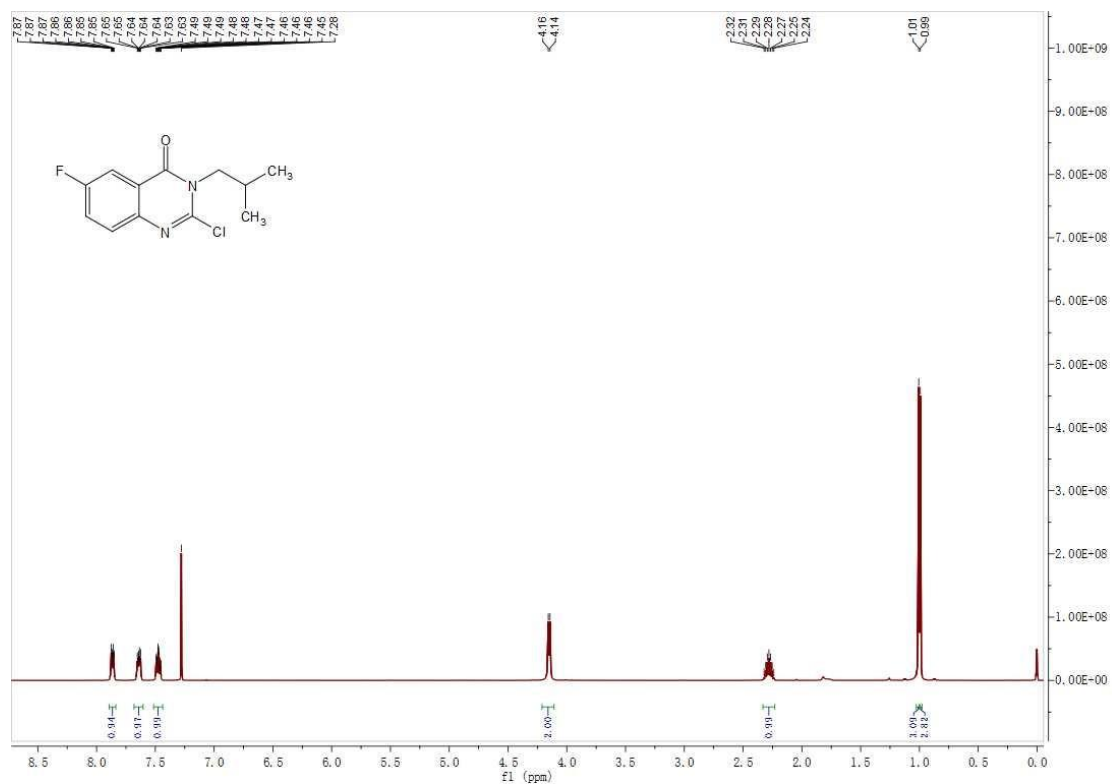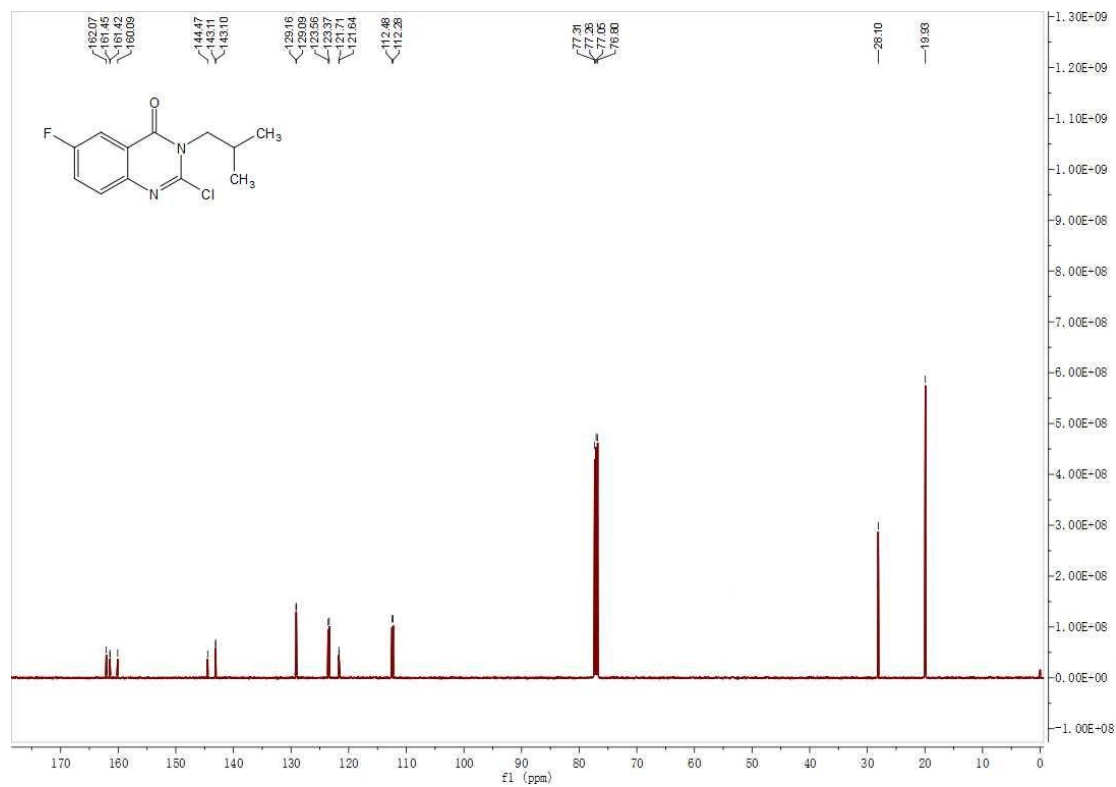

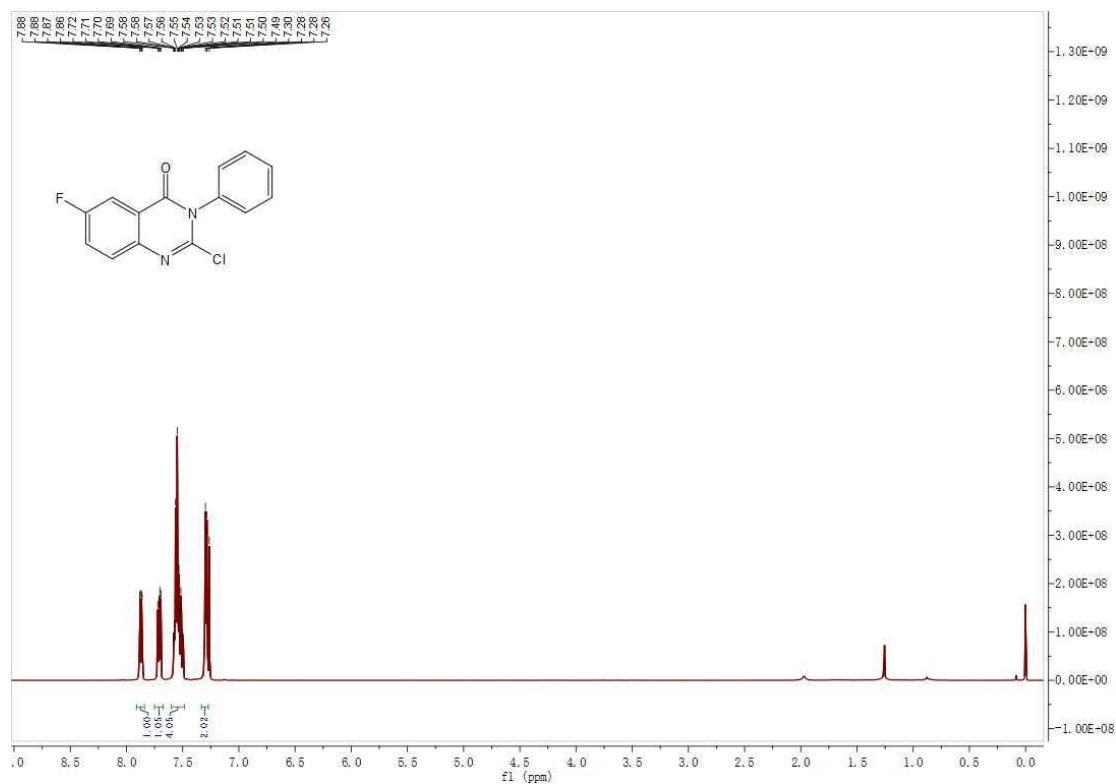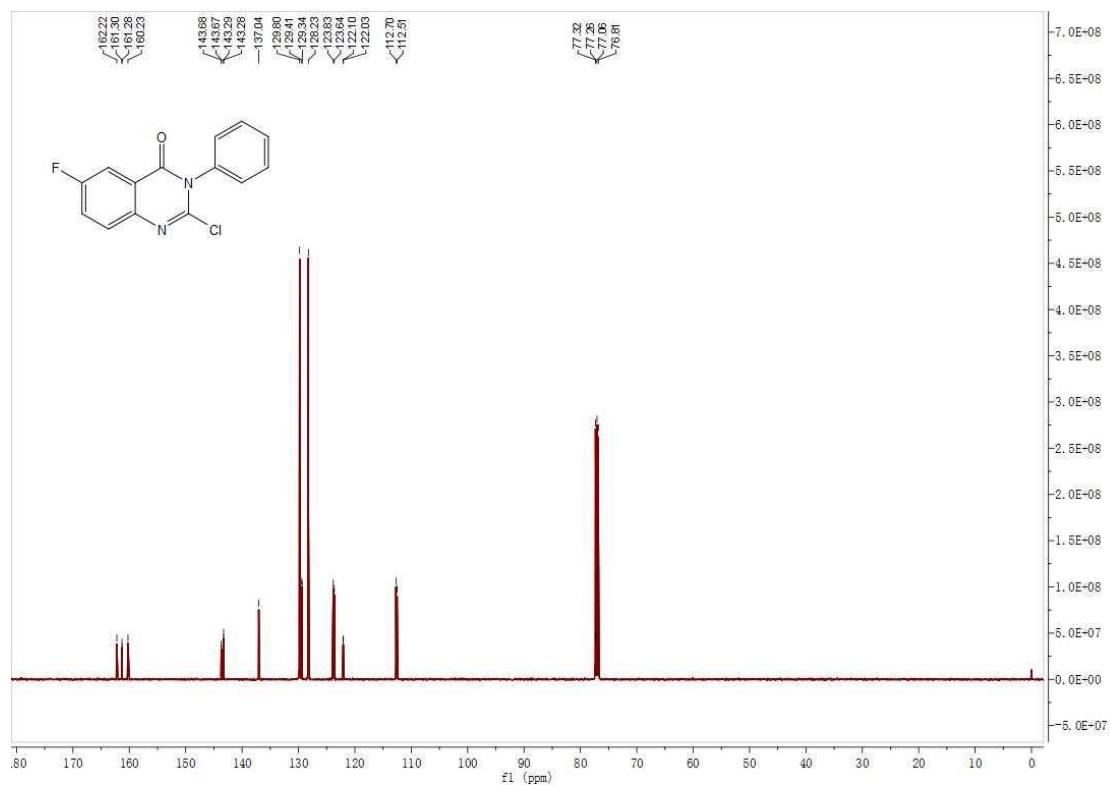

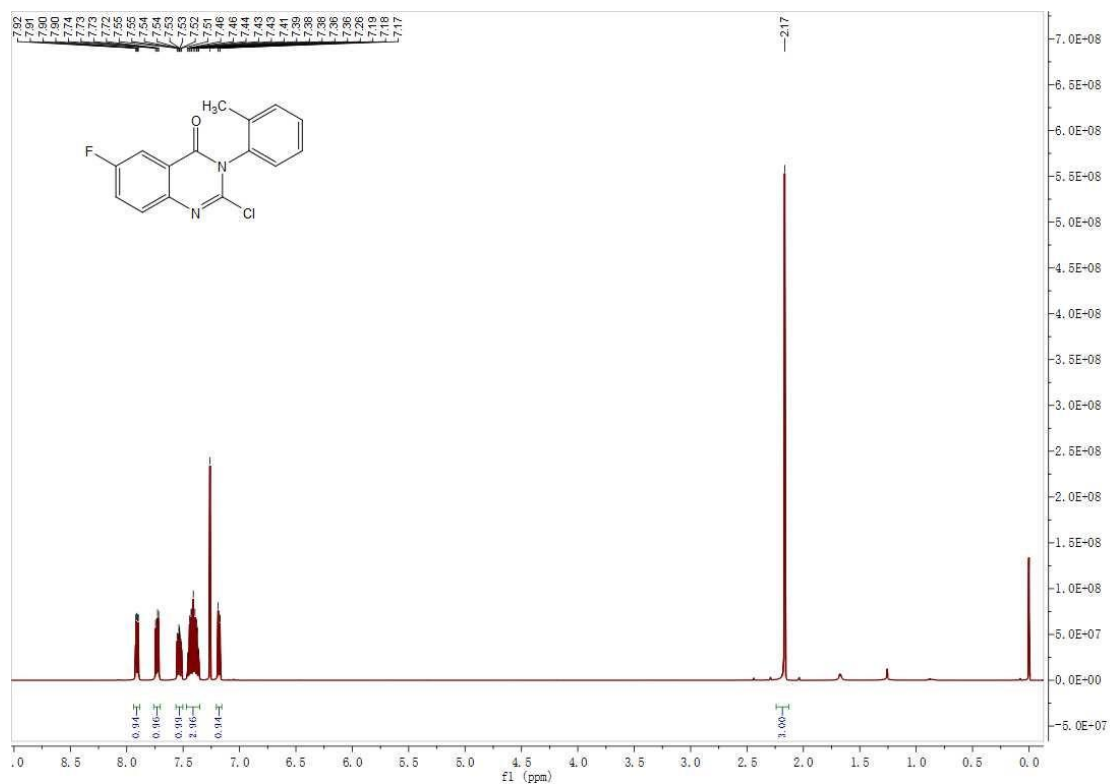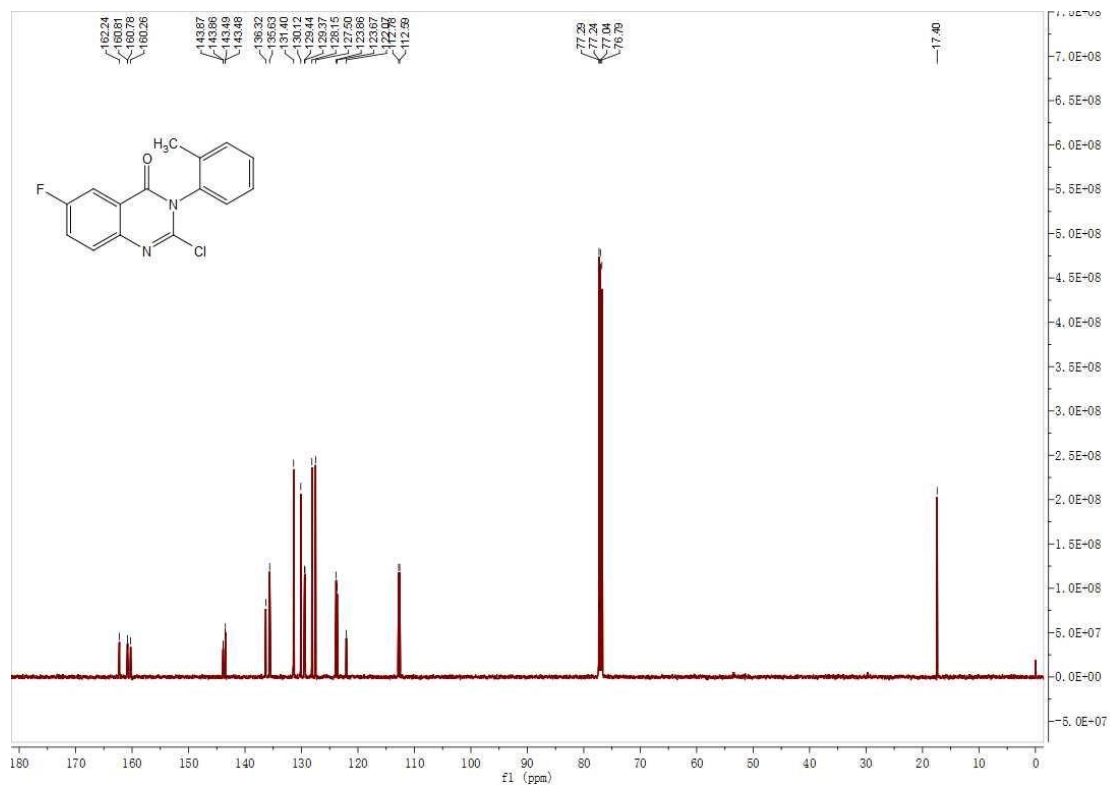

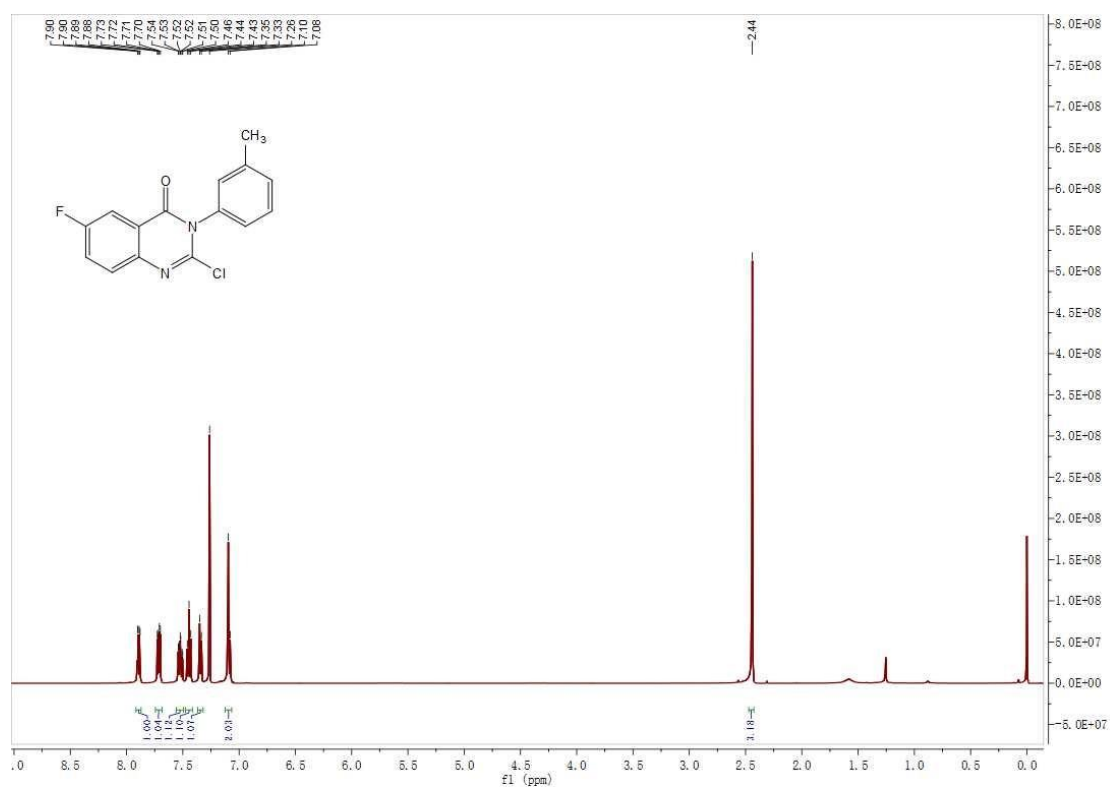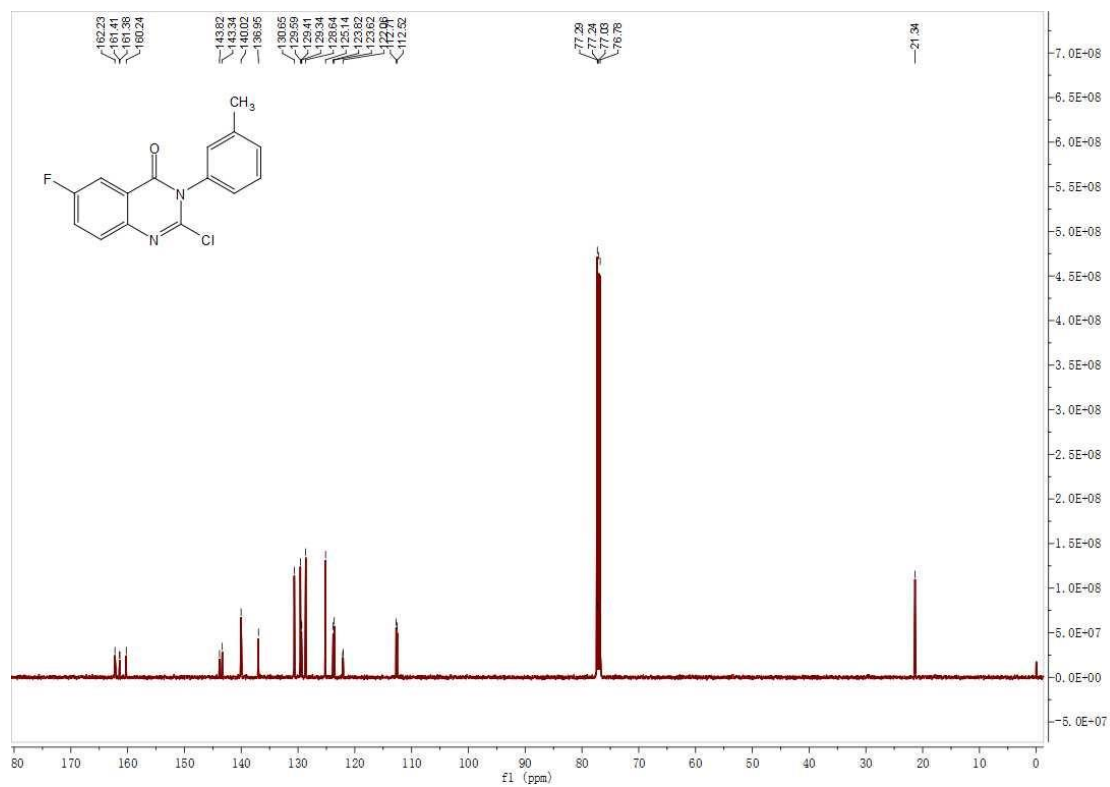

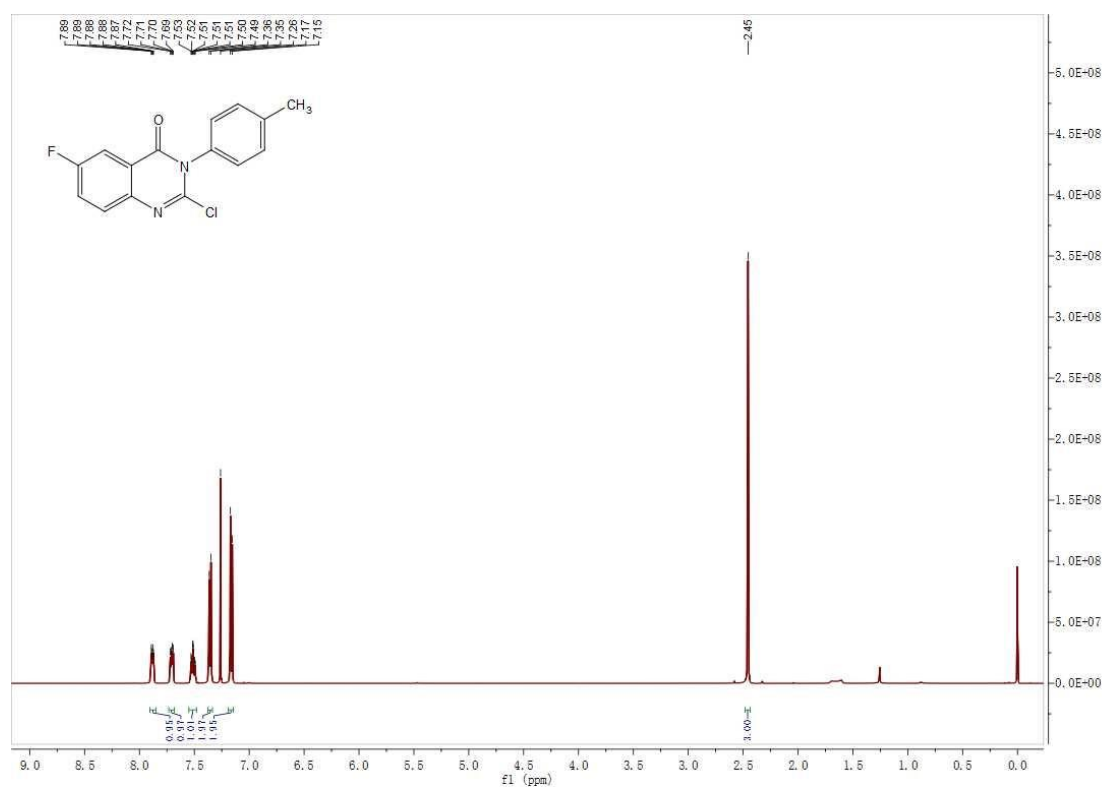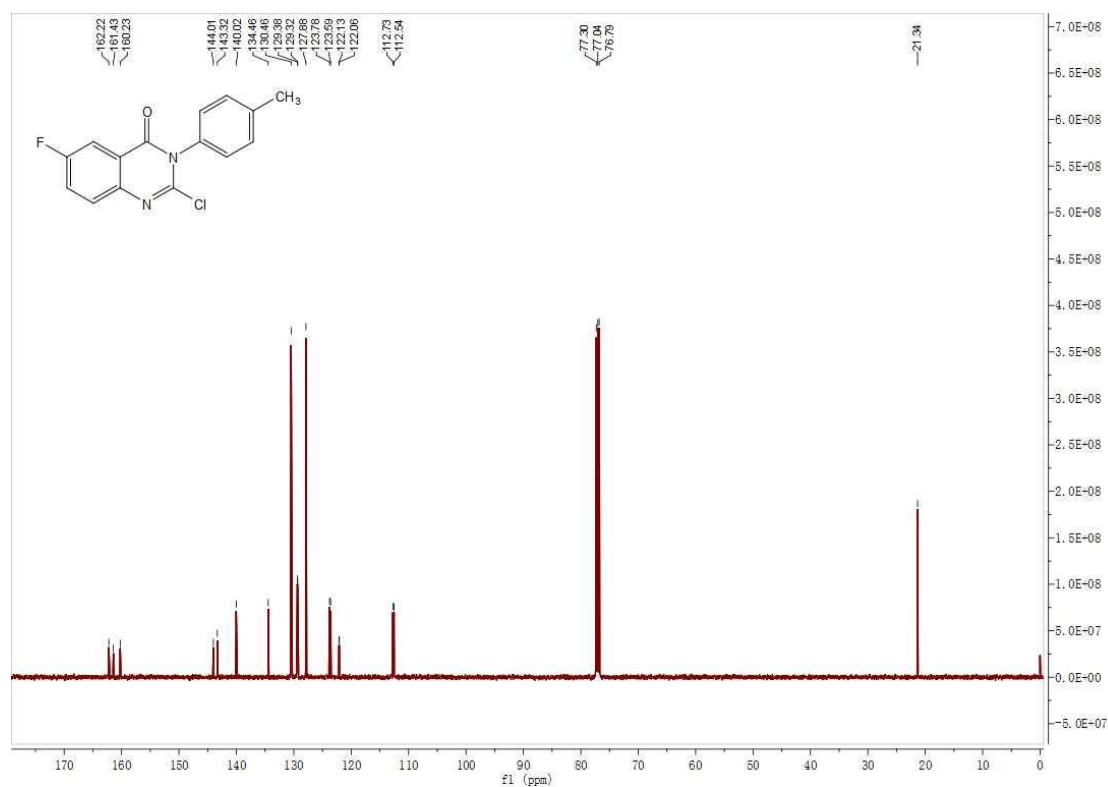

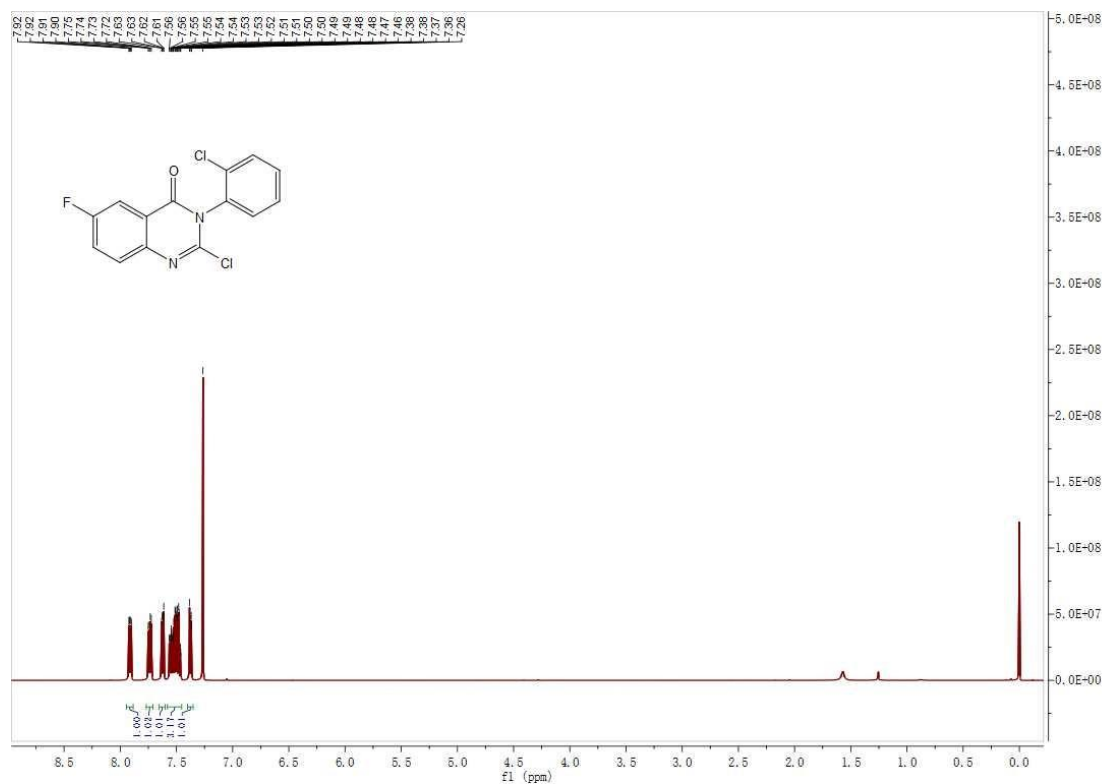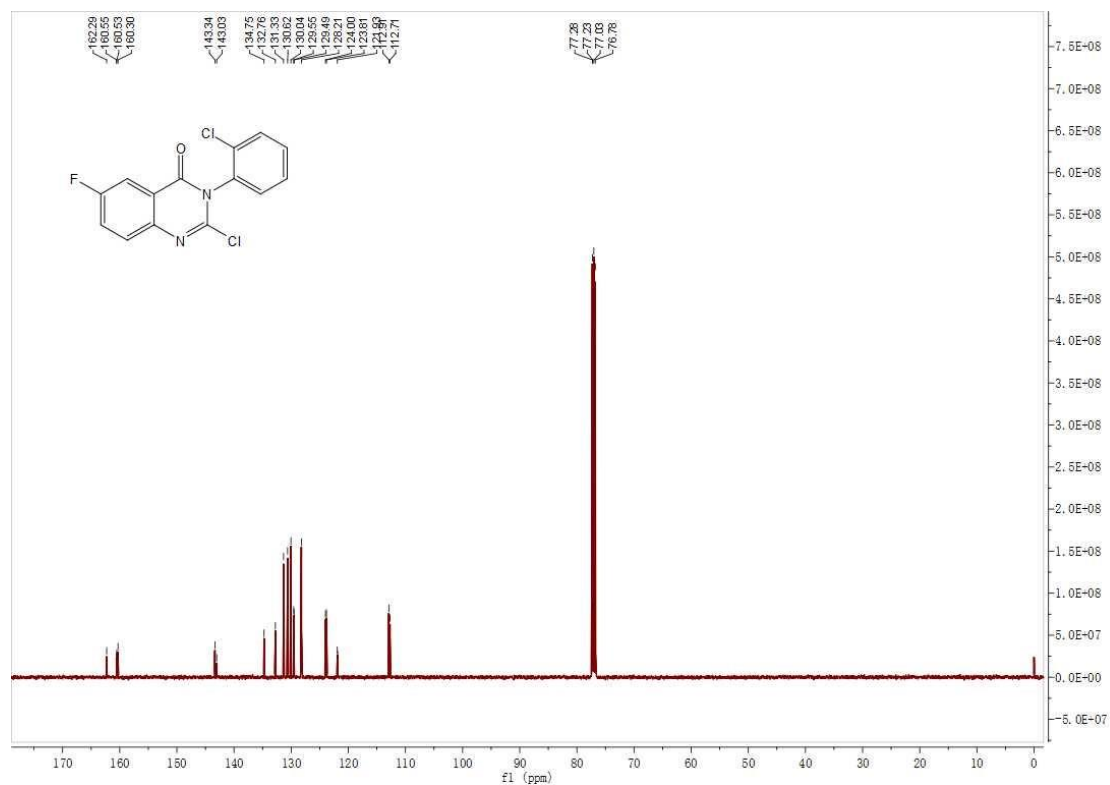





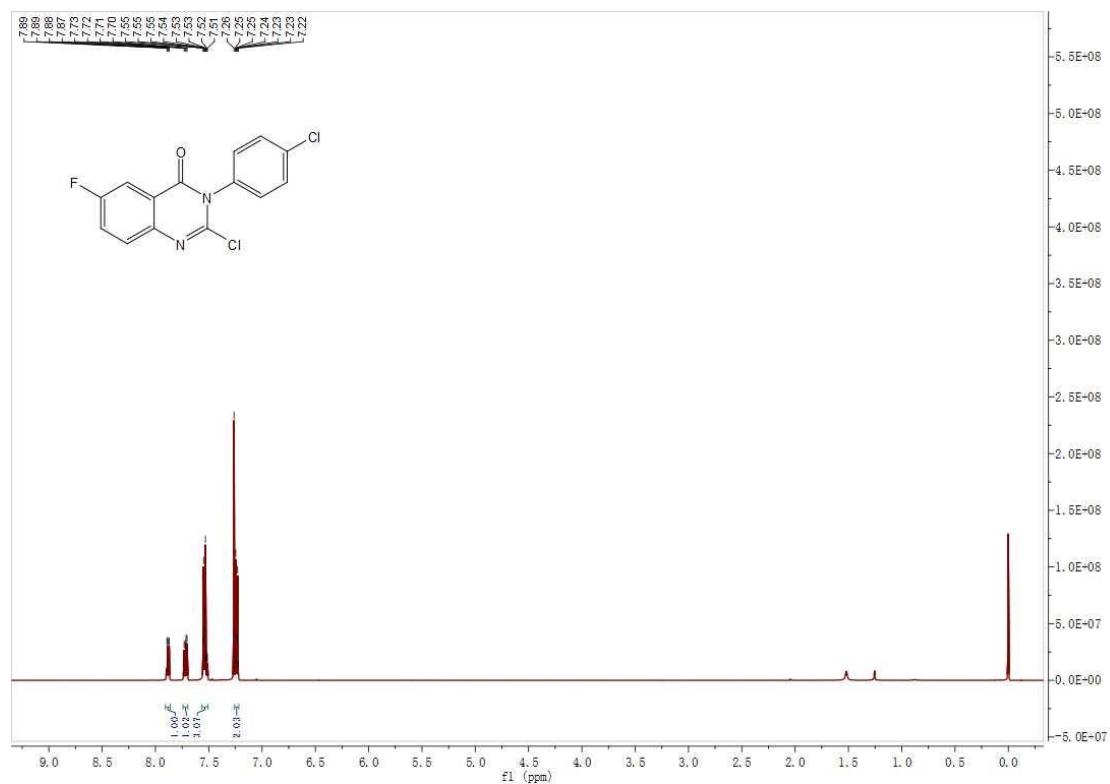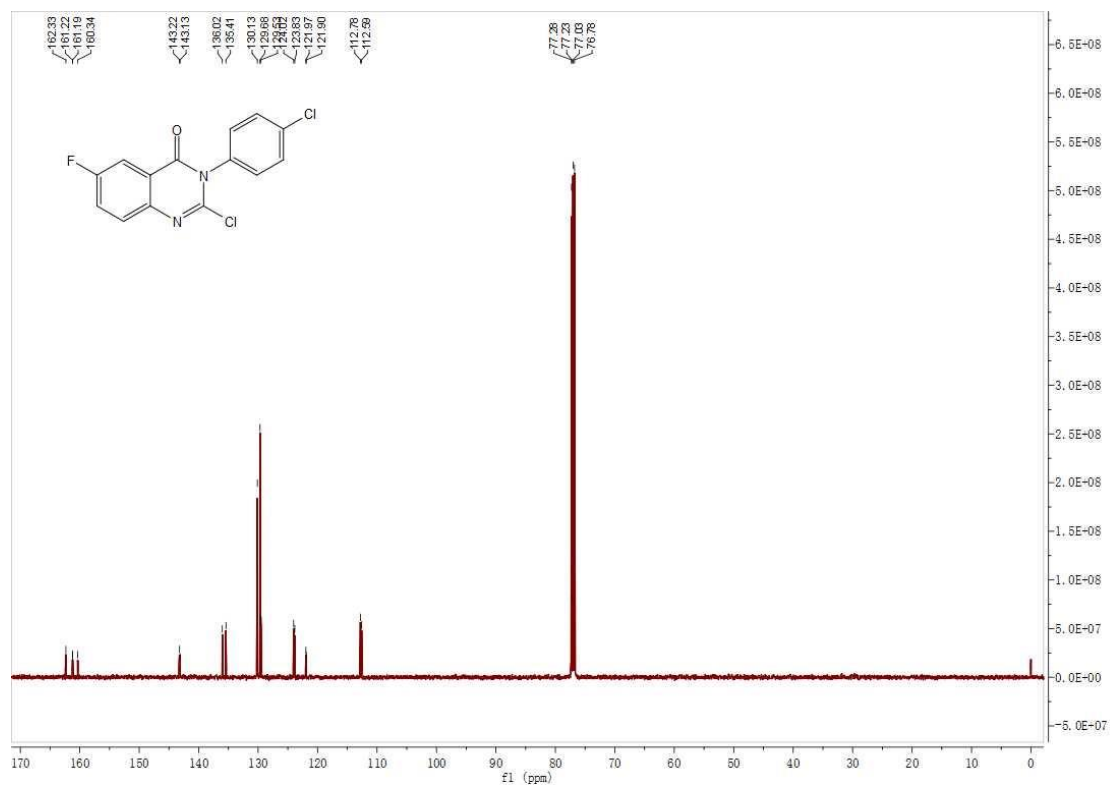

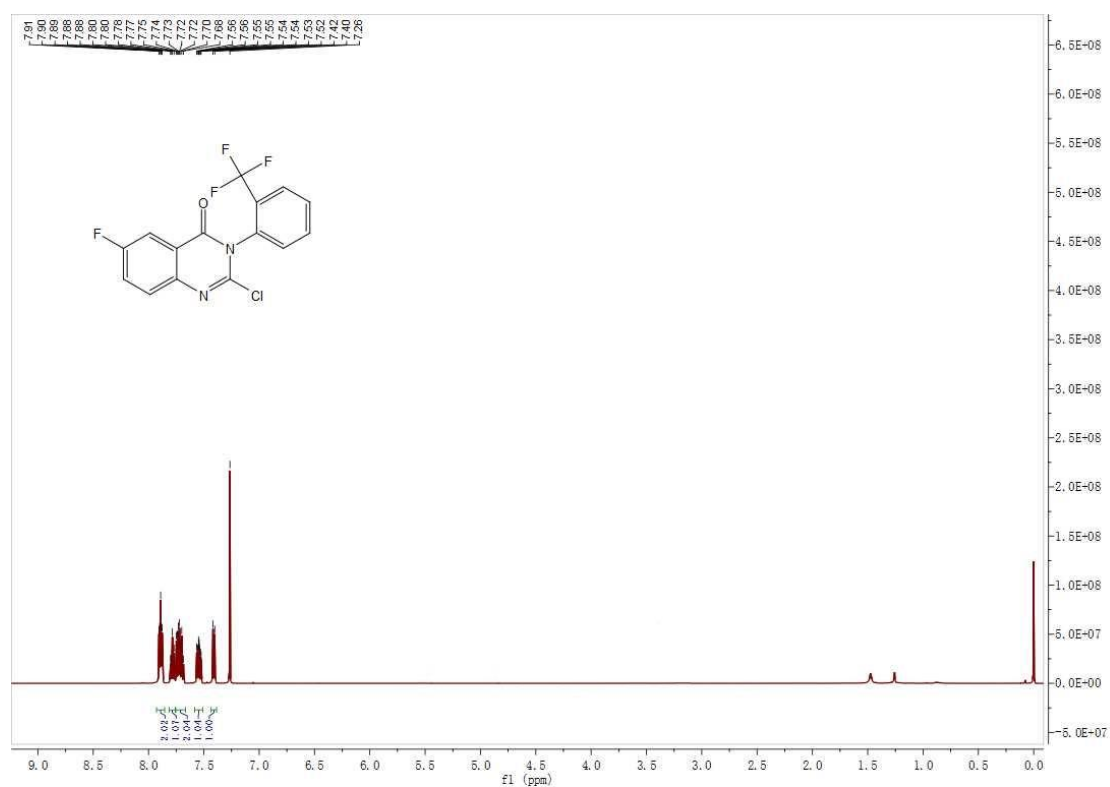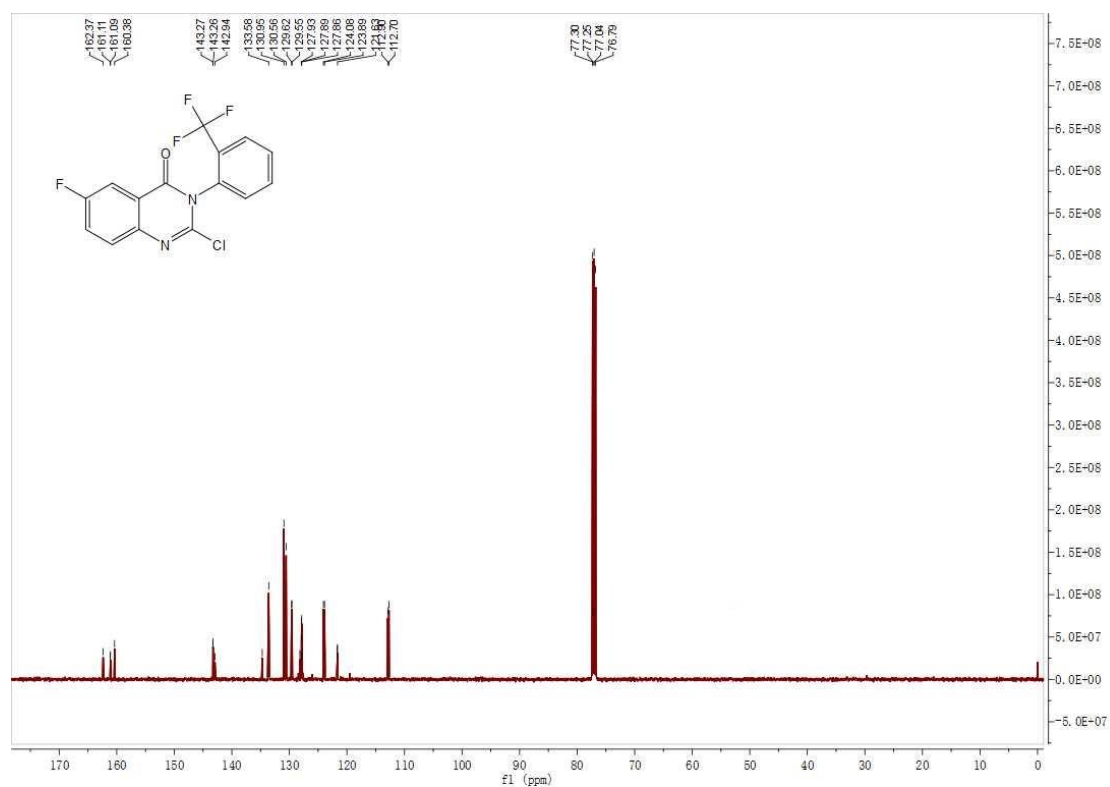

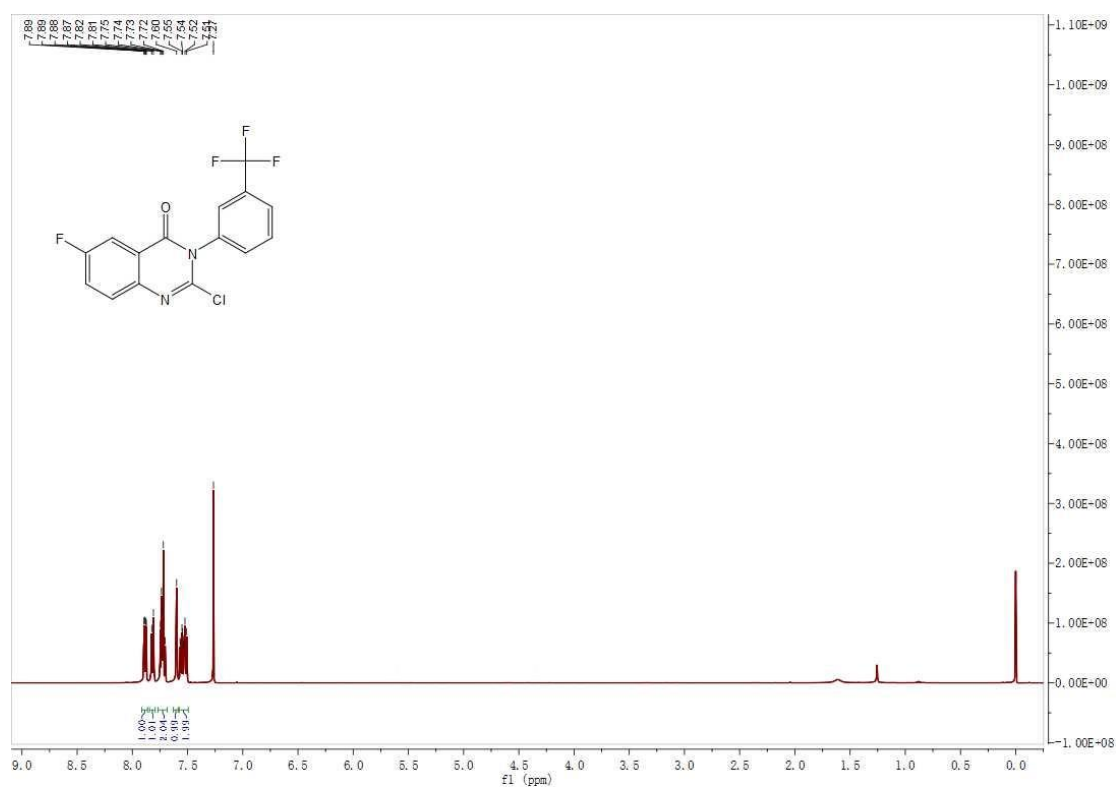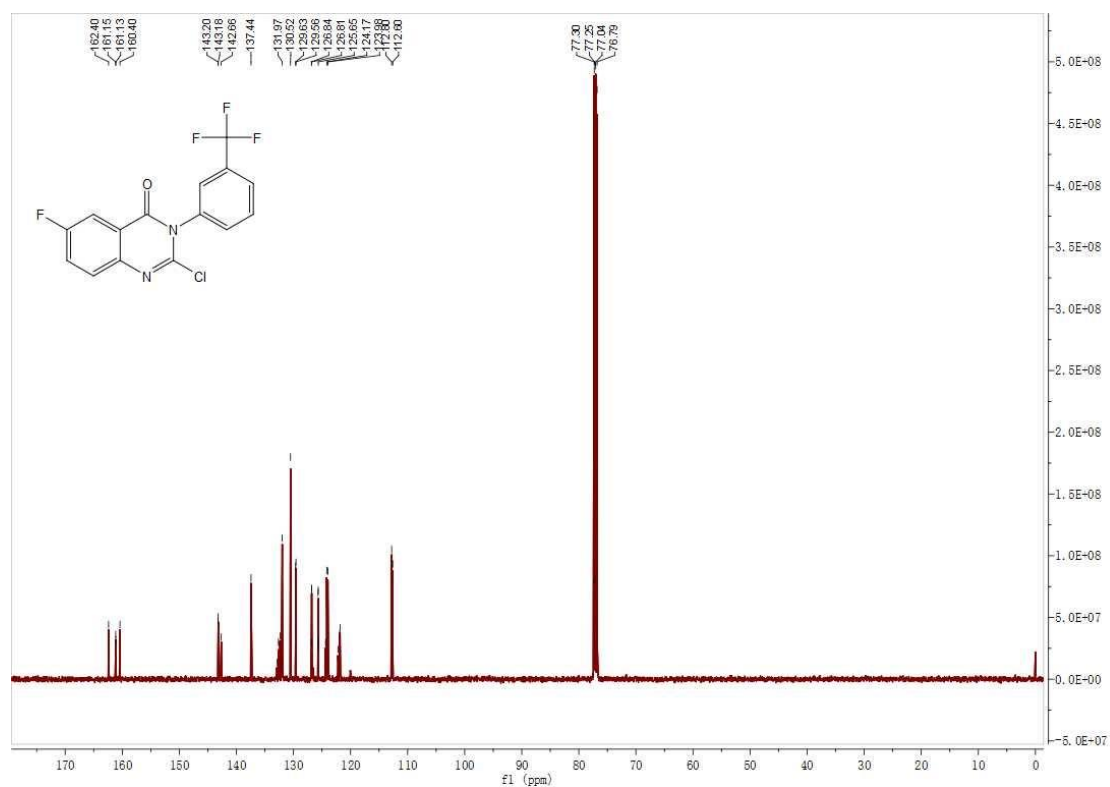

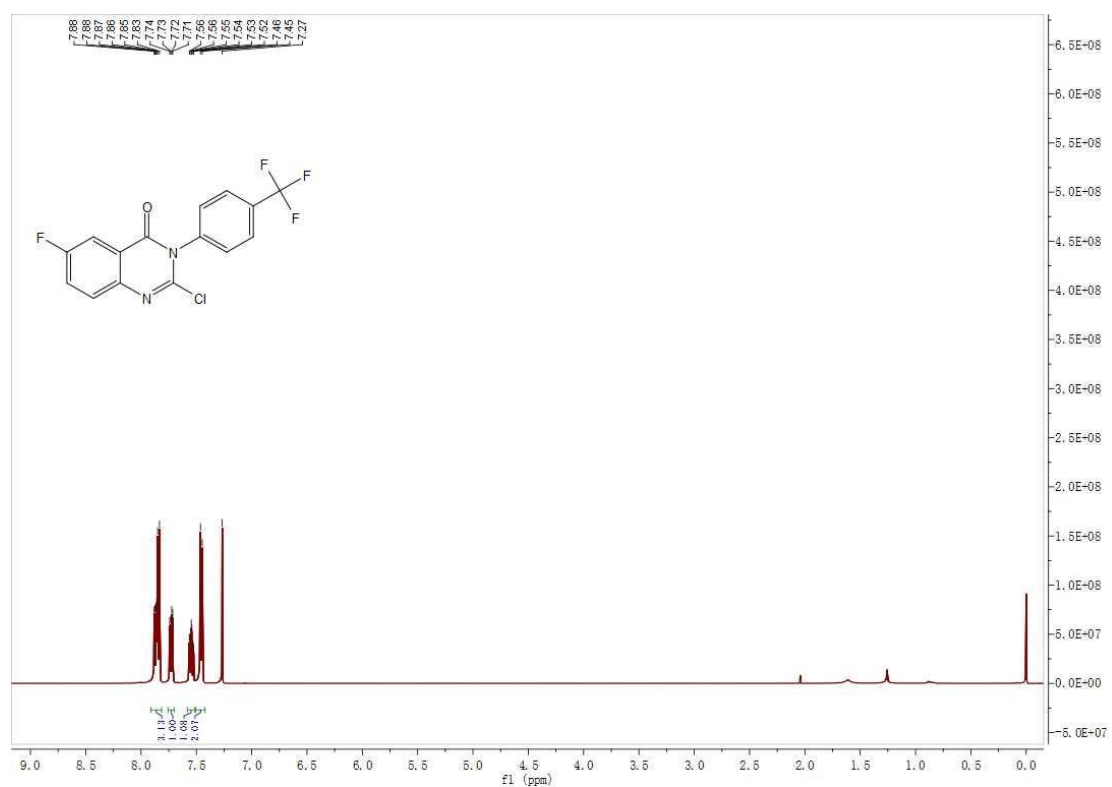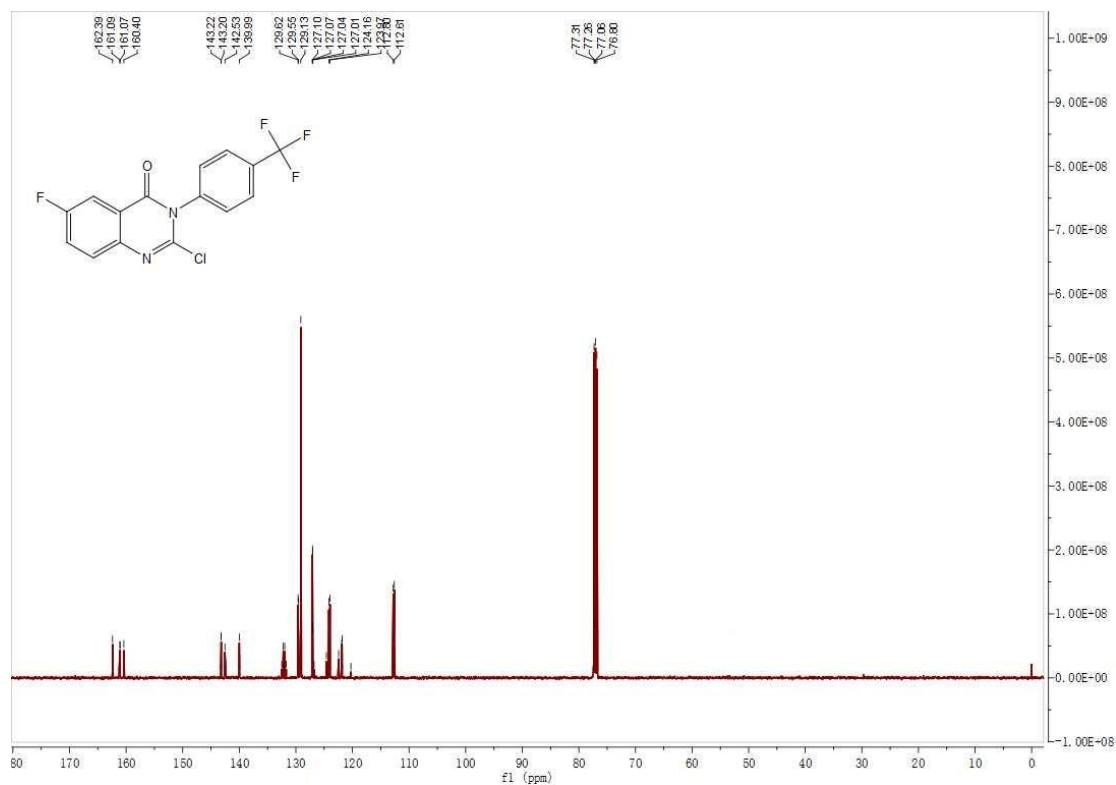

**The <sup>1</sup>H NMR, <sup>13</sup>C NMR and HRMS Spectrum of Target Compounds QPP-1 to QPP-29**

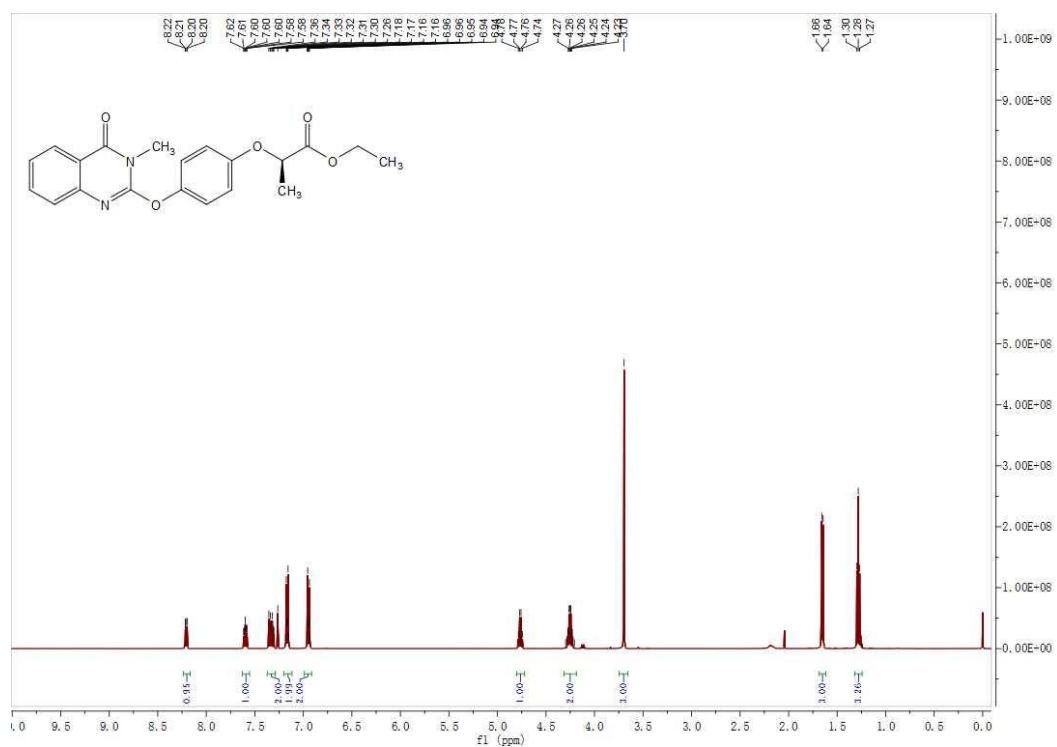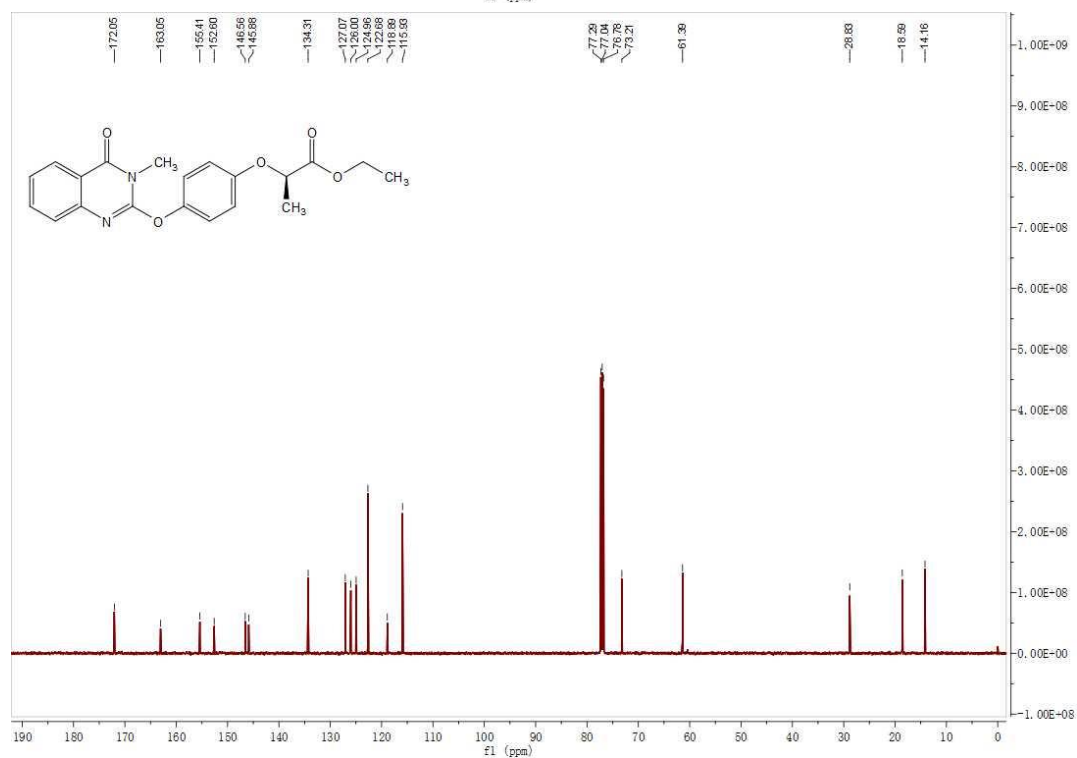

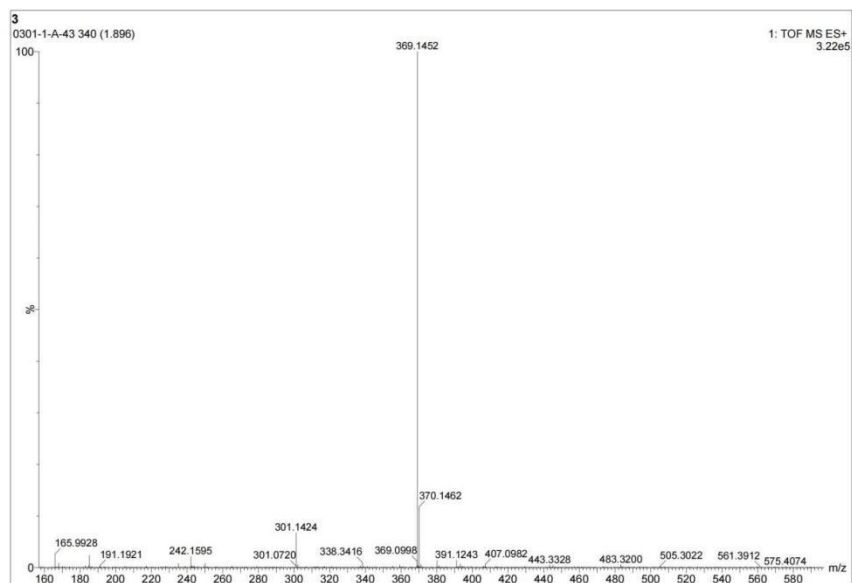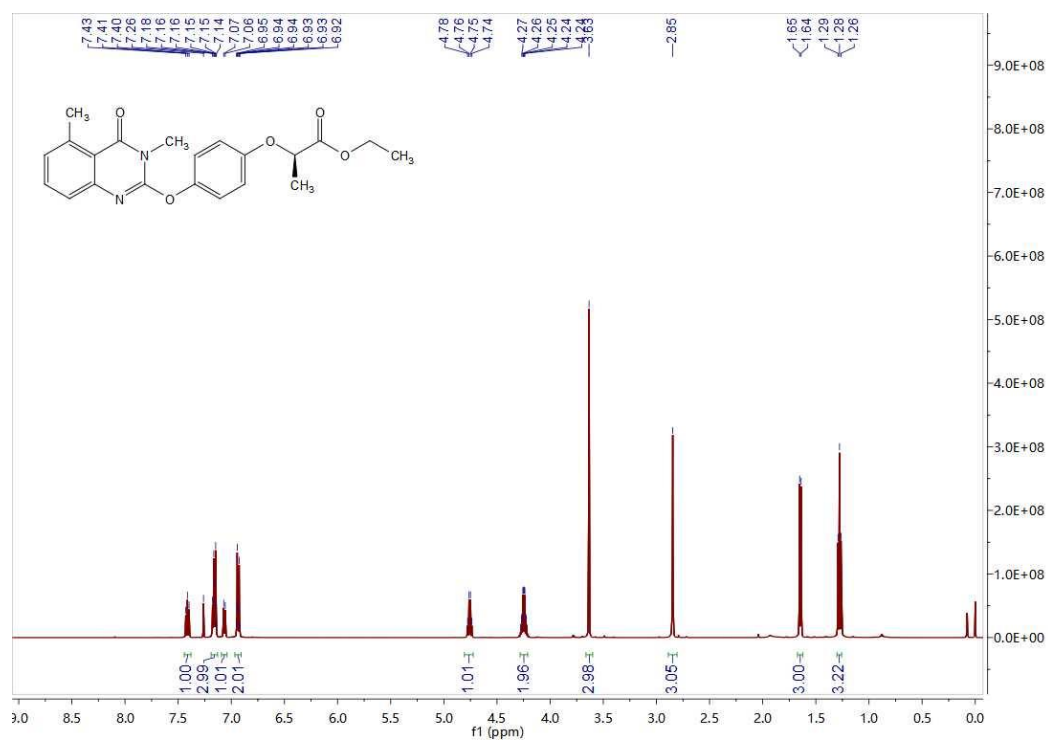

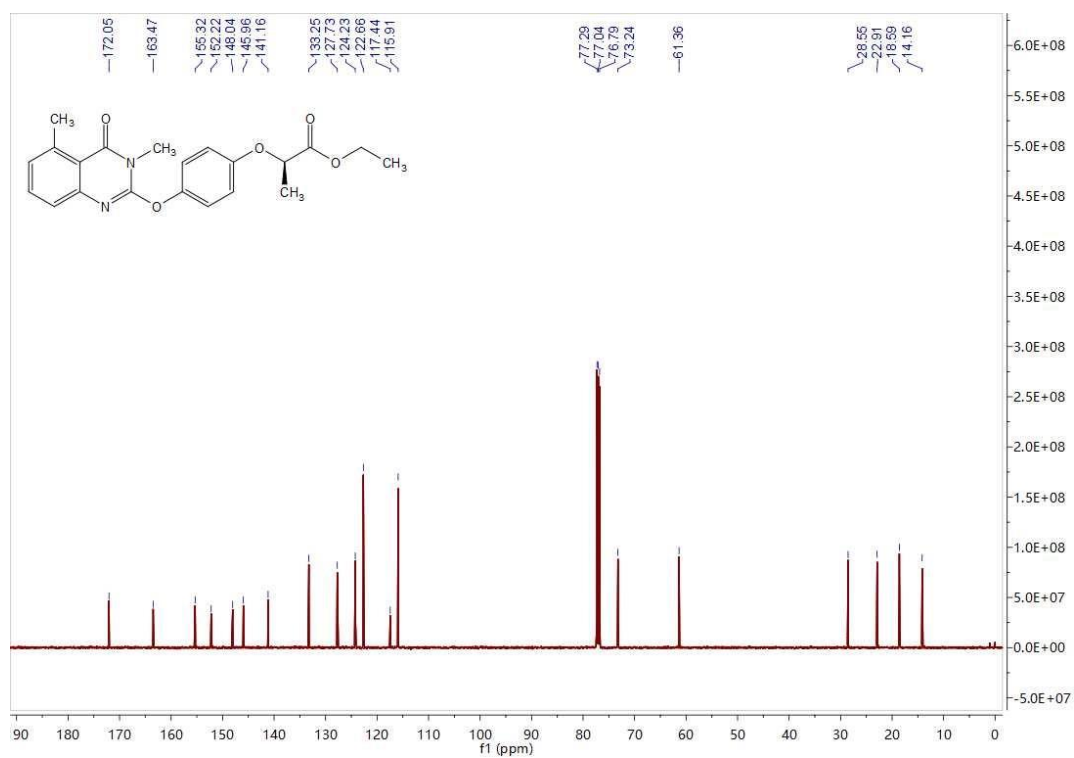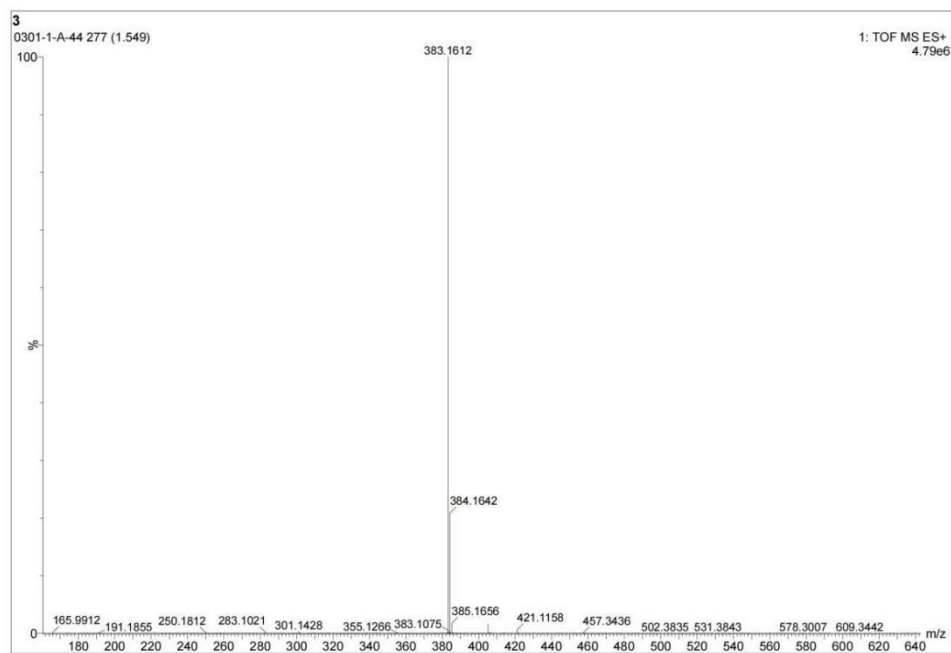

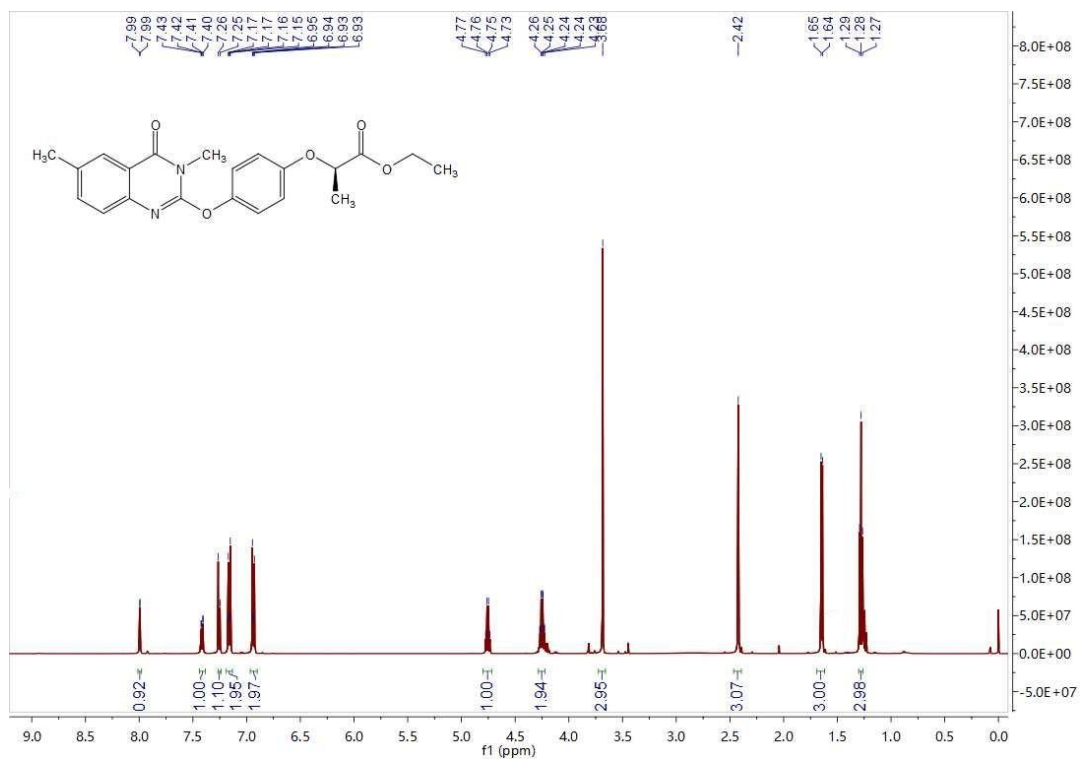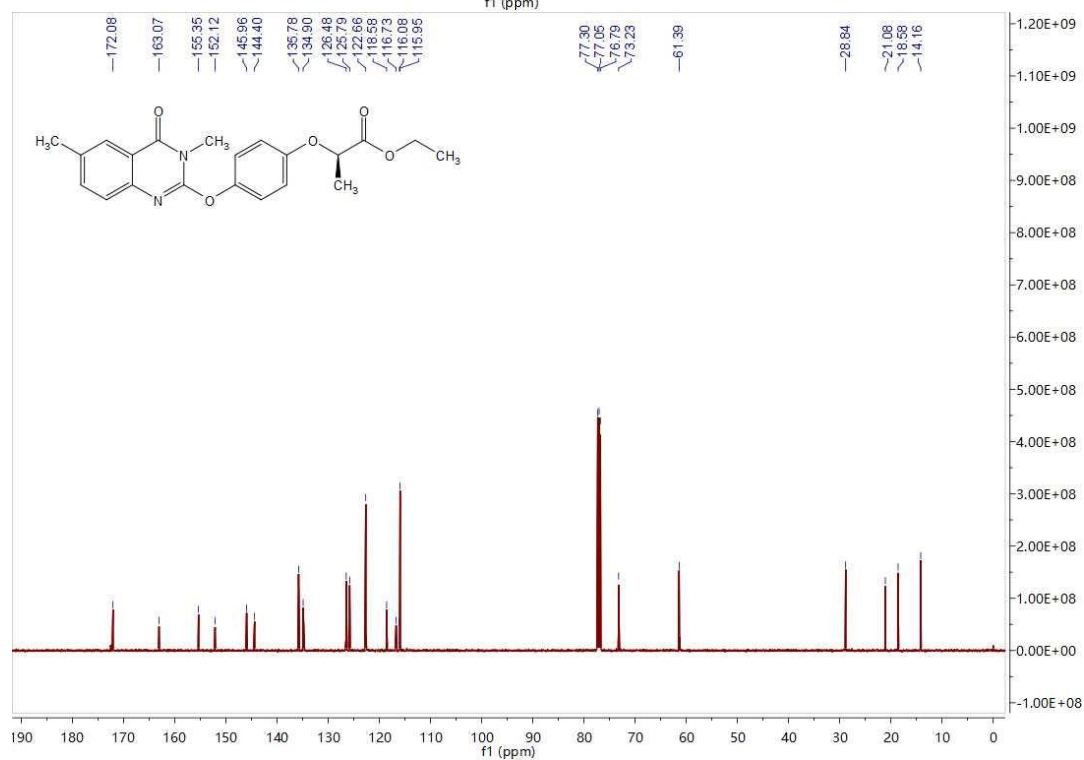



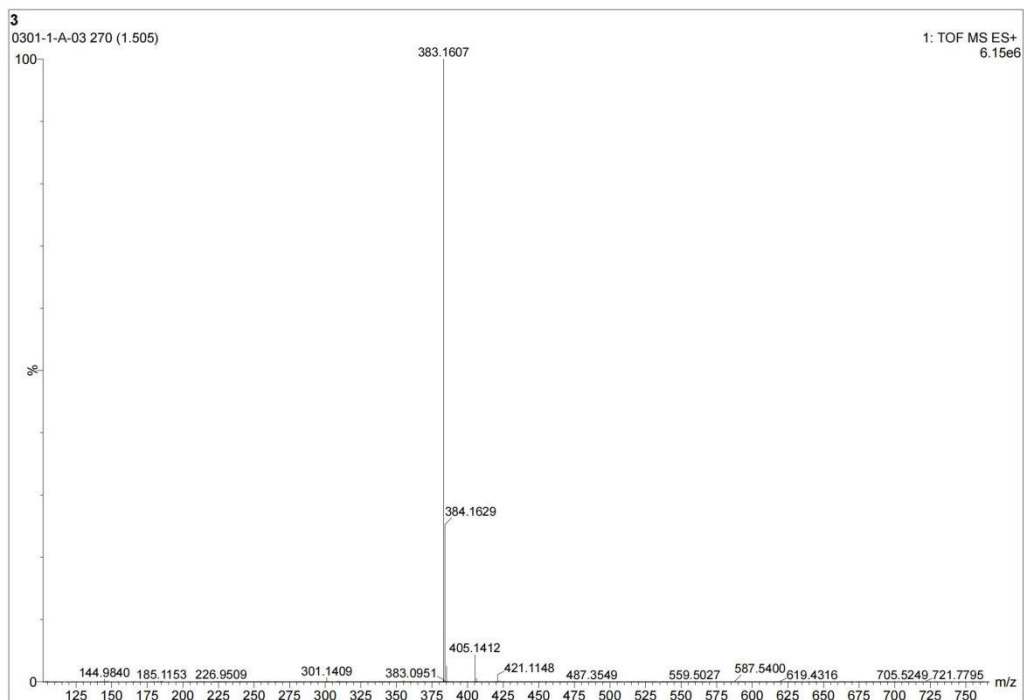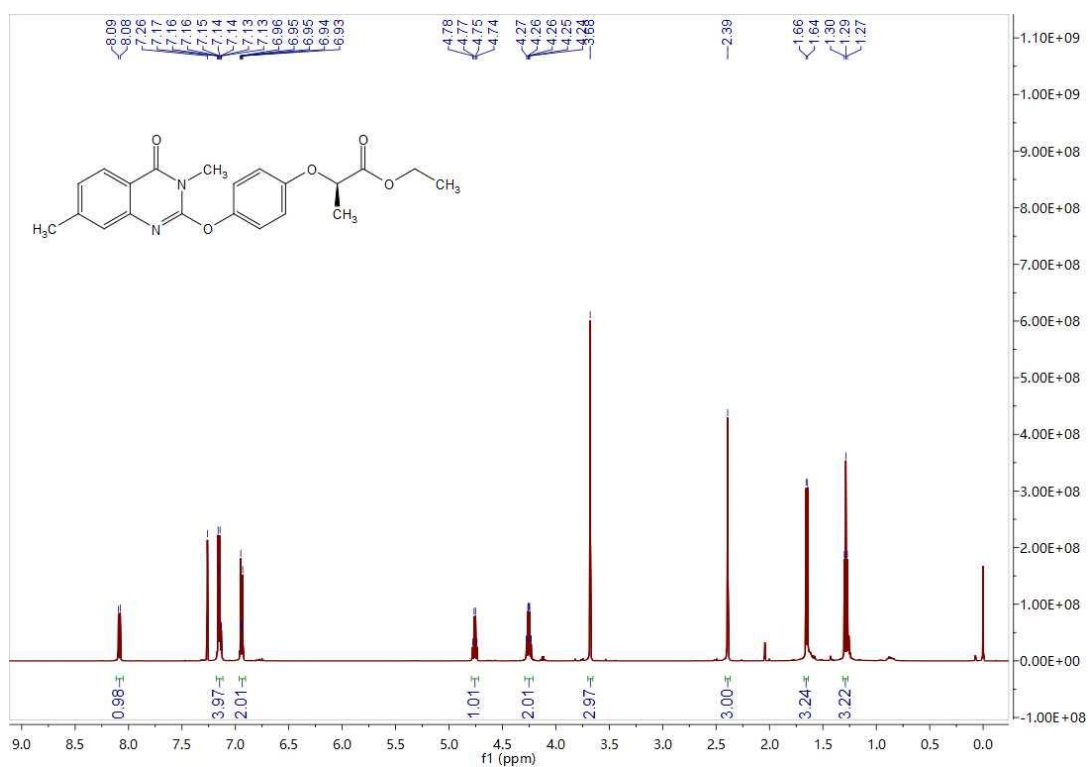

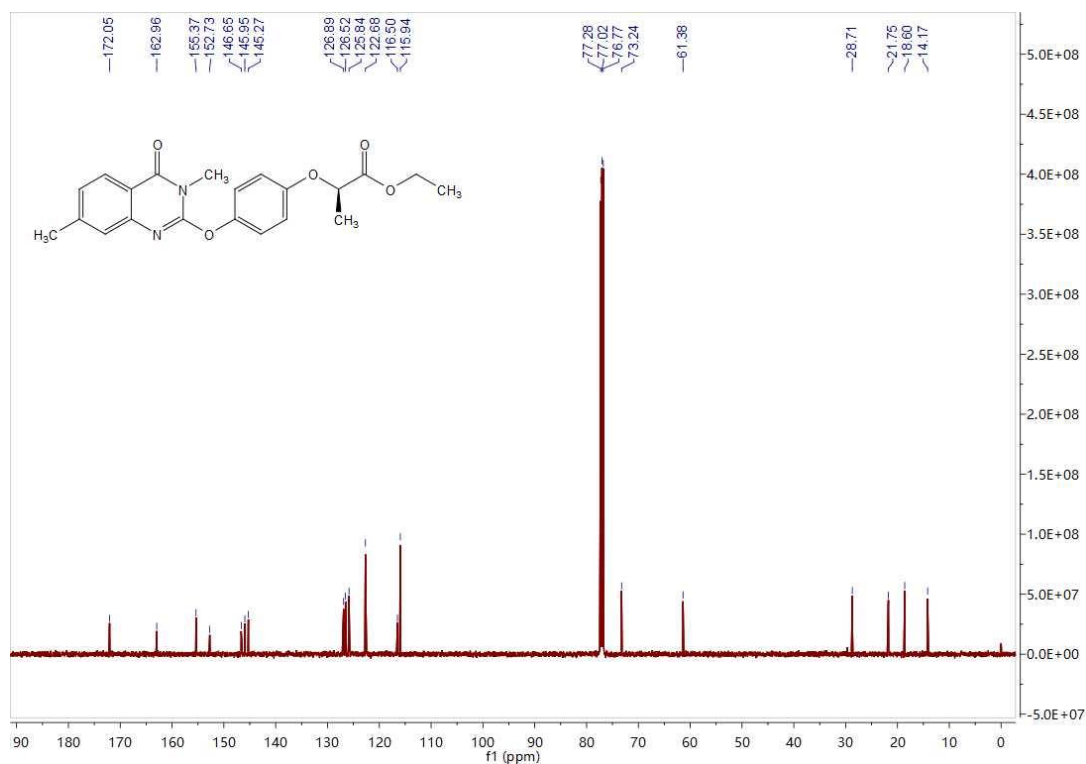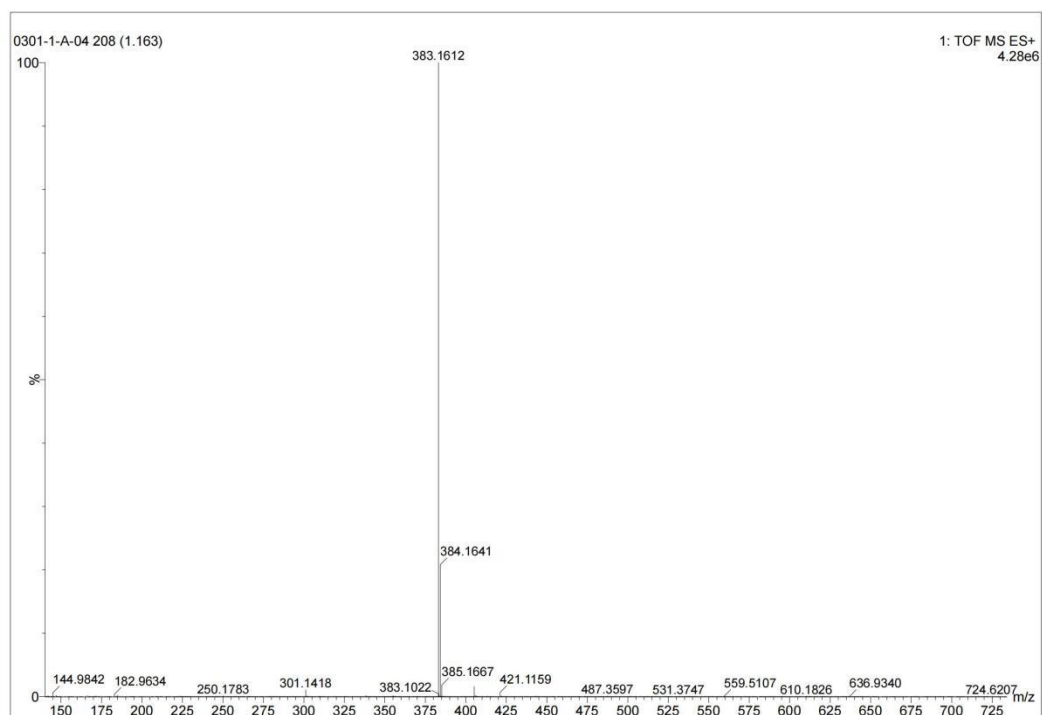

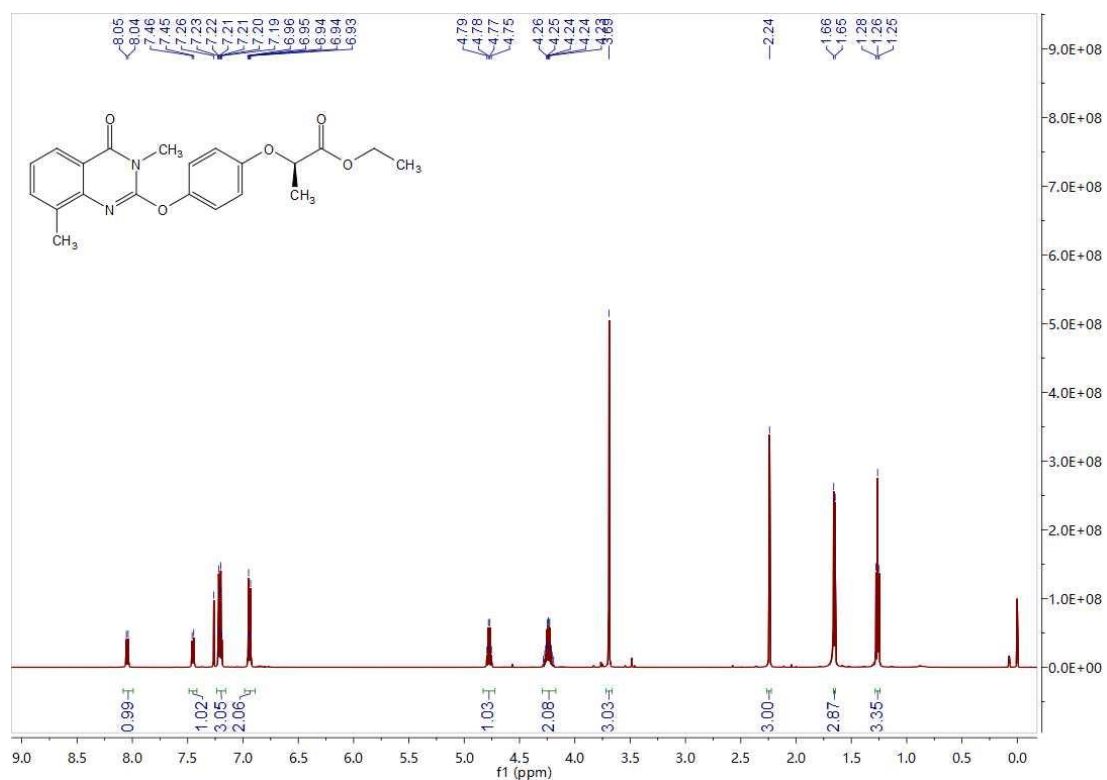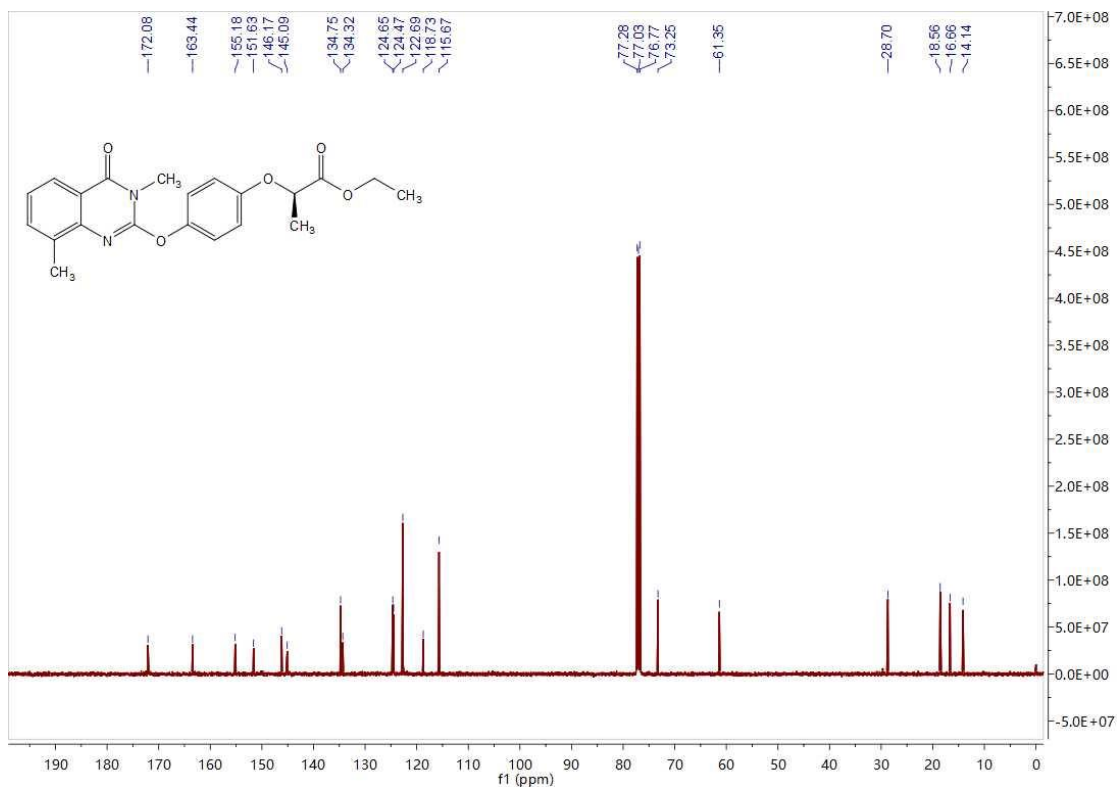

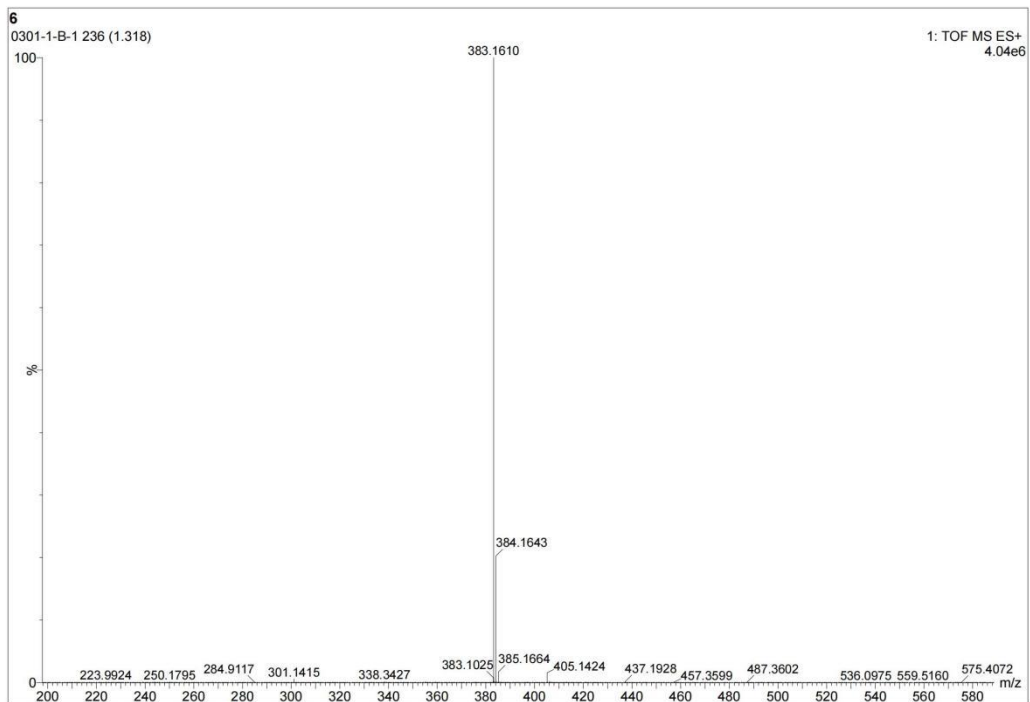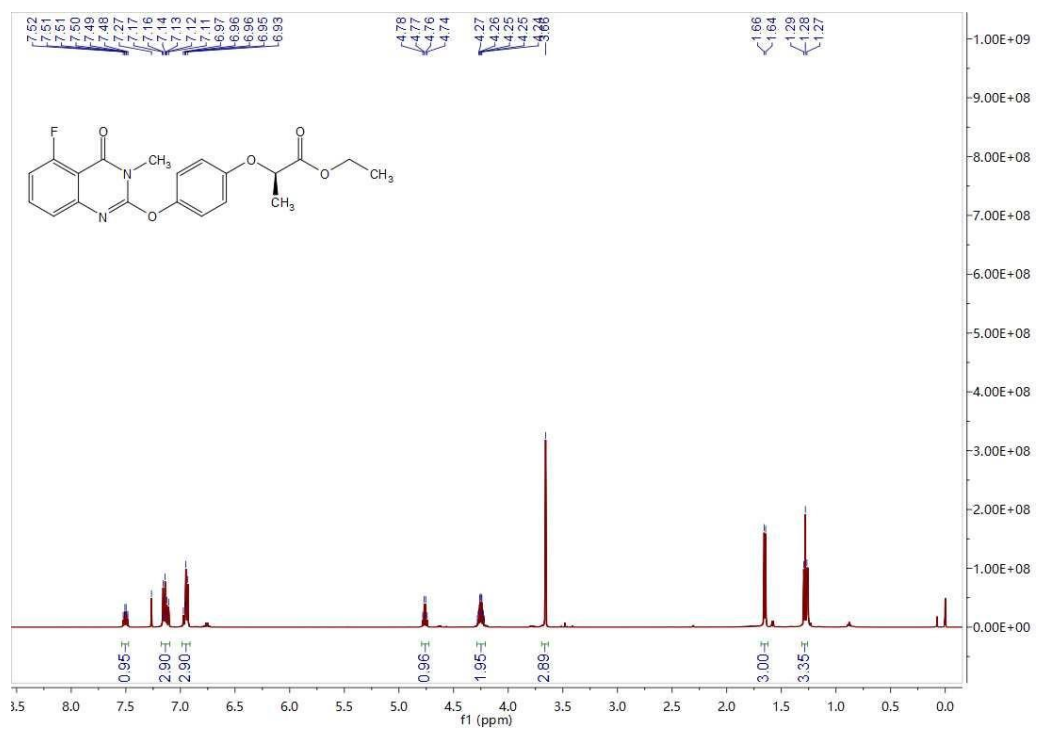

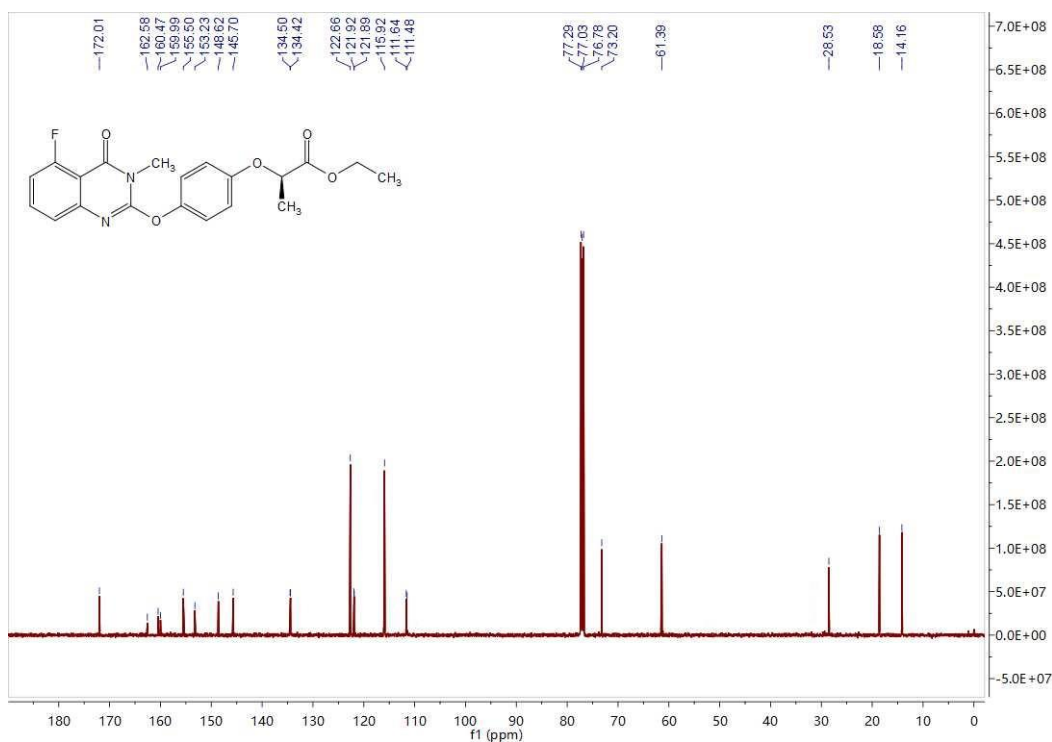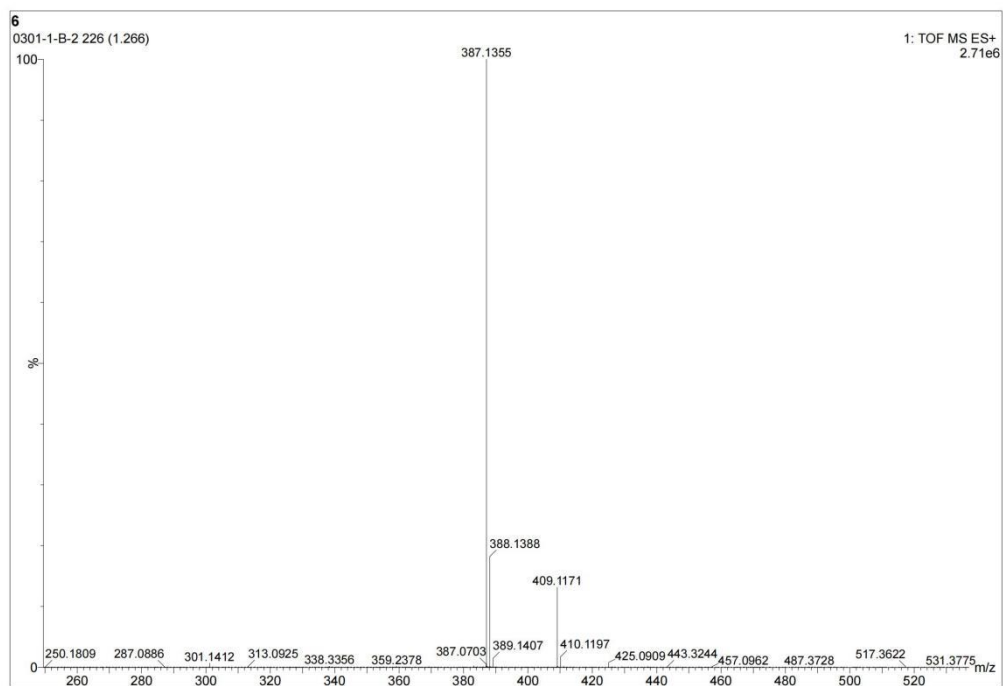

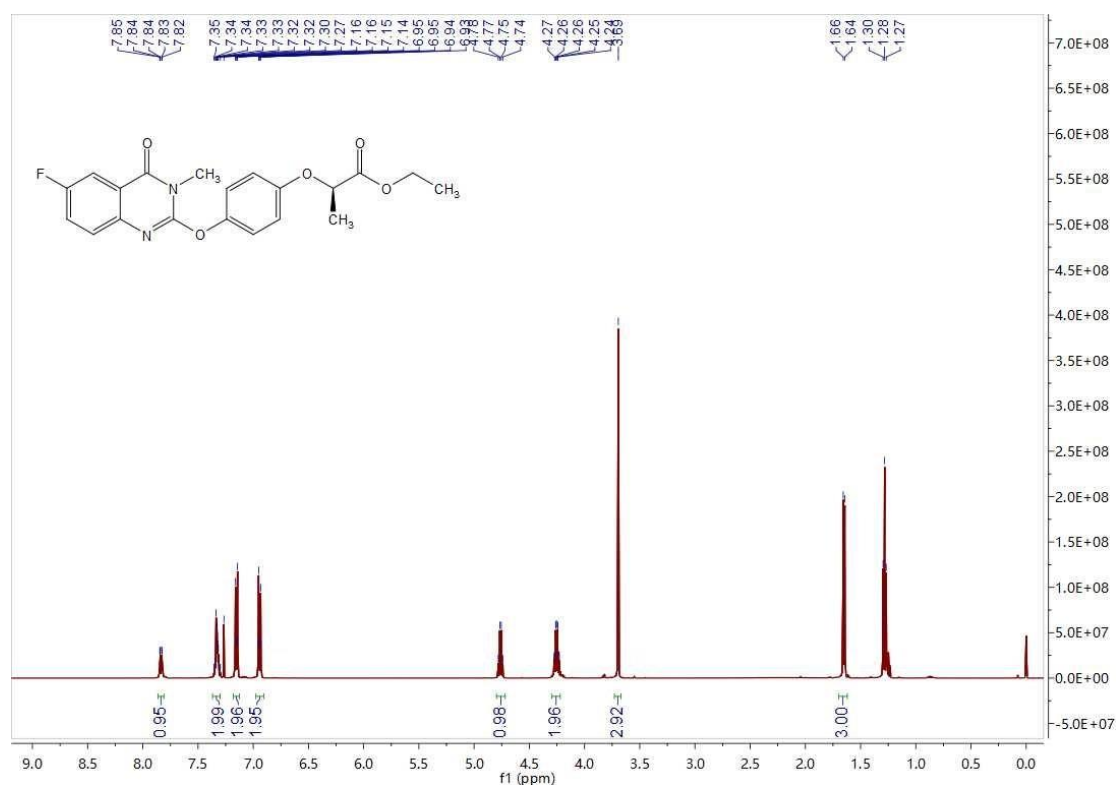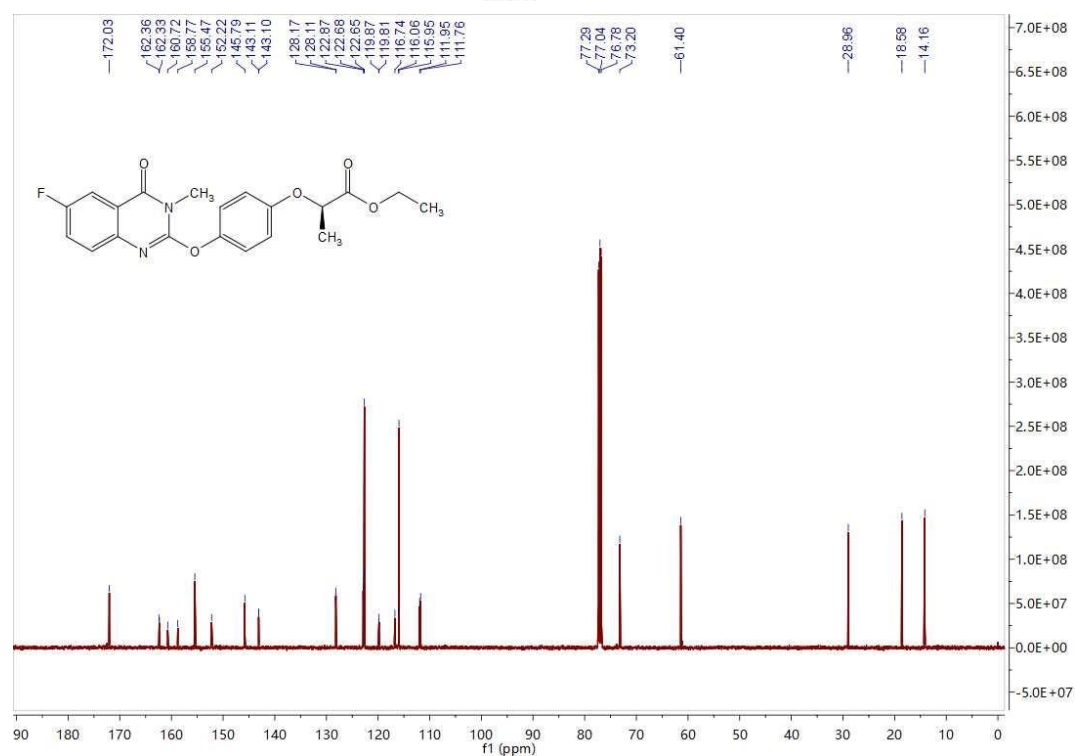

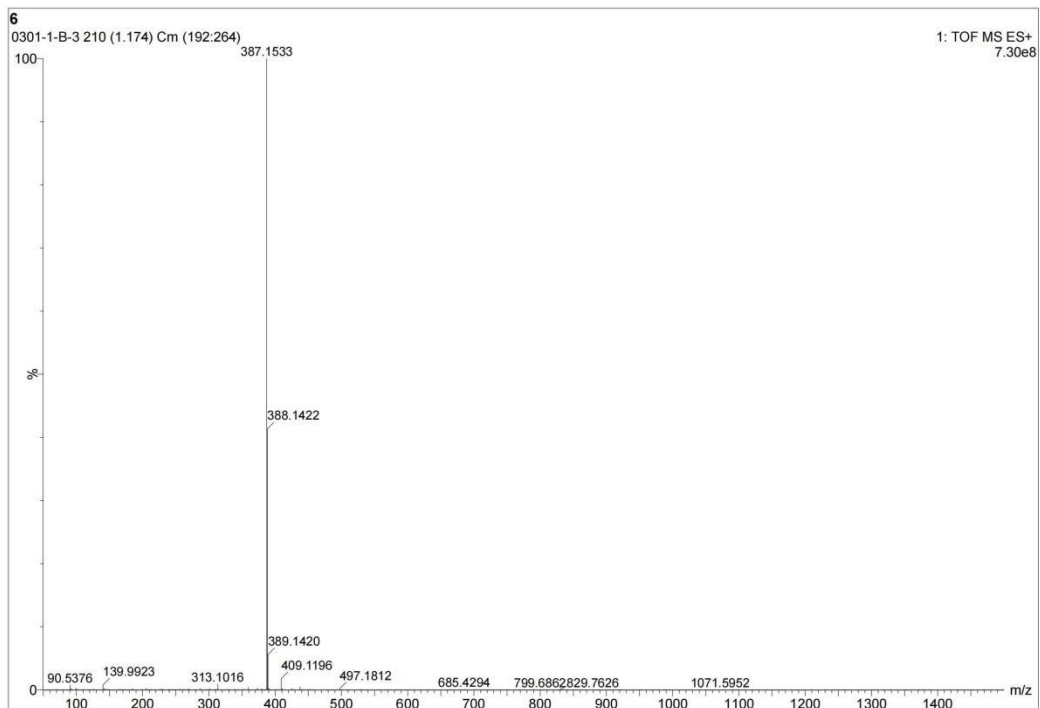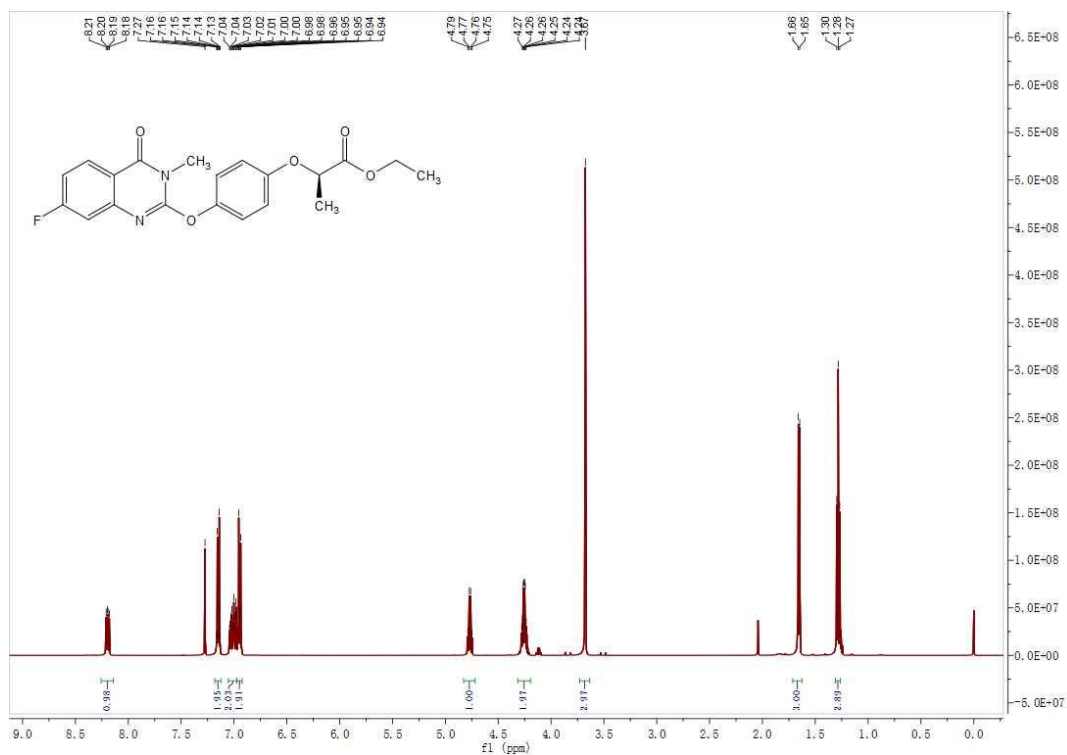

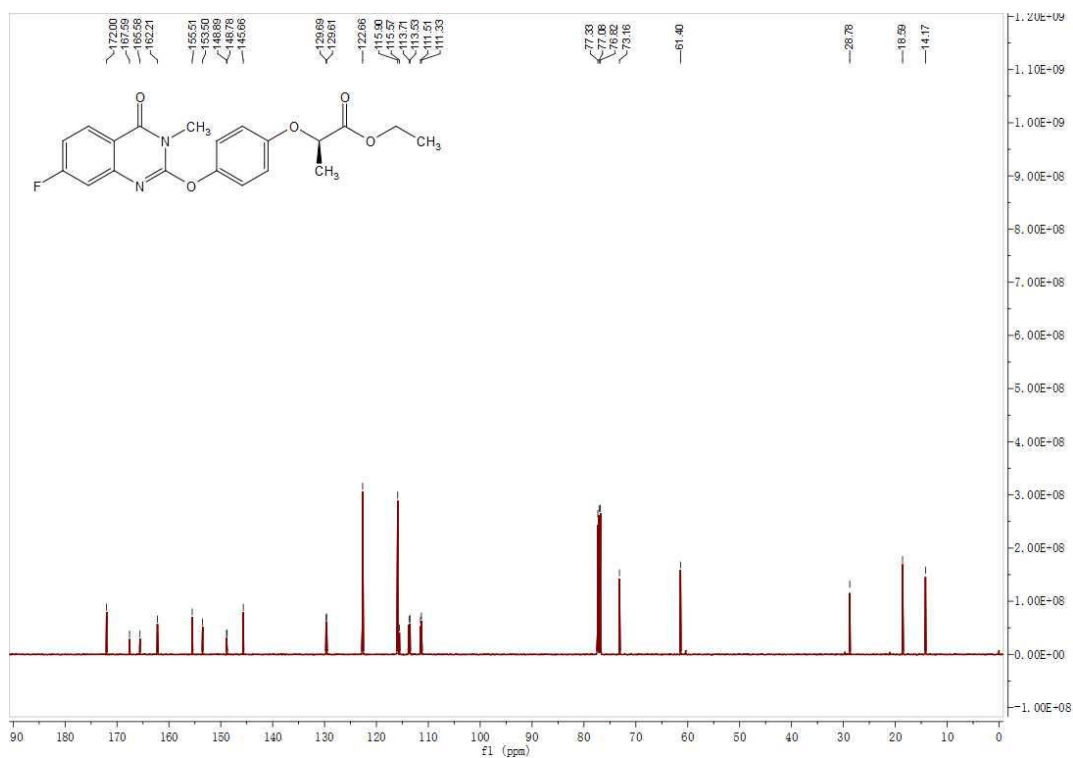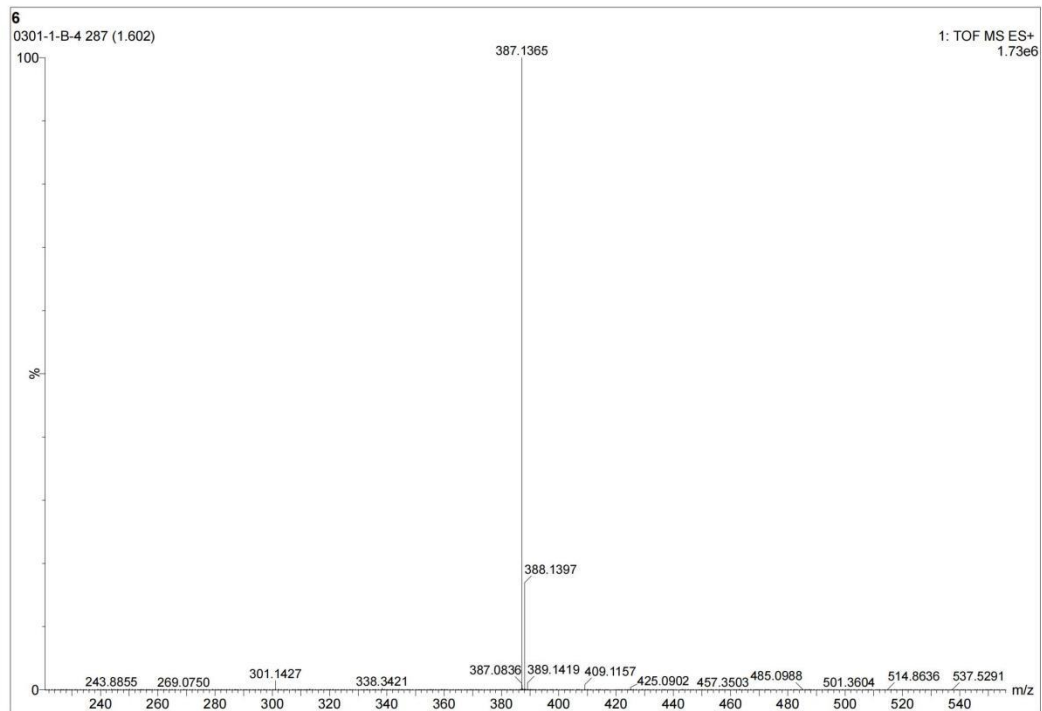



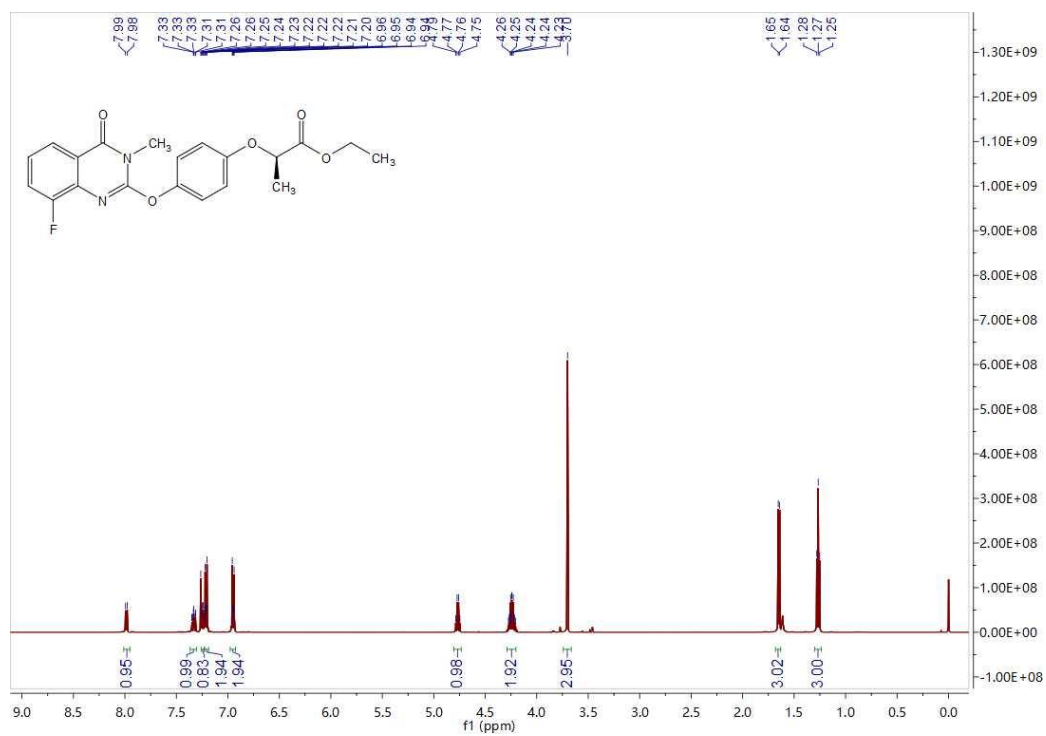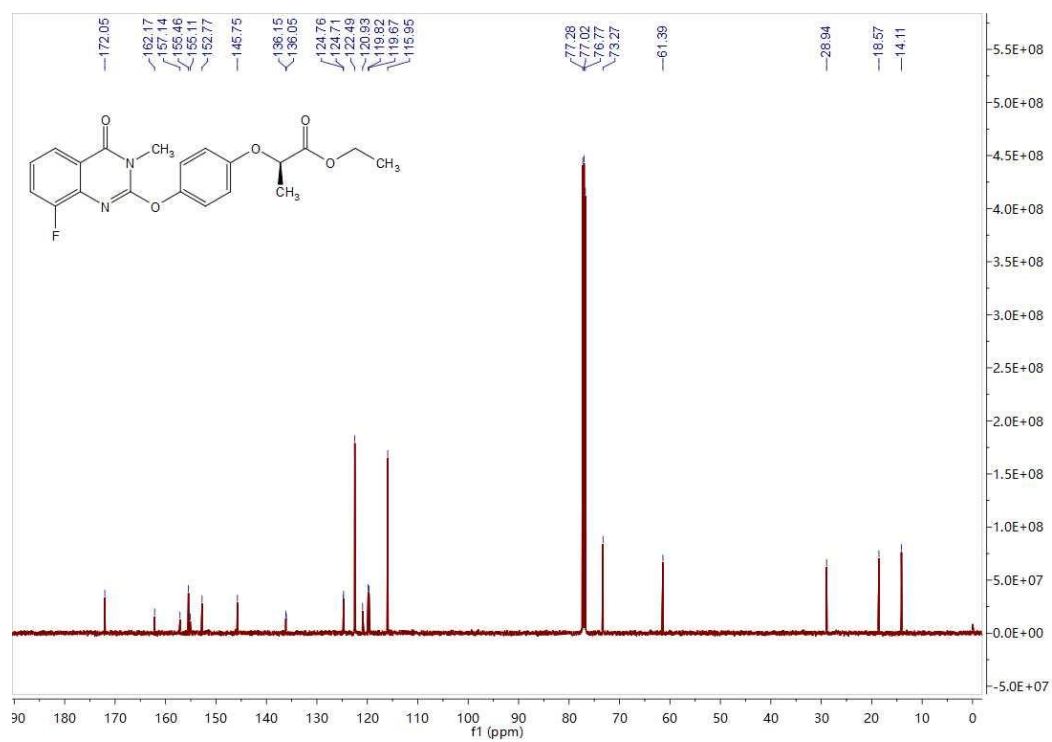

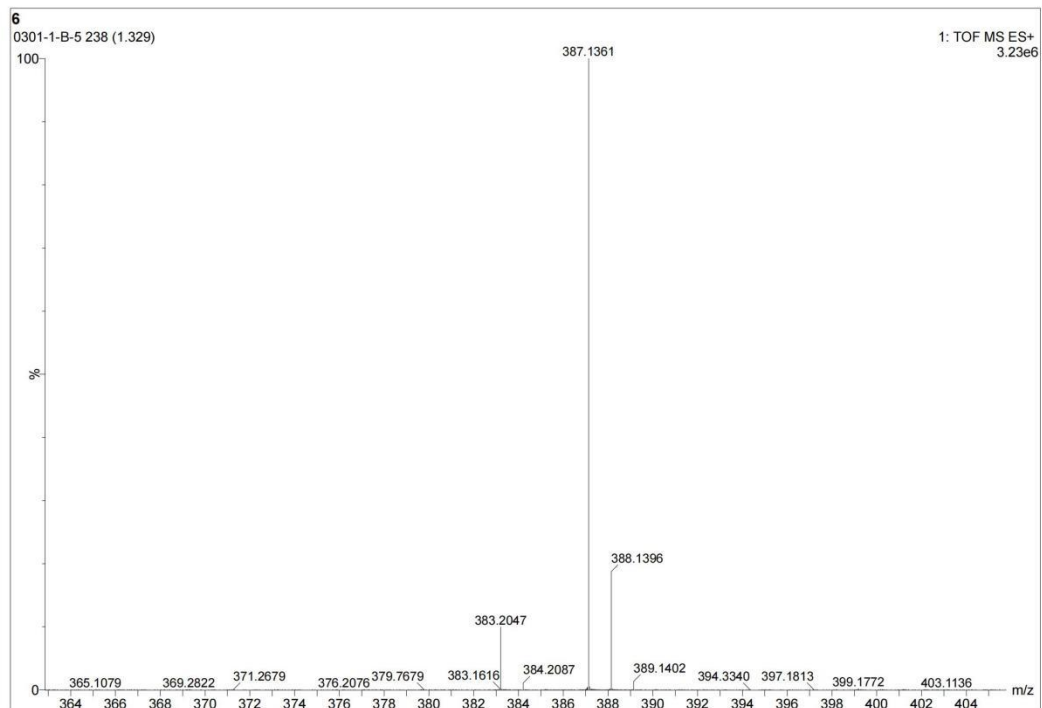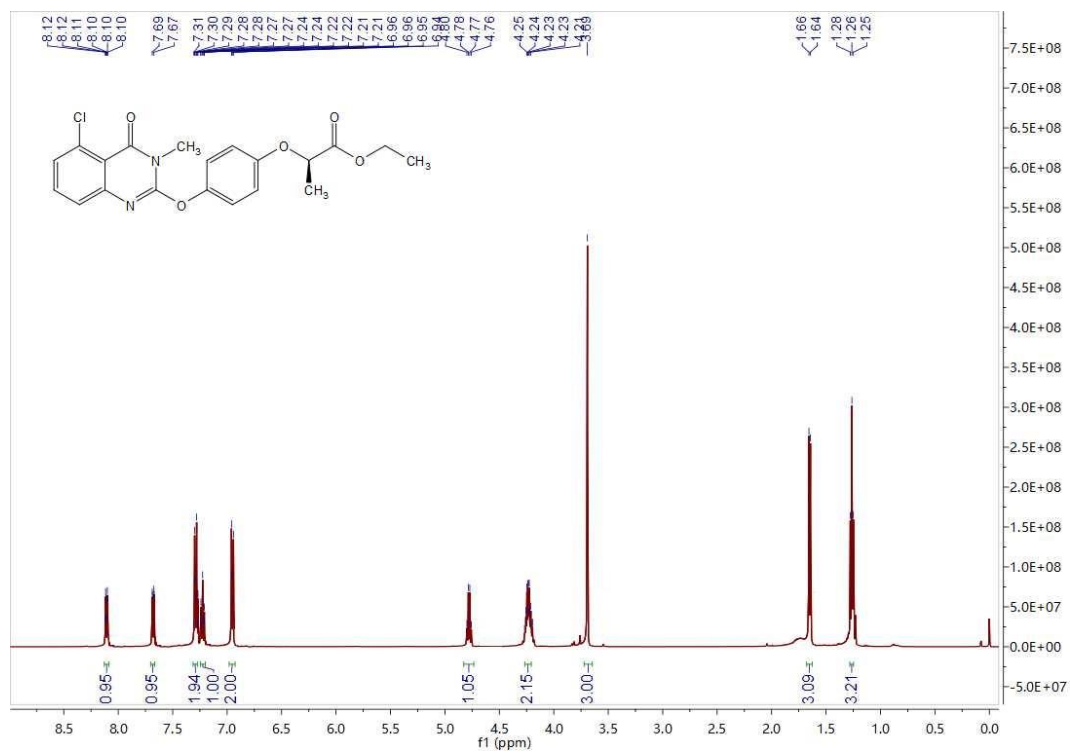

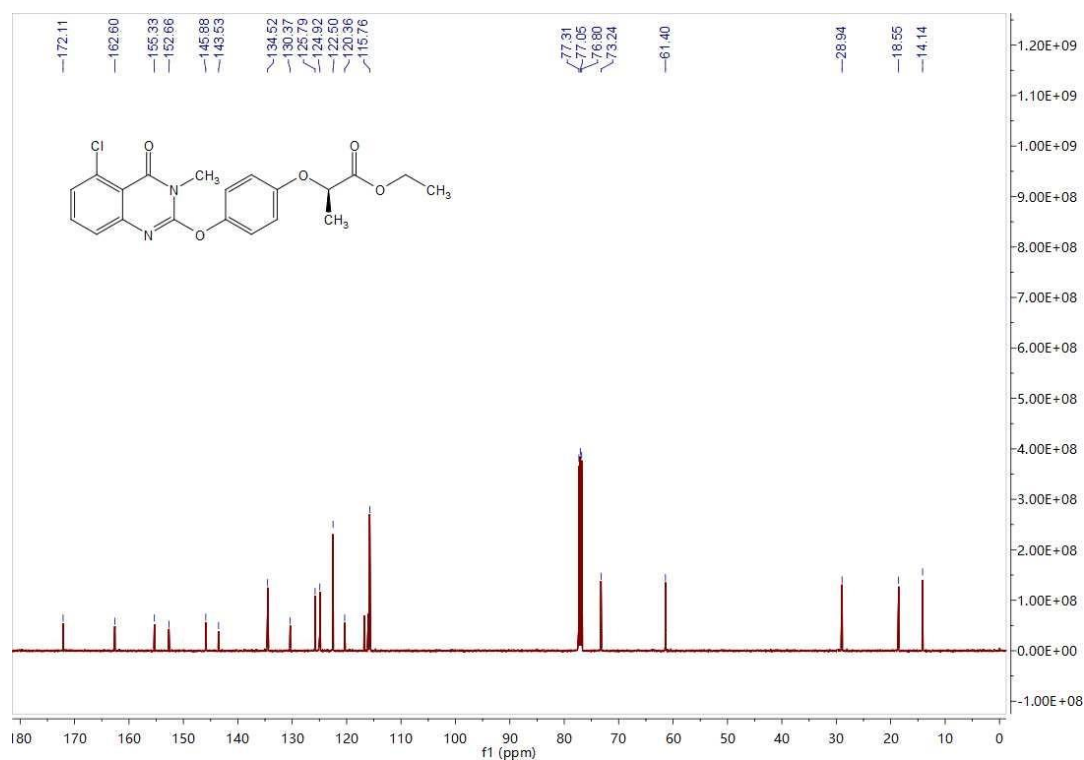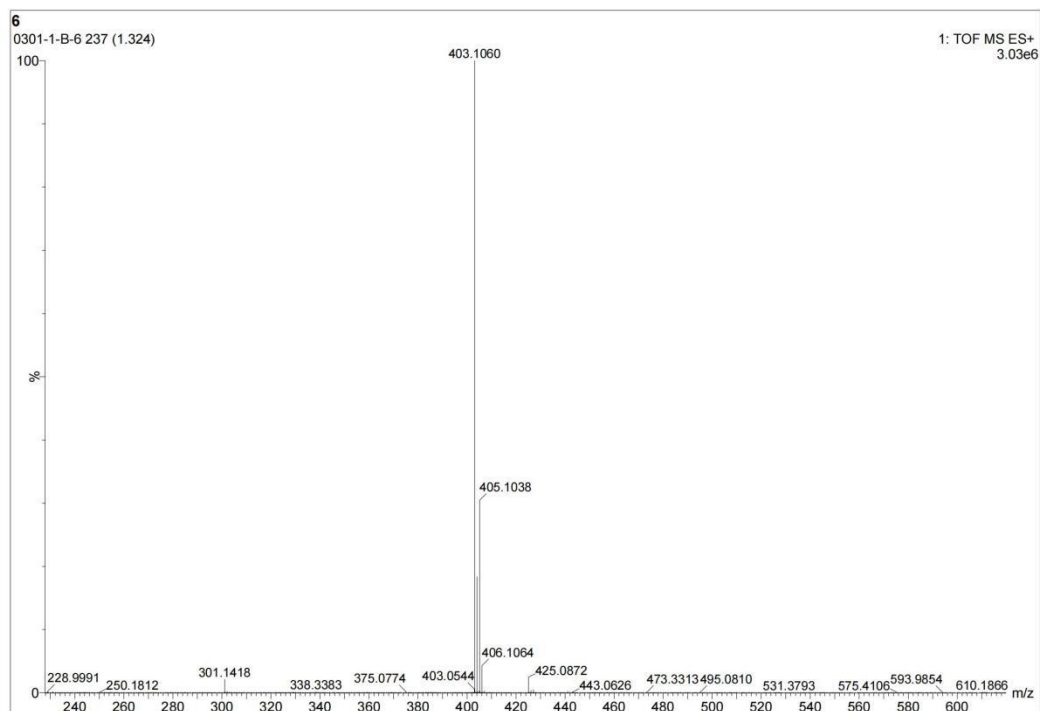

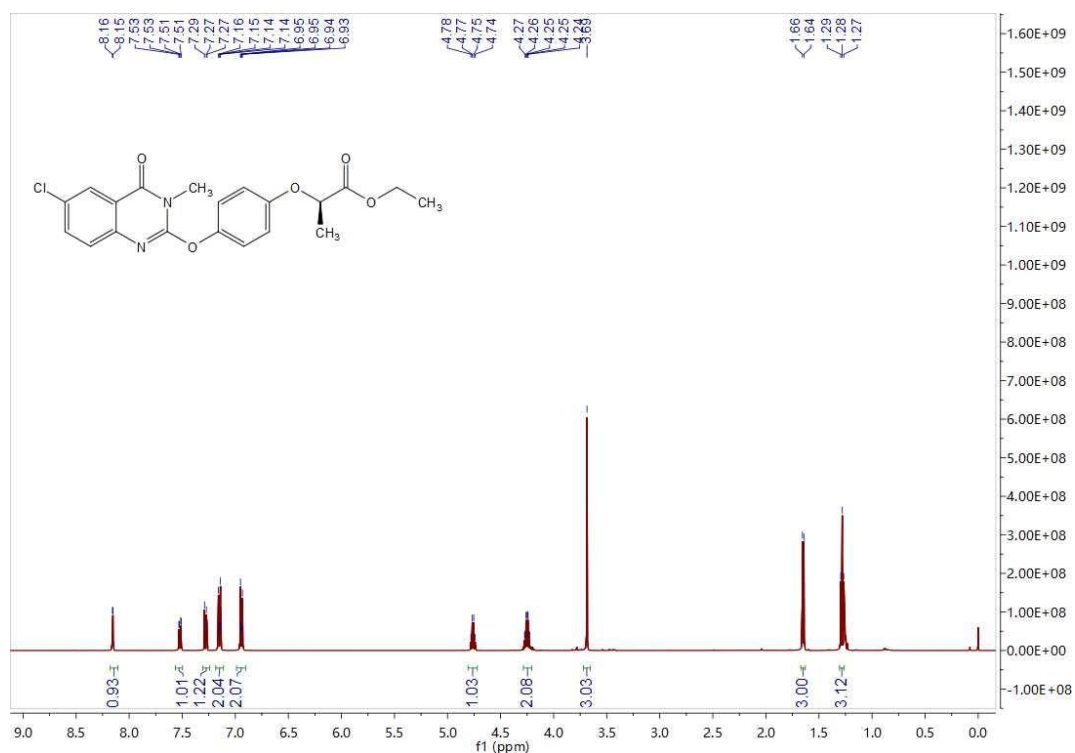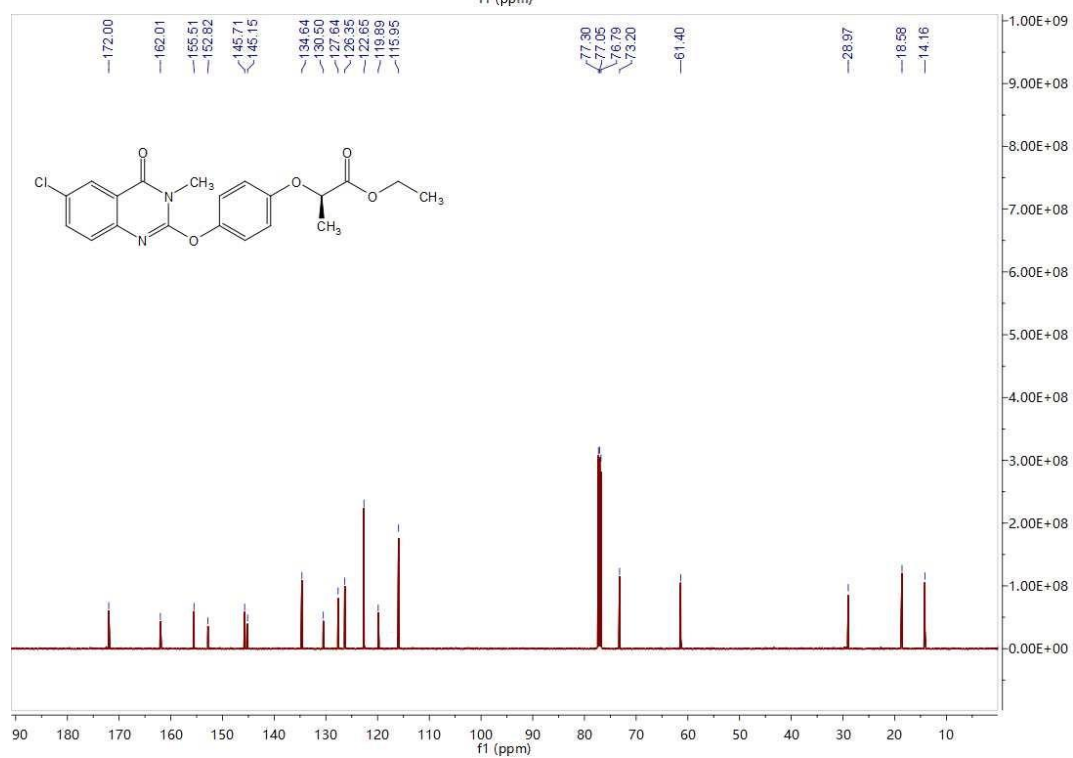

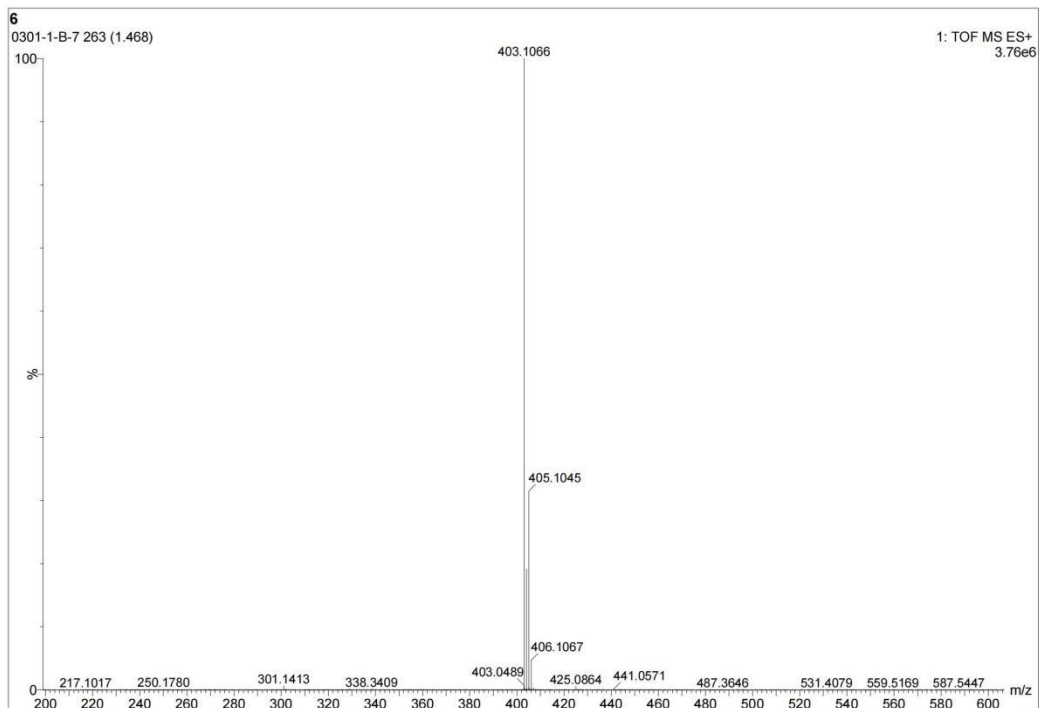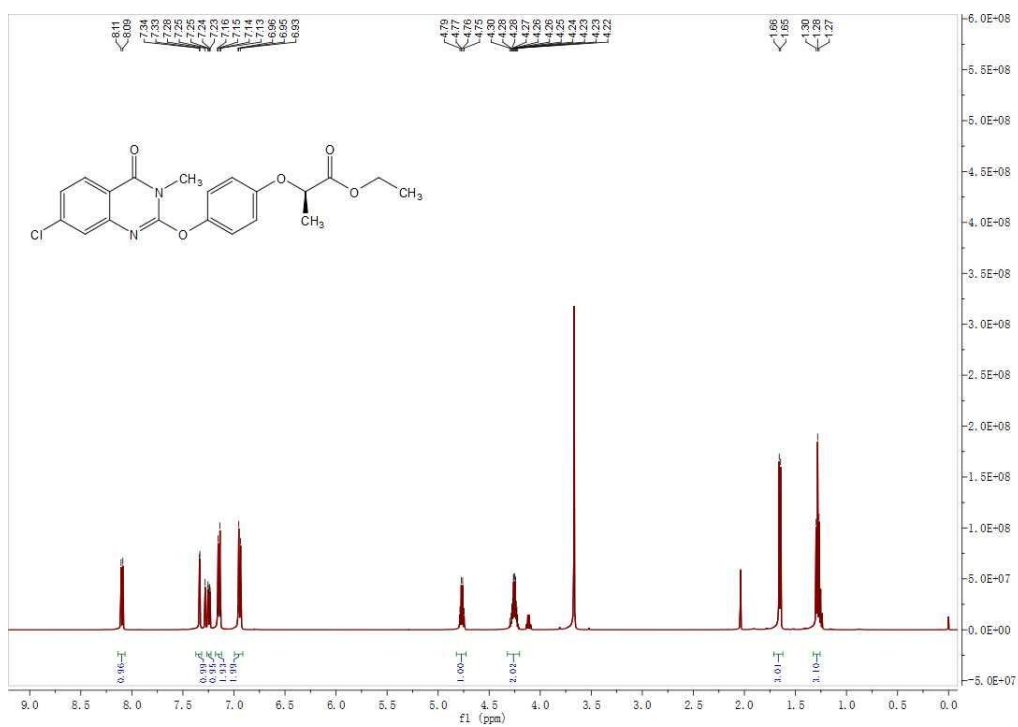

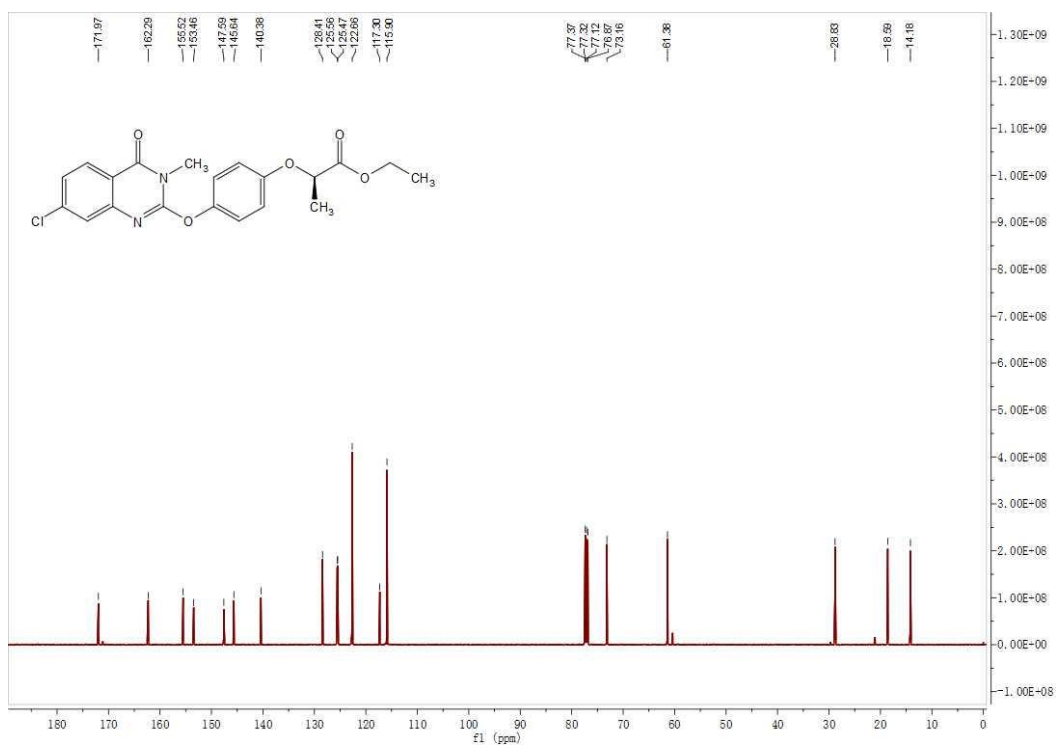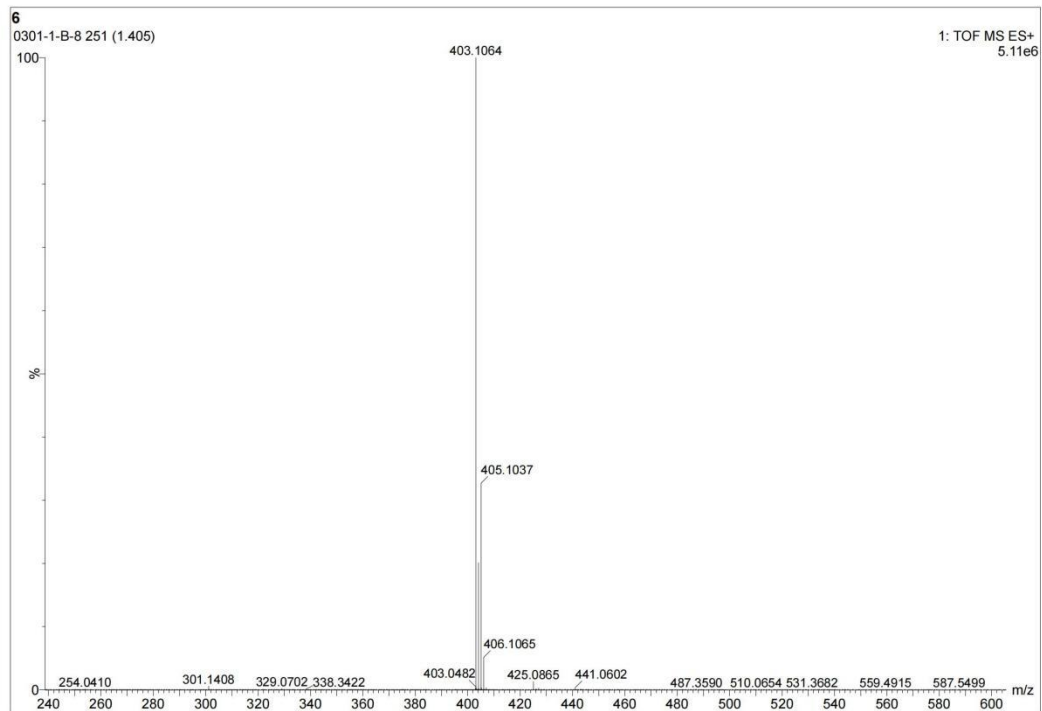

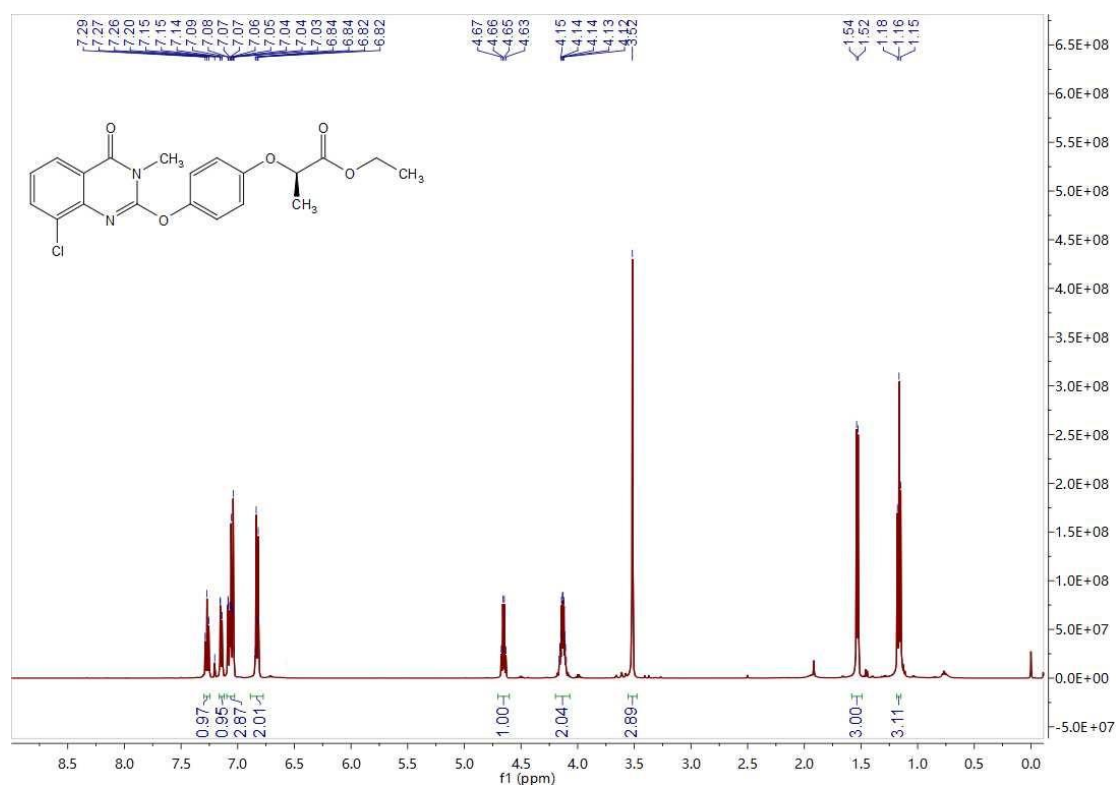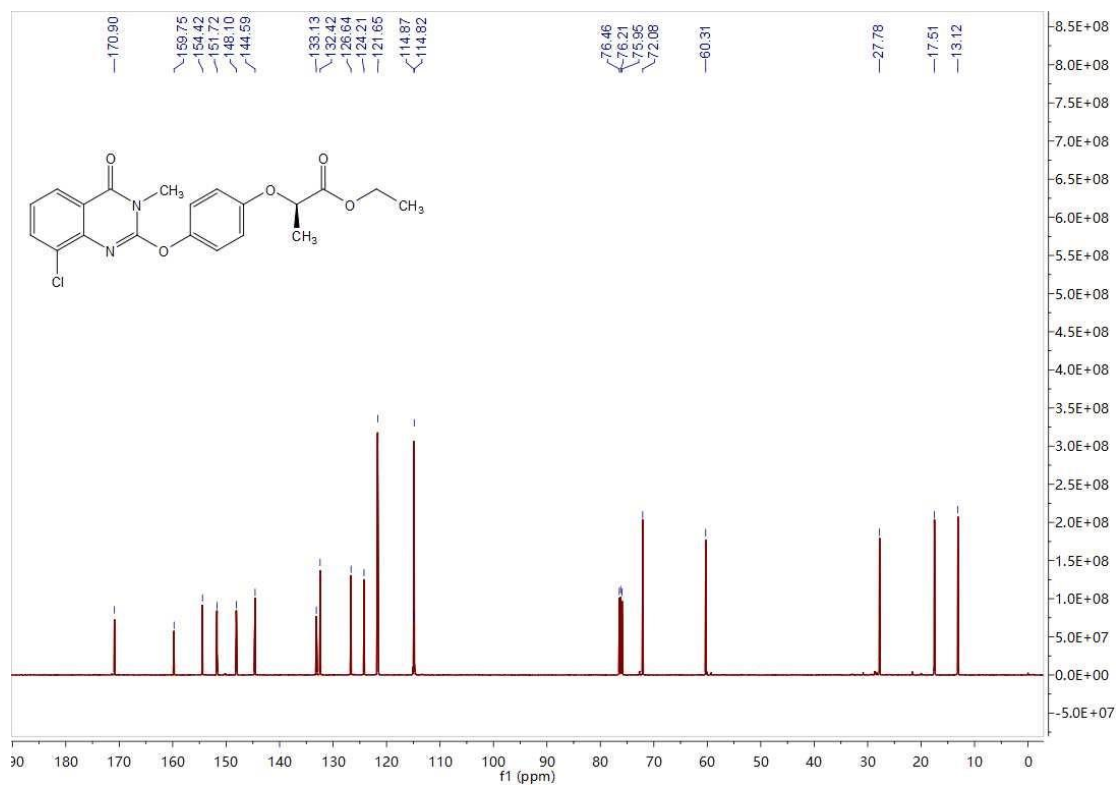

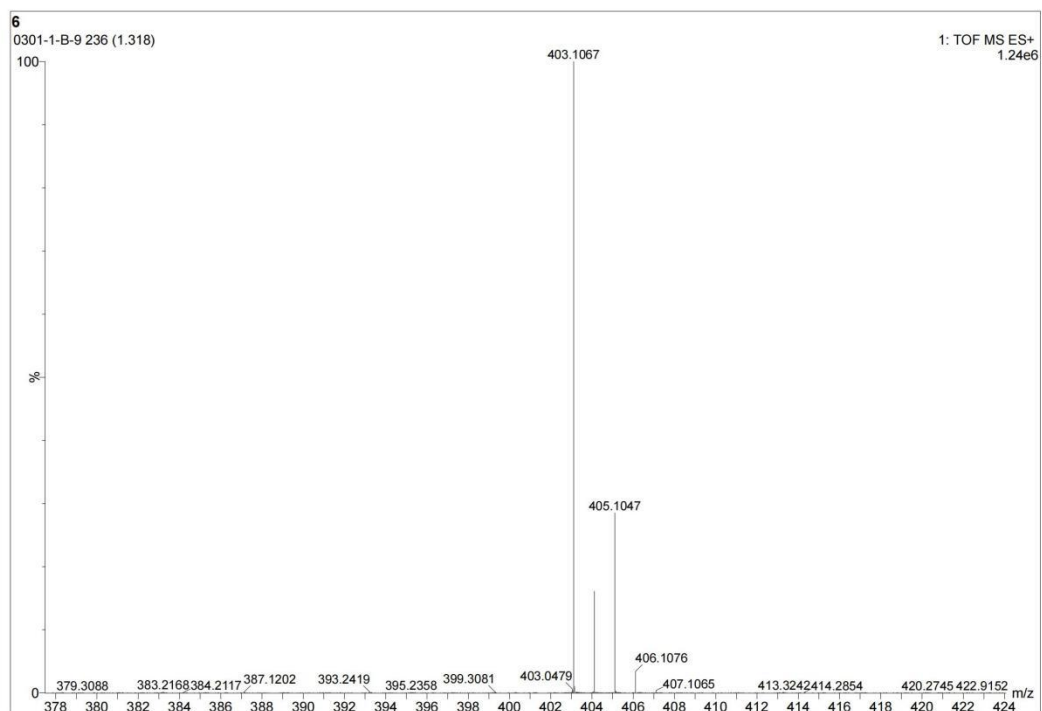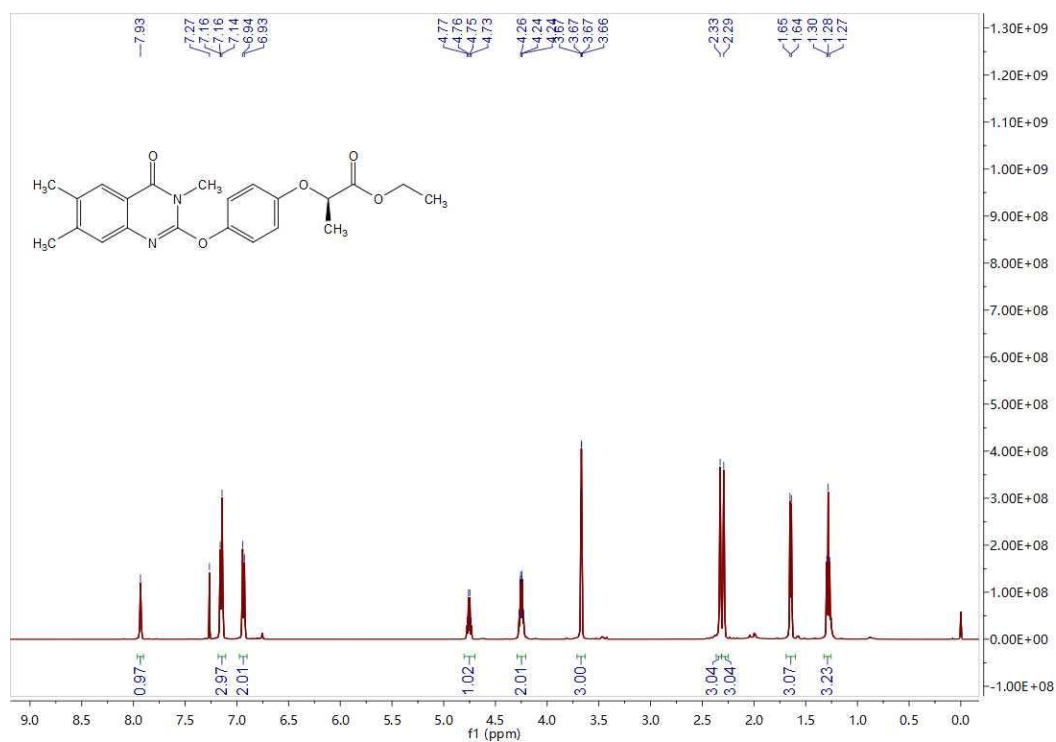



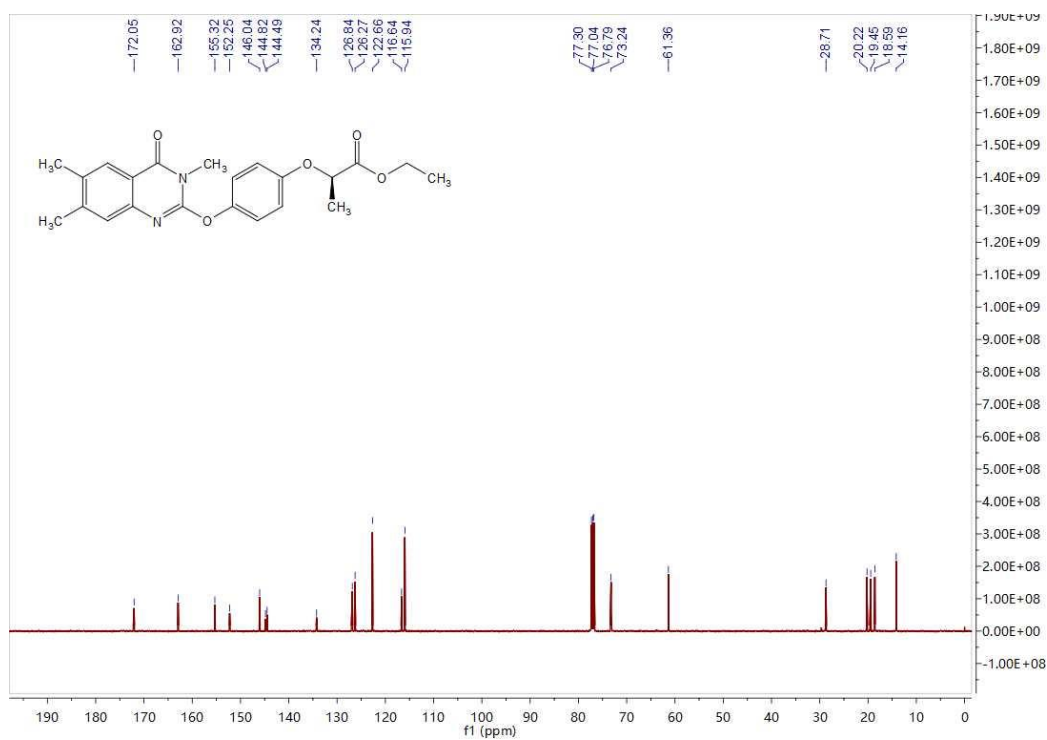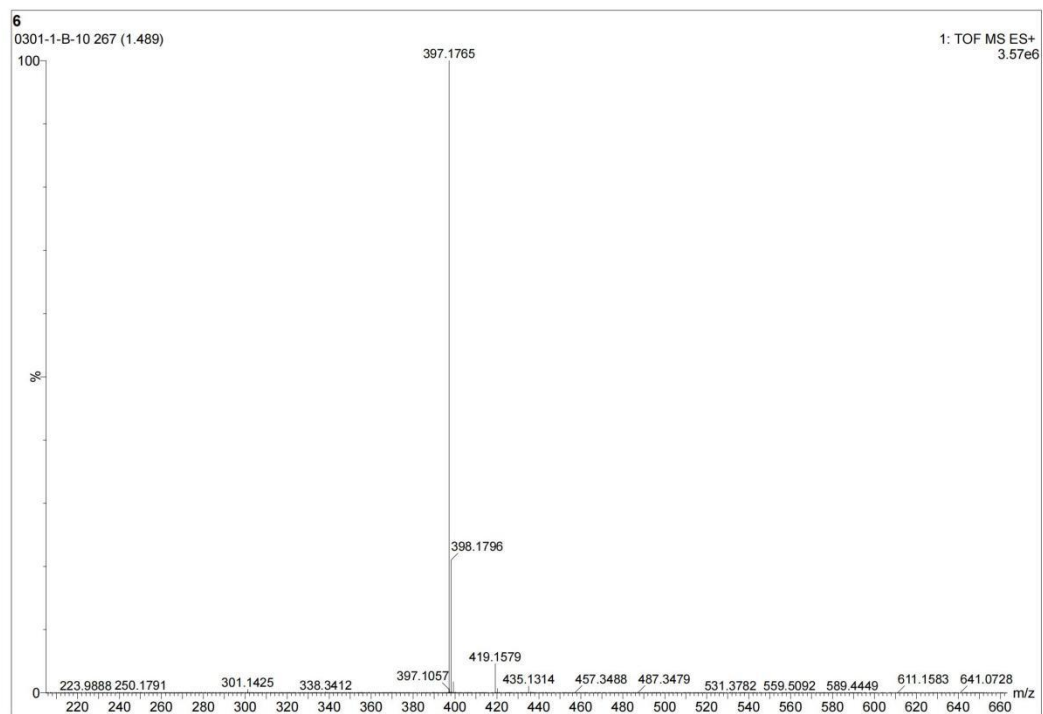

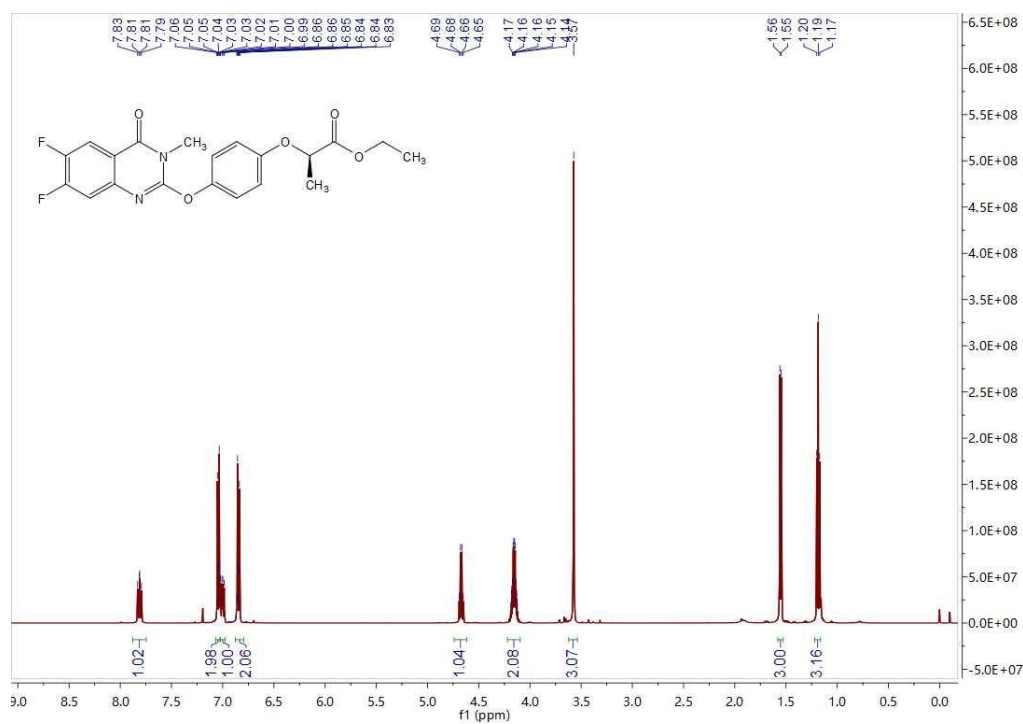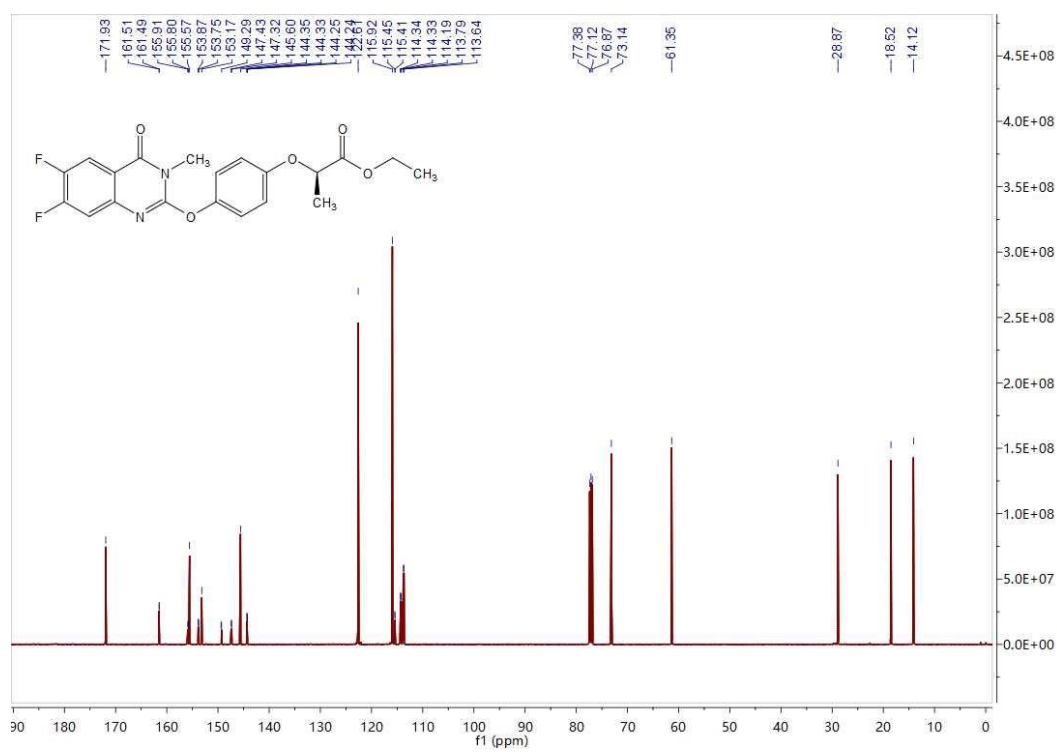

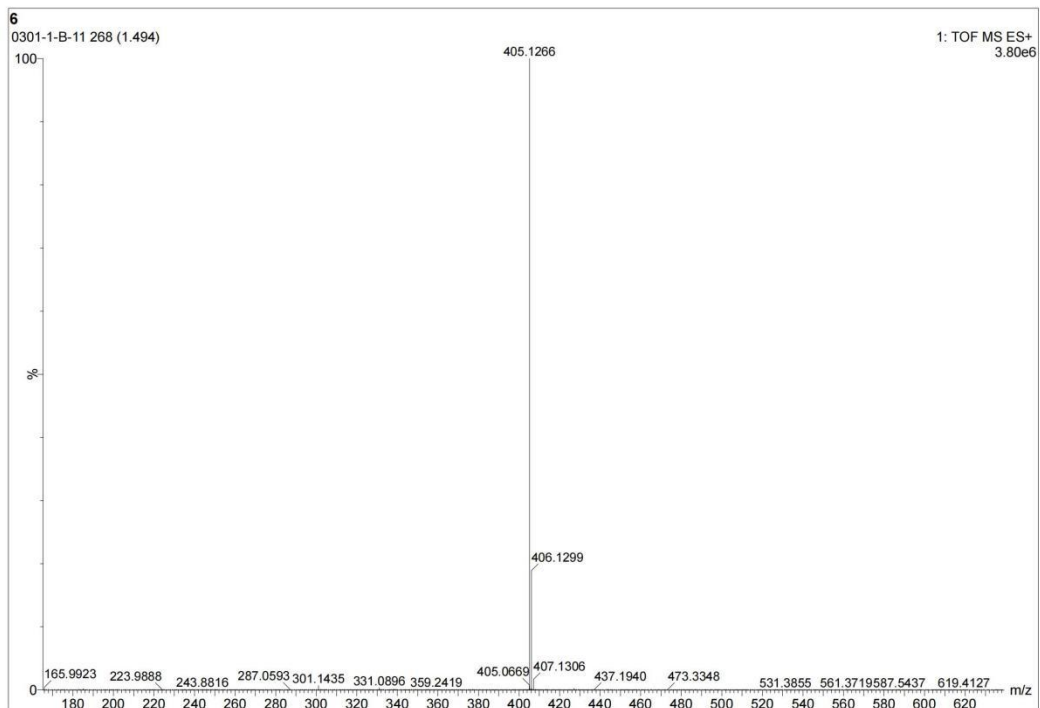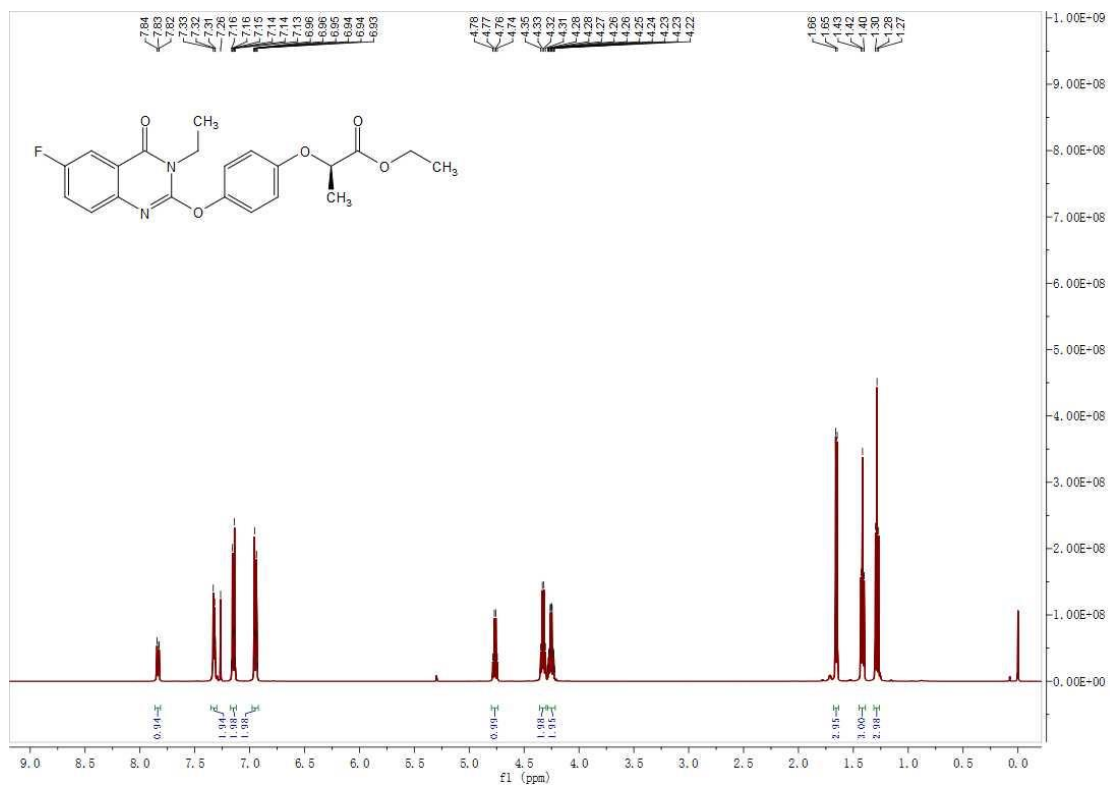

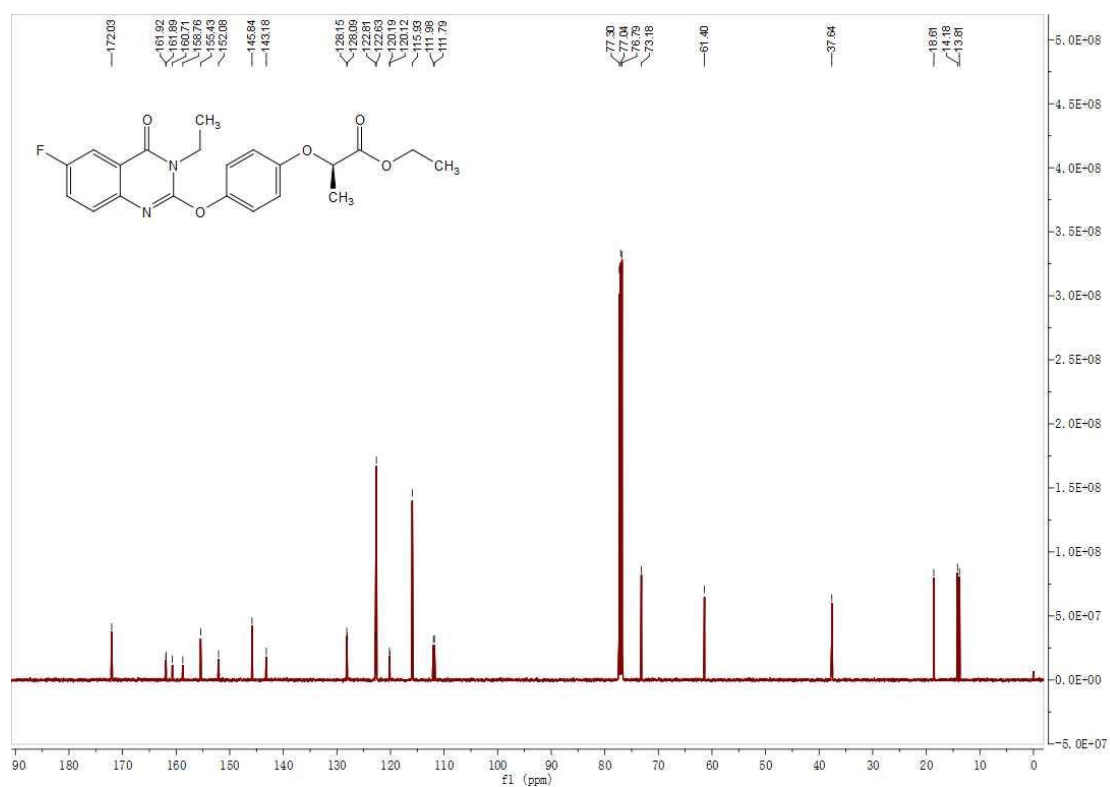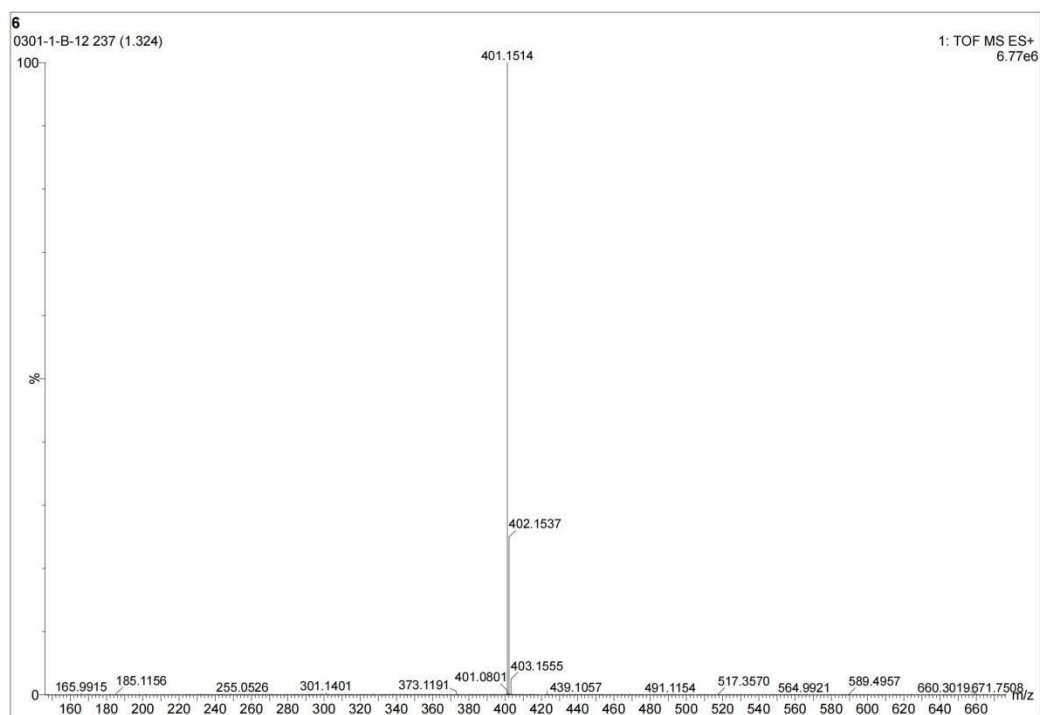

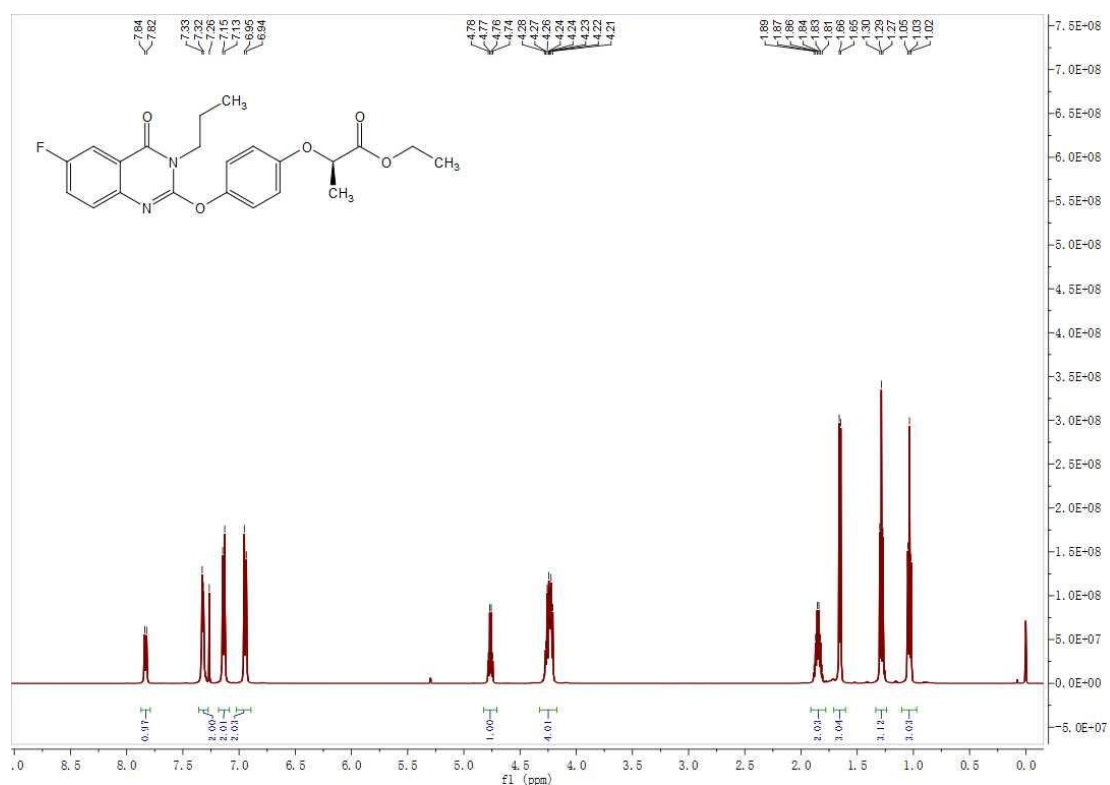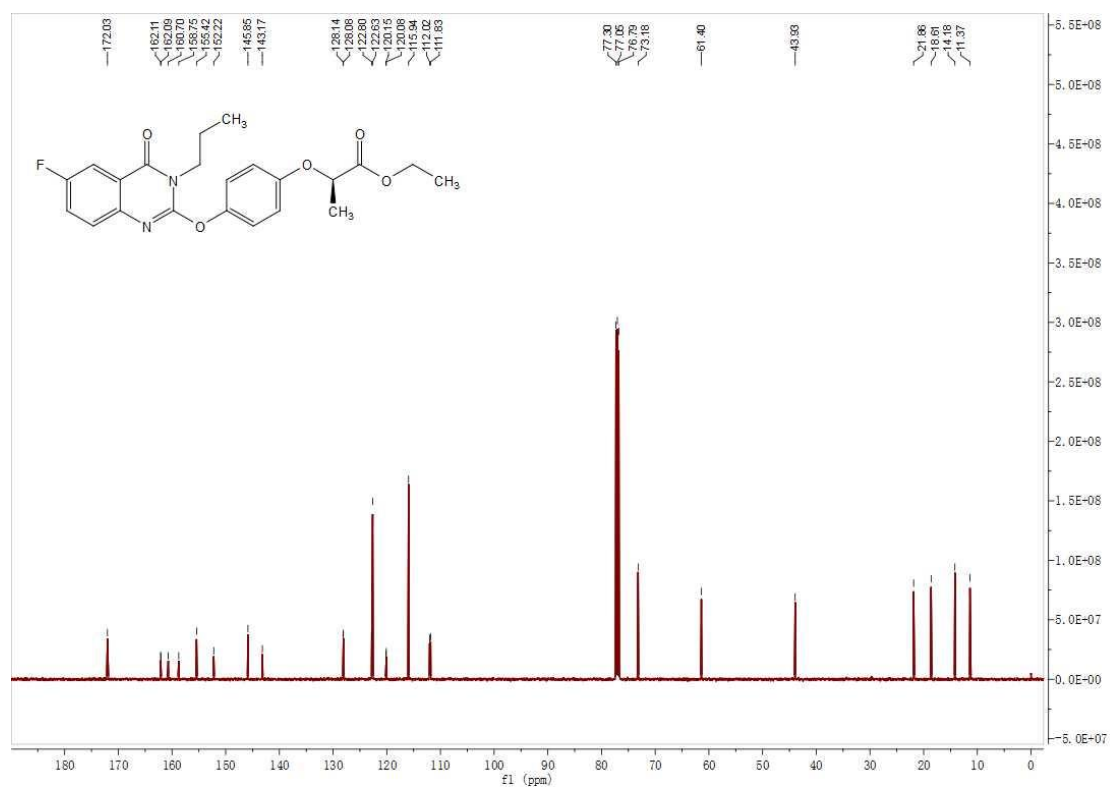

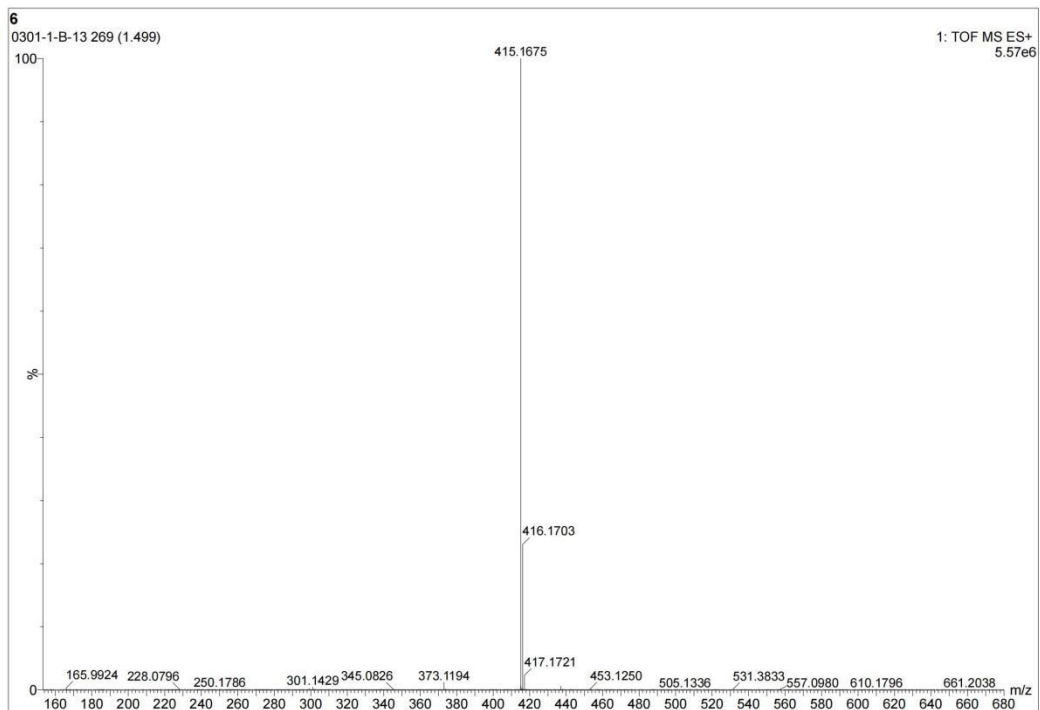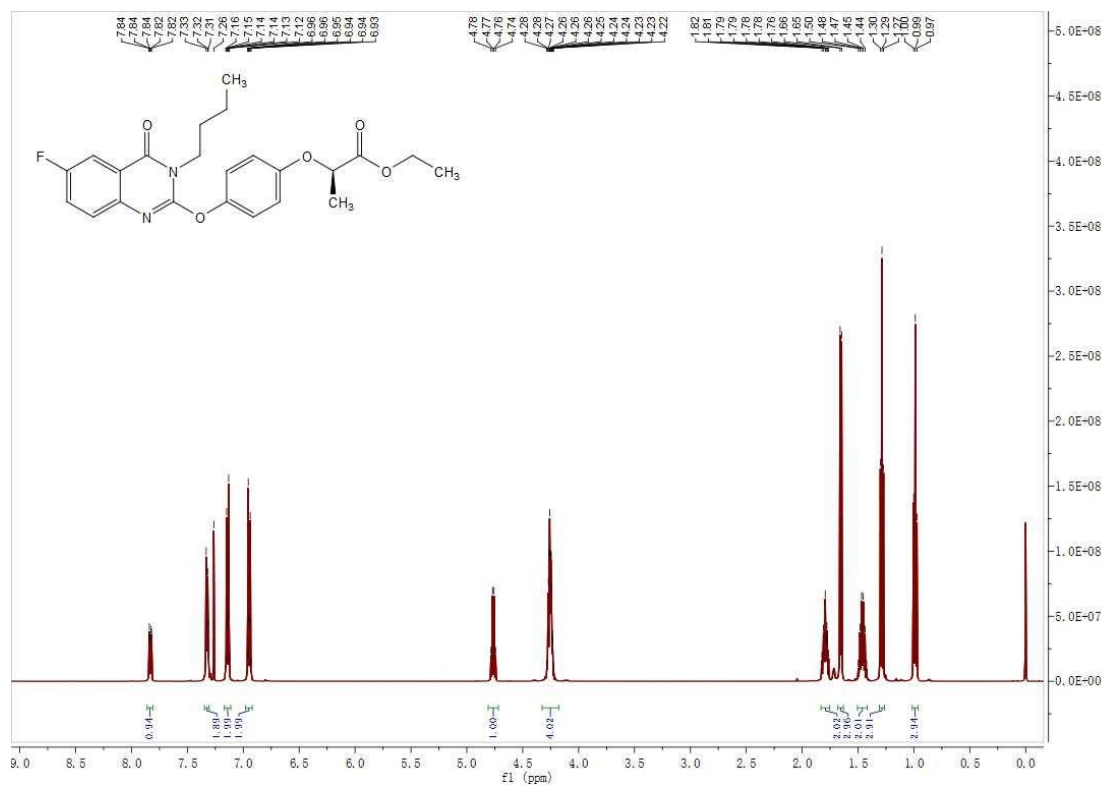

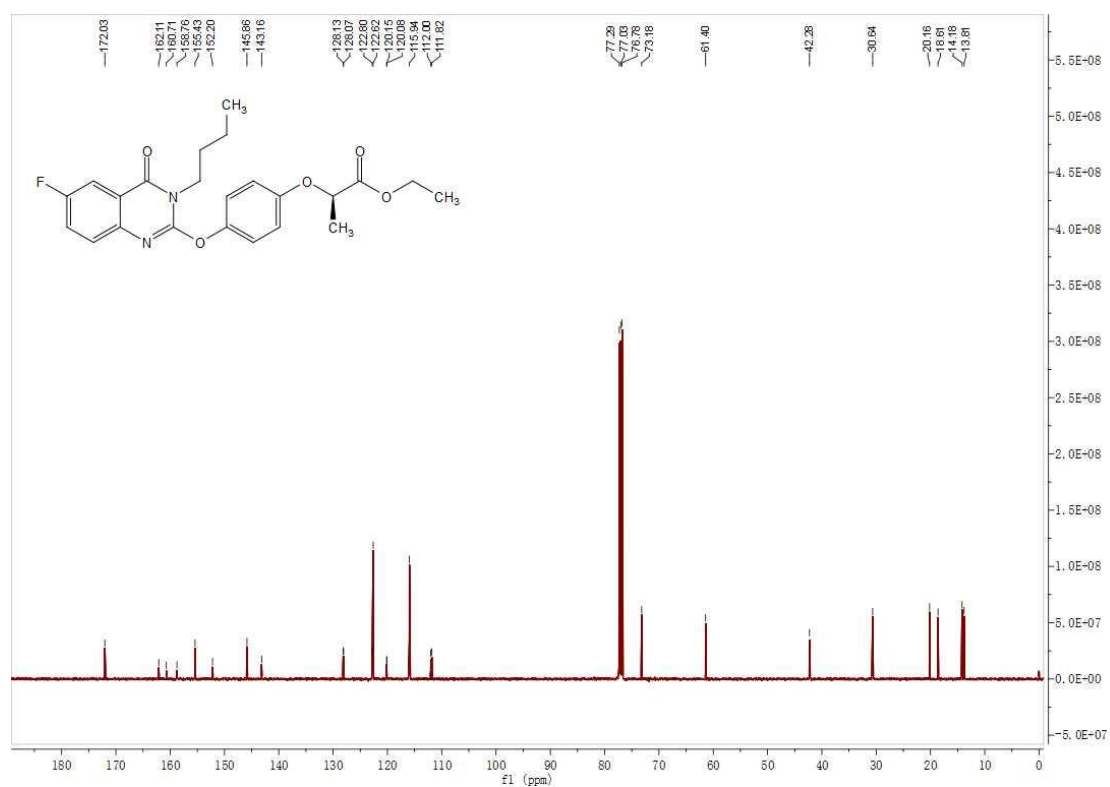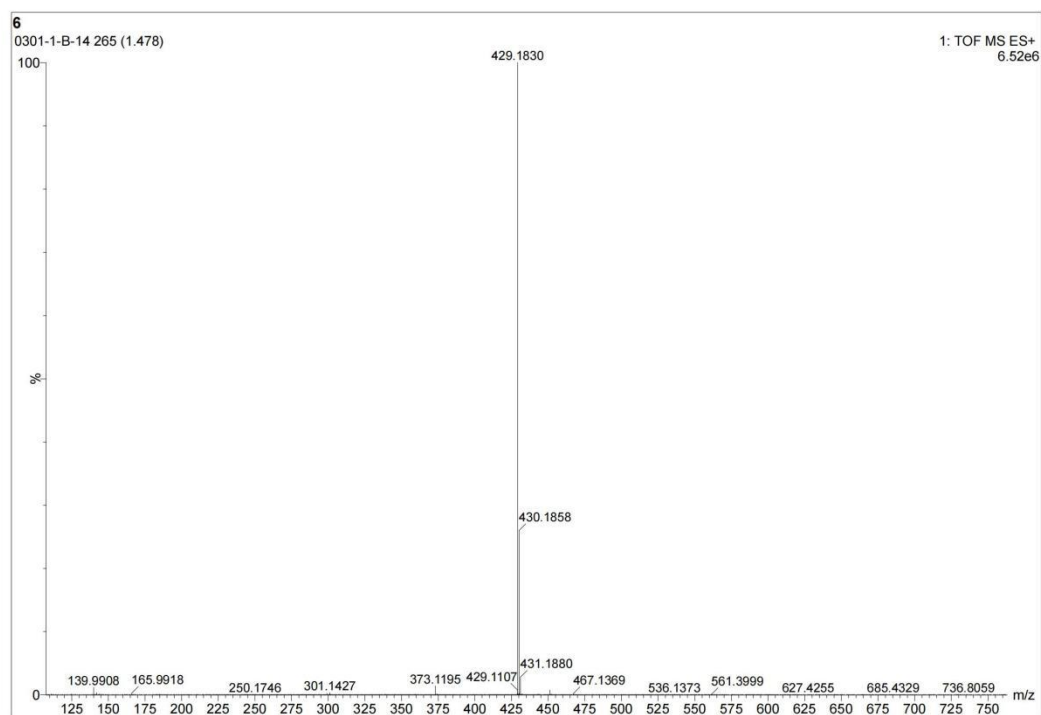

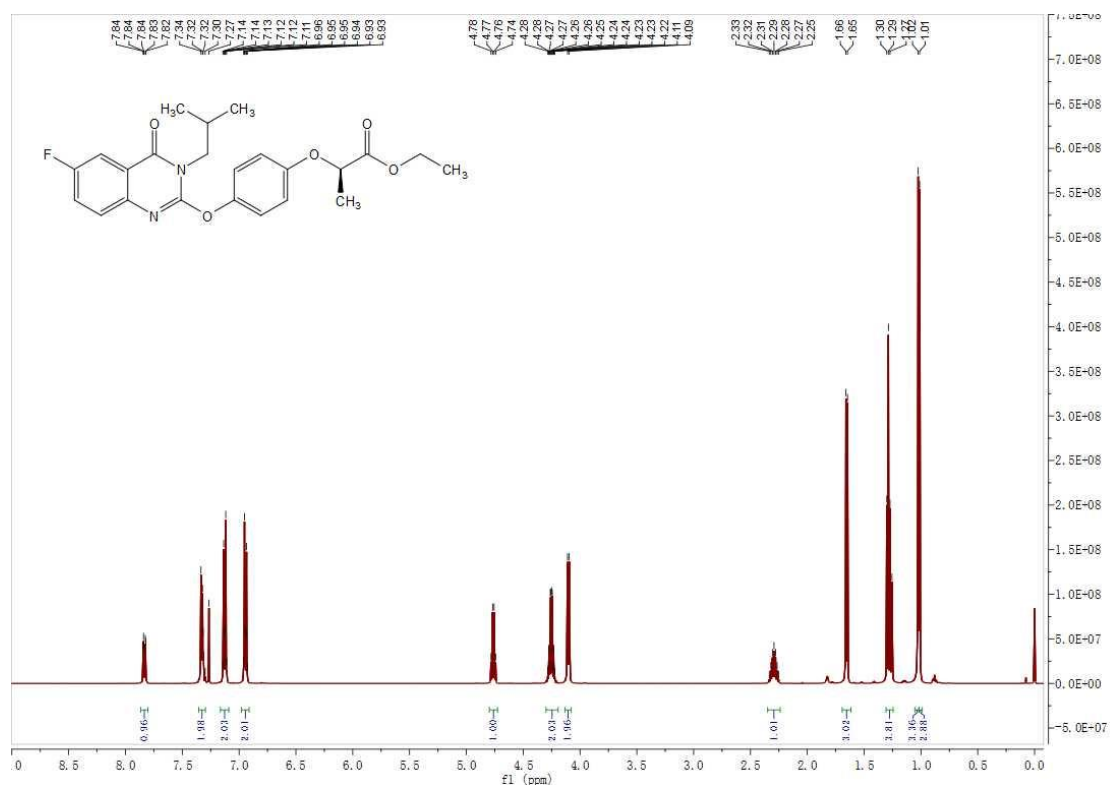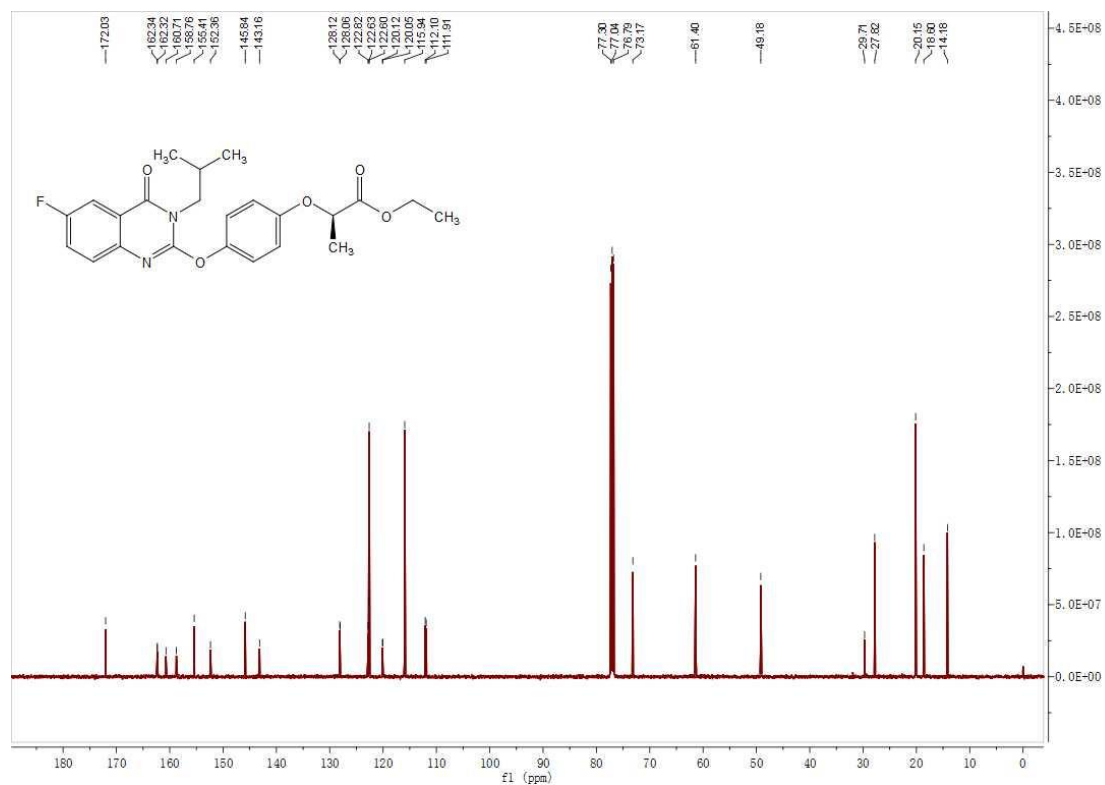



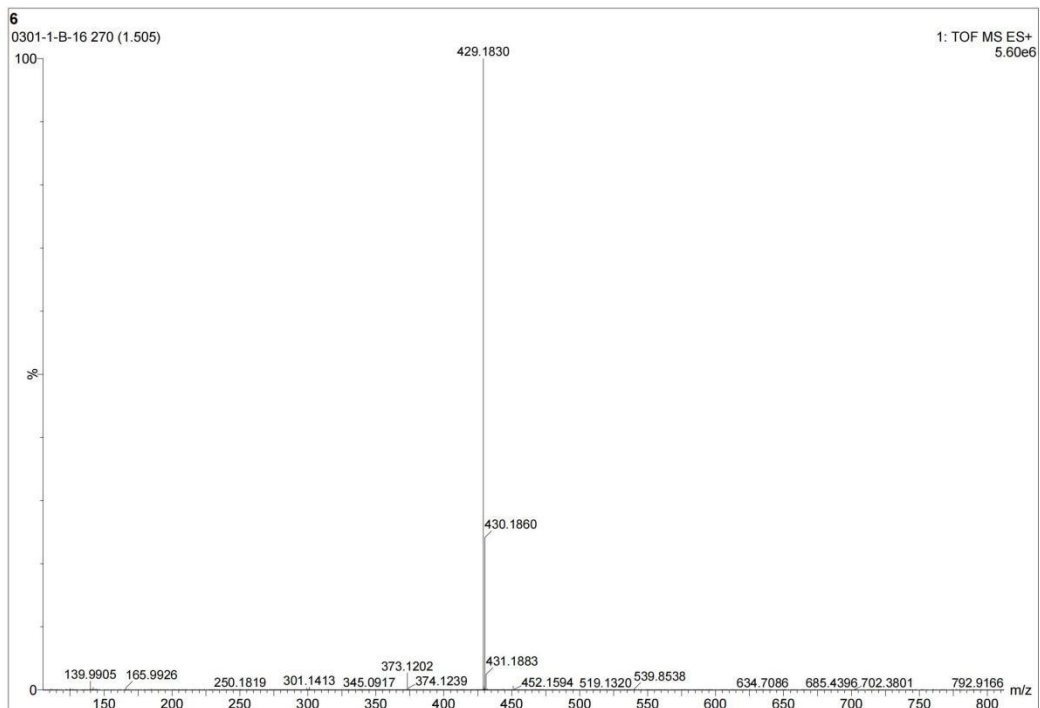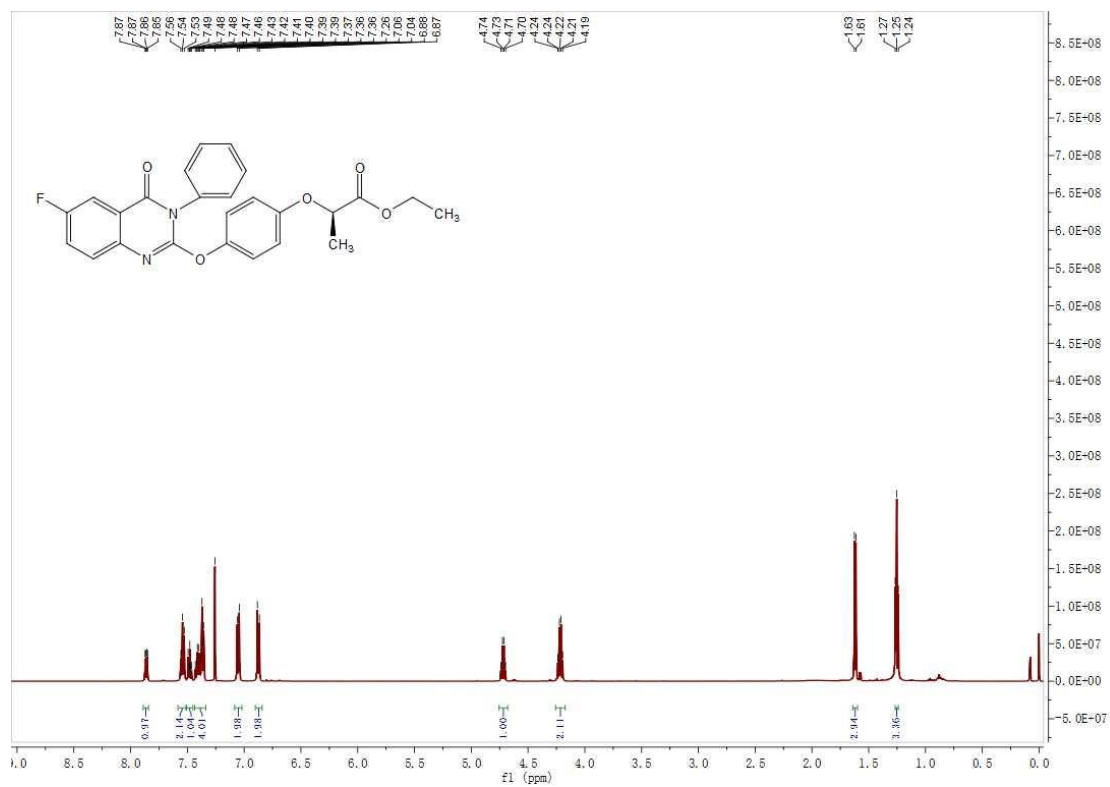

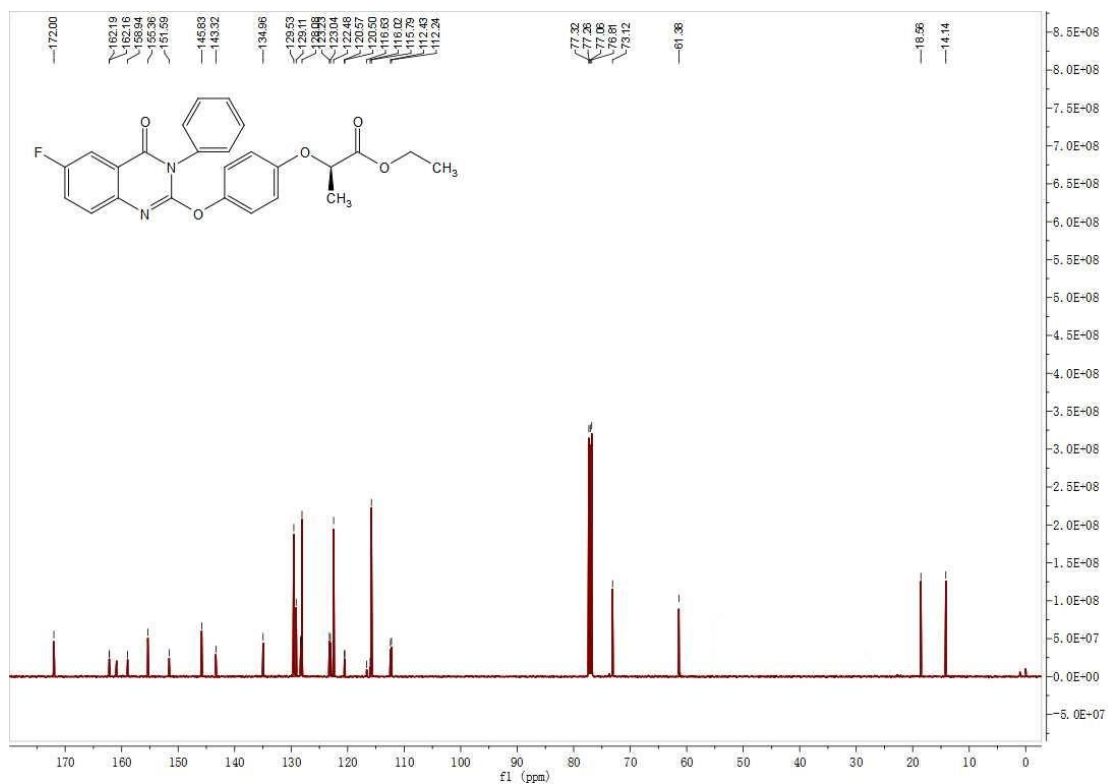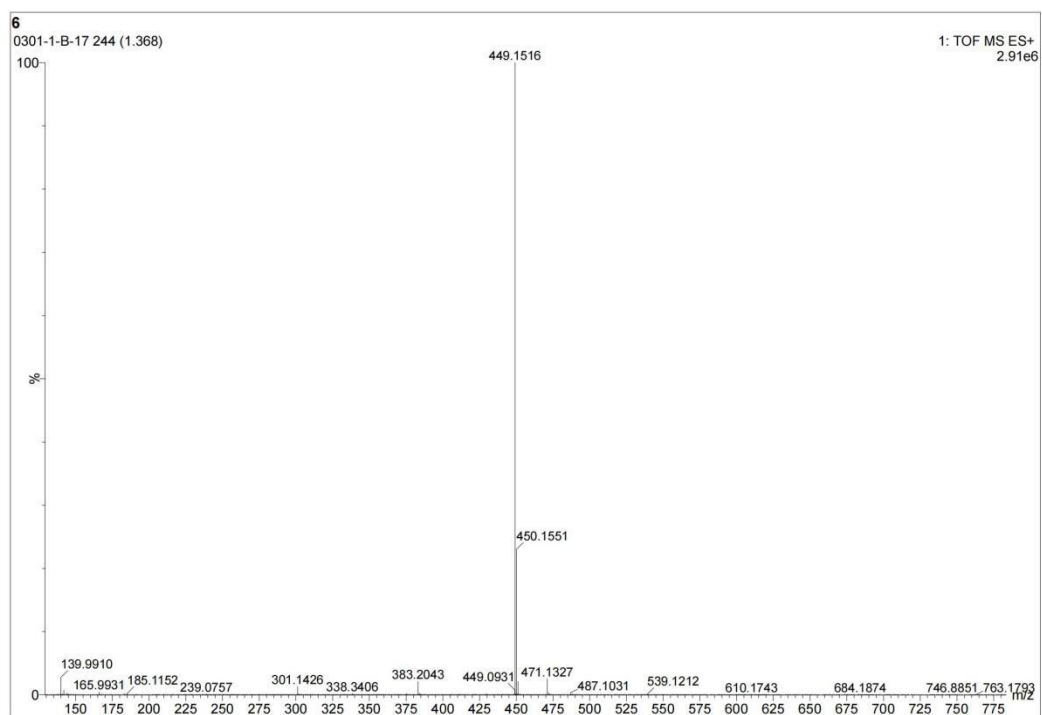

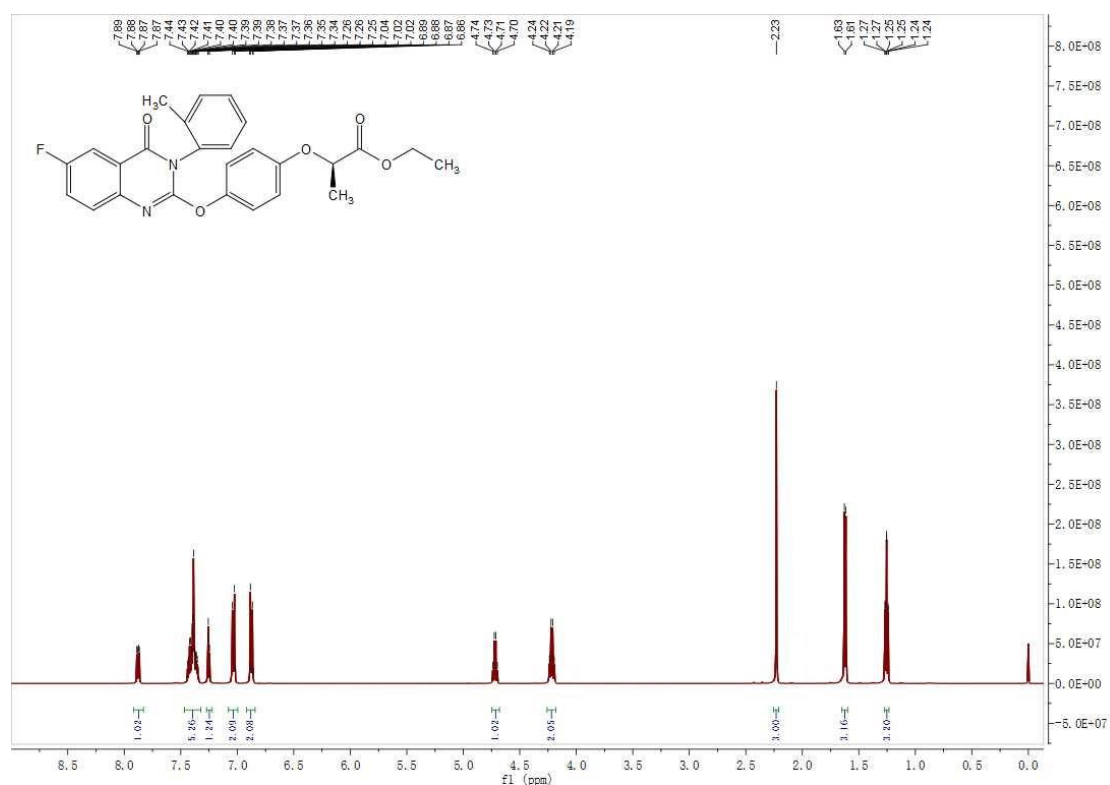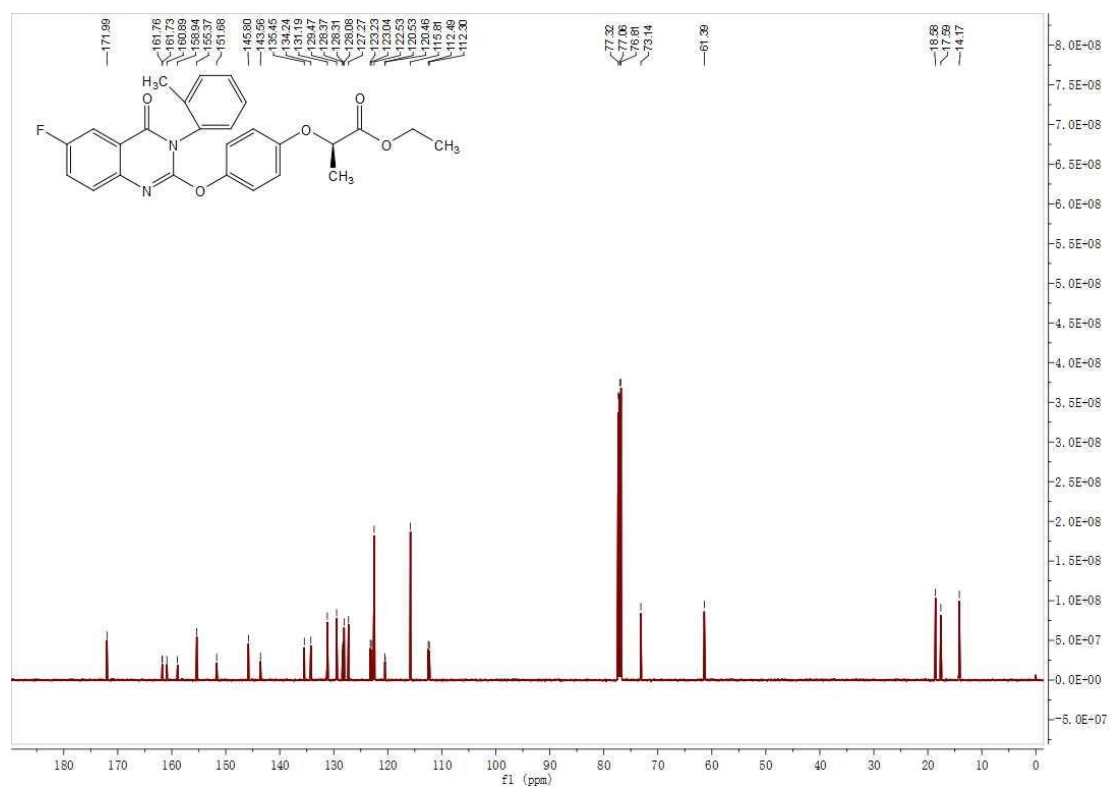

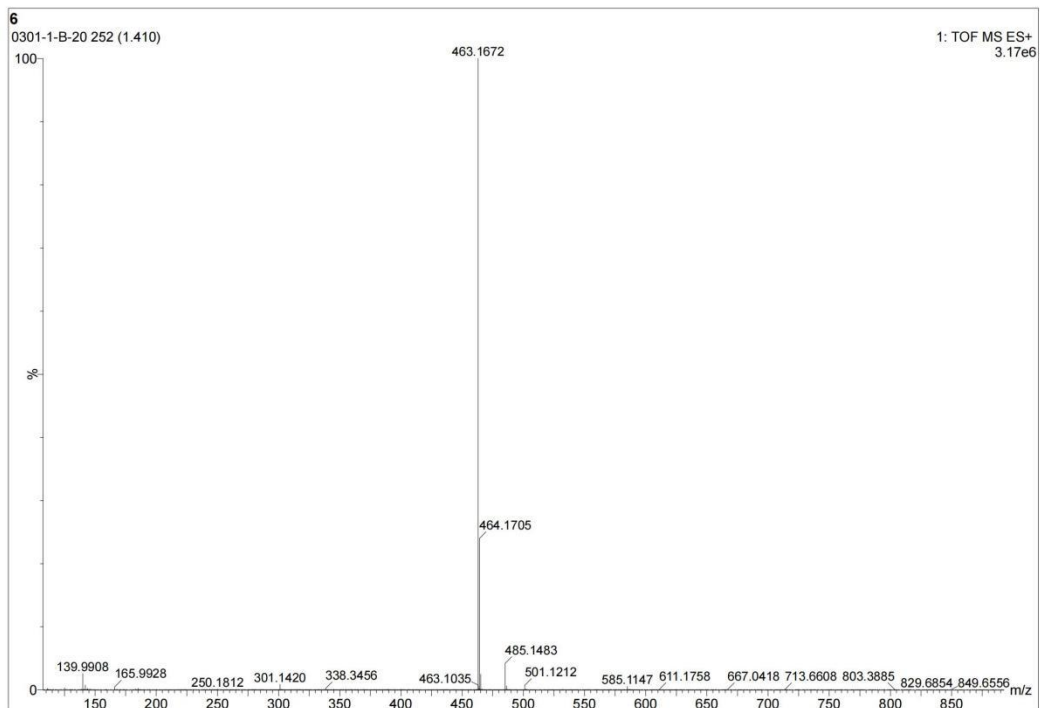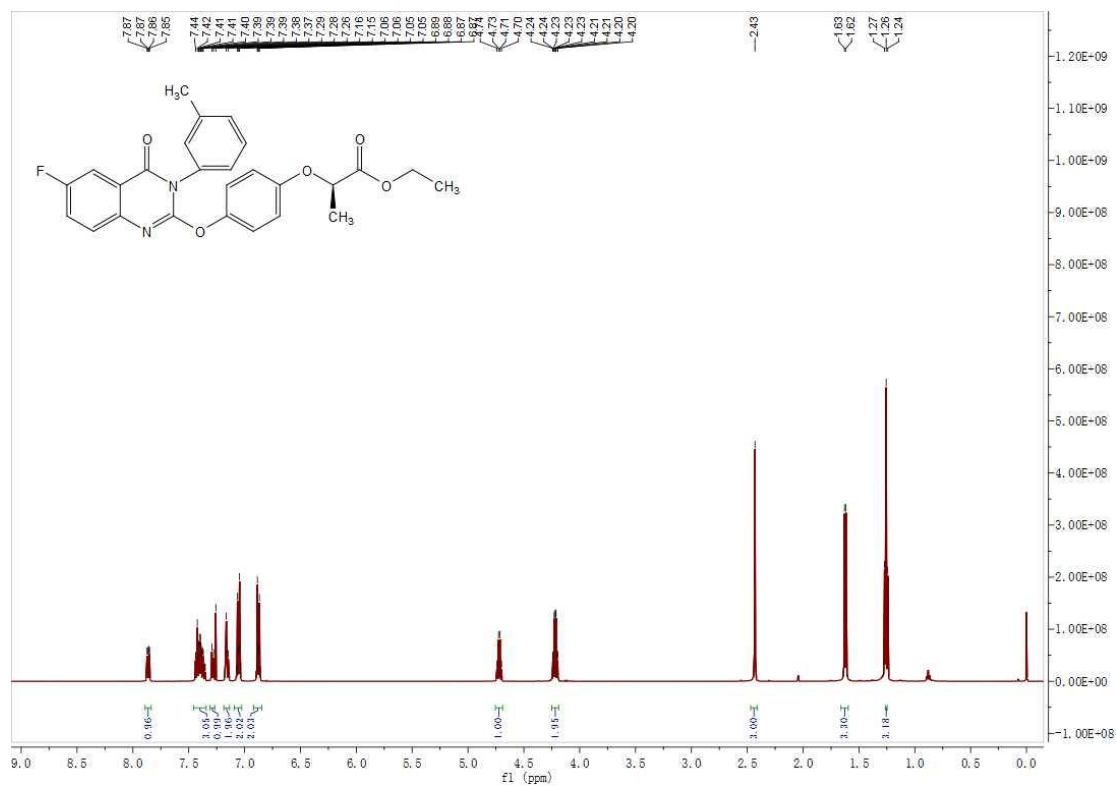

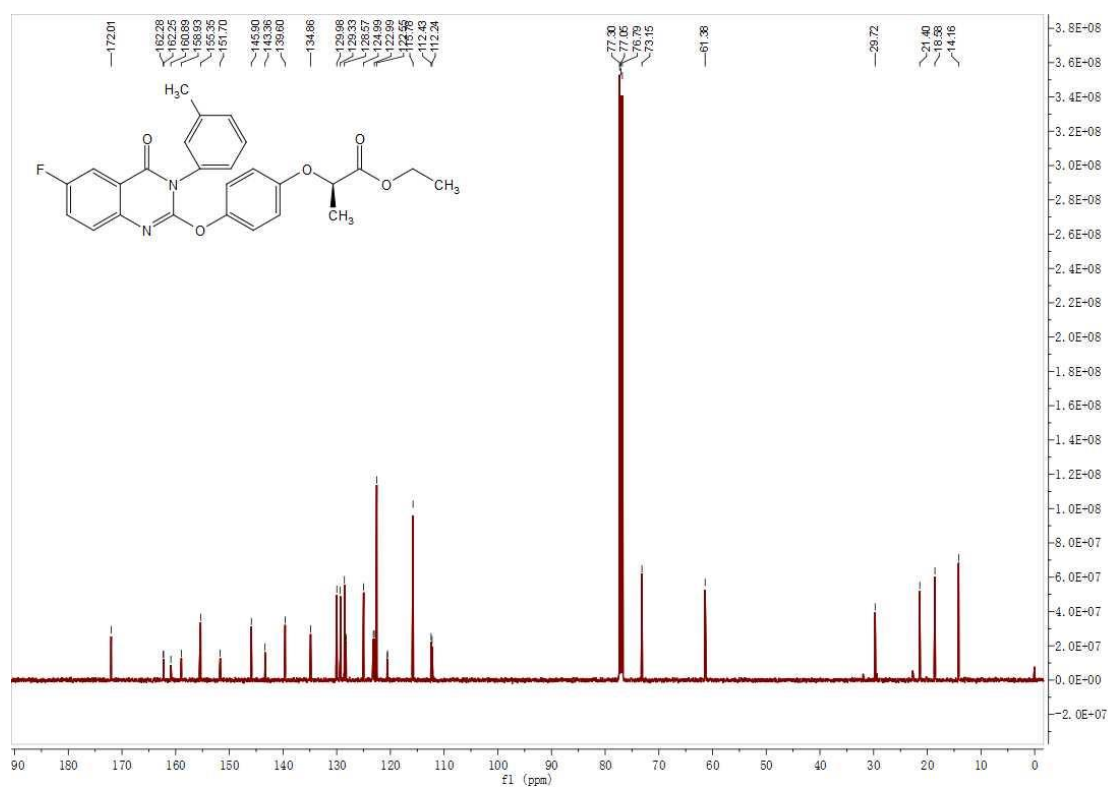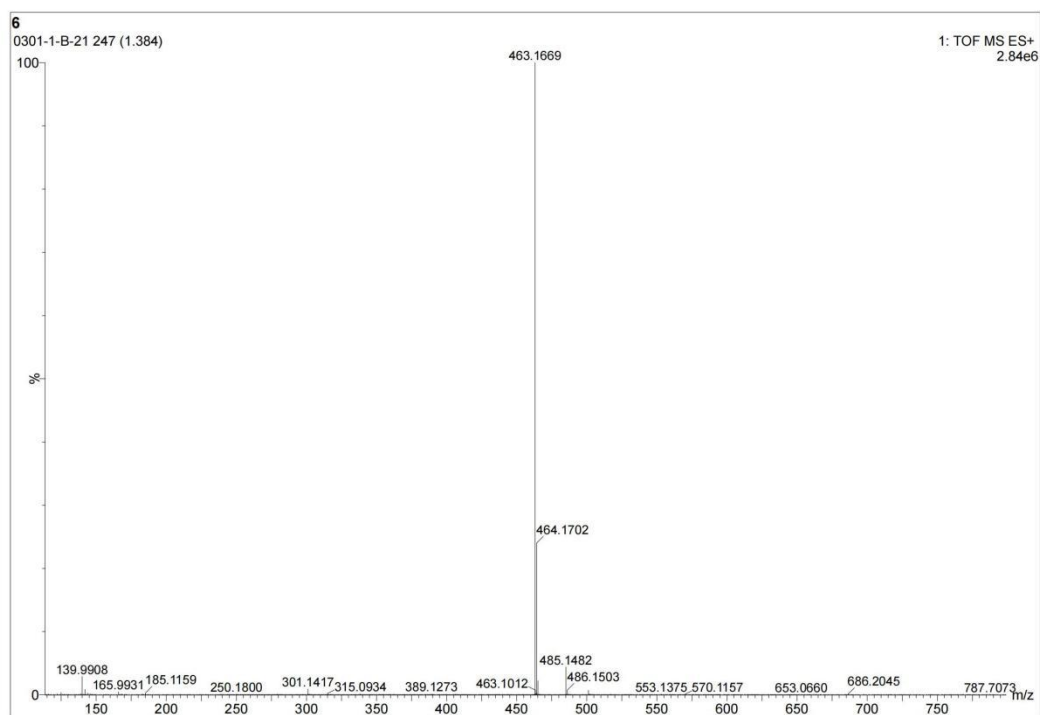

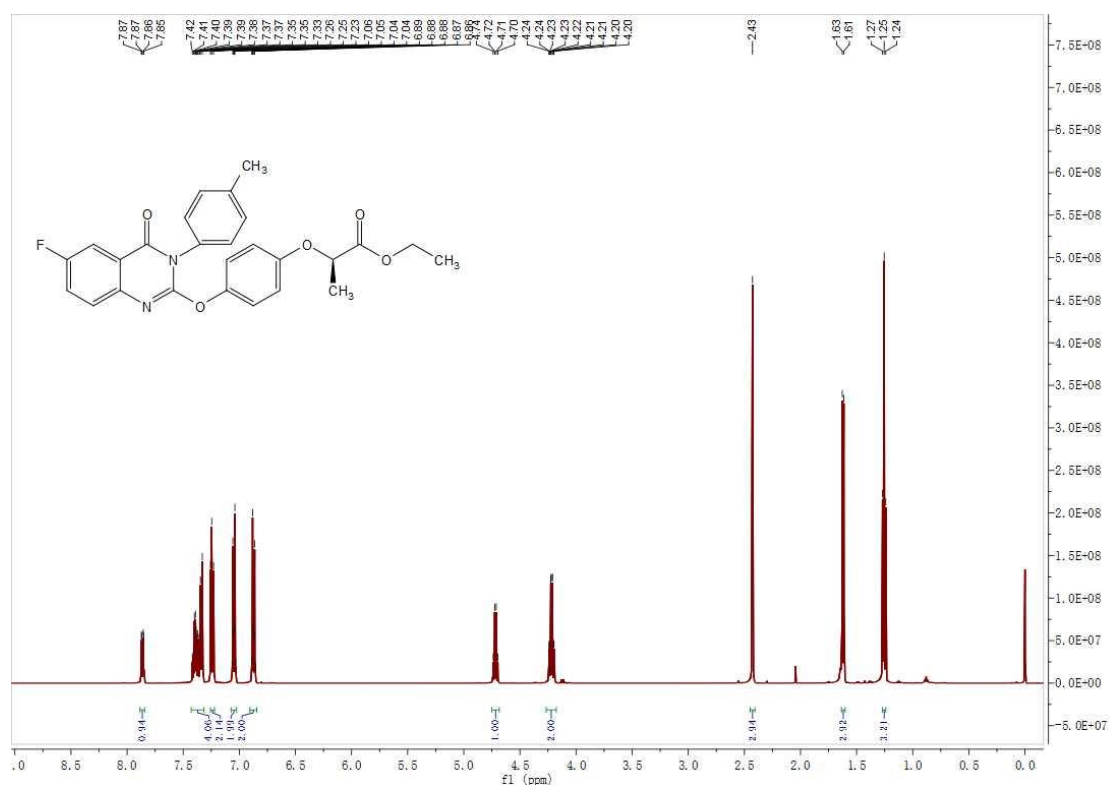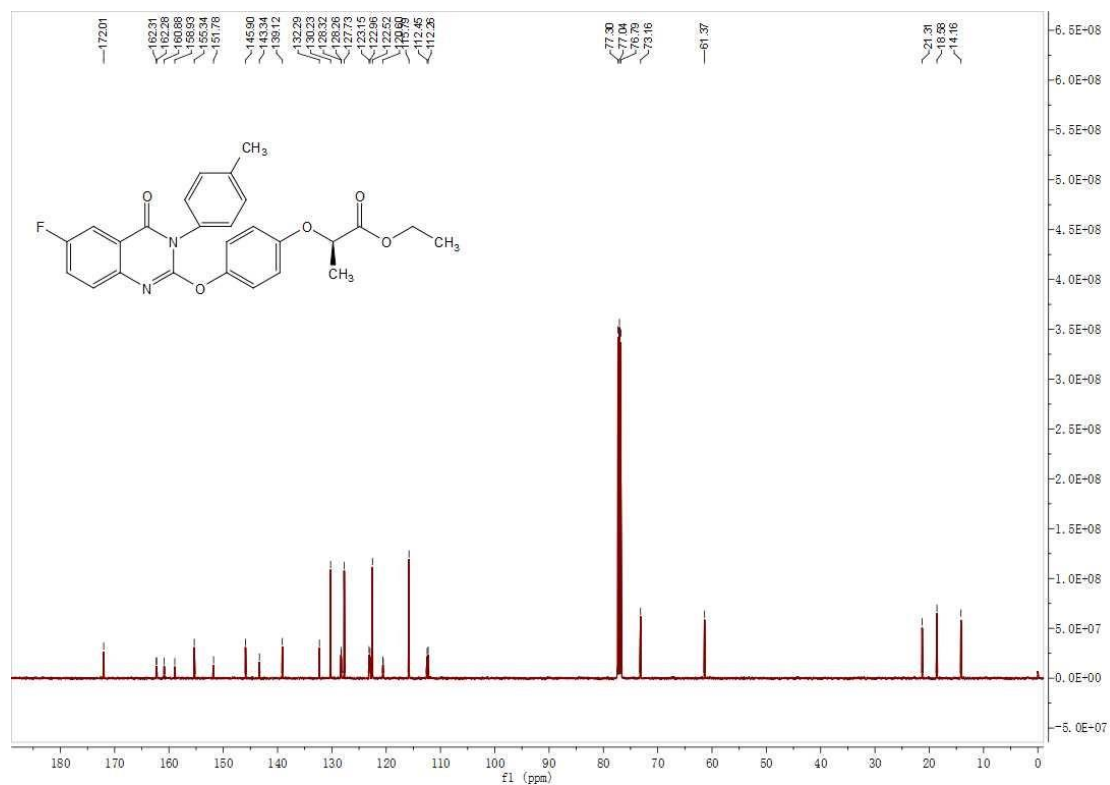

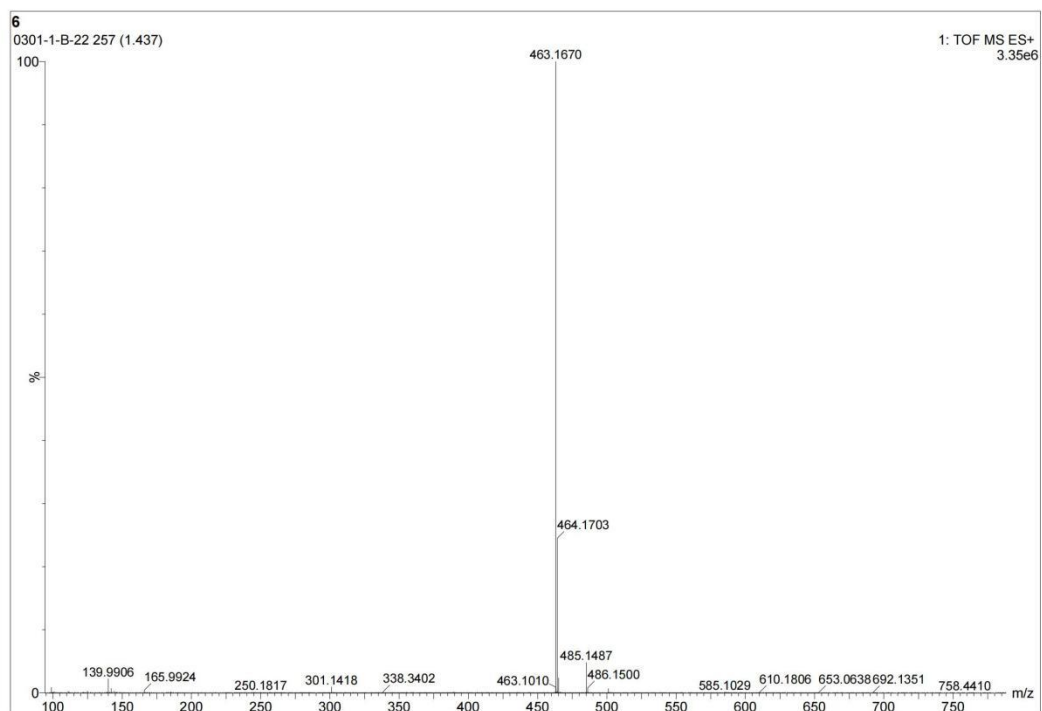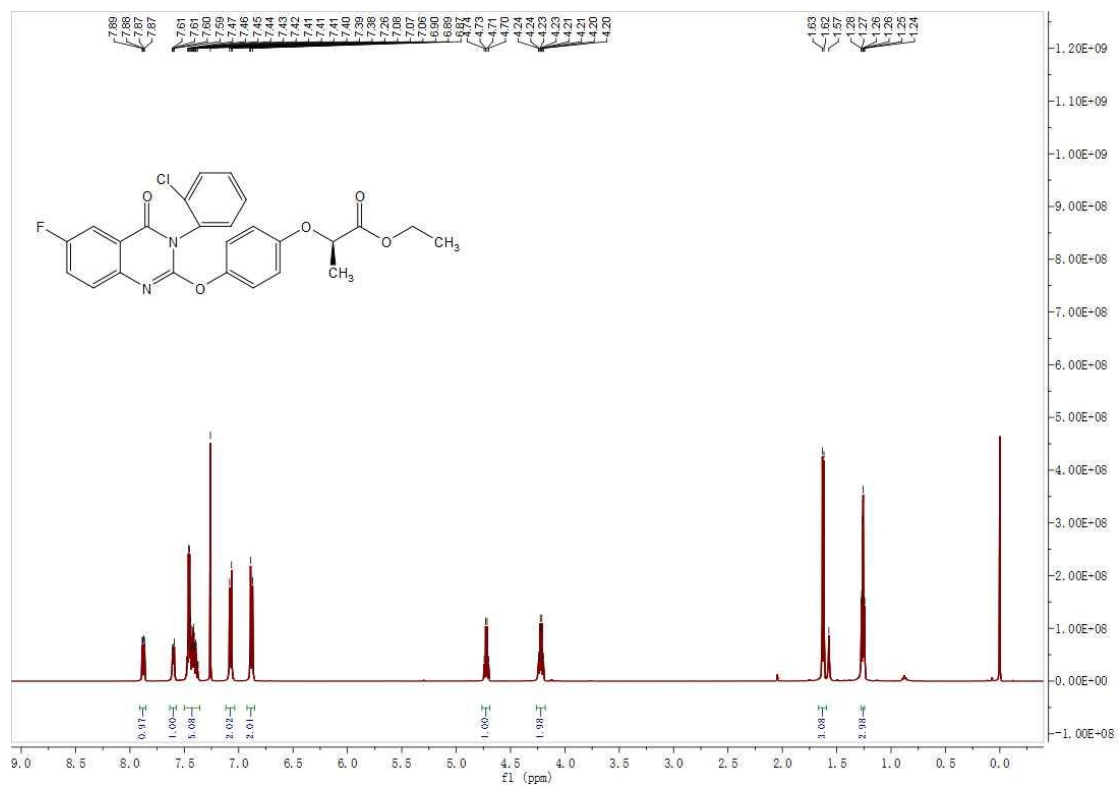

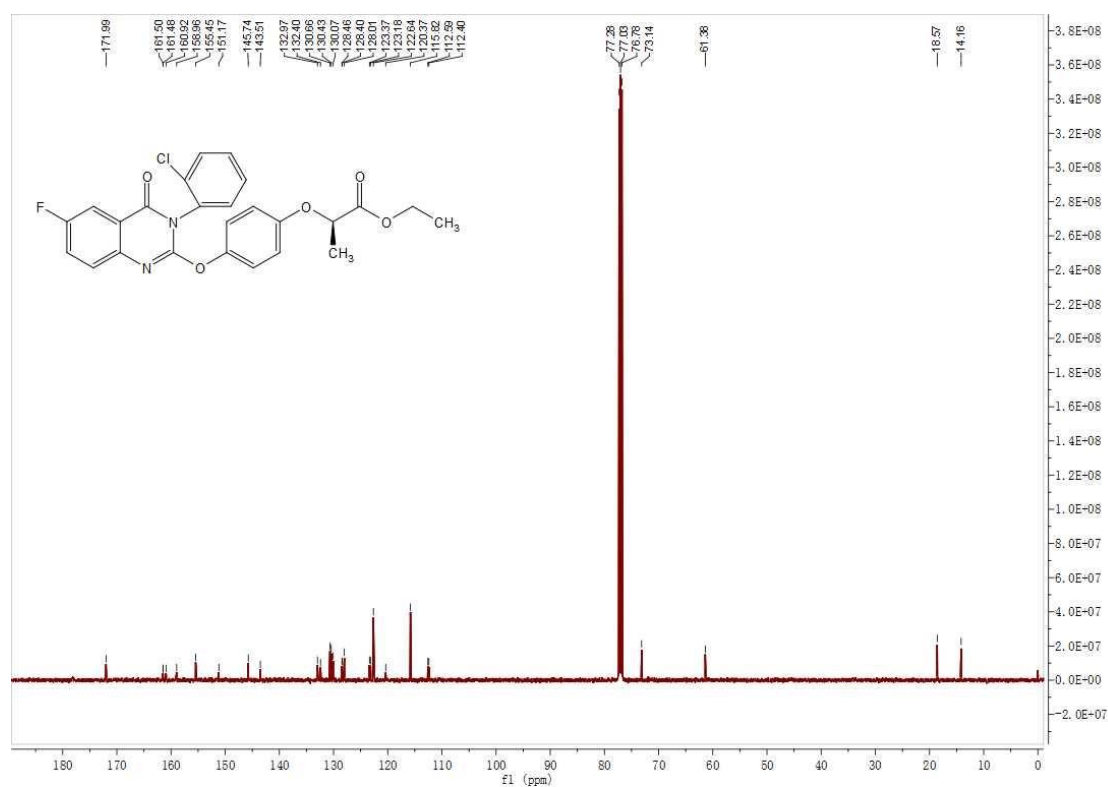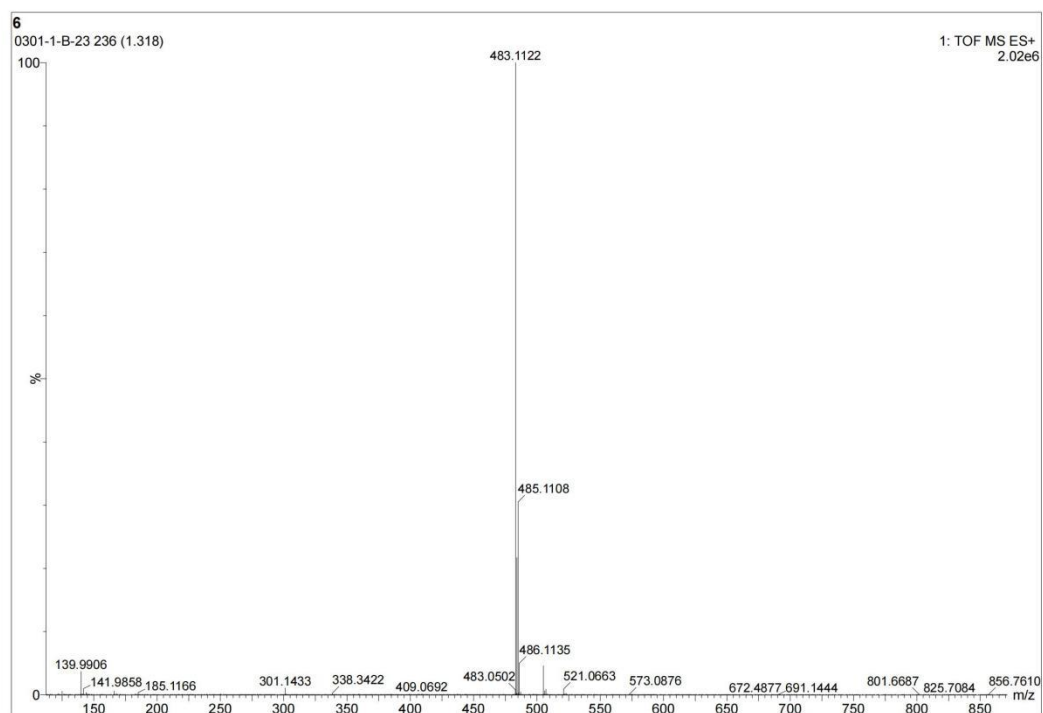



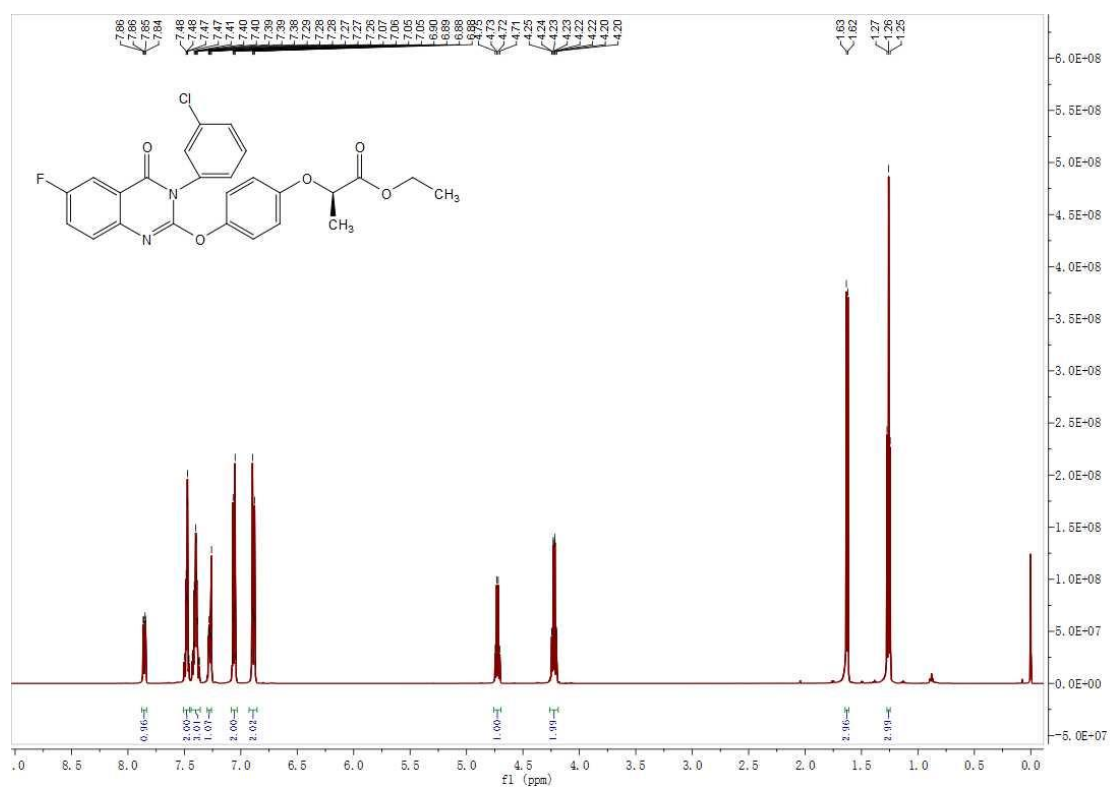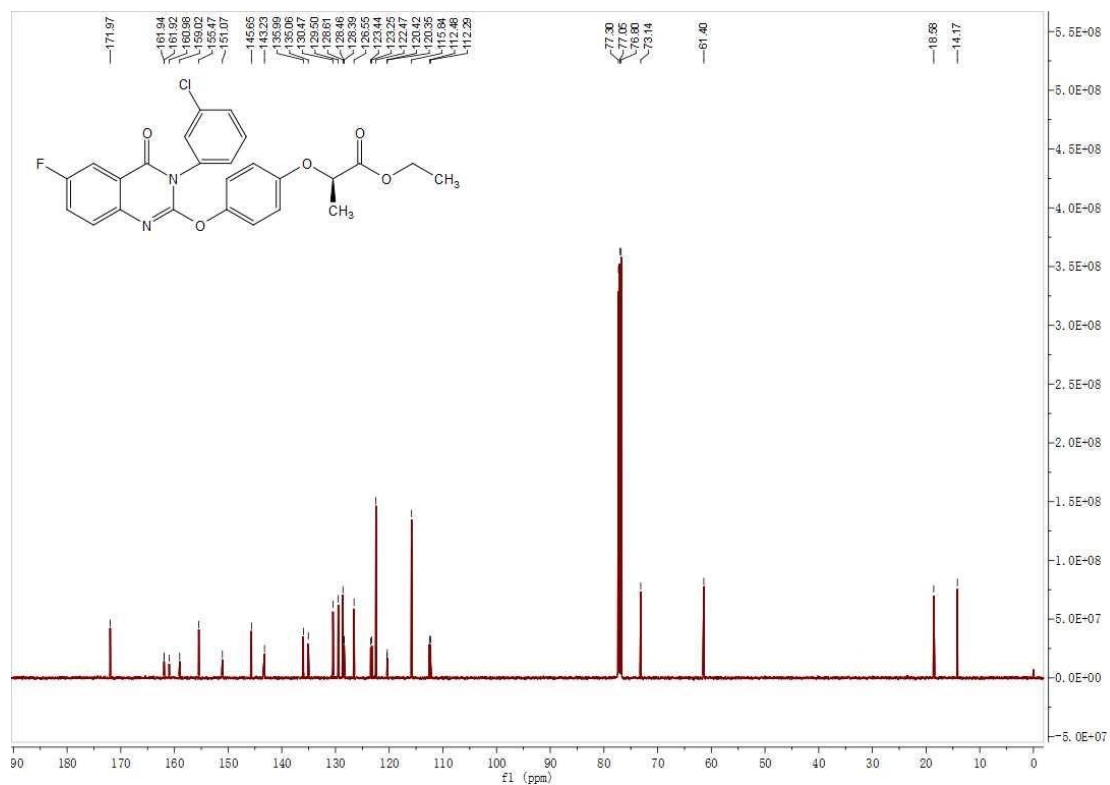

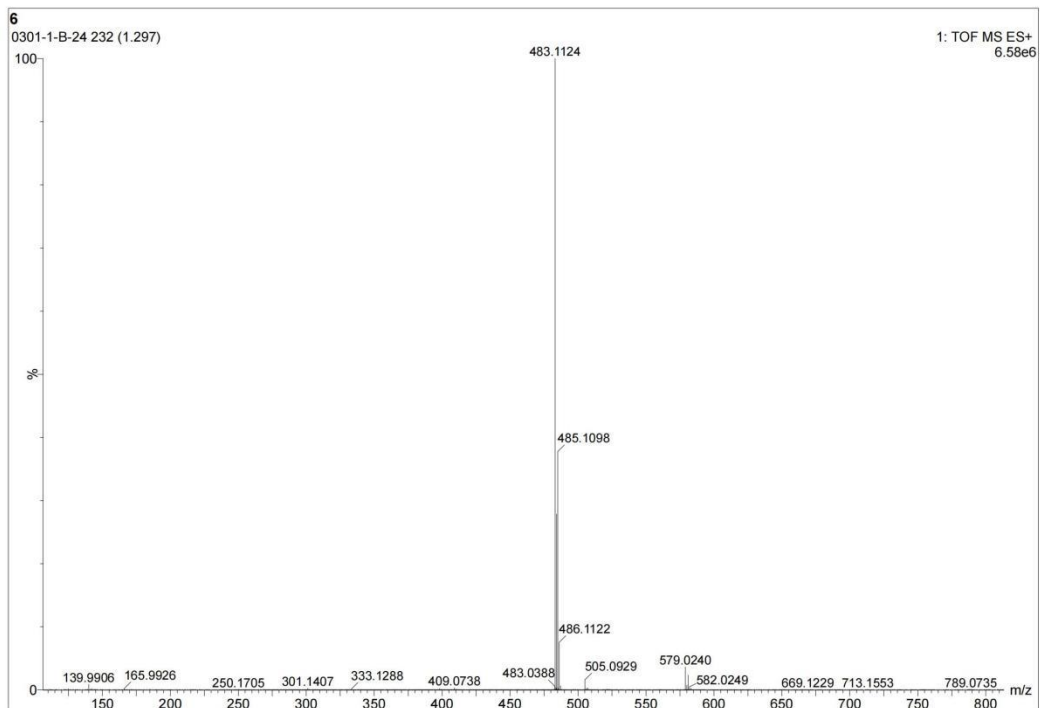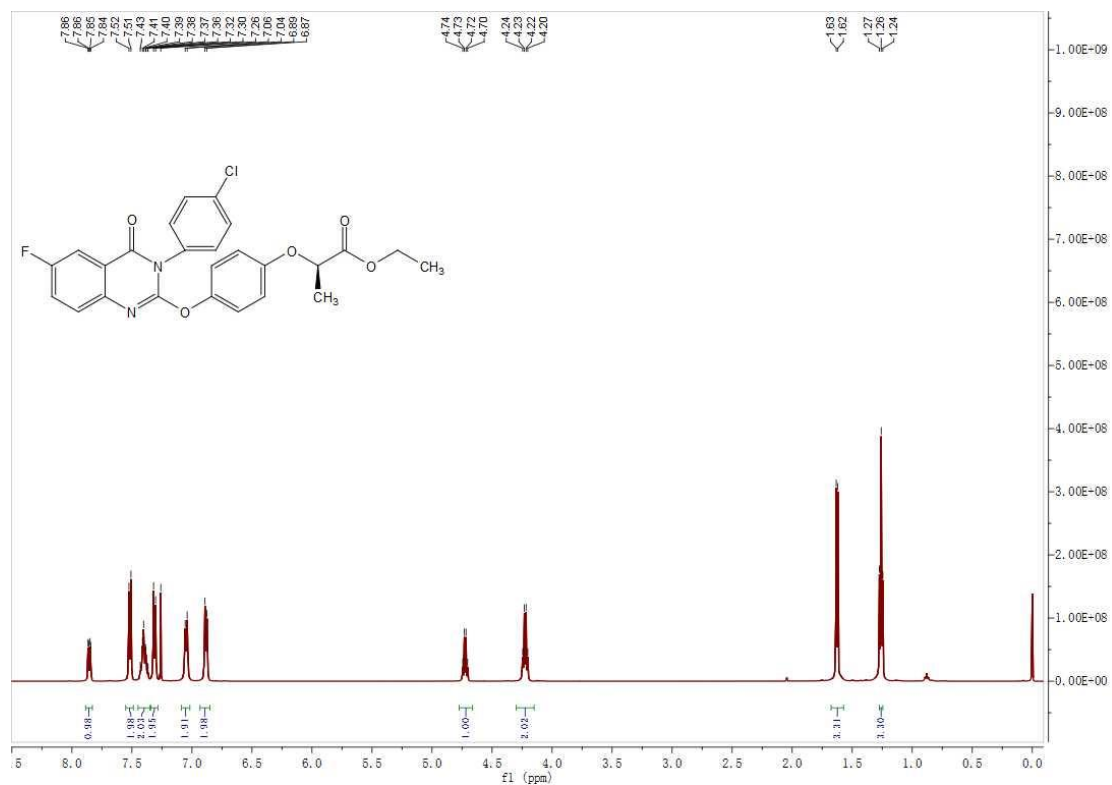

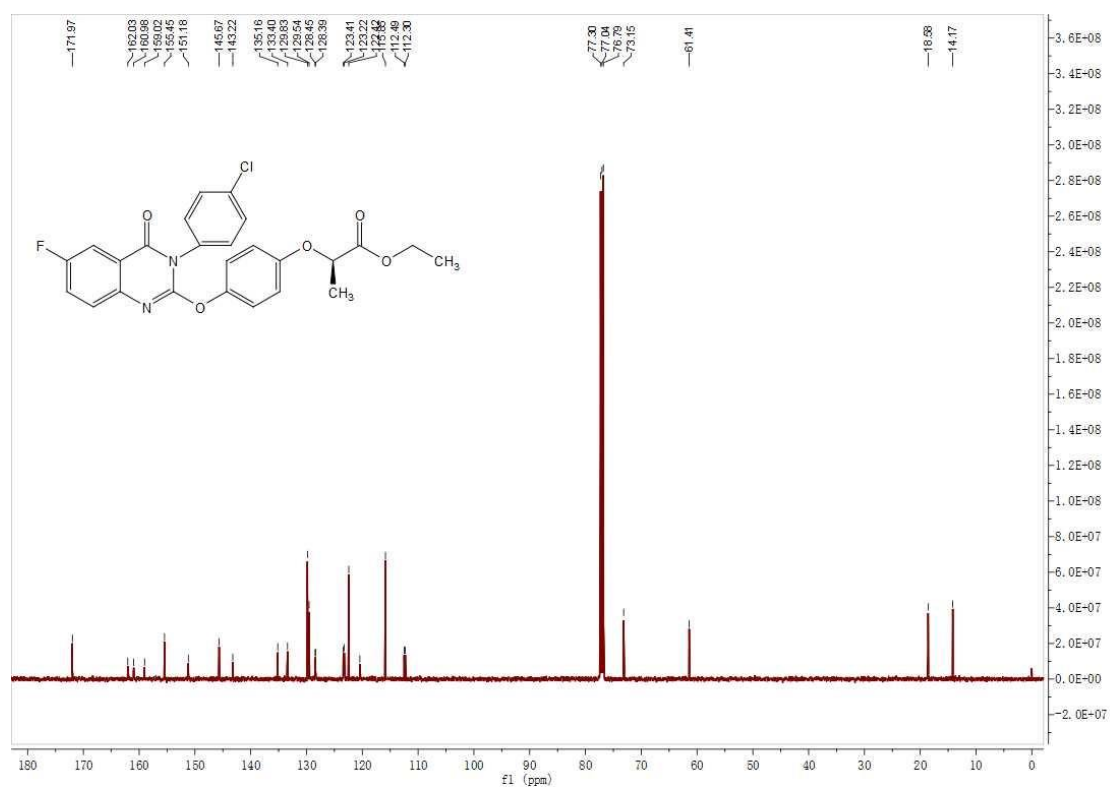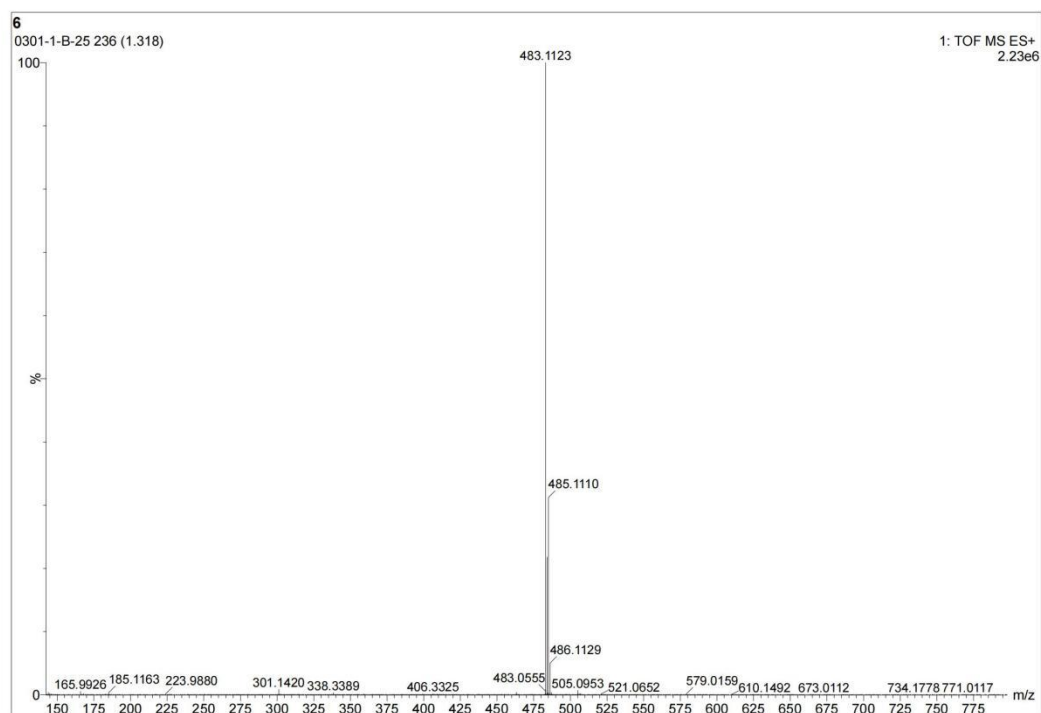

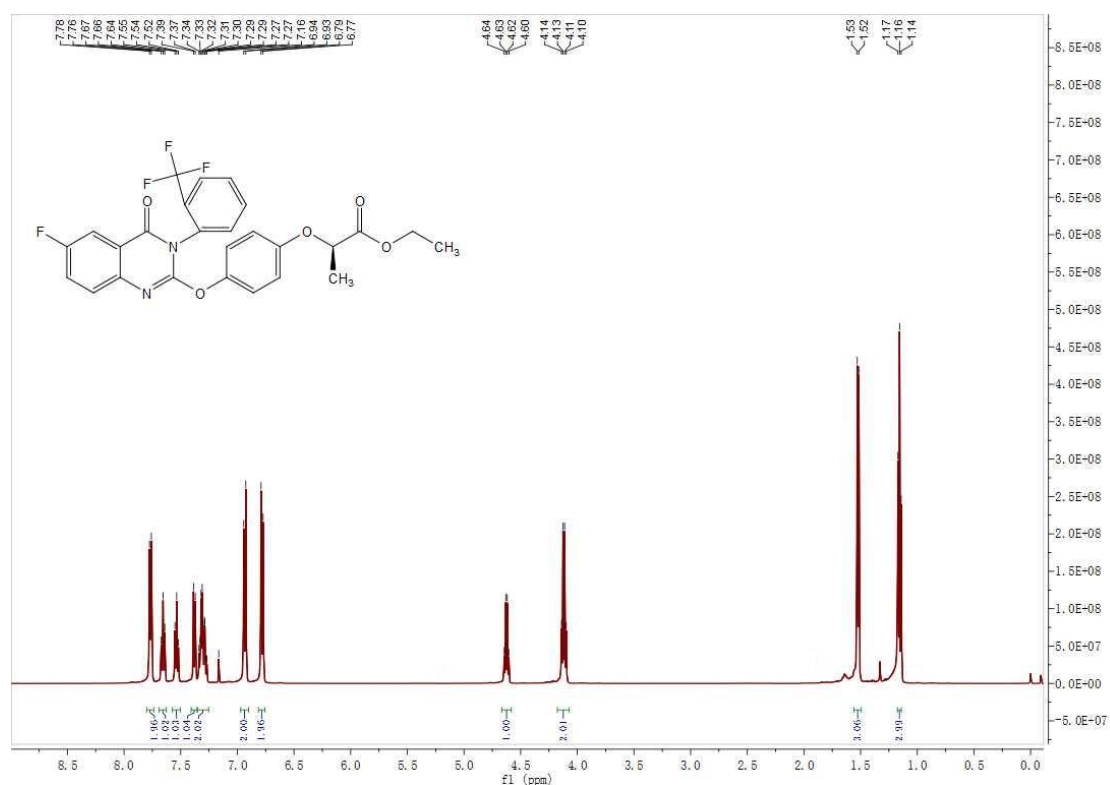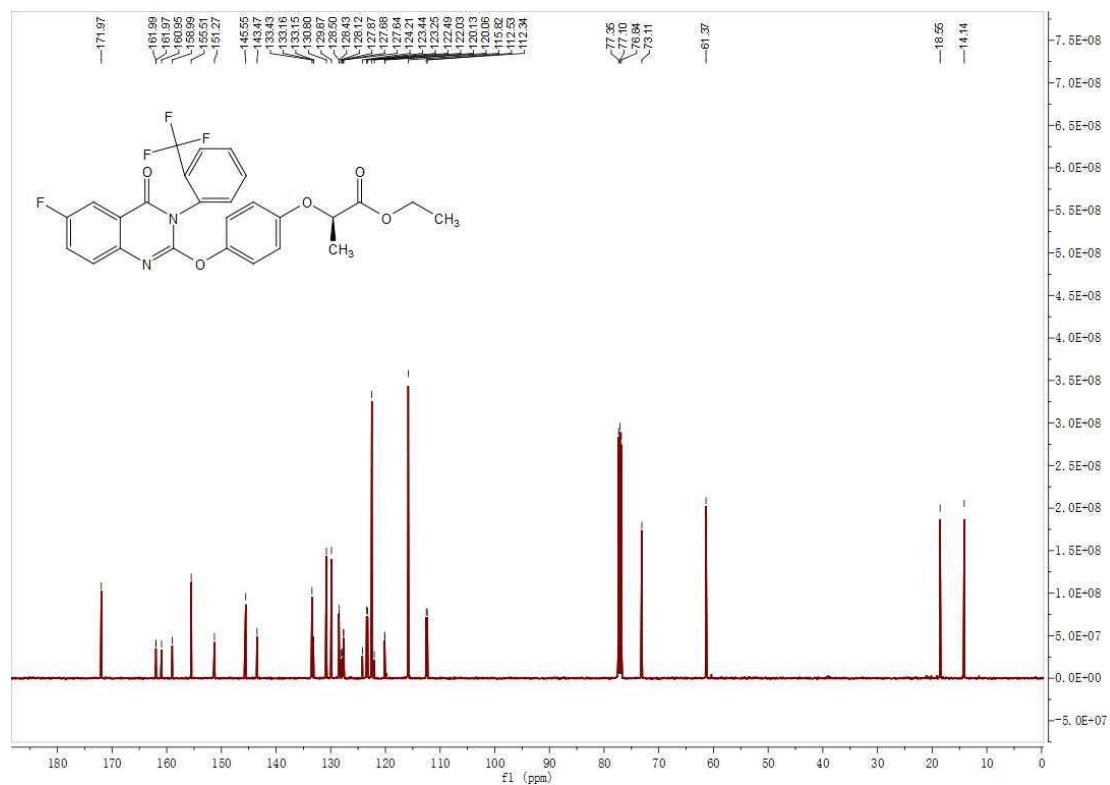

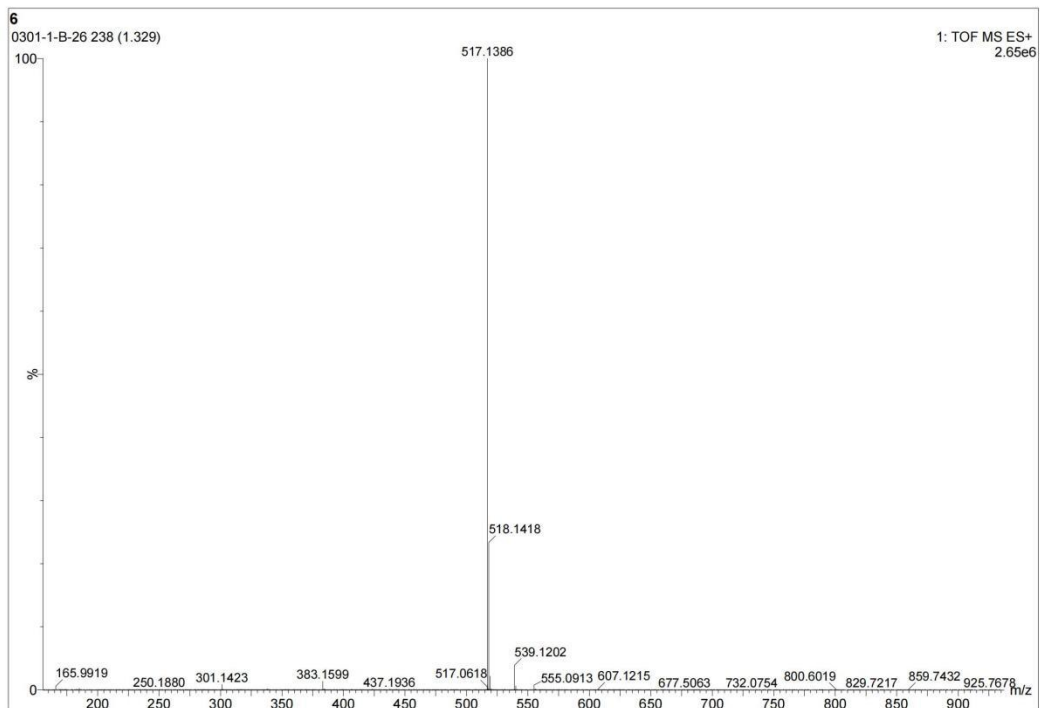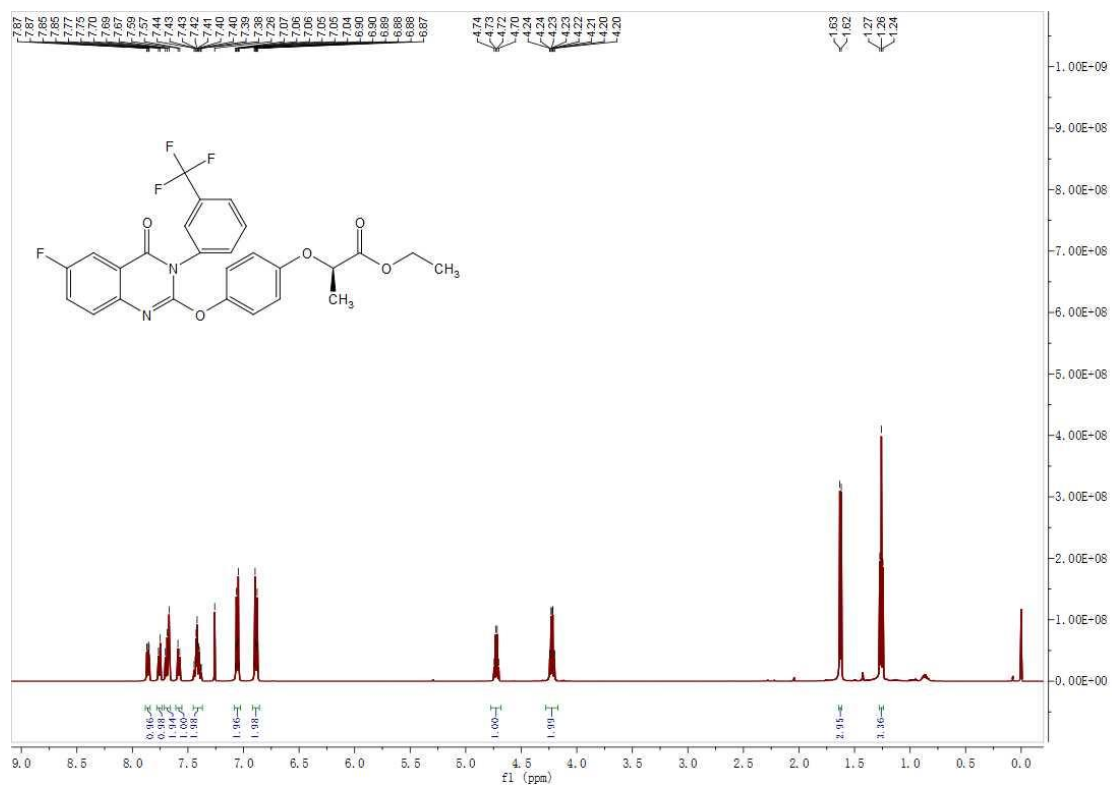

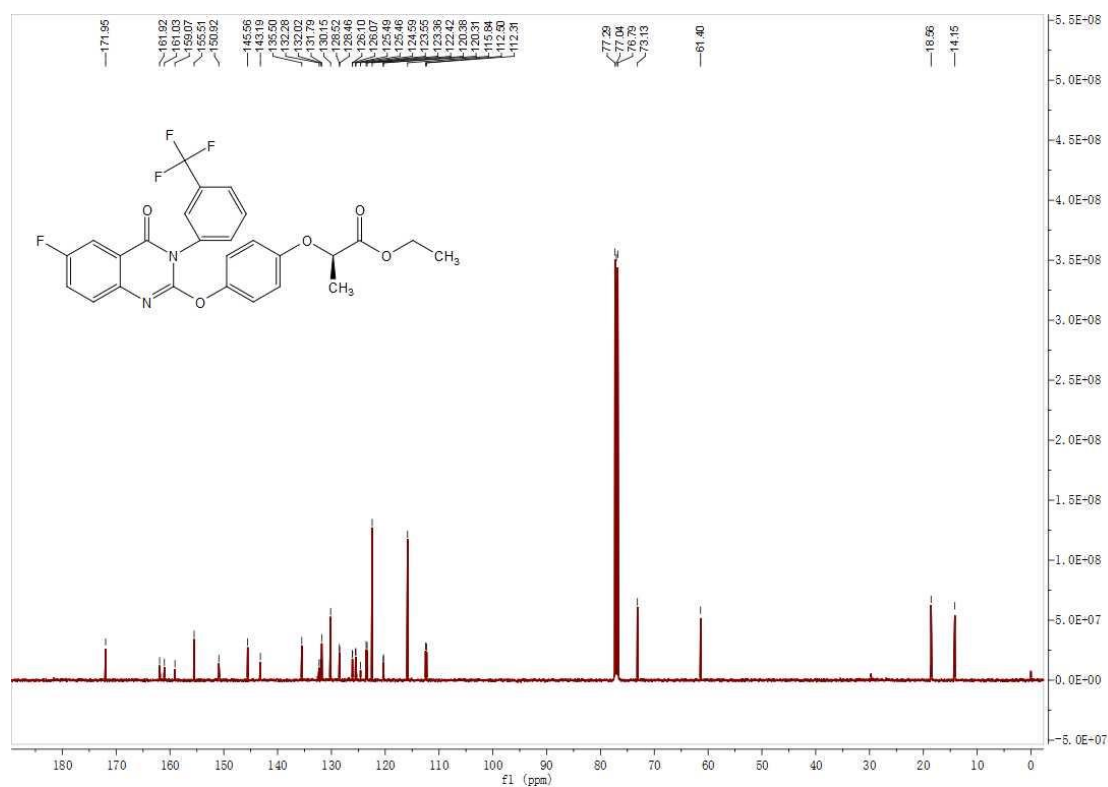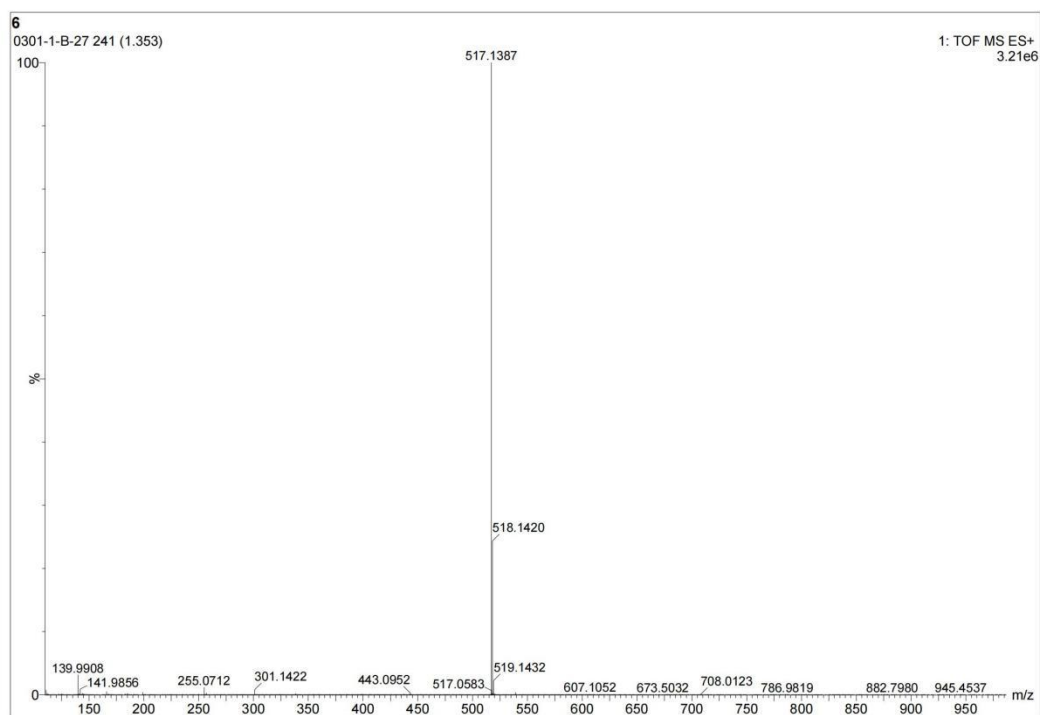

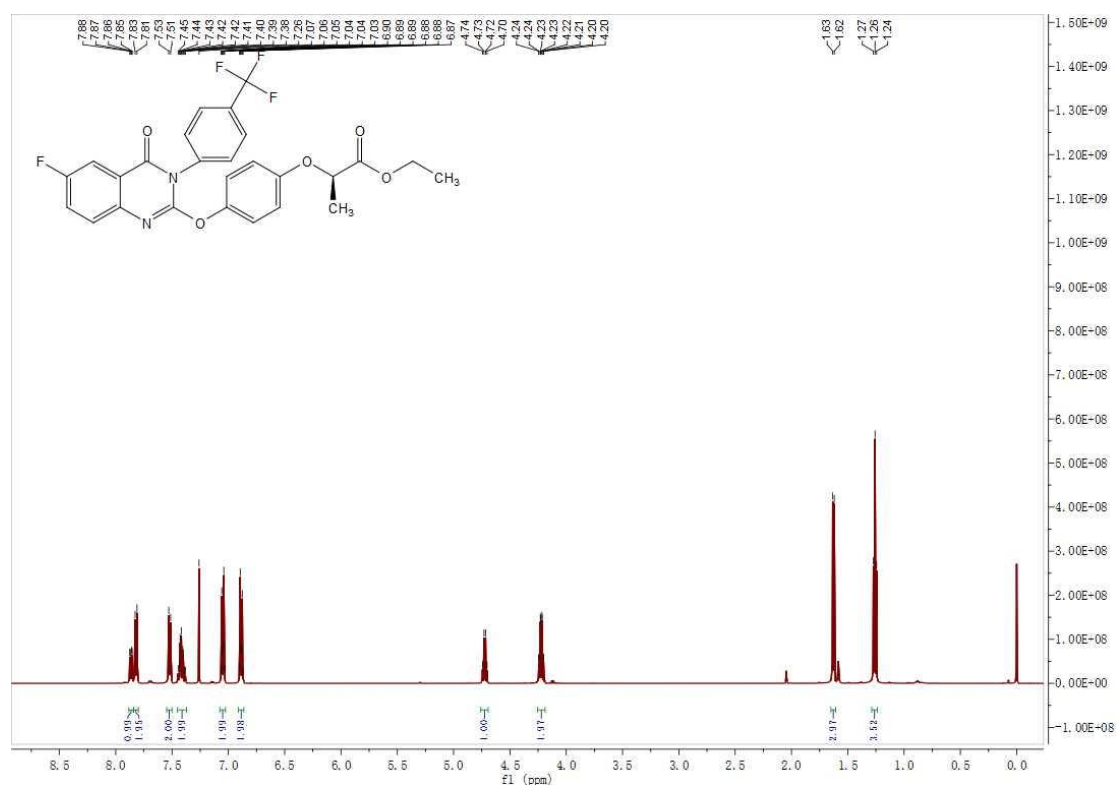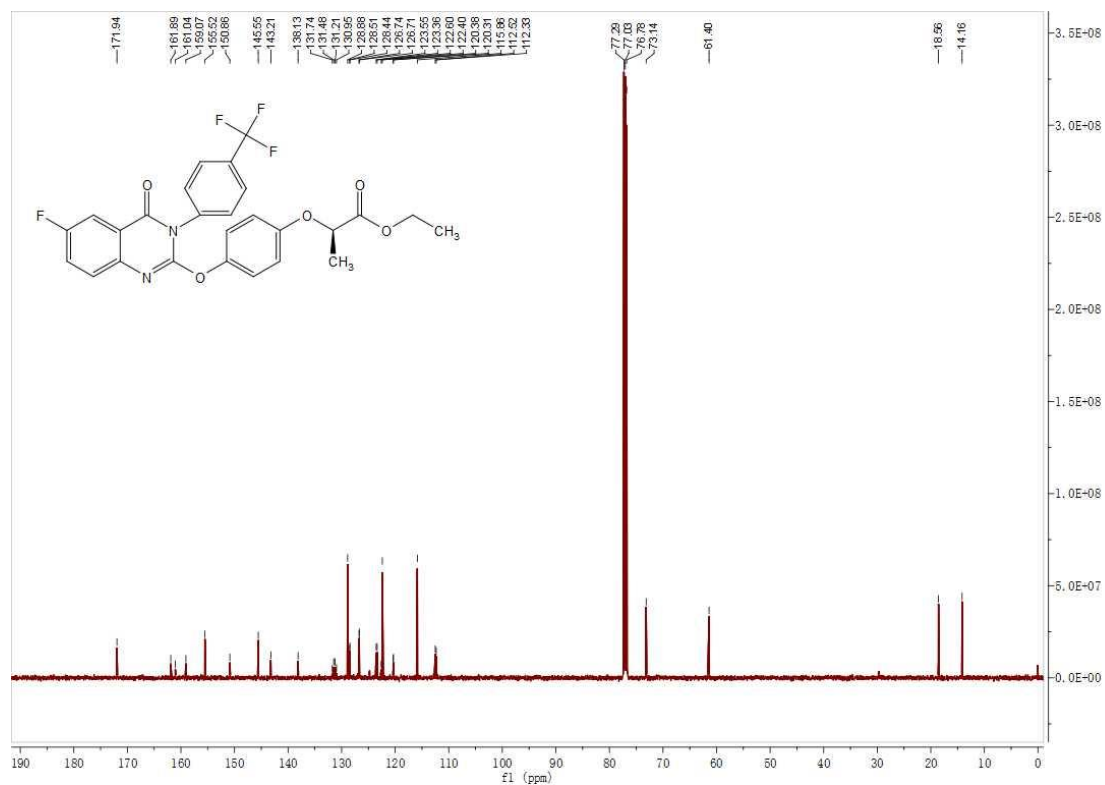

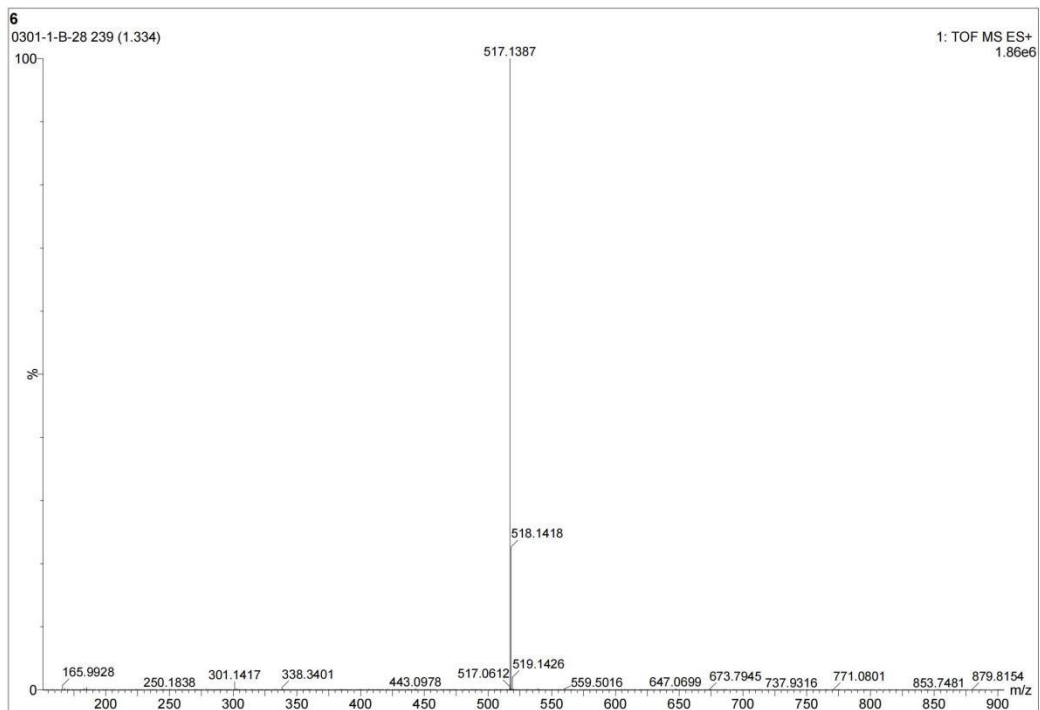

Supplement: s1 [file s1]
